# Supplementary material for: Transporter genes in biosynthetic gene clusters predict metabolite characteristics and siderophore activity
Source: HighWire-hosted journal article supplement (doi:10.1101/gr.268169.120), 2020-12-23
Supplement: Supplemental_Tables_S1-S7.xlsx [file Supplemental_Tables_S1-S7.xlsx]

## Sheet: Table S1 - BGCs
BGC	Genus	Name	Compound_count	MW	TPSA	LOGP	HACC	HDON	Type	Activities	Gram	Antibacterial	Antifungal	Siderophore	Orf_length	Structure
BGC0001311	Ruminococcus	flavecins	1	-1					RiPP	Antibacterial	1	1	0	0	20
BGC0001753	Streptomyces	radamycin	2	1105.27	379.51	3.13344	20	9	RiPP		1	1	0	0	18	CC(C)C1NC(=O)C2=CSC(=N2)C2=C(N=C(C=C2)C(=O)NC(=C)C(=O)NC(=C)C(N)=O)C2=C(C)OC(=N2)C(=C)NC(=O)C(=C)NC(=O)C2=CSC(=N2)C(C)NC(=O)C2=CSC(=N2)C(C)NC(=O)C2=C(C)OC(CNC1=O)=N2
BGC0002030	Byssochlamys	viriditoxin	1	-1					Polyketide		2	0	0	0	14
BGC0001323	Solanum	monoterpenes-diterpenes	1	-1					Terpene		3	0	0	0	12
BGC0001454	Streptomyces	germicidin	1	196.11	50.44	2.4213	3	1	Other		1	0	0	0	1	CCC(C)C1=CC(O)=C(CC)C(=O)O1
BGC0001656	Planktothrix	luminaolide	1	1539	341.04	8.481	24	6	Polyketide		0	0	0	0	30	C[C@@H]1[C@H](C[C@H]2O[C@@H](C=CC2)C[C@H](C[C@@H](CC(=O)O[C@H](C[C@H](C[C@@H]([C@@H]([C@H](C[C@H]3O[C@@H](C=CC3)C[C@H](C[C@@H](CC(=O)O[C@H](C[C@H](C[C@@H]1O)O)[C@H]([C@H](OC)[C@H](CCC(=O)[C@H]([C@@H](OC)[C@@H](/C=C/N(C=O)C)C)C)C)C)O)OC)OC)C)O)O)[C@H]([C@H](OC)[C@H](CCC(=O)[C@H]([C@@H](OC)[C@@H](/C=C/N(C=O)C)C)C)C)C)O)OC)OC
BGC0000126	Streptomyces	pladienolide b	1	536.335	125.82	4.0211	8	3	Polyketide		1	0	0	0	8	CCC(O)C(C)C1OC1CC(C)\C=C\C=C(/C)C1OC(=O)CC(O)CCC(C)(O)C(OC(C)=O)\C=C\C1C
BGC0002002	Serratia	1,6-phenazinedimethanol	2	-1					NRP		0	0	0	0	15
BGC0000706	Streptomyces	kanamycin	1	484.238	282.61	-7.2914	15	11	Saccharide		1	1	0	0	13	C1[C@H]([C@@H]([C@H]([C@@H]([C@H]1N)O[C@@H]2[C@@H]([C@H]([C@@H]([C@H](O2)CN)O)O)O)O)O[C@@H]3[C@@H]([C@H]([C@@H]([C@H](O3)CO)O)N)O)N
BGC0000804	Streptomyces	acarviostatin i03	4	969.354	479.47	-12.9161	29	20	Saccharide		1	0	0	0	27	C[C@@H]1[C@H]([C@@H]([C@H]([C@H](O1)O[C@@H]2[C@H](O[C@@H]([C@@H]([C@H]2O)O)O[C@@H]3[C@H](O[C@H]([C@@H]([C@H]3O)O)O[C@@H]4[C@H](O[C@H]([C@@H]([C@H]4O)O)O[C@@H]5[C@H](O[C@H]([C@@H]([C@H]5O)O)O)CO)CO)CO)CO)O)O)N[C@H]6C=C([C@H]([C@@H]([C@H]6O)O)O)CO
BGC0001338	Monascus	citrinin	1	250.084	83.83	1.721	4	2	Polyketide	Cytotoxic	2	0	0	0	16	C[C@@H]1OC=C2C(O)=C(C(O)=O)C(=O)C(C)=C2[C@H]1C
BGC0001637	Klebsiella	kleboxymycin	1	-1					NRP		0	0	0	0	12
BGC0000098	Monascus	monacolin k	1	404.256	72.83	4.1955	5	1	Polyketide		2	0	0	0	9	[H][C@]12[C@H](C[C@@H](C)C=C1C=C[C@H](C)[C@@H]2CC[C@@H]1C[C@@H](O)CC(=O)O1)OC(=O)[C@H](C)CC
BGC0001815	Streptomyces	uncialamycin	1	439.106	119.39	1.2443	7	4	Polyketide		1	1	0	0	32	CC([C@]12[C@@H]3C#C/C=C\C#C[C@H]([C@@]1(O2)C4=CC(=C5C(=C4N3)C(=O)C6=CC=CC=C6C5=O)O)O)O
BGC0001223	uncultured	hydroxysporine	1	-1					Other		3	0	0	0	6
BGC0000623	Lactobacillus	plantaricin w α	2	-1					RiPP		1	0	0	0	3
BGC0001088	Xanthomonas	albicidin	1	842.255	285.74	5.71618	12	9	NRP		0	0	0	0	20	C/C(=C\C1=CC=C(C=C1)O)/C(=O)NC2=CC=C(C=C2)C(=O)N[C@@H](CC#N)C(=O)NC3=CC=C(C=C3)C(=O)NC4=C(C(=C(C=C4)C(=O)NC5=C(C(=C(C=C5)C(=O)O)O)OC)O)OC
BGC0001746	Streptomyces	pristinol	1	222.198	20.23	3.92	1	1	Terpene		1	0	0	0	1	C[C@@H]1CC/C/2=C(/C[C@@H](CC(C[C@@H]12)(C)C)O)\C
BGC0001188	Streptomyces	legonaridin	1	-1					RiPP		1	0	0	0	12
BGC0000144	Streptomyces	salinomycin	1	750.492	161.21	6.188	10	4	Polyketide	anticoccidial	1	1	0	0	49	CC[C@H]([C@@H]1[C@H](C[C@H]([C@@]2(O1)C=C[C@H]([C@]3(O2)CC[C@@](O3)(C)[C@H]4CC[C@@]([C@@H](O4)C)(CC)O)O)C)C)C(=O)[C@@H](C)[C@H]([C@H](C)[C@H]5[C@H](CCC(O5)[C@@H](CC)C(=O)O)C)O
BGC0000151	Streptomyces	stambomycin a	4	1373.95	380.91	5.7787	22	16	Polyketide	Antibacterial,antiproliferative	1	1	0	0	25	O=C(OC(/C=C/C(O)CC(CCCC(C(C1O)C)O)O)C)CC2(O)OC(C[C@H](O[C@@H]3O[C@H](C)[C@@H](O)[C@H](N(C)C)[C@H]3O)C2C)C(C)C(O)/C(C)=C/C=C/CC(O)C(C)C(O)CCCC(O)CC(O)/C(C)=C/C(C(O)C(O)CCC(C)CC(O)CC(O)C(C)CC1)CCCC(CC)C
BGC0000220	Streptomyces	enterocin	1	444.106	163.73	-0.872	10	4	Polyketide	Antibacterial	1	1	0	0	20	[H][C@]12C[C@@]3(O)[C@@H](C4=CC(OC)=CC(=O)O4)[C@](O)([C@H](C(=O)C4=CC=CC=C4)[C@@]3(O)C(=O)O1)[C@@H]2O
BGC0000543	Staphylococcus	pep5	1	3587.78	1403.49	-12.3609	52	54	RiPP		1	0	0	0	6	CC[C@H](C)[C@@H](C(=O)N[C@@H](CCCNC(=N)N)C(=O)N[C@@H](C)C(=O)N[C@H](CS)C(=O)N[C@@H](C(C)C)C(=O)N[C@@H](CCCCN)C(=O)N[C@@H](CCC(=O)O)C(=O)N[C@@H](CS)C(=O)N[C@@H](CCC(=O)O)C(=O)N[C@@H](CCCCN)C(=O)N/C(=C\C)/C(=O)N[C@@H](CC(C)C)C(=O)N[C@@H](CCCCN)C(=O)N[C@@H](C)C(=O)N/C(=C\C)/C(=O)N[C@@H](CCCNC(=N)N)C(=O)N[C@@H](CC(C)C)C(=O)N[C@@H](CC1=CC=CC=C1)C(=O)N/C(=C(\C)/S)/C(=O)N[C@@H](C(C)C)C(=O)N[C@@H](CS)C(=…
BGC0001419	Hyalangium	myxochromide d	1	736.416	206.1	2.3527	8	5	NRP		0	0	0	0	20	C1(=O)N[C@@H](CC(C)C)C(=O)N[C@@H](C)C(=O)N[C@@H](CCC(=O)N)C(=O)O[C@H](C)[C@H](N(C)C(=O)/C=C/C=C/C=C/C=C/C=C/C=C/C=C/CC)C(=O)N[C@@H]1C
BGC0001446	Aspergillus	asparasone a	1	358.069	152.36	1.2969	8	5	Polyketide	Antiinsectan	2	0	0	0	4	CC(=O)CC(O)C1=C(O)C2=C(C=C1O)C(=O)C1=C(C(O)=CC(O)=C1)C2=O
BGC0001822	Cystobacter	vioprolide a	1	862.426	256.45	-0.8073	13	6	NRP		0	0	0	0	12	C\C=C1/NC(=O)C2CSC(=N2)C2CC(C)N2C(=O)C(CC(C)C)NC(=O)C(C)NC(=O)C(O)COC(=O)C(C(C)C)N(C)C(=O)C(NC(=O)C2CCCCN2C1=O)C(C)O
BGC0001687	uncultured	n-tetradecanoyl tyrosine	1	365.257	89.79	3.6511	4	4	Other		3	0	0	0	32	CCCCCCCCCCCC(=O)N[C@@H](Cc1ccc(O)cc1)C(O)O
BGC0000195	Streptomyces	alnumycin a	9	416.147	122.52	2.0245	8	3	Polyketide		1	0	0	0	32	OC1=C2C(C=C(C)O[C@@H]2CCC)=CC3=C1C(C([C@]4([H])O[C@@H](CO)[C@H](O)CO4)=CC3=O)=O
BGC0000292	Aspergillus	acetylaranotin	1	504.066	111.68	1.7084	10	0	NRP		2	0	0	0	10	CC(=O)OC1C=COC=C2C1N3C(=O)C45CC6=COC=CC(C6N4C(=O)C3(C2)SS5)OC(=O)C
BGC0002015	Streptomyces	aborycin	1	-1					RiPP		1	0	0	0	14
BGC0002020	Photorhabdus	photolose	1	-1					Saccharide		0	0	0	0	5
BGC0001759	Amycolatopsis	rifamorpholine a	5	711.289	210.54	4.26912	13	6	Polyketide		1	0	0	0	63	C[C@@H]1[C@H](/C=C/O[C@@]2(C(=O)C3=C(O2)C(=C(C4=C3C(=C(C5=C4O[C@@](/C=C\C=C(\[C@H]([C@H]([C@H]([C@H]([C@@H]1OC(=O)C)C)O)C)O)/C)(C(=O)N5)C)O)O)O)C)C)OC
BGC0001765	Agrobacterium	salecan	1	-1					Saccharide		0	0	0	0	20
BGC0001784	Streptomyces	streptoseomycin	1	-1					Polyketide		1	1	0	0	41
BGC0001692	Xenorhabdus	nematophin	1	272.152	61.96	2.4418	2	2	NRP		0	0	0	0	16	CCC(C)C(=O)C(=O)NCCC1=CNC2=CC=CC=C12
BGC0001341	Rothia	valinomycin	1	1110.63	332.4	2.3433	18	6	NRP		1	0	0	1	5	CC(C)[C@@H]1NC(=O)C(C)OC(=O)[C@H](NC(=O)[C@H](OC(=O)[C@@H](NC(=O)[C@H](C)OC(=O)[C@H](NC(=O)[C@H](OC(=O)[C@@H](NC(=O)[C@H](C)OC(=O)[C@H](NC(=O)[C@H](OC1=O)C(C)C)C(C)C)C(C)C)C(C)C)C(C)C)C(C)C)C(C)C)C(C)C
BGC0001252	Alternaria	unii-yc2q1o94pt	1	354.204	107.22	2.0112	6	4	Polyketide		2	0	0	0	1	C/C=C(\C)/[C@H]([C@@H](C)/C=C/[C@H]([C@@H](C)[C@H](C[C@@H]1CC(=CC(=O)O1)O)O)O)O
BGC0001670	Streptomyces	monensin	1	670.429	153.37	4.2729	10	4	Polyketide		1	0	0	0	20	CCC1(CCC(O1)C1(C)CCC2(CC(O)C(C)C(O2)C(C)C(OC)C(C)C(O)=O)O1)C1OC(CC1C)C1OC(O)(CO)C(C)CC1C
BGC0001212	Nannocystis	nannocystin a	1	815.332	167.03	5.8544	9	4	NRP	Antifungal,Cytotoxic	0	0	1	0	14	C[C@@H](CC)[C@@H]1N(C([C@@]2(C)[C@H](C[C@H](/C(C)=C/C=C/[C@H]([C@@H](C3=CC=CC=C3)OC([C@H](C(O)(C)C)NC([C@H](NC1=O)CC4=CC(Cl)=C(O)C(Cl)=C4)=O)=O)C)OC)O2)=O)C
BGC0000657	Pseudanabaena	2-methylisoborneol	1	413.004	80.73	2.20079	8	1	Terpene	Odorous metabolite	0	0	0	0	4	COC(=O)[C@@H]1C[C@@H](CN1CN2C(=S)OC(=N2)C3=CC(=CC=C3)Br)O
BGC0001874	Aspergillus	cyclopiazonic acid	1	336.384					NRP	Cytotoxic,Inhibitor	2	0	0	0	3
BGC0001606	Fusarium	gibepyrone-a	1	164.084	30.21	2.37142	2	0	Polyketide		2	0	0	0	5	C\C=C(/C)C1=CC=C(C)C(=O)O1
BGC0000309	Bacillus	bacillibactin	1	882.256	374.88	-2.2269	18	12	NRP		1	0	0	1	13	C[C@@H]1[C@@H](C(=O)O[C@@H]([C@@H](C(=O)O[C@@H]([C@@H](C(=O)O1)NC(=O)CNC(=O)C2=C(C(=CC=C2)O)O)C)NC(=O)CNC(=O)C3=C(C(=CC=C3)O)O)C)NC(=O)CNC(=O)C4=C(C(=CC=C4)O)O
BGC0000067	Streptomyces	geldanamycin	1	560.273	163.48	2.4084	9	3	Polyketide		1	0	0	0	4	C[C@H]1C[C@@H]([C@@H]([C@H](/C=C(/[C@@H]([C@H](/C=C\C=C(\C(=O)NC2=CC(=O)C(=C(C1)C2=O)OC)/C)OC)OC(=O)N)\C)C)O)OC
BGC0001150	Streptomyces	pamamycin-607	1	607.445	83.53	6.3214	8	0	Polyketide		1	0	0	0	20	CCCC(CC1CCC(O1)C(C)C1OC(=O)C(C)C2CCC(CC(CCC)OC(=O)C(C)C3CCC(O3)C1C)O2)N(C)C
BGC0001887	Bacillus	huazacin	1	-1					RiPP		1	0	0	0	5
BGC0001452	Streptomyces	sipanmycin	1	-1					Polyketide	Cytotoxic	1	0	0	0	36
BGC0001724	Penicillium	oxaleimide c	1	-1					NRP		2	0	0	0	20
BGC0001006	Salinispora	lymphostin	4	310.107	106.67	2.1822	6	2	NRP	Inhibitor	1	0	0	0	12	CO\C=C\C(=O)C1=NC2=C3C(C=NC3=C(N)C=C2NC(C)=O)=C1
BGC0000541	Paenibacillus	paenicidin a	1	-1					RiPP		1	0	0	0	7
BGC0001545	Fusarium	chrysogine	1	190.074	65.98	0.9764	3	2	NRP		2	0	0	0	6	C[C@H](O)C1=NC2=C(C=CC=C2)C(=O)N1
BGC0001148	Streptomyces	pheganomycin	1	610.307	318.8	-2.5059	10	11	NRP		1	0	0	0	21	CC(C)(C)[C@@H](C(=O)N[C@@H](CCCCN)C(=O)O)NC(=O)[C@H](CC(=O)N)NC(=O)[C@H](C1=CC(=C(C(=C1)O)CO)O)N=C(N)N
BGC0000288	Streptomyces	a-503083 a	4	626.218	285.85	-4.0812	14	7	NRP		1	0	0	0	55	COC1C(OC(N)=O)C(OC1C(OC1OC(=CC(O)C1O)C(=O)NC1CCCC(C)NC1=O)C(N)=O)N1C=CC(=O)NC1=O
BGC0000949	Streptomyces	a-500359 a	2	583.213	253.76	-4.1842	13	7	NRP		1	0	0	0	37	O[C@@H]1[C@H](OC)[C@@]([H])([C@H](C(N)=O)O[C@H]2OC(C(N[C@@H]3C(N[C@H](C)CCC3)=O)=O)=C[C@H](O)[C@@H]2O)O[C@H]1N(C=C4)C(NC4=O)=O
BGC0000086	Streptomyces	lasalocid	1	612.364	136.35	1.51152	8	3	Polyketide		1	0	0	0	24	CCC(C1C(CC(O1)(CC)C2CCC(C(O2)C)(CC)O)C)C(=O)C(C)C(C(C)CCC3=C(C(=C(C=C3)C)O)C(=O)[O-])O.[Na+]
BGC0002008	Xenorhabdus	aryl polyenes	1	-1					Other		0	0	0	0	18
BGC0000092	Micromonospora	megalomicin a	4	876.556	226.61	1.5818	17	6	Polyketide		1	0	0	0	19	CC[C@@H]1[C@@]([C@@H]([C@H](C(=O)[C@@H](C[C@@]([C@@H]([C@H]([C@@H]([C@H](C(=O)O1)C)O[C@H]2C[C@@]([C@H]([C@@H](O2)C)O)(C)O)C)O[C@H]3[C@@H]([C@H](C[C@H](O3)C)N(C)C)O)(C)O[C@H]4C[C@H]([C@H]([C@@H](O4)C)O)N(C)C)C)C)O)(C)O
BGC0000298	Microcystis	aeruginosin 98-a	3	688.266	244.47	0.81697	9	8	NRP	Inhibitor	0	0	0	0	14	[H]C12CC(N(C(=O)[C@H](NC(=O)C(O)CC3=CC(Cl)=C(O)C=C3)[C@H](C)CC)C1([H])CC(CC2)OS(O)(=O)=O)C(=O)NCCCCNC(N)=N
BGC0001941	Myxococcus	fulvuthiacene a	2	-1					NRP		0	0	0	0	24
BGC0000359	Thermobifida	fuscachelin a	3	1029.43	509.36	-6.4976	18	17	NRP		1	0	0	0	9	C1C[C@@H](C(=O)OC[C@@H](C(=O)N(C1)O)NC(=O)CNC(=O)CNC(=O)[C@@H](CCCN=C(N)N)NC(=O)C2=C(C(=CC=C2)O)O)NC(=O)CNC(=O)CNC(=O)[C@@H](CCCN=C(N)N)NC(=O)C3=C(C(=CC=C3)O)O
BGC0000955	Myxococcus	althiomycin	1	439.062	149.76	-0.3804	11	3	NRP	Antibacterial	0	1	0	0	6	COC1=CC(=O)N(C1)C(=O)C2CSC(=N2)C(CO)NC(=O)C3=CSC(=CN=O)N3
BGC0000799	Escherichia	colanic acid	1	-1					Saccharide		0	0	0	0	21
BGC0000422	Streptomyces	saframycin a	2	562.206	163.18	-0.14942	11	1	NRP		1	0	0	0	47	CC1=C(C(=O)C2=C(C1=O)C[C@H]3[C@H]4C5=C(C[C@H](N4C)[C@@H](N3[C@H]2CNC(=O)C(=O)C)C#N)C(=O)C(=C(C5=O)OC)C)OC
BGC0000854	Methylomicrobium	ectoine	1	142.074	61.69	-0.1487	3	2	Other		0	0	0	0	6	CC1=NCC[C@H](N1)C(=O)O
BGC0000199	uncultured	arimetamycin b	3	544.158	189.28	0.7585	12	5	Polyketide		3	0	0	0	37	CO[C@H]1[C@H](O[C@H]2C[C@H](O)[C@@H](O)[C@H](C)O2)C2=C(C=C3C(=O)C4=C(C(O)=CC(OC)=C4)C(=O)C3=C2O)C(=O)[C@@]1(C)O
BGC0000692	Streptoalloteichus	apramycin	1	539.28	283.64	-6.9493	16	11	Saccharide		1	1	0	0	31	CN[C@H]1[C@H]([C@@H]2[C@H](C[C@H](C(O2)O[C@@H]3[C@H](C[C@H]([C@@H]([C@H]3O)O)N)N)N)O[C@@H]1O[C@@H]4[C@@H]([C@H]([C@@H]([C@H](O4)CO)N)O)O)O
BGC0001115	Pseudoalteromonas	thiomarinol	1	640.249	178.41	3.4322	11	6	NRP		0	0	0	0	37	CC(O)C(C)\C=C\CC1COC(C(O)C(\C)=C\C(=O)OCCCCCCCC(=O)NC2=C3SSC=C3NC2=O)C(O)C1O
BGC0001608	[Polyangium]	glidopeptin	1	-1					NRP		0	0	0	0	8
BGC0001443	Actinomadura	matlystatin a	1	440.3	127.84	2.084	6	4	NRP	Inhibitor	1	0	0	0	18	[H][C@](C)(CC)[C@]([H])(NC(=O)[C@@H]1CCCNN1C(=O)[C@H](CCCCC)CC(=O)NO)C(=O)CC
BGC0001486	Pseudomonas	3-thiaglutamate	1	-1					RiPP		0	0	0	0	10
BGC0000892	Burkholderia	caryoynencin	1	280.11	57.53	1.7481	2	2	Other	Antibacterial	0	1	0	0	12	C#CC#CC#CC#C/C=C/C=C/C(CCCCC(=O)O)O
BGC0001149	Pseudomonas	brabantamide a	1	-1					NRP	Antibacterial	0	1	0	0	5
BGC0000161	Aspergillus	isoterrein	1	154.063	57.53	-0.2066	3	2	Polyketide		2	0	0	0	11	C\C=C\C1=CC(=O)[C@@H](O)[C@H]1O
BGC0001844	Paraburkholderia	holrhizin	1	816.5					NRP	Surfactant	0	0	0	0	3
BGC0000341	Streptomyces	enduracidin	1	1100.5	350.36	0.19662	24	11	NRP		1	1	0	0	48	CO[C@H](C(O)[C@@H](O)[C@@H](C)O)[C@@H]1CC2=CC3=CC(OC4CC(OC5CC(O)C(OC)C(C)O5)C(O)C(C)O4)=C(C)C(O)=C3C(O)=C2C(=O)[C@H]1OC1CC(OC2CC(OC3CC(C)(O)C(O)C(C)O3)C(O)C(C)O2)C(O)C(C)O1
BGC0001515	Aspergillus	aspercryptins	1	-1					NRP		2	0	0	0	15
BGC0000551	Streptomyces	sapb	1	2025.96	868.53	-11.8606	31	31	RiPP	Surfactant	1	0	0	0	4	CCC(C)C1C(=O)NC(C(=O)NC(C(=O)NC(CSCC(C(=O)NC(C(=O)NC(C(=O)NC(=C)C(=O)N1)CC(C)C)CO)NC(=O)C(CC(=O)O)NC(=O)CNC(=O)C2CSCC(C(=O)NC(C(=O)NC(C(=O)NC(=C)C(=O)NC(C(=O)NC(C(=O)NC(C(=O)N2)CC(C)C)CC(C)C)CC(C)C)C)CCCNC(=N)N)NC(=O)CNC(=O)C(C(C)O)N)C(=O)NC(CC(=O)N)C(=O)O)C(C)O)C(C)O
BGC0001857	Aspergillus	burnettramic acid a	1	769.498	217.68	3.7315	12	8	Polyketide	Antibacterial	2	1	0	0	9	O[C@H]([C@@H](CO)O[C@@H](OCCCCCC(O)CCCC(O)C/C=C/CCCCCCCCCC(CC(/C(O)=C1C(N(C[C@H](O)C2)[C@]2([H])C/1=O)=O)C)C)[C@H]3O)[C@@H]3O
BGC0001287	Streptomyces	chaxamycin a	4	639.304	201.69	3.05452	10	7	Polyketide		1	0	0	0	29	C[C@H]1\C=C\C=C/C(=O)NC2=C(C)C(=O)C3=C(C(O)=C(C)C(O)=C3C2=O)C(=O)\C(C)=C\[C@H](C)[C@H](O)[C@@H](C)[C@@H](O)[C@H](C)[C@H](O)[C@H](C)[C@H]1O
BGC0000407	Bacillus	plipastatin	1	1462.8	512.91	1.0835	19	16	NRP		1	0	0	0	13	CCCCCCCCCCCCCC(CC(=O)NC(CCC(=O)O)C(=O)NC(CCCN)C(=O)NC1CC2=CC=C(C=C2)OC(=O)C(NC(=O)C(NC(=O)C(NC(=O)C3CCCN3C(=O)C(NC(=O)C(NC(=O)C(NC1=O)C(C)O)CCC(=O)O)C)CCC(=O)N)CC4=CC=C(C=C4)O)C(C)CC)O
BGC0000572	Burkholderia	capistruin	1	-1					RiPP		0	0	0	0	4
BGC0001483	Streptomyces	5-isoprenylindole-3-carboxylate β-d-glycosyl ester	1	387.132	129.08	1.88	6	4	Other		1	0	0	0	21	CC(=CCC1=CC2=C(C=C1)C(=CN2)C(=O)O[C@H]3[C@@H]([C@H](C=C(O3)C(=O)O)O)O)C
BGC0000530	Streptococcus	mutacin b-ny266	1	-1					RiPP		1	0	0	0	9
BGC0001966	Phoma	bii-rafflesfungin	1	-1					NRP		2	0	0	0	13
BGC0000937	Streptomyces	fosfazinomycin a	1	453.21	241.68	-3.9223	10	7	Other	Antifungal	1	0	1	0	19	CC(C)[C@@H](C(=O)N[C@@H](CCCN=C(N)N)C(=O)NN(C)[P+](C(C(=O)OC)O)(O)[O-])N
BGC0000646	uncultured	β-carotein	1	536.438	0	12.6058	0	0	Terpene	Antioxidant	3	0	0	0	6	CC1=C(C(CCC1)(C)C)/C=C/C(=C/C=C/C(=C/C=C/C=C(/C=C/C=C(/C=C/C2=C(CCCC2(C)C)C)\C)\C)/C)/C
BGC0000464	Xenorhabdus	xenoamicin a	2	1299.82	387.02	0.4801	15	11	NRP	antiparasitic	0	0	0	0	24	O=C(N[C@H](C(N[C@H](C(C)C)C(N[C@@H](C(C)C)C(N[C@H](C)C(NCCC1=O)=O)=O)=O)=O)C(C)C)[C@@H]([C@H](OC([C@@H](NC([C@@H]2N1CCC2)=O)C(C)C)=O)C)NC([C@H]([C@H](C)CC)NC([C@@H](CC(C)C)NC([C@H](C(C)C)NC([C@@H](C)NC([C@H]3N(C(CCC)=O)CCC3)=O)=O)=O)=O)=O
BGC0000198	Salinispora	arenimycin a	1	667.19	235.45	0.12512	15	6	Polyketide	Antibacterial,Cytotoxic	1	1	0	0	41	CC1=CC2=C(C(O)=C1C(OC)=O)[C@]3(C(C4=CC5=C(C(O)=C4C([C@]3(CC2)OC)=O)C(C=C(C5=O)N[C@@H]6[C@@H]([C@H]([C@H]([C@@H](O6)C)O)O)OC)=O)=O)O
BGC0000600	Bacillus	thurincin h	1	-1					RiPP		1	0	0	0	10
BGC0000514	Staphylococcus	gallidermin	1	2163.95	743.69	-6.0239	30	25	RiPP		1	0	0	0	11	CC[C@H](C)[C@@H](C(=O)N[C@@H](C)C(=O)N[C@@H]1CSC[C@@H](NC(=O)[C@@H](NC(=O)[C@@H](NC(=O)[C@@H](NC1=O)CCCCN)CC2=CC=CC=C2)CC(C)C)C(=O)N[C@@H]3[C@@H](SC[C@@H](NC(=O)CNC(=O)[C@@H]4CCCN4C3=O)C(=O)N[C@@H](C)C(=O)N[C@@H](CCCCN)C(=O)N/C(=C/C)/C(=O)NCC(=O)N[C@@H]5CSC[C@@H]6C(=O)N/C=C/SC[C@H](C(=O)N[C@H](C(=O)N6)CC7=CC=C(C=C7)O)NC(=O)[C@@H](NC(=O)[C@@H](NC5=O)CC8=CC=CC=C8)CC(=O)N)C)N
BGC0000673	Aspergillus	pimara-8(14),15-diene	1	272.25	0	6.1415	0	0	Terpene		2	0	0	0	3	CC1(C)CCC[C@]2(C)C3CC[C@@](C)(C=C)C=C3CC[C@@H]12
BGC0001953	Anabaena	puwainaphycin f	5	-1					NRP		0	0	0	0	13
BGC0000413	Pseudomonas	pyoverdin	1	1174.48	546.55	-6.1374	21	18	NRP		0	0	0	0	109	NC(=O)CCC(NC(=O)C(CCCN(O)C=O)NC(=O)C1CCN=C(N1)C(CO)NC(=O)[C@@H]1CCNC2=C(NC(=O)CCC(O)=O)C=C3C=C(O)C(O)=CC3=[N+]12)C(=O)NC(CCC(N)=O)C(=O)NC(CCCN(O)C=O)C(=O)NCC(O)=O
BGC0000312	Beauveria	bassianolide	1	908.609	186.44	5.7636	12	0	NRP		2	0	0	0	15	CC(C)CC1C(=O)OC(C(=O)N(C(C(=O)OC(C(=O)N(C(C(=O)OC(C(=O)N(C(C(=O)OC(C(=O)N1C)C(C)C)CC(C)C)C)C(C)C)CC(C)C)C)C(C)C)CC(C)C)C)C(C)C
BGC0001572	Pantoea	desferrioxamine e	1	600.348	208.92	0.8535	9	6	Other		0	0	0	0	4	C1CCNC(=O)CCC(=O)N(CCCCCNC(=O)CCC(=O)N(CCCCCNC(=O)CCC(=O)N(CC1)O)O)O
BGC0000942	Bacillus	petrobactin	1	718.354	278.91	0.0169	12	12	Other	Siderophore	1	0	0	1	6	OC(=O)C(O)(CC(=O)NCCCCNCCCNC(=O)C1=CC=C(O)C(O)=C1)CC(=O)NCCCCNCCCNC(=O)C1=CC=C(O)C(O)=C1
BGC0000835	Streptomyces	simocyclinone	1	929.23	289.19	3.60632	17	7	Polyketide		1	0	0	0	8	C[C@@H]1[C@@H]([C@@H](C[C@@H](O1)C2=C(C3=C(C=C2)C(=O)C45C(C3O)(O4)C(CC6(C5(C(=O)C=C(C6)C)O)O)O)O)OC(=O)/C=C/C=C/C=C/C=C/C(=O)NC7=C(C8=C(C(=C(C=C8)O)Cl)OC7=O)C)OC(=O)C
BGC0001641	Photorhabdus	kolossin	1	-1					NRP		0	0	0	0	2
BGC0000922	Pseudomonas	pseudomonas quinolone signal (pqs)	1	-1					Other		0	0	0	0	11
BGC0001549	Streptomyces	citrulassin b	1	-1					RiPP		1	0	0	0	5
BGC0000436	Rhizobium	syringolin a	1	493.29	165.73	0.6773	5	6	NRP		0	0	0	0	7	CC(C)C(NC(=O)NC(C(C)C)C(=O)NC1\C=C/CCNC(=O)\C=C/C(NC1=O)C(C)C)C(O)=O
BGC0000474	Microcystis	microcyclamide	1	582.183	156.93	3.66492	11	3	RiPP		0	0	0	0	9	CC[C@H](C)[C@H]1C2=NC(=CS2)C(=O)N[C@H](C3=NC(=CS3)C(=O)N[C@H](C4=NC(=C(O4)C)C(=O)N1)C)CC5=CN=CN5C
BGC0000829	Chromobacterium	violacein	1	-1					Alkaloid	Antibacterial,Cytotoxic,Signalling,antitumor	0	1	0	0	5
BGC0001137	Marinactinospora	marinacarboline a	4	387.158	84.08	3.8998	4	2	Alkaloid	antimalarial	1	0	0	0	13	COC1=CC=C(CCNC(=O)C2=NC(C(C)=O)=C3NC4=C(C=CC=C4)C3=C2)C=C1
BGC0001597	Actinomadura	fluvirucin b2	1	456.356	114.04	3.1046	6	4	Polyketide		1	0	0	0	36	CCC1CCCC(CC)C(=O)NCCCC(CC)C(CC1)O[C@@H]1O[C@@H](C)[C@H](O)[C@@H](N)[C@H]1O
BGC0000817	uncultured	methylarcyriarubin	1	341.116	68.96	3.5586	2	2	Alkaloid	Cytotoxic	3	0	0	0	4	O=C(N1C)C(C2=CNC3=CC=CC=C32)=C(C4=CNC5=CC=CC=C54)C1=O
BGC0000438	Pseudomonas	syringopeptin 25a	1	2398.36	941.5	15.1208	32	29	NRP		0	0	0	0	3	CCCCCCCC(CC(=N/C(=C\C)/C(=O)N1CCC[C@H]1C(=N[C@@H](C(C)C)C(=N[C@@H](C)C(=N[C@@H](C)C(=N[C@@H](C(C)C)C(=N[C@@H](CC(C)C)C(=N[C@@H](C)C(=N[C@@H](C)C(=N/C(=C\C)/C(=N[C@@H](C(C)C)C(=N/C(=C\C)/C(=N[C@@H](C)C(=N[C@@H](C(C)C)C(=N[C@@H](C)C(=N[C@@H](C)C(=N/C(=C\C)/C(=N[C@H]2C(OC(=O)[C@@H](N=C([C@@H](N=C([C@@H](N=C([C@@H](N=C([C@@H](N=C([C@@H](N=C([C@@H](N=C2O)CO)O)C)O)C(C)C)O)C)O)CCN)O)CCN)O)CC3=CC=C(C=C3)…
BGC0001861	Bacillus	bacillicin bag2o	1	-1					RiPP	Antibacterial	1	1	0	0	9
BGC0000744	Streptococcus	capsular polysaccharide	1	1322.45	660.55	-16.7828	38	25	Saccharide		1	0	0	0	7	CC(=O)N[C@@H]1[C@H](C[C@@](O[C@H]1[C@@H]([C@@H](CO)O)O)(C(=O)O)O[C@H]2[C@H]([C@H](O[C@H]([C@@H]2O)O[C@@H]3[C@H](O[C@@H]([C@@H]([C@H]3O)NC(=O)C)OC[C@@H]4[C@H]([C@@H]([C@H]([C@H](O4)O[C@H]5[C@H](O[C@H]([C@@H]([C@H]5O[C@H]6[C@@H]([C@H]([C@@H]([C@H](O6)CO)O)O)O)O)O[C@@H]7[C@H](O[C@H]([C@@H]([C@H]7O)O)O)CO)CO)O)O)O)CO)CO)O)O
BGC0001577	Prochloron	divamide b	1	1930.83	748.96	-11.8869	30	26	RiPP		0	0	0	0	5	CC[C@H](C)[C@H]1C(=O)N[C@H]2CS[C@H]([C@@H]3C(=O)N[C@H]4CS[C@H]([C@H](C(=O)N[C@H](C(=O)N1)C)NC(=O)[C@@H](NC(=O)[C@@H]5CCCN5C(=O)CNC(=O)[C@@H](NC(=O)[C@H](CNCCCC[C@H](NC(=O)[C@@H]([C@@H](SC[C@@H](C(=O)N[C@H](C(=O)N[C@H](C(=O)N3)CO)C)NC(=O)[C@H](CCC(=O)O)[N+](C)(C)C)C)NC(=O)[C@@H](NC(=O)CNC(=O)[C@@H](NC2=O)[C@H](C(=O)O)O)[C@@H](C)O)C(=O)O)NC4=O)CO)[C@@H](C)CC)C)C
BGC0000491	Lactobacillus	gassericin a	1	-1					RiPP		1	0	0	0	7
BGC0001650	Lysobacter	le-pyrrolopyrazines	1	-1					NRP		0	0	0	0	11
BGC0000985	Tistrella	didemnin b	4	1111.64	287.9	2.3165	15	5	NRP	Cytotoxic	0	0	0	0	11	CC[C@H](C)[C@@H]1[C@H](CC(=O)O[C@H](C(=O)[C@@H](C(=O)N[C@H](C(=O)N2CCC[C@H]2C(=O)N([C@H](C(=O)O[C@@H]([C@@H](C(=O)N1)NC(=O)[C@@H](CC(C)C)N(C)C(=O)[C@@H]3CCCN3C(=O)C(C)O)C)CC4=CC=C(C=C4)OC)C)CC(C)C)C)C(C)C)O
BGC0001972	Streptomyces	toxoflavin	2	-1					Other		1	0	0	0	28
BGC0001255	Fusarium	equisetin	1	373.225	77.84	3.0213	4	2	NRP		2	0	0	0	11	[H][C@@]12C[C@H](C)CC[C@@]1([H])[C@@](C)([C@H](\C=C\C)C=C2)C(\O)=C1\C(=O)[C@H](CO)N(C)C1=O
BGC0000105	Streptomyces	nanchangmycin	1	866.539	188.9	6.1496	13	4	Polyketide		1	0	0	0	33	C[C@H]1C[C@H]([C@@](O[C@@H]1[C@H]2C[C@@H]([C@@]3(O2)[C@@H]([C@H](C[C@@H](O3)[C@@]4(CC[C@@]5(O4)C[C@@H]([C@H]([C@H](O5)[C@@H](C)/C=C(\C)/C(=O)[C@H](C)C[C@H](C)C(=O)O)C)O)C)O[C@@H]6CC[C@@H]([C@@H](O6)C)OC)C)C)(CO)O)C
BGC0001289	Paenibacillus	penisin	1	-1					RiPP		1	0	0	0	9
BGC0001848	Micromonospora	diazaquinomycin h	2	-1					Other	Antibacterial	1	1	0	0	50
BGC0001631	Microcystis	kasumigamide	1	786.37	292.08	0.10717	9	12	NRP		0	0	0	0	6	NC(=N)NCCC[C@@H](NC(=O)C[C@H](O)[C@@H](CC1=CNC2=CC=CC=C12)NC(=O)CCNC(=O)[C@H](O)CC1=CC=CC=C1)C(=O)N[C@H]([C@H](O)C1=CC=CC=C1)C(O)=O
BGC0001633	Streptomyces	ketomemicin b3	2	509.275	207.27	0.73154	5	8	Other		1	0	0	0	6	N=C(N)NCCC[C@H](NC(=N)N)C(=O)N[C@@H](Cc1ccccc1)C(=O)C[C@@H](Cc2ccccc2)C(=O)O
BGC0000460	Vibrio	vulnibactin	1	673.275	202.61	2.432	11	6	NRP		0	0	0	1	16	CC1OC(=NC1C(=O)NCCCN(CCCNC(=O)C1=CC=CC(O)=C1O)C(=O)C1N=C(OC1C)C1=CC=CC=C1O)C1=CC=CC=C1O
BGC0000803	Lactobacillus	gg exopolysaccharide	1	-1					Saccharide		1	0	0	0	16
BGC0000093	Streptomyces	meilingmycin	1	612.366	100.52	5.9887	8	1	Polyketide		1	1	0	0	92	C[C@H]1CC[C@]2(C[C@@H]3C[C@H](O2)C/C=C(\C[C@H](/C=C\CC4COC5[C@@H]4[C@@H](C=C([C@H]5O)COC(=O)C=C(C)C)C(=O)O3)C)/C)OC1C
BGC0000388	Streptomyces	mannopeptimycin	1	1366.58	603.12	-14.6759	30	24	NRP		1	0	0	0	27	C[C@H]([C@H]1C(=O)N[C@@H](C(=O)N[C@H](C(=O)N[C@@H](C(=O)N[C@H](C(=O)NCC(=O)N1)CO)[C@H]([C@@H]2CNC(=[N+]2[C@@H]3[C@H]([C@H]([C@@H]([C@H](O3)O)O)O)O)N)O)[C@H]([C@@H]4C[NH+]=C(N4)N)O)CC5=CC=C(C=C5)O[C@@H]6[C@H]([C@H]([C@@H]([C@H](O6)CO)O[C@@H]7[C@H]([C@H]([C@@H]([C@H](O7)CO)O)OC(=O)CC(C)C)O)O)O)C8=CC=CC=C8
BGC0000138	Streptomyces	rimocidin	1	767.409	255.76	1.7028	14	8	Polyketide		1	0	1	0	11	CCC[C@@H]1C/C=C/C=C/C=C/C=C/[C@@H](C[C@H]2[C@@H]([C@H](C[C@](O2)(C[C@H](CCCC(=O)C[C@H]([C@@H](C(=O)O1)CC)O)O)O)O)C(=O)O)O[C@H]3[C@H]([C@H]([C@@H]([C@H](O3)C)O)N)O
BGC0000938	Streptomyces	fosfomycin	1	181.972	75.72	-7.3471	4	0	Other	Antibacterial,Inhibitor	1	1	0	0	29	C[C@H]1[C@H](O1)P(=O)([O-])[O-].[Na+].[Na+]
BGC0000167	Streptomyces	vicenistatin	1	500.361	79.82	4.979	5	3	Polyketide		1	0	0	0	20	CN[C@H]1[C@@H](O)C[C@H](OC2C\C=C(C)\C\C(C)=C\C=C\CCC(C)CNC(=O)\C=C\C=C\C2C)O[C@@H]1C
BGC0001031	Serratia	oocydin a	1	470.171	119.36	3.4123	7	2	NRP		0	0	0	0	23	C/C/1=C/C/C=C(\CCC2CC(C(O2)C(/C=C(\C)/CC(=O)O)O)OC(=O)CC1OC(=O)C)/Cl
BGC0000882	Streptomyces	mildiomycin	1	514.214	305.38	-5.37443	13	11	Other		1	0	0	0	17	NC(CO)C(=O)N[C@H]1C=C[C@@H](O[C@@H]1C(O)(CC(O)CNC(N)=N)C(O)=O)N1C=C(CO)C(N)=NC1=O
BGC0001603	Micromonospora	gentamicin	1	482.259	248.39	-6.0015	14	10	Saccharide		1	1	0	0	37	CC1(COC(C(C1NC)O)OC2C(CC(C(C2O)OC3C(C(C(C(O3)CO)O)O)N)N)N)O
BGC0000609	Nocardia	nocathiacin	1	1550.27	477.29	3.1554	32	11	RiPP		1	0	0	0	44	C[C@H]1[C@H]([C@@](C[C@@H](O1)O[C@H]2[C@@H]3[C@H]4C5=NC(=CS5)C(=O)N[C@@H](COC(=O)C6=C(CO3)C7=C(COC2=O)C=CC=C7N6O)C8=NC(=CS8)C9=N/C(=C/1\NC(=CS1)C(=O)NC(=C)C(=O)N)/C(=O)C=C9C1=NC(=CS1)C(=O)N[C@H](C(=O)N/C(=C(\C)/OC)/C1=NC(=CS1)C(=O)N4)[C@@H](C)O)(C)O)N(C)C.C(=O)(C(F)(F)F)O
BGC0000393	Myxococcus	myxoprincomide-c506	1	1010.53	426.37	-5.3464	17	16	NRP		0	0	0	0	3	CNC(CO)C(=O)NC(CC(C)C)C(=O)NC(C(O)(C)C)C(=O)NC(CO)C(=O)NC(C(C)C)C(=O)C(=O)NC(CO)C(=O)NC(CC1=CC=C(O)C=C1)C(=O)NC(CCCN)CC(=O)NC(C)C(=O)O
BGC0001968	uncultured	cadaside a	2	-1					NRP		3	0	0	0	21
BGC0001839	Aspergillus	squalestatin s1	1	-1					Terpene	Antifungal,Inhibitor	2	0	1	0	5
BGC0000856	Methylophaga	ectoine	1	142.074	61.69	-0.1487	3	2	Other		0	0	0	0	4	CC1=NCC[C@H](N1)C(=O)O
BGC0001284	Parastagonospora	alternariol	1	-1					Terpene		2	0	0	0	1
BGC0001944	Streptosporangium	funisamine	1	-1					Polyketide		1	0	0	0	40
BGC0001250	Epichloe	epichloenin a	1	1082.52	458.2	-5.3504	18	15	NRP		2	0	0	0	1	C/C(=C\C(=O)N(CCC[C@H]1C(=O)NCC(=O)NCC(=O)NCC(=O)NCC(=O)N[C@H](C(=O)N[C@H](C(=O)N[C@H](C(=O)N1)CCCN(C(=O)/C=C(\C)/CCO)O)CCCN(C(=O)/C=C(\C)/CCO)O)CCC(=O)N)O)/CCO
BGC0000593	Microcystis	microviridin j	1	1683.77	622.45	-3.64983	22	21	RiPP	Inhibitor	0	0	0	0	3	CCC(C)C(NC(C)=O)C(=O)N[C@@H](CO)C(=O)N[C@@H]1[C@@H](C)OC(=O)CC2NC(=O)[C@@H]3COC(=O)CC[C@@H](NC(=O)[C@H](CC4=CNC5=C4C=CC=C5)NC2=O)C(=O)N[C@@H](CCC(=O)NCCCC[C@H](NC(=O)C(CCCNC(N)=N)NC1=O)C(=O)N[C@@H](CC1=CC=C(O)C=C1)C(=O)N1CCC[C@H]1C(=O)N3)C(=O)N[C@@H](CC1=CC2=C(N1)C=CC=C2)C(O)=O
BGC0001228	Salinispora	retimycin a	1	1170.42	333.55	0.557	18	6	NRP	Cytotoxic	1	0	0	0	23	O=C(NC1C(NC(C)C(N(C)C2C(N(C)C3(C(C)C3)C(OC(C)C(NC(C4=NC5=CC=CC=C5C=C4O)=O)C(NC(C)C(N(C)C(C(S(C)=O)SC2)C(N(C)C6(C(C)C6)C(OC1C)=O)=O)=O)=O)=O)=O)=O)=O)C7=NC8=CC=CC=C8C=C7O
BGC0000168	Penicillium	viridicatumtoxin	4	565.195	207.84	1.7819	10	7	Polyketide	Antibacterial	2	1	0	0	22	COC1=C2C3=C(C(O)=C1)C(O)=C1C(=O)[C@]4(O)C(=O)C(C(N)=O)=C(O)C[C@]4(O)[C@@H](O)C1=C3C[C@]21C(C)=CCCC1(C)C
BGC0000177	Streptomyces	iso-migrastatin	5	489.273	119	3.191	7	2	Polyketide	Cytotoxic,Inhibitor	1	0	0	0	11	CO[C@H]1\C=C\CC\C=C\C(=O)OC([C@@H](C)[C@@H]1O)C(\C)=C\[C@H](C)C(=O)CCCC1CC(=O)NC(=O)C1
BGC0000769	Mycobacterium	glycopeptidolipid	1	-1					Saccharide		1	0	0	0	26
BGC0002023	Amycolatopsis	saalfelduracin	1	-1					RiPP		1	0	0	0	22
BGC0000538	Lactococcus	nisin z	1	-1					RiPP		1	0	0	0	6
BGC0001133	Xenorhabdus	taxlllaid a	1	807.547	230	2.3758	9	7	NRP		0	0	0	0	45	CC(C)CCCC(=O)N[C@H]1[C@@H](C)OC(=O)[C@H](C)NC(=O)[C@H](CC(C)C)NC(=O)[C@@H](CC(C)C)NC(=O)[C@@H](CC(C)C)NC(=O)[C@H](CC(C)C)NC(=O)[C@H](C)NC1=O
BGC0000163	Streptomyces	tetronasin	1	602.382	111.52	5.7361	8	2	Polyketide		1	0	0	0	52	C[C@@H]1CCC[C@@H]([C@H]1[C@H](C)/C(=C\2/C(=O)COC2=O)/O)/C=C(\CO)/[C@H]3[C@@H](CC[C@H](O3)/C=C/[C@H](C)[C@H]4[C@H](C[C@@H](O4)[C@H](C)OC)C)C
BGC0001172	Streptomyces	chlorizidine a	1	441.945	67.39	5.5189	5	2	NRP	Cytotoxic	1	0	0	0	26	OC1=CC2=C(C(=O)N3C(Cl)=C(Cl)C=C23)C(O)=C1[C@@H]1CCC2=CC(Cl)=C(Cl)N12
BGC0001616	Aspergillus	himeic acid a	1	435.189	150.98	3.2256	6	3	NRP		2	0	0	0	3	C[C@@H](CC(=O)NC(=O)C1=COC(\C=C\CCCCCCCCC(O)=O)=CC1=O)C(O)=O
BGC0000201	Streptomyces	auricin	1	541.195	137.9	1.6967	11	1	Polyketide	Antibacterial	1	1	0	0	29	OC1=CC=CC2=C1C(C([C@]3(O[C@H](C)CC([C@H]3OC4CCC(N(C)C)C(C)O4)=O)O[C@@](C5)([H])[C@]6([H])OC5=O)=C6C2=O)=O
BGC0001187	Glarea	xenolozoyenone	1	305.163	77.84	3.238	4	2	NRP		2	0	0	0	2	CCCCCC/C=C/C=C/C=C/C(O)=C1C(N(O)CC/1=O)=O
BGC0001625	Streptomyces	isofuranonaphthoquinone	1	-1					Polyketide		1	0	0	0	22
BGC0000704	Streptomyces	kanamycin	1	484.238	282.61	-7.2914	15	11	Saccharide		1	1	0	0	40	C1[C@H]([C@@H]([C@H]([C@@H]([C@H]1N)O[C@@H]2[C@@H]([C@H]([C@@H]([C@H](O2)CN)O)O)O)O)O[C@@H]3[C@@H]([C@H]([C@@H]([C@H](O3)CO)O)N)O)N
BGC0001408	Xanthomonas	xanthoferrin	1	-1					Other		0	0	0	1	7
BGC0000790	Escherichia	o-antigen	1	-1					Saccharide		0	0	0	0	12
BGC0000261	Streptomyces	r1128	1	-1					Polyketide		1	0	0	0	14
BGC0001850	Streptomyces	diazaquinomycin a	4	-1					Other	Antibacterial	1	1	0	0	20
BGC0000913	Enterobacter	mk-8	1	716.553	34.14	15.8239	2	0	Other		0	0	0	0	12	CC(C)=CCCC(C)=CCCC(C)=CCCC(C)=CCCC(C)=CCCC(C)=CCCC(C)=CCCC(C)=CCC1=C(C)C(=O)C2=C(C=CC=C2)C1=O
BGC0000296	Streptomyces	actinomycin d	1	1254.63	359.98	0.72564	18	5	NRP		1	0	0	0	28	[H][C@@]12CCCN1C(=O)[C@]([H])(NC(=O)[C@@]([H])(NC(=O)C1=CC=C(C)C3=C1N=C1C(O3)=C(C)C(=O)C(N)=C1C(=O)N[C@]1([H])C(=O)N[C@]([H])(C(C)C)C(=O)N3CCC[C@@]3([H])C(=O)N(C)CC(=O)N(C)[C@@]([H])(C(C)C)C(=O)O[C@]1([H])C)[C@@]([H])(C)OC(=O)[C@]([H])(C(C)C)N(C)C(=O)CN(C)C2=O)C(C)C
BGC0001547	Aspergillus	citreohybridonol	1	500.241	116.2	3.8326	8	1	Terpene		2	0	0	0	11	CC1=C[C@H]2[C@](C[C@H]3C4[C@]2(CC[C@@H](C4(C)C)OC(=O)C)C(=O)O3)([C@]5([C@@]1(C(=C(C5=O)C)O)C)C(=O)OC)C
BGC0000542	Paenibacillus	paenicidin b	1	-1					RiPP		1	0	0	0	7
BGC0000715	Streptomyces	actinospectacin	1	332.158	129.51	-2.9256	9	5	Saccharide		1	0	0	0	17	CNC1C(O)C(NC)C2OC3(O)C(OC(C)CC3=O)OC2C1O
BGC0000933	Streptomyces	xiamenmycin a	1	391.199	116.09	2.0513	5	4	Other		1	0	0	0	5	C[C@H]([C@@H](C(=O)O)NC(=O)C1=CC2=C(C=C1)O[C@@]([C@H](C2)O)(C)CCC=C(C)C)O
BGC0000384	Lyngbya	lyngbyatoxin	1	437.304	68.36	4.852	3	3	NRP	Cytotoxic,Tumor promoter, irritant, vesicant	0	0	0	0	4	CC(C)[C@H]1C(=O)N[C@@H](CC2=CNC3=C(C=CC(=C23)N1C)[C@](C)(CCC=C(C)C)C=C)CO
BGC0001762	Streptomyces	rubrolone a	2	-1					Alkaloid		1	0	0	0	36
BGC0000481	Trichodesmium	trichamide	1	1098.45	427	-2.19393	17	14	RiPP		0	0	0	0	11	CC(C)CC1NC(=O)[C@H](CCCNC(N)=N)NC(=O)[C@@H]2CCCN2C(=O)[C@H](CC2=CN=CN2)NC(=O)[C@H](CC(C)C)NC(=O)CNC(=O)[C@H](CC(O)=O)NC(=O)CNC(=O)C2=CSC(=N2)C(CO)NC(=O)C2=CSC1=N2
BGC0001727	Paenibacillus	paenilan	1	-1					RiPP		1	0	0	0	11
BGC0000439	Saccharomonospora	taromycin a	1	1639.57	681.79	-4.5156	23	21	NRP	Antibacterial	1	1	0	0	30	O=C(N[C@H](C(N[C@@H](C(N[C@@H](CC(O)=O)C(N[C@H](C(NCC(N[C@H](C(N[C@@H](CC(O)=O)C(N[C@H](C)C(N[C@H](C(NCC(N[C@@H](C(N[C@H](C(N[C@H]1CC(C2=CC=C(Cl)C=C2N)=O)=O)[C@H](C)CC(O)=O)=O)C)=O)=O)CC(O)=O)=O)=O)=O)CCCN)=O)=O)[C@@H](C)OC1=O)=O)=O)CC(N)=O)=O)CC3=CNC4=C3C=CC(Cl)=C4)/C=C/C=C/CCC
BGC0000204	Streptomyces	benastatin a	4	500.184	135.29	6.1166	6	5	Polyketide	Antibacterial,Inhibitor,Induciton of apoptosis	1	1	0	0	12	CCCCCC1=C(C(O)=O)C(O)=C2C(C=CC3=C2C=C2C(=C3O)C(=O)C3=C(O)C=C(O)C=C3C2(C)C)=C1
BGC0001804	Streptomyces	tiancimycin	1	334.214	63.6	3.4648	4	1	Polyketide		1	0	0	0	36	C[C@H]1C[C@H](C(=O)/C=C/C=C/[C@@H]([C@H](OC(=O)/C=C/[C@@H]([C@H]1O)C)C)C)C
BGC0001160	Synechococcus	1-nonadecene	2	266.297	0	7.4339	0	0	Polyketide		0	0	0	0	1	CCCCCCCCCCCCCCCCCC=C
BGC0001660	Marinactinospora	mathermycin	1	-1					RiPP		1	0	0	0	7
BGC0001550	Streptomyces	citrulassin d	1	-1					RiPP		1	0	0	0	5
BGC0000582	Streptomyces	cypemycin	1	2095.13	703.17	-3.3366	26	22	RiPP	Antibacterial,Cytotoxic	1	1	0	0	9	CCC(C)C(NC(=O)C(NC(=O)C(CC1=CC=CC=C1)NC(=O)C(CCC(N)=O)NC(=O)C(C)NC(=O)C(NC(=O)C(\NC(=O)C1CCCN1C(=O)C(\NC(=O)C(C)NC(=O)C1CCCN1C(=O)C(\NC(=O)C(C)N(C)C)=C/C)=C/C)=C\C)C(C)C)C(C)C)C(=O)NC(CCC(N)=O)C(=O)NCC(=O)NC(CO)C(=O)N\C(=C/C)C(=O)NC(C(C)CC)C(=O)NC1CS\C=C/NC(=O)C(NC(=O)C(CC(C)C)NC1=O)C(C)C
BGC0000128	Pseudomonas	pyoluteorin	1	270.98	73.32	2.9637	3	3	Polyketide		0	0	0	0	20	C1=CC(=C(C(=C1)O)C(=O)C2=CC(=C(N2)Cl)Cl)O
BGC0000768	Sphingomonas	gellan polysaccharide	1	-1					Saccharide		0	0	0	0	26
BGC0001686	Clostridium	n-octanoyl-met-phe-h	1	-1					NRP		1	0	0	0	9
BGC0000861	Shewanella	eicosapentaenoic acid	1	302.225	37.3	5.9927	1	1	Other		0	0	0	0	6	CC/C=C\C/C=C\C/C=C\C/C=C\C/C=C\CCCC(=O)O
BGC0001001	Lyngbya	jamaicamide a	3	566.155	75.71	5.738	4	1	NRP		0	0	0	0	26	CO\C(CCNC(=O)CC\C=C\C(C)CC\C(CCCC#CBr)=C\Cl)=C\C(=O)N1C(C)C=CC1=O
BGC0000325	Streptomyces	coelichelin	1	565.271	289.39	-3.6704	12	9	NRP		1	0	0	1	11	C[C@@H](O)[C@@H](NC(=O)[C@H](N)CCCN(O)C=O)C(=O)N(O)CCC[C@H](NC(=O)[C@H](N)CCCN(O)C=O)C(O)=O
BGC0001882	Penicillium	chrysoxanthone a	3	-1					Polyketide		2	0	0	0	23
BGC0001098	Bacillus	iturin	1	1042.54	436.83	-3.4721	14	13	NRP		1	0	0	0	9	CCCCCCCCCCCC1CC(=O)NC(C(=O)NC(C(=O)NC(C(=O)NC(C(=O)N2CCCC2C(=O)NC(C(=O)NC(C(=O)N1)CO)CC(=O)N)CCC(=O)N)CC(=O)N)CC3=CC=C(C=C3)O)CC(=O)N
BGC0000705	Streptomyces	kanamycin	1	484.238	282.61	-7.2914	15	11	Saccharide		1	1	0	0	36	C1[C@H]([C@@H]([C@H]([C@@H]([C@H]1N)O[C@@H]2[C@@H]([C@H]([C@@H]([C@H](O2)CN)O)O)O)O)O[C@@H]3[C@@H]([C@H]([C@@H]([C@H](O3)CO)O)N)O)N
BGC0000475	Prochloron	patellamide a	2	742.329	185.36	4.2121	12	4	RiPP		0	0	0	0	8	CC[C@H](C)[C@H]1C2=N[C@@H](CO2)C(=O)N[C@@H](C3=NC(=CS3)C(=O)N[C@H](C4=N[C@@H]([C@H](O4)C)C(=O)N[C@@H](C5=NC(=CS5)C(=O)N1)C(C)C)[C@@H](C)CC)C(C)C
BGC0001072	Streptomyces	simocyclinone d8	1	931.209	309.42	3.0035	18	8	Polyketide	Antibacterial,Cytotoxic	1	1	0	0	50	C[C@H]1O[C@H](C[C@@H](OC(=O)\C=C\C=C\C=C\C=C\C(=O)NC2=C(O)C3=C(OC2=O)C(Cl)=C(O)C=C3)[C@@H]1OC(C)=O)C1=CC=C2C(=O)C34OC3(C(O)CC3(O)CC(C)=CC(=O)C43O)C(O)C2=C1O
BGC0002006	Streptomyces	albusnodin	1	-1					RiPP		1	0	0	0	4
BGC0000518	Streptomyces	informatipeptin	1	1065.57					RiPP		1	0	0	0	7
BGC0000080	Sorangium	jerangolid a	2	376.225	64.99	3.8471	5	1	Polyketide		0	0	0	0	21	CC[C@H]1O[C@H](CC=C1C)C(\C)=C\[C@H](C)\C=C\[C@H]1CC(OC)=C(CO)C(=O)O1
BGC0000678	Streptomyces	pentalenolactone	1	276.1	76.13	1.1516	4	1	Terpene		1	0	0	0	13	C[C@H]1[C@H]2C=C([C@H]3[C@]2(C=C1C)[C@@]4(CO4)C(=O)OC3)C(=O)O
BGC0000587	Escherichia	microcin h47	1	-1					RiPP		0	0	0	0	15
BGC0001751	Pyxidicoccus	pyxipyrrolone a	2	481.283	106.86	4.4463	4	4	NRP		0	0	0	0	27	CC(C)[C@@H](O)C(C)/C=C/C=C/C=C(\C)/[C@]1(C)C2CC[C@@H](O)[C@H](C)C=2C2C(=O)NC(=C)C=2[C@@]1([H])C(O)=O
BGC0001163	Moorea	1-heptadecene	1	238.266	0	6.6537	0	0	Polyketide		0	0	0	0	2	CCCCCCCCCCCCCCCC=C
BGC0000677	Streptomyces	cyclooctatin	1	322.251	60.69	3.1354	3	3	Terpene	Inhibitor	1	0	0	0	4	CC(C)C\1CCC2(/C1=C\CC(C3C(CC(C3C2)CO)O)(C)O)C
BGC0001575	Ruminococcus	dipeptide aldehydes	1	-1					NRP		1	0	0	0	17
BGC0000730	Klebsiella	capsular polysaccharide	1	1004.31	523.2	-14.0081	31	20	Saccharide		0	0	0	0	15	C(C1C(C(C(C(O1)OC2C(C(OC(C2OC3C(C(C(C(O3)C(=O)O)OC4C(C(C(C(O4)CO)O)O)O)O)O)OC5C(OC(C(C5O)O)OCC6C(C(C(C(O6)O)O)O)O)CO)CO)O)O)O)O)O
BGC0000262	Streptomyces	prejadomycin	6	324.1	94.83	2.5712	5	3	Polyketide		1	0	0	0	48	OC1=CC=CC2=C1C(O)=C(C(C[C@@](CC(C)=C3)(O)[C@]4([H])C3=O)=O)C4=C2
BGC0001977	Phoma	eupenifeldin	1	-1					Other		2	0	0	0	11
BGC0001924	Acremonium	ascofuranone	1	-1					Terpene		2	0	0	0	3
BGC0000698	Streptomyces	hygromycin a	1	511.169	204.47	-2.4674	12	7	Saccharide		1	0	0	0	29	CC(=O)[C@H]1O[C@@H](OC2=C(O)C=C(\C=C(/C)C(=O)N[C@@H]3[C@H](O)[C@H]4OCO[C@H]4[C@@H](O)[C@@H]3O)C=C2)[C@@H](O)[C@@H]1O
BGC0001113	Burkholderia	spliceostatin	2	1002.57	244.28	4.5319	13	7	NRP		0	0	0	0	15	C[C@H]1C[C@H]([C@H](O[C@H]1C/C=C(\C)/C=C/[C@@H]2[C@H]([C@@]3(C[C@@](O2)(C)OCCNC(=O)CCCCCNC(=O)CCCCCNC(=O)CCCC[C@H]4[C@@H]5[C@H](CS4)NC(=O)N5)CO3)O)C)NC(=O)/C=C\[C@H](C)OC(=O)C
BGC0000354	Actinoplanes	friulimicin a	4	1288.67	512.63	-4.0056	17	15	NRP		1	0	0	0	33	C[C@@H]1[C@@H](C(=O)N2CCCC[C@@H]2C(=O)N[C@H](C(=O)N[C@H](C(=O)NCC(=O)N[C@H](C(=O)NCC(=O)N[C@@H](C(=O)N[C@@H](C(=O)N3CCC[C@H]3C(=O)N1)C(C)C)[C@@H](C)N)CC(=O)O)CC(=O)O)[C@H](C)C(=O)O)NC(=O)[C@H](CC(=O)N)NC(=O)C/C=C\CCCCCCC(C)C
BGC0000979	Aphanizomenon	cylindrospermopsin	1	415.116	177.18	-1.9049	9	5	NRP		0	0	0	0	3	C[C@H]1[C@H](C[C@@H]2C[C@@H](NC3=NC[C@H]1N23)[C@@H](C4=CC(=O)NC(=O)N4)O)OS(=O)(=O)O
BGC0001648	Streptomyces	lasalocid	1	590.382	133.52	5.84222	7	4	Polyketide		1	0	0	0	22	[H][C@@](C)(CCC1=C(C(O)=O)C(O)=C(C)C=C1)[C@]([H])(O)[C@]([H])(C)C(=O)[C@]([H])(CC)[C@@]1([H])O[C@@](CC)(C[C@@H]1C)[C@@]1([H])CC[C@](O)(CC)[C@H](C)O1
BGC0000784	Pseudomonas	o-antigen	1	-1					Saccharide		0	0	0	0	18
BGC0000831	Duganella	violacein	1	343.096	94.22	2.7501	3	4	Alkaloid		0	0	0	0	5	C1=CC=C2C(=C1)/C(=C\3/C=C(NC3=O)C4=CNC5=C4C=C(C=C5)O)/C(=O)N2
BGC0000737	Pasteurella	capsular polysaccharide	1	-1					Saccharide		0	0	0	0	6
BGC0001580	Kitasatospora	ebelactone	1	338.246	63.6	3.7687	4	1	Polyketide		1	0	0	0	36	CC[C@@H](C)[C@H]([C@H](C)C(=O)[C@H](C)/C=C(\C)/C[C@H](C)[C@H]1[C@@H](C(=O)O1)C)O
BGC0000904	Streptomyces	fr-900098	1	197.045	98.07	-0.2081	3	3	Other		1	0	0	0	11	CC(=O)N(O)CCCP(O)(O)=O
BGC0000029	Streptomyces	be-14106	1	423.277	69.56	5.0167	3	3	Polyketide	Cytotoxic	1	0	0	0	28	CCC\C=C\CC1C\C=C\C=C(/C)\C=C\C=C/C(O)C(O)\C=C(/C)\C=C\C=C\C(=O)N1
BGC0000603	Streptomyces	cyclothiazomycin	1	1472.29	471.47	0.1361	27	12	RiPP		1	0	0	0	21	[H][C@](C)(O)[C@]1([H])NC(=O)[C@@]2(C)NC(=O)\C(NC(=O)[C@]3([H])CSC(=N3)[C@]([H])(CC(N)=O)NC(=O)C3=CC=C(N=C3[C@@]([H])(C)NC(=O)[C@]3([H])CCCN3C(=O)\C(NC(=O)CNC1=O)=C\C)C1=NC(=CS1)C1=N[C@@]([H])(CS1)C(=O)NC(=C)C1=NC(=CS1)C1=NC(=CS1)C1=N[C@@]([H])(CS1)C(=O)N[C@@]([H])(CS2)C(O)=O)=C\C
BGC0001094	Burkholderia	enacyloxin iia	1	701.237	213.91	3.5969	10	6	NRP		0	0	0	0	24	CC\C=C\C(OC(N)=O)C(Cl)C(O)CC(=O)C(O)C(O)C(C)C(\Cl)=C\C=C\C=C(/C)\C=C\C=C\C(=O)O[C@@H]1C[C@H](CC[C@@H]1O)C(O)=O
BGC0000002	Kutzneria	aculeximycin	1	1672.97	584.47	-1.7007	35	22	Polyketide		1	0	0	0	34	CCCC(O[C@H]1C[C@](C)(N)[C@H](O)[C@H](C)O1)C(C)C(O)C(CC)\C=C\C(O)C(C)C1C\C=C(C)\C(O)C(C)C(CC(O)C(C)C(O)CC2CC(O)C(O)C(O)(CC(O[C@@H]3O[C@H](C)[C@@H](O)[C@H](O[C@H]4C[C@@H](N)[C@H](O)[C@@H](C)O4)[C@H]3O[C@@H]3O[C@H](C)[C@@H](O)[C@H](O)[C@H]3O)C(C)CCC(O)CC(O)C\C=C(CC)\C(=O)O1)O2)O[C@@H]1O[C@H](CO)[C@@H](O)[C@H](O)[C@@H]1O
BGC0001976	Phoma	eupenifeldin	1	-1					Terpene		2	0	0	0	11
BGC0001813	Streptomyces	tyrobetaine	1	-1					NRP		1	0	0	0	15
BGC0000156	Aspergillus	tan-1612	3	414.095	161.59	0.8345	9	5	Polyketide	Inhibitor	2	0	0	0	5	CC(=O)C1=C(C2(C(=O)C3=C(CC2(CC1=O)O)C=C4C=C(C=C(C4=C3O)O)OC)O)O
BGC0001043	Streptomyces	sgr ptms	1	-1					NRP		1	0	0	0	6
BGC0001409	Streptomyces	dutomycin	1	854.336	258.95	3.27032	17	5	Polyketide		1	0	0	0	49	CCC[C@@H](C)\C=C(\C)C(=O)OC1C(C)OC(CC1(C)O)OC1CCC(O[C@@H]2C(O)=C(C(C)=O)C(=O)[C@@]3(O)C(=O)C4=C(O)C5=C(C(C)=C4C[C@@]23O)C(=O)C(OC)=CC5=O)OC1C
BGC0000077	Hypomyces	hypothemycin	1	378.131	125.82	1.0269	8	3	Polyketide		2	0	0	0	10	CC1C/C=C\C(=O)C2C(O2)CC([C@H](C3=CC(=CC(=C3C(=O)O1)O)OC)O)O
BGC0000319	Streptomyces	cephamycin c	1	446.111	211.58	-1.6234	9	5	NRP	Antibacterial,Inhibitor	1	1	0	0	19	CO[C@]1(NC(=O)CCCC(N)C(O)=O)C2SCC(COC(N)=O)=C(N2C1=O)C(O)=O
BGC0001586	Pseudomonas	eps273	1	-1					Saccharide		0	0	0	0	17
BGC0000909	Streptomyces	melanin	1	318.064	99.86	1.32664	4	2	Other		1	0	0	0	5	CC1=C2C3=C(C4=CNC5=C(C(=O)C(=O)C(=C45)C3=CN2)C)C(=O)C1=O
BGC0000435	Pseudomonas	syringafactin	1	-1					NRP		0	0	0	0	6
BGC0001653	Microbispora	linfuranone b	2	-1					Polyketide		1	0	0	0	13
BGC0000906	Heliophilum	heme d1	1	710.131	251.83	-4.15538	13	0	Other		1	0	0	0	16	[H+].[H+].[H+].[H+].CC1=C(C2=CC3=NC(=CC4=NC(=C(C4(C)CC(=O)[O-])[O-])C=C5C(C(=O)C(=N5)C=C1[N-]2)(C)CC(=O)[O-])C(=C3/C=C/C(=O)[O-])C)CCC(=O)[O-].[Fe+2]
BGC0001310	Streptomyces	naringenin	1	272.068	86.99	2.5099	5	3	Terpene		1	0	0	0	2	C1C(OC2=CC(=CC(=C2C1=O)O)O)C3=CC=C(C=C3)O
BGC0000097	Streptomyces	ml-449	1	449.293	69.56	5.5729	3	3	Polyketide	Antibacterial,Antifungal	1	1	1	0	24	CCC/C=C/C=C/CC1C/C=C/C=C(/C=C/C=C/C(C(/C=C(/C=C/C=C/C(=O)N1)\C)O)O)\C
BGC0000886	Streptomyces	allylmalonyl-coa	1	-1					Other		1	0	0	0	10
BGC0001703	Nostoc	nocuolin a	1	298.226	62.13	3.4179	4	1	Other		0	0	0	0	22	CCCCC/C1=N/N(C(=O)CCO)OC(CCCCC)C1
BGC0000655	Streptomyces	siomycin	1	1647.46	562.74	0.509	31	17	Terpene		1	0	0	0	27	C/C=C/1\C2=NC(CS2)C(=O)NC(C3=NC(=CS3)C(=O)NC4C(OC(=O)C5=NC6=C(C=CC(C6O)NC(C(=O)NC(=C)C(=O)NC(=C)C(=O)NC(C(=O)NC7(CC(C8=CSC4=N8)N=C(C7)C9=NC(=CS9)C(=O)NC(=C)C(=O)NC(=C)C(=O)N)C2=NC(=CS2)C(=O)NC(C(=O)N1)C(C)O)C)C(C)C)C(=C5)C(C)O)C)C(C)(C(C)O)O
BGC0000679	Micromonospora	diazepinomicin	1	462.252	93.03	6.9264	5	4	Terpene		1	0	0	0	40	CC(C)=CCC\C(C)=C\CC\C(C)=C\CN1C2=C(NC3=C(C=CC=C3O)C1=O)C(O)=CC(O)=C2
BGC0001985	Streptomyces	pyrazomycin	1	-1					Other		1	0	0	0	24
BGC0001831	Myxococcus	alkylpyrone-407	2	406.308	67.51	7.05372	4	1	Polyketide		0	0	0	0	6	CC(C)CCCCCCCCCCCCCC(C(C)C(O1)=CC(O)=C(C)C1=O)=O
BGC0000414	Streptomyces	quinocarcin	1	330.158	62.24	1.1064	5	1	NRP		1	0	0	0	24	CN1[C@H]2C[C@H]([C@@H]1[C@@H]3CC4=C([C@H]5N3[C@@H]2OC5)C(=CC=C4)OC)C(=O)O
BGC0001888	Ustilago	mannosylerythritol lipid a	3	-1					Other		2	0	0	0	6
BGC0001153	Paenibacillus	polymyxin b	1	1202.75	490.66	-5.2448	18	18	NRP	Antibacterial	1	1	0	0	5	CCC(C)CCCCC(=O)N[C@@H](CCN)C(=O)N[C@@H]([C@@H](C)O)C(=O)N[C@@H](CCN)C(=O)N[C@H]1CCNC(=O)[C@@H](NC(=O)[C@@H](NC(=O)[C@@H](NC(=O)[C@@H](NC(=O)[C@H](NC(=O)[C@@H](NC1=O)CCN)CC2=CC=CC=C2)CC(C)C)CCN)CCN)[C@@H](C)O
BGC0000874	Streptomyces	blasticidin s	1	422.203	215.67	-2.21873	9	6	Other		1	0	0	0	28	CN(C(N)=N)CC[C@H](N)CC(N[C@H]1C=C[C@H](N2C=CC(N)=NC2=O)O[C@@H]1C(O)=O)=O
BGC0000917	Rhodobacter	molybdenum cofactor	1	520.877	211.62	-2.8064	14	4	Other		0	0	0	0	4	C(C1C(=C(C2C(O1)NC3=C(N2)C(=O)N=C(N3)N)[S-])[S-])OP(=O)([O-])[O-].O=[Mo+2]=O
BGC0000360	Streptomyces	ge81112	1	658.223	333.02	-3.8573	13	12	NRP		1	0	0	0	28	NC(=O)OCC(O)CC(NC(=O)C1NCCCC1O)C(=O)NC(CC1=CN=C(N)N1)C(=O)NC(C(O)C1=NC=C(Cl)N1)C(O)=O
BGC0000683	Streptomyces	avermitilol	1	222.198	20.23	3.4657	1	1	Terpene		1	0	0	0	1	[H][C@@]12CC[C@]3(C)[C@@H](O)CC[C@@H](C)[C@@]3([H])[C@]1([H])C2(C)C
BGC0001458	Salinispora	salinipostin g	1	444.264	71.06	7.0862	6	0	Other	Antimalarial	1	0	0	0	9	CCCCCCCCCCCCCCO[P@]1(=O)OC[C@@H]2COC(=O)C2=C(CCC)O1
BGC0001435	Streptomyces	ikarugamycin	1	478.283	95.5	4.0152	4	3	NRP	Antibacterial,Antifungal	1	1	1	0	25	[H][C@]12C[C@@H](C)[C@@H](CC)[C@]1([H])C=C[C@]1([H])[C@H]3C\C=C/C(=O)NCCC[C@@H]4NC(=O)C(=C4O)C(=O)\C=C\[C@@H]3C[C@]21[H]
BGC0001598	Streptomyces	foxicins a-d	1	-1					NRP		1	0	0	0	41
BGC0000378	Kutzneria	kutzneride 2	1	887.243	265.27	-0.0456	13	8	NRP		1	0	0	0	29	[H][C@@]12NC3=C(C=CC(Cl)=C3Cl)[C@]1(O)C[C@@H]1N2C(=O)[C@H](NC(=O)[C@H](COC)NC(=O)[C@@H]2C[C@@H](Cl)CNN2C(=O)[C@@H](OC(=O)[C@H](NC1=O)C1(C)CC1)C(C)(C)C)[C@@H](O)CC(O)=O
BGC0000447	Pseudomonas	tolaasin i	2	1986.21	717.36	-3.5153	27	24	NRP	Antifungal	0	0	1	0	10	CCCCCC(CC(=O)N/C(=C\C)/C(=O)N1CCC[C@@H]1C(=O)N[C@@H](CO)C(=O)N[C@@H](CC(C)C)C(=O)N[C@H](C(C)C)C(=O)N[C@H](CO)C(=O)N[C@H](CC(C)C)C(=O)N[C@H](C(C)C)C(=O)N[C@@H](C(C)C)C(=O)N[C@H](CCC(=O)N)C(=O)N[C@@H](CC(C)C)C(=O)N[C@H](C(C)C)C(=O)N/C(=C\C)/C(=O)N[C@@H]2[C@H](OC(=O)[C@@H](NC(=O)[C@H](NC(=O)[C@@H](NC(=O)[C@@H](NC2=O)[C@@H](C)CC)CCO)CCN)CCCCN)C)O
BGC0000793	Salmonella	lipopolysaccharide oligosaccharide	1	-1					Saccharide		0	0	0	0	10
BGC0001461	Amycolatopsis	nogabecin	1	-1					NRP	Antibacterial	1	1	0	0	36
BGC0000844	Streptomyces	clavulanic acid	1	199.048	87.07	-1.0956	4	2	Other		1	0	0	0	10	OC\C=C1\O[C@@H]2CC(=O)N2[C@H]1C(O)=O
BGC0001040	Streptomyces	rapamycin	1	913.555	195.43	6.1806	13	3	NRP		1	0	0	0	28	[H][C@@]12CC[C@@H](C)[C@@](O)(O1)C(=O)C(=O)N1CCCC[C@@]1([H])C(=O)O[C@@]([H])(CC(=O)[C@H](C)\C=C(C)\[C@@H](O)[C@@H](OC)C(=O)[C@H](C)C[C@H](C)\C=C\C=C\C=C(C)\[C@H](C2)OC)[C@H](C)C[C@@H]1CC[C@@H](O)[C@@H](C1)OC
BGC0000926	Bacillus	rhizocticin a	1	351.131	211.85	-2.11973	5	8	Other		1	0	0	0	31	N[C@@H](CCCNC(N)=N)C(=O)N[C@@H](\C=C/CP(O)(O)=O)C(O)=O
BGC0001504	Amycolatopsis	amycomicin	1	-1					Polyketide		1	0	0	0	8
BGC0001667	Fischerella	microcystin-lr	7	994.549	343.14	0.6184	11	10	NRP		0	0	0	0	10	C[C@H]1[C@@H](NC(=O)[C@@H](NC(=O)[C@H]([C@@H](NC(=O)[C@@H](NC(=O)[C@H](NC(=O)C(=C)N(C(=O)CC[C@@H](NC1=O)C(=O)O)C)C)CC(C)C)C(=O)O)C)CCCN=C(N)N)/C=C/C(=C/[C@H](C)[C@H](CC2=CC=CC=C2)OC)/C
BGC0000194	Streptomyces	actinorhodin	1	634.132	242.26	2.774	12	6	Polyketide	Antibacterial	1	1	0	0	22	C[C@@H]1C2=C(C3=C(C(=O)C=C(C3=O)C4=CC(=O)C5=C(C4=O)C(=C6[C@H](O[C@@H](CC6=C5O)CC(=O)O)C)O)C(=C2C[C@H](O1)CC(=O)O)O)O
BGC0001530	Streptomyces	bicyclomycin	1	302.111	148.35	-3.302	7	6	Other		1	0	0	0	8	[H][C@](O)([C@@](C)(O)CO)[C@@]12NC(=O)[C@@](O)(NC1=O)C(=C)CCO2
BGC0001883	Symbiodinium	porphyra-334	1	-1					Other		3	0	0	0	22
BGC0000569	Bacillus	plantazolicin	1	-1					RiPP	Antibacterial	1	1	0	0	12
BGC0000690	Streptomyces	hydroxystreptomycin	1	597.261	351.66	-8.76936	16	15	Saccharide		1	0	0	0	22	CN[C@H]1[C@H](O)[C@@H](O)[C@H](CO)O[C@H]1O[C@H]1[C@H](O[C@H]2[C@H](O)[C@@H](O)[C@H](NC(N)=N)[C@@H](O)[C@@H]2NC(N)=N)O[C@@H](CO)[C@]1(O)C=O
BGC0001224	uncultured	reductasporine	1	-1					Other		3	0	0	0	6
BGC0002012	Streptomyces	julichrome q3-3	2	-1					Polyketide		1	0	0	0	27
BGC0001716	Xenorhabdus	odilorhabdins	1	-1					NRP		0	0	0	0	15
BGC0000255	symbiont	pederin	1	503.309	124.94	1.3759	9	3	Polyketide		3	0	0	0	8	C[C@H]1[C@H](O[C@](CC1=C)([C@@H](C(=O)N[C@H]([C@@H]2C[C@H](C([C@H](O2)C[C@@H](COC)OC)(C)C)O)OC)O)OC)C
BGC0001819	Streptomyces	venemycin	1	-1					Polyketide		1	0	0	0	16
BGC0001795	Nostoc	swinholide a	1	1388.93	288.28	10.1082	20	8	Polyketide		0	0	0	0	7	C[C@@H]1O[C@H](C[C@@H](C1)OC)CC[C@@H]([C@H](O)[C@@H]([C@H]2OC(=O)/C=C\C(=C/C[C@@H](C[C@H]3O[C@H](C[C@@H]([C@H]([C@H](C[C@H]([C@@H]([C@H](OC(=O)/C=C\C(=C/C[C@@H](C[C@H]4O[C@H](C[C@@H]([C@H]([C@H](C[C@H]([C@@H]2C)O)O)C)OC)CC=C4)O)\C)[C@H]([C@@H](O)[C@H](CC[C@@H]5O[C@H](C[C@H](C5)OC)C)C)C)C)O)O)C)OC)CC=C3)O)\C)C)C
BGC0000701	Streptomyces	jinggangmycin	1	497.211	253.02	-6.7527	14	12	Saccharide		1	0	0	0	3	C1[C@@H]([C@H]([C@@H]([C@H]([C@H]1N[C@H]2C=C([C@H]([C@@H]([C@H]2O)O)O)CO)O)O)O[C@H]3[C@@H]([C@H]([C@@H]([C@H](O3)CO)O)O)O)CO
BGC0001951	Cylindrospermum	puwainaphycin f	2	-1					NRP		0	0	0	0	9
BGC0000941	Streptomyces	desferrioxamin b	1	560.353	205.84	0.9221	9	6	Other		1	0	0	0	5	CC(=O)N(O)CCCCCNC(=O)CCC(=O)N(O)CCCCCNC(=O)CCC(=O)N(O)CCCCCN
BGC0001465	Marinomonas	bromopyrroles/bromophenols	1	-1					Other		0	0	0	0	11
BGC0000972	Escherichia	n-myristoyl-d-asparagine	3	342.252	109.49	3.1323	3	3	NRP	Antibacterial,moderate antagonist of dopamine 5 and 5-hydroxytryptamine 7 receptors	0	1	0	0	23	CCCCCCCCCCCCCC(N[C@@H](C(O)=O)CC(N)=O)=O
BGC0001474	Streptomyces	thiopeptin	1	1668.45	539.55	1.36	31	18	RiPP	Antibacterial	1	1	0	0	22	C[C@H]([C@H](NC1=S)C2=NC([C@@H](N3)[C@](C4=NC(C(N[C@@](C(N/C(C5=N[C@@H](C(N[C@](C(C)(O)[C@@H](C)O)([H])C6=NC1=CS6)=O)CS5)=C\C)=O)([H])[C@@H](C)O)=O)=CS4)(NC([C@H](C)NC(C(NC([C@H](C)NC([C@H](C(C)C)N[C@@H]7C=CC8=C(N=C9C=C8[C@@H](O)C)[C@H]7O)=O)=O)=C)=O)=O)CC[C@@H]3C%10=NC(C(NC(C(NC(C(O)=O)=C)=O)=C)=O)=CS%10)=CS2)OC9=O
BGC0000624	Lactobacillus	salivaricin crl1328 α peptide	2	-1					RiPP		1	0	0	0	12
BGC0000570	Asticcacaulis	astexin-1	1	-1					RiPP		0	0	0	0	4
BGC0000496	Streptomyces	amfs	1	-1					RiPP		1	0	0	0	5
BGC0001262	Alternaria	ak-toxin i	1	413.184	105.23	2.7487	5	2	Polyketide		2	0	0	0	6	CC(C1=CC=CC=C1)C(C(=O)OC(/C=C/C=C\C=C\C(=O)O)C2(CO2)C)NC(=O)C
BGC0001507	Streptomyces	anantin c	1	-1					RiPP		1	0	0	0	4
BGC0000281	Pseudomonas	2,4-diacetylphloroglucinol	1	210.053	94.83	1.2086	5	3	Polyketide		0	0	0	0	8	CC(=O)C1=C(C(=C(C=C1O)O)C(=O)C)O
BGC0001526	Synechocystis	bartolosides e	7	-1					Other		0	0	0	0	10
BGC0001537	Streptomyces	butyrolactol a	1	526.314	167.91	1.2956	9	7	Polyketide		1	0	0	0	15	CC(CC=CC=CCCC=CC=CCCC(C)(C)C)C(O)C(O)C(O)C(O)C(O)C1OC(=O)C(O)C1O
BGC0000652	Streptomyces	napyradiomycin	1	480.147	83.83	6.0823	5	2	Terpene		1	0	0	0	26	CC(=CCC/C(=C/C[C@]12C(=O)C3=CC(=CC(=C3C(=O)[C@]1(C[C@H](C(O2)(C)C)Cl)Cl)O)O)/C)C
BGC0001151	Streptomyces	valclavam	2	329.159	142.19	-1.7527	6	4	Other	Antifungal,Inhibitor	1	0	1	0	14	CC(C)C(C(=O)NC(C(CC1CN2C(O1)CC2=O)O)C(=O)O)N
BGC0000106	Streptomyces	naphthomycin a	1	719.286	178.3	5.69032	9	5	Polyketide		1	0	0	0	32	C[C@H]1\C=C\C=C/C=C(C)\C(=O)NC2=C(Cl)C(=O)C3=C(C=C(C)C(O)=C3C(=O)\C(C)=C\[C@H](C)[C@@H](O)[C@@H](C)\C=C\[C@@H](O)C\C=C(C)\C(=O)C[C@@H]1O)C2=O
BGC0000713	Streptomyces	ribostamycin	1	454.227	262.38	-6.6523	14	10	Saccharide		1	0	0	0	26	C1[C@H]([C@@H]([C@H]([C@@H]([C@H]1N)O[C@@H]2[C@@H]([C@H]([C@@H]([C@H](O2)CN)O)O)N)O[C@H]3[C@@H]([C@@H]([C@H](O3)CO)O)O)O)N
BGC0000404	Penicillium	penicillin	1	356.081	89.54	-3.4699	5	1	NRP		2	1	0	0	16	CC1([C@@H](N2[C@H](S1)[C@@H](C2=O)NC(=O)CC3=CC=CC=C3)C(=O)[O-])C.[Na+]
BGC0001140	Streptomyces	platensimycin	2	441.179	133.16	3.2337	6	4	Terpene	Antibacterial,Inhibitor	1	1	0	0	36	[H][C@]12C[C@]3([H])O[C@@]1(C)C[C@@]1(C2)C=CC(=O)[C@@](C)(CCC(=O)NC2=C(O)C=CC(C(O)=O)=C2O)[C@]31[H]
BGC0000621	Escherichia	linaclotide	1	1525.39	573.91	-5.9392	26	19	RiPP		0	0	0	0	1	C[C@H]1C(=O)N[C@H]2CSSC[C@H]3C(=O)N[C@H](C(=O)N[C@H](C(=O)N[C@@H](CSSC[C@H](NC(=O)CNC(=O)[C@@H](NC2=O)[C@@H](C)O)C(=O)N[C@@H](CC4=CC=C(C=C4)O)C(=O)O)C(=O)N[C@@H](CSSC[C@@H](C(=O)N3)N)C(=O)N[C@H](C(=O)N5CCC[C@H]5C(=O)N1)CC(=O)N)CC6=CC=C(C=C6)O)CCC(=O)O
BGC0000374	Streptomyces	hormaomycin	7	1128.47	332.65	3.4038	15	7	NRP	Antibacterial,Signalling,active in vitro against lamaria parasite Plasmodium falciparum	1	1	0	0	23	CC[C@H](C)[C@@H](C(N1C[C@@H](/C=C\C)C[C@H]1C2=O)=O)NC([C@H]([C@@H](C3=CC=CC=C3)C)NC([C@H](NC([C@H]([C@H](C)C4=CC=CC=C4)NC([C@@H]([C@@H](C)O2)NC([C@H](C[C@H]5[C@H]([N+]([O-])=O)C5)NC(C6=CC=C(Cl)N6O)=O)=O)=O)=O)C[C@H]7[C@H]([N+]([O-])=O)C7)=O)=O
BGC0001885	Streptomyces	oxazolepoxidomycin a	1	-1					Polyketide		1	0	0	0	15
BGC0000327	Streptomyces	netropsin	1	430.219	208.93	-0.90666	7	8	NRP		1	0	0	0	22	CN1C=C(NC(=O)C2=CC(NC(=O)CNC(N)=N)=CN2C)C=C1C(=O)NCCC(N)=N
BGC0001786	Novosphingobium	subterisin	1	-1					RiPP		0	0	0	0	9
BGC0000037	Aspergillus	cichorine	1	193.074	58.56	0.95262	3	2	Polyketide		2	0	0	0	1	CC1=C(C=C2C(=C1OC)CNC2=O)O
BGC0000415	Streptomyces	quinomycin	1	1100.42	301.8	0.6353	18	4	NRP		1	0	0	0	17	CC1C(=O)N(C2CSC(C(C(=O)N(C(C(=O)OCC(C(=O)N1)NC(=O)C3=NC4=CC=CC=C4N=C3)C(C)C)C)N(C(=O)C(NC(=O)C(COC(=O)C(N(C2=O)C)C(C)C)NC(=O)C5=NC6=CC=CC=C6N=C5)C)C)SC)C
BGC0001290	Aspergillus	emericellamide a	2	609.41	171.8	1.9517	7	5	NRP		2	0	0	0	5	CCCCCC[C@H](C)[C@H]1OC(=O)[C@H](C)NC(=O)[C@H](C)NC(=O)[C@H](CC(C)C)NC(=O)[C@@H](NC(=O)CNC(=O)[C@@H]1C)C(C)C
BGC0001896	Streptomyces	carbazomycin b	1	-1					Other		1	0	0	0	7
BGC0000101	Aspergillus	emodin	3	270.053	94.83	1.88722	5	3	Polyketide	Inhibitor	2	0	0	0	2	CC1=CC(=C2C(=C1)C(=O)C3=CC(=CC(=C3C2=O)O)O)O
BGC0001865	Parastagonospora	elsinochrome c	1	548.168	151.98	3.2834	10	4	Polyketide	Cytotoxic	2	0	0	0	16	CC(C1C(C2=C(C(=C3C(=O)C=C(C4=C5C(=CC(=O)C6=C(C(=C1C(=C56)C2=C43)OC)O)OC)OC)O)OC)C(C)O)O
BGC0001300	Streptomyces	anthracimycin	1	396.23	63.6	5.102	4	1	Polyketide		1	0	0	0	15	[H][C@]12CC(C)=CC[C@]1([H])[C@@]1([H])\C(O)=C\C(=O)[C@@H](C)C(=O)O[C@H](C)\C=C\C=C/[C@@H](C)[C@@]1([H])C=C2
BGC0000851	Streptomyces	albonoursin	1	256.121	65.72	0.3285	2	2	Other		1	0	0	0	6	CC(C)\C=C1/NC(=O)\C(NC1=O)=C\C1=CC=CC=C1
BGC0001651	Tannerella	legionaminic acid	1	250.116	159.26	-3.0552	7	6	Other		0	0	0	0	12	C[C@H]([C@H]([C@H]1[C@@H]([C@H](C[C@](O1)(C(=O)O)O)O)N)N)O
BGC0001455	Streptomyces	antimycin	1	250.084	83.83	1.721	4	2	NRP		1	0	0	0	16	C[C@@H]1[C@H](OC=C2C1=C(C(=C(C2=O)C(=O)O)O)C)C
BGC0000775	Legionella	lipopolysaccharide	1	4897.15	1888.75	-9.9821	107	62	Saccharide		0	0	0	0	30	CCCCCCCCCCCCCCCC1[C@H](OC([C@H]([C@@H]1OC(=O)CC(CCCCCCCCCCC)O)O)CO[C@H]2[C@H](C([C@@H](C(O2)CO[C@@]3(CC([C@H](C(O3)C(CO)O)O[C@H]4[C@@H](C([C@@H](C(O4)C(CO)O)OP(=O)(O)OP(=O)(O)OCCN)O[C@@H]5[C@@H](C([C@@H](C(O5)C(CO[C@@H]6[C@@H](C([C@](CO6)(C(CO)O)O)O)O)O)OP(=O)(O)O)O[C@@H]7C(C([C@@H](C(O7)CO[C@@H]8C(C([C@H](C(O8)CO)O)O)O)O)O[C@@H]9C(C([C@H](C(O9)CO)O)O)O[C@@H]1C(C([C@@H](C(O1)CO)O[C@@H]1C(C([C@H](…
BGC0001969	Talaromyces	asperterpenoid a	1	-1					Terpene		2	0	0	0	3
BGC0000845	Streptomyces	clavulanic acid	1	199.048	87.07	-1.0956	4	2	Other	Inhibitor	1	0	0	0	24	C1[C@@H]2N(C1=O)[C@H](/C(=C/CO)/O2)C(=O)O
BGC0001377	Streptomyces	uncialamycin	1	439.106	119.39	1.2443	7	4	Polyketide		1	1	0	0	32	CC(O)[C@@]12O[C@@]11[C@H](O)C#C\C=C/C#C[C@@H]2NC2=C1C=C(O)C1=C2C(=O)C2=CC=CC=C2C1=O
BGC0000175	Streptomyces	cycloheximide	1	281.163	83.47	1.0415	4	2	Polyketide	Inhibitor	1	0	0	0	18	[H][C@@](O)(CC1CC(=O)NC(=O)C1)[C@@]1([H])C[C@@H](C)C[C@H](C)C1=O
BGC0001003	Kitasatospora	α-lipomycin	1	587.309	153.83	3.7781	8	4	NRP	Antibacterial	1	1	0	0	22	CC(C)C(O[C@H]1C[C@H](O)[C@H](O)[C@@H](C)O1)C(C)\C=C(C)\C=C\C=C\C=C\C=C\C(=O)C1=C(O)C(CCC(O)=O)N(C)C1=O
BGC0000405	Penicillium	δ-(l-α-aminoadipyl)-l-cysteine-d-valine	4	362.139	166.1	-4.1776	7	4	NRP		2	0	0	0	16	CC(C)[C@@H](NC(=O)[C@H](CS)NC(=O)CCC[C@H]([NH3+])C([O-])=O)C([O-])=O
BGC0001044	Leptosphaeria	sirodesmin pl	1	486.113	133.68	-0.3415	10	2	NRP		2	0	0	0	18	C[C@@H]1C(C(=O)[C@]2(O1)C[C@@H]3[C@]([C@@H]2OC(=O)C)(C[C@]45N3C(=O)[C@](N(C4=O)C)(SS5)CO)O)(C)C
BGC0000966	Actinoalloteichus	caerulomycin a	1	229.085	67.6	1.9603	5	1	NRP		1	0	0	0	25	COC1=CC(\C=N\O)=NC(=C1)C1=NC=CC=C1
BGC0001541	Cercospora	cercosporin	1	534.153	151.98	2.8991	10	4	Polyketide		2	0	0	0	16	COC1=C(C[C@H](C)O)C2=C3C(C[C@H](C)O)=C(OC)C(=O)C4=C3C3=C(OCOC5=C3C2=C(C(O)=C5)C1=O)C=C4O
BGC0001661	Streptomyces	mayamycin	1	463.163	136.32	2.83922	8	5	Polyketide		1	0	0	0	22	CN[C@@H]1C[C@@H](O[C@H](C)[C@H]1O)C1=C(O)C2=C(C(=O)C3=CC=CC(O)=C3C2=O)C2=C(O)C=C(C)C=C12
BGC0000208	Amycolatopsis	chelocardin	1	411.132	158.15	1.26504	8	5	Polyketide		1	0	0	0	18	[H][C@@]12CC3=C(C(O)=C4C(O)=C(C)C=CC4=C3C)C(=O)[C@]1(O)C(=O)C(C(C)=O)=C(O)[C@@H]2N
BGC0000998	Streptomyces	guadinomine	1	-1					NRP		1	0	0	0	26
BGC0001617	Stereum	hirsutene	1	204.188	0	4.415	0	0	Terpene		2	0	0	0	17	C[C@]12[C@H](CCC1=C)C[C@@H]3[C@H]2CC(C3)(C)C
BGC0000605	Streptomyces	ge37468	1	1308.25	389.5	5.70612	23	9	RiPP		1	0	0	0	13	CC1CC(O)N2C1C1=NC(=CS1)C1=NC(=CS1)C1=NC(=CC=C1C1=NC(=C(C)O1)C(=O)NC(CC(N)=O)C1=NC(=CS1)C(=O)NC(CC1=CC=CC=C1)C1=NC(CS1)C(=O)NC(CC1=CC=C(O)C=C1)C2=O)C1=NC(=CS1)C(=O)NC(=C)C(=O)NC(=C)C(O)=O
BGC0000531	Streptococcus	mutacin i	1	-1					RiPP		1	0	0	0	8
BGC0000317	Acremonium	cephalosporin c	1	415.105	176.33	-1.1297	8	4	NRP		2	0	0	0	7	CC(=O)OCC1=C(N2C(SC1)C(NC(=O)CCCC(N)C(O)=O)C2=O)C(O)=O
BGC0001301	Streptomyces	anthracimycin	1	-1					Polyketide		1	0	0	0	9
BGC0000087	Streptomyces	lasalocid	1	612.364	136.35	1.51152	8	3	Polyketide		1	0	0	0	57	CCC(C1C(CC(O1)(CC)C2CCC(C(O2)C)(CC)O)C)C(=O)C(C)C(C(C)CCC3=C(C(=C(C=C3)C)O)C(=O)[O-])O.[Na+]
BGC0001131	Xenorhabdus	ambactin	1	750.406	263.94	-1.1729	9	9	NRP	weakly bioactive against Trypanosoma brucei rhodesiense	0	0	0	0	8	CC(C)C[C@@H]1NC(=O)[C@@H](CC2=CC=CC=C2)NC(=O)[C@H](CCC(N)=O)NC(=O)[C@@H](CO)NC(=O)[C@H](CCCCN)NC(=O)[C@@H](CC2=CC=CC=C2)NC1=O
BGC0001380	Agrobacterium	salecan	1	-1					Saccharide		0	0	0	0	16
BGC0000034	Streptomyces	candicidin	1	1108.57	364.22	3.6124	19	11	Polyketide		1	0	1	0	21	CC1/C=C/C=C/C=C/C=C/C=C/C=C/C=C/C(CC(C(C(CC(=O)CC(CC(CC(CC(=O)CCCC(=O)CC(=O)OC1C(C)CC(C)C(CC(=O)C2=CC=C(C=C2)N)O)O)O)O)O)C(=O)O)O)OC3C(C(C(C(O3)C)O)N)O
BGC0001002	Streptomyces	jawsamycin	1	565.315	128.2	2.3602	6	4	NRP		1	0	0	0	13	C[C@@H]1C[C@H]1/C=C\[C@H]2C[C@@H]2[C@@H]3C[C@H]3[C@H]4C[C@H]4[C@@H]5C[C@@H]5/C=C/C=C/C(=O)NC[C@H]6[C@@H]([C@H]([C@@H](O6)N7CCC(=O)NC7=O)O)O
BGC0001027	Nocardia	nocobactin na	1	743.411	203.91	4.2123	11	5	NRP		1	0	0	0	8	CCCCCCCCCC(C(C)C(=O)NC1CCCCN(C1=O)O)OC(=O)C(CCCCN(C(=O)C)O)NC(=O)C2=C(OC(=C3C=CC=CC3=O)N2)C
BGC0001370	Streptomyces	lipopeptide 8d1-1	2	1502.55	666.88	-5.9578	23	23	NRP		1	0	0	0	44	CCCC1OC1C(=O)N[C@@H](CO)C(=O)N[C@@H]([C@@H](C)O)C(=O)N[C@@H](CC1=CNC2=C1C=CC=C2)C(=O)N[C@@H](CC(O)=O)C(=O)N[C@@H](CC(O)=O)C(=O)N[C@@H](C(=O)N[C@@H](CC(O)=O)C(=O)NCC(=O)N[C@H](C(O)CON)C(=O)N[C@@H](CCC(O)=O)C(=O)N[C@@H](CC1=CNC2=C1C=CC=C2)C(O)=O)C1=CC=C(O)C=C1
BGC0000801	Sinorhizobium	galactoglucan	1	-1					Saccharide		0	0	0	0	25
BGC0001527	Gelatoporia	basidioferrin	1	534.265	243.14	-1.5784	10	7	Other		2	0	0	1	1	CC(=O)N(O)CCCC(N)C(=O)NC(CCCN(O)C(C)=O)C(=O)NC(CCCN(O)C(C)=O)C(=O)O
BGC0000989	Sorangium	epothilone	1	507.265	109.25	4.47752	8	2	NRP		0	0	0	0	7	C[C@H]1CCC[C@@]2([C@@H](O2)C[C@H](OC(=O)C[C@@H](C(C(=O)[C@@H]([C@H]1O)C)(C)C)O)/C(=C/C3=CSC(=N3)C)/C)C
BGC0001215	Streptomyces	conglobatin	1	498.273	104.66	5.5022	8	0	NRP		1	0	0	0	19	C[C@@H]1C[C@H](C)[C@H](CC2=CN=CO2)OC(=O)\C(C)=C/[C@H](C)C[C@H](C)[C@H](CC2=CN=CO2)OC(=O)\C(C)=C/1
BGC0001654	Bacteroides	lipooligosaccharide	1	-1					Saccharide		0	0	0	0	18
BGC0001892	Botrytis	botcinic acid	1	-1					Polyketide		2	0	0	0	18
BGC0001811	Fusarium	trichodiene-11-one	1	-1					Terpene		2	0	0	0	11
BGC0000495	Actinoplanes	actagardine	1	1752.98	660.44	-4.2317	22	23	RiPP		1	0	0	0	32	CC[C@H](C)[C@@H](C(=O)N[C@H](CCC(=O)O)C(=O)N[C@H](CC)C(=O)N[C@H](C)C(=O)N[C@@H](C(C)C)C(=O)N[C@H](CC1=CNC2=CC=CC=C21)C(=O)NCC(=O)N[C@H](CO)C(=O)N[C@H](C)C(=O)NCC(=O)N[C@H](CC)C(=O)N[C@@H](C(C)C)C(=O)N[C@@H]([C@@H](C)CC)C(=O)N[C@H](C)C(=O)N[C@@H](C)C(=O)N[C@H](C)C(=O)O)NC(=O)[C@@H](CC)NC(=O)[C@H](CC(C)C)NC(=O)[C@@H](C)N
BGC0001372	Penicillium	penigequinolone a	1	467.231	97.25	4.2123	6	3	Terpene		2	0	0	0	14	CC1(CCC(OC1)(C)/C=C/C2=C(C3=C(C=C2)NC(=O)C(C3(C4=CC=C(C=C4)OC)O)OC)O)C
BGC0000375	Streptomyces	indigoidine	1	248.055	144.38	-2.719	6	4	NRP		1	0	0	0	5	C\1=C(C(=O)NC(=O)/C1=C/2\C=C(C(=O)NC2=O)N)N
BGC0000017	[Oscillatoria]	anatoxin-a	2	165.115	29.1	1.4162	2	1	Polyketide	Neurotoxic	0	0	0	0	15	CC(=O)C1=CCC[C@@H]2CC[C@H]1N2
BGC0000897	Streptomyces	dehydrophos	1	-1					Other		1	0	0	0	17
BGC0000731	Klebsiella	capsular polysaccharide	1	1004.31	523.2	-14.0081	31	20	Saccharide		0	0	0	0	15	C(C1C(C(C(C(O1)OC2C(C(OC(C2OC3C(C(C(C(O3)C(=O)O)OC4C(C(C(C(O4)CO)O)O)O)O)O)OC5C(OC(C(C5O)O)OCC6C(C(C(C(O6)O)O)O)O)CO)CO)O)O)O)O)O
BGC0001649	Streptomyces	lavendiol	1	-1					Polyketide		1	0	0	0	31
BGC0000371	Rhodococcus	heterobactin a	2	615.229	276.24	-1.2551	10	10	NRP		1	0	0	0	11	NC(NCCC[C@@H](NC(=O)C1=C(O)C(O)=CC=C1)C(=O)NCC(=O)N[C@H]1CCCN(O)C1=O)=NC(=O)C1=CC=CC(O)=C1O
BGC0000648	Myxococcus	carotenoid	1	738.674	99.38	11.5564	6	4	Terpene		0	0	0	0	11	C[C@H](CCCCC(C)CCC[C@@H](C)CCCC(C)CCC=C(C)C)CCC[C@H](C)CCC[C@H](C)CCCC(C)(C)O[C@@H]1[C@@H]([C@H]([C@@H]([C@H](O1)CO)O)O)O
BGC0001000	Lyngbya	hectochlorin	1	664.108	151.21	5.7338	13	1	NRP	Antifungal,Cytotoxic	0	0	1	0	8	C[C@H]1[C@H](CCCC(C)(Cl)Cl)OC(=O)C2=CSC(=N2)[C@@H](OC(C)=O)C(C)(C)OC(=O)C2=CSC(=N2)[C@@H](OC1=O)C(C)(C)O
BGC0001427	Myxococcus	myxochromide a	1	845.469	226.41	2.5098	9	5	NRP		0	0	0	0	22	CN([C@H]1[C@@H](C)OC(=O)CC[C@H](NC(=O)[C@H](NC(=O)[C@H]2CCCN2C(=O)[C@H](CC(C)C)NC(=O)[C@@H](NC1=O)C)C)C(=O)N)C(=O)/C=C/C=C/C=C/C=C/C=C/C=C/C=C/C=C/C
BGC0000056	Actinomadura	esperamicin	1	1324.41	326.54	3.4164	28	8	Polyketide		1	0	0	0	3	CC1C(C(C(C(O1)OC2C#C/C=C/C#CC\3(C(C(=O)C(=C2/C3=C/CSSSC)NC(=O)OC)OC4CC(C(C(O4)C)O)OC(=O)C5=CC(=C(C=C5NC(=O)C(=C)OC)OC)OC)O)OC6CC(C(CO6)NC(C)C)OC)O)NOC7CC(C(C(O7)C)SC)O
BGC0000470	Streptomyces	bottromycin d	1	794.415	200.29	2.841	11	5	RiPP		1	0	0	0	11	C[C@@H]1CCN2[C@@H]1C(=O)N[C@H](C(=O)N[C@H](C(=NCC2=O)N[C@H](C(=O)N[C@@H]([C@@H](C)C3=CC=CC=C3)C(=O)N[C@H](CC(=O)OC)C4=NC=CS4)C(C)(C)C)C(C)(C)C)C
BGC0000395	Nocardia	nocardicin a	1	500.154	212.08	-0.0958	9	6	NRP		1	0	0	0	14	NC(CCOC1=CC=C(C=C1)C(=NO)C(=O)NC1CN(C(C(O)=O)C2=CC=C(O)C=C2)C1=O)C(O)=O
BGC0001673	Streptomyces	moomysin	1	2686.03	1005.79	-3.1906	32	37	RiPP		1	0	0	0	4	C1[C@H](NC(=O)[C@@H](NC(=O)[C@@H](NC(=O)[C@@H](NC(=O)CNC(=O)[C@@H](NC(=O)[C@@H](NC(=O)[C@@H](NC(=O)[C@@H](NC1=O)CO)CC2=CC=C(C=C2)O)CC3=CN=CN3)CC4=CNC5=CC=CC=C54)CC(=O)O)CC6=CC=C(C=C6)O)CC7=CN=CN7)C(=O)N[C@@H](CC8=CNC9=CC=CC=C98)C(=O)N[C@@H](CC1=CN=CN1)C(=O)N[C@@H](CC1=CN=CN1)C(=O)NCC(=O)N[C@@H](CC1=CNC2=CC=CC=C21)C(=O)N[C@@H](CC1=CC=C(C=C1)O)C(=O)NCC(=O)N[C@@H](CC1=CNC2=CC=CC=C21)C(=O)N[C@@H](CC1…
BGC0001776	Penicillium	shearinine d	1	599.325	101.01	5.9563	6	3	Terpene		2	0	0	0	22	[H][C@]12CC3=C(NC4=CC5=C(C=C34)[C@@H](O)[C@@]3([H])C5=CC(C)(C)OC3(C)C)[C@]1(C)[C@@]1(C)CC[C@@]34O[C@@]([H])(C(=O)C=C3[C@]1(O)CC2)C(C)(C)O4
BGC0000265	Streptomyces	rhodomycin	1	700.321	198.92	2.091	14	6	Polyketide		1	1	0	0	12	CC[C@]1(C[C@@H](C2=C(C3=C(C(=C2[C@H]1OC4CC(C(C(O4)C)O)N(C)C)O)C(=O)C5=C(C3=O)C(=CC=C5)O)O)OC6CC(C(C(O6)C)O)N(C)C)O
BGC0001102	Burkholderia	malleilactone	1	306.183	63.6	4.5251	4	1	NRP	Siderophore	0	0	0	1	13	CCCCCCC\C=C(/C)\C(\O)=C1/C=C(OC1=O)C(=O)CC
BGC0001048	Streptoalloteichus	tallysomycin a	1	1730.74	825.41	-11.2577	41	28	NRP	Cytotoxic	1	0	0	0	40	CC1C(C(C(C(O1)OC(C(C2=NC(=CS2)C3=NC(=CS3)C(=O)NCCCC(CC(=O)NCCCNCCCCN)N)O)NC(=O)C(C(C)O)NC(=O)CC(C(C)NC(=O)C(C(C4=CN=CN4)OC5C(C(C(C(O5)CO)O)O)OC6C(C(C(C(O6)CO)O)OC(=O)N)O)NC(=O)C7=C(C(=NC(=N7)C(CC(=O)N)NCC(C(=O)N)N)N)C)O)O)O)N
BGC0001197	Frankia	frankiamicin	1	448.079	172.59	2.54752	8	6	Polyketide		1	0	0	0	14	O=C1C2=C(C(O)=C(CC(O)C3=C4C(O)=C(C(O)=O)C(C)=C3)C4=C2)C(C5=C1C=C(O)C=C5O)=O
BGC0001674	Streptomyces	ms-271	1	-1					RiPP		1	0	0	0	14
BGC0000398	Pseudomonas	orfamide b	1	1280.82	415.29	1.7974	16	14	NRP		0	0	0	0	10	CCCCCCCCCCCC(O)CC(=O)NC(CC(C)C)C(=O)NC(CCC(O)=O)C(=O)NC1C(C)OC(=O)C(NC(=O)C(CO)NC(=O)C(CC(C)C)NC(=O)C(CC(C)C)NC(=O)C(CO)NC(=O)C(CC(C)C)NC(=O)C(NC1=O)C(C)C)C(C)C
BGC0001181	Streptomyces	geosmin	1	182.167	20.23	3.1178	1	1	Terpene		1	0	0	0	1	C[C@H]1CCC[C@@]2([C@@]1(CCCC2)O)C
BGC0000517	Bacillus	haloduracin β	2	2330.05					RiPP	Antibacterial,Inhibitor	1	1	0	0	5
BGC0000581	Escherichia	microcin j25	1	2106.02	740.42	-6.0086	27	25	RiPP		0	0	0	0	4	CCC(C)C1NC(=O)CNC(=O)C(NC(=O)C(CC2=CC=CC=C2)NC(=O)C(CC2=CC=C(O)C=C2)NC(=O)C(CCC(O)=O)NC(=O)C2CCCN2C(=O)C(NC(=O)C(CC2=CN=CN2)NC(=O)CNC(=O)C(C)NC(=O)CNC(=O)CNC(=O)CNC(=O)C(CC2=CC=C(O)C=C2)NC(=O)C(CC2=CC=CC=C2)NC(=O)C(CO)NC(=O)C(NC(=O)C2CCCN2C(=O)C(NC(=O)CNC1=O)C(C)O)C(C)CC)C(C)C)C(C)C
BGC0000948	Bacteroides	α-galactosylceramide	1	857.732	168.94	10.483	9	7	Other	agonist of CD1d-restricted natural killer T (iNKT) cells	0	0	0	0	2	CCCCCCCCCCCCCCCCCCCCCCCCCC(=O)N[C@@H](CO[C@@H]1[C@@H]([C@H]([C@H]([C@H](O1)CO)O)O)O)[C@@H]([C@@H](CCCCCCCCCCCCCC)O)O
BGC0002014	Actinobacteria	pepticinnamin e	1	-1					NRP		1	0	0	0	30
BGC0001010	Melittangium	melithiazol a	1	422.133	70.01	4.2732	8	0	NRP	Antifungal,Cytotoxic	0	0	1	0	19	COC(\C=C\C1=CSC(=N1)C1CSC(=N1)C(C)=C)C(C)C(\OC)=C/C(=O)OC
BGC0000024	Streptomyces	aureothin	1	397.153	91.81	5.01234	6	0	Polyketide	Antibacterial,Antifungal,Cytotoxic,insecticide	1	1	1	0	9	CC1=C(OC(=C(C1=O)C)OC)[C@H]2CC/C(=C/C(=C/C3=CC=C(C=C3)[N+](=O)[O-])/C)/O2
BGC0001045	Pseudomonas	spiruchostatin a	1	473.165	133.83	0.5245	8	4	NRP	Antifungal,Cytotoxic,Inhibitor	0	0	1	0	16	[H][C@]12CSSCC\C=C\C(CC(=O)N[C@H](C)C(=O)N1)OC(=O)CC(O)C(NC2=O)C(C)C
BGC0001246	Sarocladium	trans-resorcylide	1	290.115	83.83	2.4948	5	2	Polyketide		2	0	0	0	6	C[C@H]1CCC/C=C/C(=O)CC2=CC(=CC(=C2C(=O)O1)O)O
BGC0001750	Nannocystis	pyrronazol b	1	348.088	77.35	3.9809	5	1	NRP		0	0	0	0	22	COC1=CC(=O)O[C@H]([C@H]1C)C1=COC(=N1)C(\C)=C\C1=CC=C(Cl)N1
BGC0000510	Staphylococcus	epilancin k7	1	-1					RiPP		1	0	0	0	3
BGC0001260	Tolypocladium	terpendole e	1	437.293	65.48	5.1036	3	3	Terpene		2	0	0	0	7	[H][C@]12CC3=C(NC4=CC=CC=C34)[C@]1(C)[C@@]1(C)CC[C@]3([H])O[C@@H](C[C@@H](O)[C@@]3(C)[C@]1([H])CC2)C(C)(C)O
BGC0001456	Streptomyces	isorenieratene	1	-1					Terpene		1	0	0	0	8
BGC0002005	Xanthomonas	raxx	1	-1					RiPP		0	0	0	0	5
BGC0000798	Sorghum	dhurrin	1	311.101	143.4	-1.22662	8	5	Saccharide		3	0	0	0	5	C1=CC(=CC=C1[C@@H](C#N)O[C@H]2[C@@H]([C@H]([C@@H]([C@H](O2)CO)O)O)O)O
BGC0001519	Streptomyces	aurantimycin a	1	856.454	289.18	-1.7001	16	8	NRP		1	0	0	0	33	COC[C@@H]1N(O)C(=O)[C@H]2CCCNN2C(=O)[C@@H](NC(=O)[C@](C)(O)[C@]2(O)CC[C@@H](CC(C)C)[C@H](C)O2)[C@@H](OC(=O)[C@@H](C)N(O)C(=O)[C@@H]2CCCNN2C(=O)CNC1=O)C(C)C
BGC0001095	Bacillus	fengycin	1	1462.8	512.91	1.0835	19	16	NRP	Antifungal	1	0	1	0	15	CCCCCCCCCCCCCC(CC(=O)NC(CCC(=O)O)C(=O)NC(CCCN)C(=O)NC1CC2=CC=C(C=C2)OC(=O)C(NC(=O)C(NC(=O)C(NC(=O)C3CCCN3C(=O)C(NC(=O)C(NC(=O)C(NC1=O)C(C)O)CCC(=O)O)C)CCC(=O)N)CC4=CC=C(C=C4)O)C(C)CC)O
BGC0000376	Streptomyces	jbir-34	2	480.141	162.48	0.44762	8	5	NRP		1	0	0	0	24	C[C@@H](NC(=O)[C@@]1(C)COC(=N1)C1=CN(C)C2=CC(Cl)=C(C)C(O)=C12)C(=O)N[C@@H](CO)C(O)=O
BGC0001413	Cystobacter	cystobactamide	1	-1					NRP		0	0	0	0	24
BGC0000819	Penicillium	paraherquamide	1	493.258	91.34	2.7961	6	2	NRP		2	0	0	0	15	CN1C(=O)[C@]23C[C@H]4C(C)(C)[C@@]5(C[C@]14CN2CC[C@@]3(C)O)C(=O)NC1=C2OC=CC(C)(C)OC2=CC=C51
BGC0001963	Catenulispora	catenulisporolides	1	-1					NRP		1	0	0	0	56
BGC0001503	Amycolatopsis	amycolamycin a	2	-1					Polyketide		1	0	0	0	70
BGC0000159	Streptomyces	tautomycin	1	766.45	192.19	4.7853	13	3	Polyketide	Inhibitor	1	0	0	0	29	C[C@@H]1CC[C@@]2(CC[C@@H]([C@@H](O2)[C@H](C)CC[C@@H]([C@H](C)C(=O)C[C@H]([C@@H]([C@@H](C(C)C)OC(=O)C[C@H](C3=C(C(=O)OC3=O)C)O)OC)O)O)C)O[C@H]1CC[C@H](C)C(=O)C
BGC0001863	Bacillus	bacillicn cer074	1	-1					RiPP	Antibacterial	1	1	0	0	13
BGC0001610	Streptomyces	gougerotin	1	443.176	244.15	-5.8887	12	8	Other		1	0	0	0	15	CNCC(=O)NC(CO)C(=O)NC1C(C(C(OC1C(=O)N)N2C=CC(=NC2=O)N)O)O
BGC0000642	Enterobacteriaceae	carotenoid	1	738.674	99.38	11.5564	6	4	Terpene		0	0	0	0	7	C[C@H](CCCCC(C)CCC[C@@H](C)CCCC(C)CCC=C(C)C)CCC[C@H](C)CCC[C@H](C)CCCC(C)(C)O[C@@H]1[C@@H]([C@H]([C@@H]([C@H](O1)CO)O)O)O
BGC0001029	Nostoc	nostophycin	1	888.475	269.67	-0.2735	10	8	NRP		0	0	0	0	11	CC[C@@H](C)[C@H]1NC(=O)[C@H](CC2=CC=CC=C2)NC(=O)[C@@H]2CCCN2C(=O)CNC(=O)[C@@H](CCC(N)=O)NC(=O)[C@@H](O)[C@@H](C[C@H](O)CCCC2=CC=CC=C2)NC(=O)[C@@H]2CCCN2C1=O
BGC0000231	Streptomyces	griseusin	1	-1					Polyketide		1	0	0	0	5
BGC0001823	Streptomyces	weishanmycin	1	-1					NRP		1	0	0	0	31
BGC0001961	Streptomyces	ashimides	1	-1					NRP		1	0	0	0	25
BGC0000386	Burkholderia	malleobactin a	4	636.271	332.96	-5.467	13	10	NRP	Siderophore	0	0	0	1	27	NCCCCNC(=O)[C@H](CCCN(O)C=O)NC(=O)[C@H](CO)NC(=O)[C@H](NC(=O)[C@H](CCCN(=O)=O)NC=O)[C@@H](O)C(O)=O
BGC0000443	Pseudomonas	thanamycin	1	1338.6	534.19	-2.9789	21	19	NRP	Antifungal	0	0	1	0	11	CCCCCCCCCCCCC(C(CC(=O)NC1COC(=O)C(NC(=O)C(NC(=O)/C(=C\C)/NC(=O)C(CC(=O)C(NC(=O)C(NC(=O)C(NC(=O)C(NC1=O)(CCCN)O)CC(=O)O)CCO)CC2=C3C=CNC3=CC=C2)C(C)O)C(C(=O)O)O)C(CCl)O)O)O
BGC0001249	Alternaria	dimethylcoprogen	1	807.323	258.31	0.7541	13	4	NRP		2	0	0	1	1	C/C(=C/C(=O)N(CCCC1C(=O)NC(C(=O)N1)CCCN(C(=O)/C=C(/C)\CCOC(=O)C(CCCN(C(=O)/C=C(\C)/CCO)[O-])N(C)C)[O-])[O-])/CCO.[Fe+3]
BGC0000995	Pseudomonas	fr901464	1	507.283	126.85	2.3124	8	3	NRP		0	0	0	0	20	CC(OC(C)=O)\C=C/C(=O)NC1CC(C)C(C\C=C(/C)\C=C\C2OC(C)(O)CC3(CO3)C2O)OC1C
BGC0000661	Nostoc	geosmin	1	182.167	20.23	3.1178	1	1	Terpene	Odorous metabolite	0	0	0	0	3	C[C@@H]1CCC[C@]2(C)CCCC[C@@]12O
BGC0000040	Streptomyces	concanamycin a	1	865.519	225.92	4.9839	14	6	Polyketide		1	0	0	0	28	[H][C@@]1(OC(=O)\C(OC)=C\C(\C)=C\[C@@H](C)[C@@H](O)[C@@H](CC)[C@@H](O)[C@H](C)C\C(C)=C\C=C\[C@@H]1OC)[C@@H](C)[C@@H](O)[C@H](C)[C@@]1(O)C[C@@H](O[C@H]2C[C@@H](O)[C@H](OC(N)=O)[C@@H](C)O2)[C@H](C)[C@H](O1)\C=C\C
BGC0001344	Cystobacter	tubulysin a	9	843.445	204.77	5.7101	12	4	NRP		0	0	0	0	17	CCC(C)C(NC(=O)C1CCCCN1C)C(=O)N(COC(=O)CC(C)C)C(CC(OC(C)=O)C1=NC(=CS1)C(=O)NC(CC(C)C(O)=O)CC1=CC=C(O)C=C1)C(C)C
BGC0000254	Streptomyces	oxytetracycline	1	460.148	201.85	-1.4002	11	7	Polyketide		1	0	0	0	20	C[C@@]1([C@H]2[C@@H]([C@H]3[C@@H](C(=O)/C(=C(\N)/O)/C(=O)[C@]3(C(=O)C2=C(C4=C1C=CC=C4O)O)O)N(C)C)O)O
BGC0001800	Candidatus	theonellamide	1	1762.6	716.08	-12.6748	29	25	NRP		0	0	0	0	15	C[C@H]([C@H]1C(=O)NC[C@@H](C(=O)N[C@@H](C[C@H](CC(=O)N[C@H]2CC3=CN(C[C@H](C(=O)N[C@H](C(=O)N[C@H](C(=O)N1)[C@H](C(=O)N)O)CC(=O)N)NC(=O)[C@@H](NC(=O)C[C@H](NC(=O)[C@@H](NC(=O)[C@@H](NC(=O)[C@@H](NC2=O)[C@H](C)O)CO)CC4=CC=CC=C4)[C@H](/C=C(\C)/C=C/C5=CC=CC=C5)O)CO)C=[N+]3[C@H]6[C@@H]([C@H]([C@H]([C@H](O6)CO)O)O)O)O)C(=O)[O-])O)C7=CC=C(C=C7)Br
BGC0001939	Streptomyces	streptoseomycin	1	-1					Polyketide		1	1	0	0	41
BGC0001510	Streptomyces	anisomycin	1	265.131	67.79	0.5021	5	2	Other		1	0	0	0	13	COC1=CC=C(C[C@H]2NC[C@H](O)[C@H]2OC(C)=O)C=C1
BGC0001167	Microcystis	piricyclamide	1	-1					RiPP		0	0	0	0	12
BGC0001303	Micromonospora	lobosamide a	3	483.298	110.02	3.5944	5	5	Polyketide		1	0	0	0	46	C[C@H]1CC=CC=C(C)C=C(C)C=C\C=C/[C@H](O)C[C@H](O)[C@@H](O)[C@H](O)[C@@H](C)C=CC=CC=CC(=O)N1
BGC0000229	Streptomyces	grincamycin	1	938.394	249.34	3.8426	18	4	Polyketide	Cytotoxic	1	0	0	0	34	C[C@@H]1O[C@H](CC[C@@H]1O[C@H]1CCC(=O)[C@H](C)O1)O[C@@H]1[C@@H](C)O[C@H](C[C@H]1O)C1=CC=C2C(=O)C3=C(C=C[C@]4(O)C[C@](C)(CC(=O)[C@]34O)O[C@H]3CC[C@H](O[C@H]4CCC(=O)[C@H](C)O4)[C@H](C)O3)C(=O)C2=C1O
BGC0001810	Polymorphospora	trehangelin	1	506.2	201.67	-2.363	13	6	Polyketide		1	0	0	0	12	C/C=C(\C)/C(=O)O[C@H]1[C@@H]([C@H](O[C@@H]([C@@H]1O)O[C@@H]2[C@H](O[C@@H]([C@@H]([C@H]2O)O)OC(=O)/C(=C/C)/C)CO)CO)O
BGC0001422	Myxococcus	myxochromide a	1	833.469	226.41	2.3437	9	5	NRP		0	0	0	0	24	CC\C=C\C=C\C=C\C=C\C=C\C=C\C=C\C(=O)N(C)[C@H]1[C@@H](C)OC(=O)[C@H](CCC(N)=O)NC(=O)C(C)NC(=O)[C@H]2CCCN2C(=O)[C@H](CC(C)C)NC(=O)C(C)NC1=O
BGC0000064	Fusarium	fusarin	1	387.205	99.16	2.2552	5	3	Polyketide		2	0	0	0	1	C/C=C(/C)\C=C(/C)\C=C(/C)\C=C\C=C(/C)\C(=O)[C@@]12[C@@H](O1)[C@](NC2=O)(CCO)O
BGC0000084	Streptomyces	laidlomycin	1	698.424	170.44	4.1896	11	4	Polyketide		1	0	0	0	32	CCC(=O)OC(C(C)C1OC2(CCC(C)(O2)C2CCC(C)(O2)C2OC(CC2C)C2OC(O)(CO)C(C)CC2C)CC(O)C1C)C(C)C(O)=O
BGC0000127	Pseudomonas	pyoluteorin	1	270.98	73.32	2.9637	3	3	Polyketide		0	0	0	0	18	OC1=CC=CC(O)=C1C(=O)C1=CC(Cl)=C(Cl)N1
BGC0000608	Actinokineospora	nocathiacin	1	1550.27	477.29	3.1554	32	11	RiPP		1	0	0	0	4	C[C@H]1[C@H]([C@@](C[C@@H](O1)O[C@H]2[C@@H]3[C@H]4C5=NC(=CS5)C(=O)N[C@@H](COC(=O)C6=C(CO3)C7=C(COC2=O)C=CC=C7N6O)C8=NC(=CS8)C9=N/C(=C/1\NC(=CS1)C(=O)NC(=C)C(=O)N)/C(=O)C=C9C1=NC(=CS1)C(=O)N[C@H](C(=O)N/C(=C(\C)/OC)/C1=NC(=CS1)C(=O)N4)[C@@H](C)O)(C)O)N(C)C.C(=O)(C(F)(F)F)O
BGC0001932	Kitasatospora	mediomiycin a	1	-1					Polyketide		1	0	0	0	25
BGC0001854	Trichoderma	tricholignan a	1	-1					Polyketide	Iron reducing	2	0	0	0	8
BGC0000500	Carnobacterium	carnolysin a1	2	-1					RiPP		1	0	0	0	7
BGC0000331	Planktothrix	cyanopeptin	1	-1					NRP		0	0	0	0	4
BGC0000725	Pseudomonas	alginate	1	396.091	207.33	-6.5738	13	4	Saccharide		0	0	0	0	12	COC1C(C(C(OC1C(=O)[O-])OC2C(C(C(OC2C(=O)[O-])OC)O)O)O)O
BGC0000901	Aspergillus	ferrichrome	1	739.234	304.71	-3.82	12	6	Other		2	0	0	1	3	CC(=O)N(CCCC1C(=O)NC(C(=O)NC(C(=O)NCC(=O)NCC(=O)NCC(=O)N1)CCCN(C(=O)C)[O-])CCCN(C(=O)C)[O-])[O-].[55Fe+3]
BGC0000082	Actinomadura	kijanimicin	1	1316.67	347.75	5.4539	24	7	Polyketide		1	0	0	0	43	C[C@H]1C[C@@H]([C@@H]([C@@H]2[C@@H]1[C@]3([C@@H](C=C2)/C(=C\C[C@@H](/C(=C/[C@@H]4C=C([C@@H](C[C@@]45C(=O)C(=C(O5)O)C3=O)C)CO)/C)O[C@H]6C[C@]([C@H]([C@H](O6)C)NC(=O)OC)(C)[N+](=O)[O-])/C)C)O[C@H]7C[C@H]([C@H]([C@@H](O7)C)O)O[C@H]8C[C@H]([C@H]([C@@H](O8)C)O[C@@H]9C[C@H]([C@H]([C@@H](O9)C)OC)O)O[C@H]1C[C@H]([C@H]([C@@H](O1)C)O)O)C
BGC0002003	[Polyangium]	glidopeptin a	1	-1					NRP		0	0	0	0	8
BGC0000668	Hapalosiphon	12-epi-hapalindole c isonitrile	12	304.194	20.15	5.71779	0	1	Terpene		0	0	0	0	30	CC(=C)[C@H]1CC[C@@](C)(C=C)[C@H]([N+]#[C-])[C@@H]1C1=CNC2=C1C=CC=C2
BGC0000984	Delftia	delftibactin a	2	1032.48	522.52	-9.1128	19	18	NRP		0	0	0	0	7	C/C=C(/C(=O)NC(CCCN(C=O)O)C(=O)NC(CO)C(=O)NC(CCCN=C(N)N)C(=O)NC1CCCN(C1=O)O)\NC(=O)CNC(=O)C(C(C)O)NC(=O)C(C(C(=O)O)O)NC(=O)C(C)C(C(C)N)O
BGC0001708	Aspergillus	novofumigatonin	1	460.21	97.36	2.8829	8	0	Polyketide		2	0	0	0	13	C[C@H]1CCC2[C@@]([C@]13C[C@]4([C@@H]([C@@H]5[C@H]6[C@](OC5=O)(O[C@@]4(O6)O3)C)C)C)(C=CC(=O)OC2(C)C)C=O
BGC0001296	Streptomyces	streptazone e	1	187.1	29.1	1.8752	2	1	Polyketide		1	0	0	0	12	C\C=C\C=C1/C=CC2=C1C(=O)CCN2
BGC0001023	Stigmatella	myxochromide s1	1	722.4	206.1	1.9626	8	5	NRP		0	0	0	0	3	C\C=C\C=C\C=C\C=C\C=C\C=C\C=C\C(=O)N(C)[C@H]1[C@@H](C)OC(=O)[C@H](CCC(N)=O)NC(=O)[C@H](C)NC(=O)[C@H](C)NC(=O)[C@H](CC(C)C)NC1=O
BGC0001171	Listeria	listeriolysin s	1	-1					RiPP	Cytotoxic	1	0	0	0	8
BGC0001231	Jahnella	microsclerodermin	1	868.316	311.85	-2.9416	12	12	NRP	Antibacterial	0	1	0	0	14	O=C([C@@H](O)[C@H](NC(C[C@@H](O)CNC(CNC([C@@H](CC1=CNC2=C1C=CC(Cl)=C2)NC(CN(C(C3)=O)C)=O)=O)=O)=O)[C@H](O)[C@@H](O)C/C=C/C4=CC=CC=C4)N[C@H](C5)[C@@]3(O)NC5=O
BGC0000257	Streptomyces	prodigiosin	1	323.2	53.17	2.97012	2	2	Polyketide		1	0	0	0	24	CCCCCC1=C(NC(=C1)/C=C\2/C(=C/C(=C/3\C=CC=N3)/N2)OC)C
BGC0000154	Talaromyces	stipitatic acid	1	182.022	94.83	0.1562	4	3	Polyketide	Antiplasmodial	2	0	0	0	14	C1=C(C=C(C(=CC1=O)O)O)C(=O)O
BGC0001665	Mycobacterium	methylated alkyl-resorcinol	2	-1					Polyketide		1	0	0	0	6
BGC0001908	Streptomyces	sceliphrolactam	1	-1					Polyketide		1	0	0	0	25
BGC0000217	Streptomyces	daunorubicin	1	527.179	185.84	1.0289	11	5	Polyketide		1	0	0	0	9	C[C@H]1[C@H]([C@H](C[C@@H](O1)O[C@H]2C[C@@](CC3=C(C4=C(C(=C23)O)C(=O)C5=C(C4=O)C=CC=C5OC)O)(C(=O)C)O)N)O
BGC0000561	Streptococcus	thermophilin 1277	1	-1					RiPP		1	0	0	0	20
BGC0001957	Streptomyces	amipurimycin	1	-1					Polyketide		1	0	0	0	30
BGC0000535	Lactococcus	nisin a	1	3351.55	1213.57	-11.4707	49	41	RiPP	Antibacterial,Signalling	1	1	0	0	11	CCC(C)C1C(=O)NC(=C)C(=O)NC(C(=O)NC(CSCC(C(=O)N1)NC(=O)/C(=C/C)/NC(=O)C(C(C)CC)N)C(=O)NC2C(SCC(NC(=O)CNC(=O)C3CCCN3C2=O)C(=O)NC(CCCCN)C(=O)NC4C(SCC(NC(=O)CNC(=O)C(NC(=O)C(NC(=O)C(NC(=O)CNC4=O)C)CC(C)C)CCSC)C(=O)NC(CC(=O)N)C(=O)NC(CCSC)C(=O)NC(CCCCN)C(=O)NC5C(SCC6C(=O)NC(C(=O)NC(CSC(C(C(=O)N6)NC(=O)C(NC5=O)C)C)C(=O)NC(CO)C(=O)NC(C(C)CC)C(=O)NC(CC7=CNC=N7)C(=O)NC(C(C)C)C(=O)NC(=C)C(=O)NC(CCCCN)C(=O)…
BGC0000457	Rhizobium	vicibactin	1	774.365	287.82	-0.5265	15	6	NRP		0	0	0	1	9	C[C@@H]1CC(=O)N(O)CCC[C@@H](NC(C)=O)C(=O)O[C@H](C)CC(=O)N(O)CCC[C@@H](NC(C)=O)C(=O)O[C@H](C)CC(=O)N(O)CCC[C@@H](NC(C)=O)C(=O)O1
BGC0000185	Teredinibacter	tartrolon	1	878.496	173.35	4.3158	13	2	Polyketide		0	0	0	0	10	[B-]123OC4C(=O)OC(CC/C=C\CCCCC(CC(=O)C([C@@H]5CC[C@H]([C@@](O1)(O5)C(O2)C(=O)OC(CC/C=C\C=C\CCC(CC(=O)C([C@@H]6CC[C@H]([C@]4(C6)O3)C)C)O)C)C)C)O)C.[Na+]
BGC0002016	Streptomyces	lugdunomycin	1	-1					Polyketide		1	0	0	0	27
BGC0000174	Candidatus	bryostatin	1	904.446	240.11	4.2799	17	4	Polyketide		0	0	0	0	5	CCC/C=C/C=C/C(=O)O[C@H]1/C(=C/C(=O)OC)/C[C@H]2C[C@@H](OC(=O)C[C@@H](C[C@@H]3CC(C([C@@](O3)(C[C@@H]4C/C(=C/C(=O)OC)/C[C@@H](O4)/C=C/C([C@@]1(O2)O)(C)C)O)(C)C)OC(=O)C)O)[C@@H](C)O
BGC0001805	Klebsiella	tilivalline	1	333.148	68.36	3.6449	3	3	NRP		0	0	0	0	19	C1C[C@H]2[C@@H](NC3=C(C=CC=C3O)C(=O)N2C1)C4=CNC5=CC=CC=C54
BGC0001902	Myxococcus	bengamide	1	-1					NRP		0	0	0	0	18
BGC0000898	Streptomyces	desosamine	1	175.121	52.93	-0.5953	4	2	Saccharide	Antibacterial	1	1	0	0	9	C[C@@H]1C[C@@H]([C@H]([C@@H](O1)O)O)N(C)C
BGC0000588	Escherichia	microcin l	1	-1					RiPP		0	0	0	0	11
BGC0001817	Streptomyces	vancosamine	1	161.105	83.55	-0.9655	4	3	Other		1	0	0	0	5	C[C@@H]([C@H]([C@](C)(CC=O)N)O)O
BGC0000614	Streptomyces	thiostrepton	1	1663.49	562.74	0.7739	31	17	RiPP		1	0	0	0	21	CCC(C)C1C(=O)NC(C(=O)NC(=C)C(=O)NC(C(=O)NC23CCC(=NC2C4=CSC(=N4)C(C(OC(=O)C5=NC6=C(C=CC(C6O)N1)C(=C5)C(C)O)C)NC(=O)C7=CSC(=N7)C(NC(=O)C8CSC(=N8)/C(=C\C)/NC(=O)C(NC(=O)C9=CSC3=N9)C(C)O)C(C)(C(C)O)O)C1=NC(=CS1)C(=O)NC(=C)C(=O)NC(=C)C(=O)N)C)C
BGC0000114	Streptomyces	nigericin	1	724.476	142.37	5.7056	10	3	Polyketide	veterinary medicine, animal husbandry,antimalaria	1	0	0	0	18	[H][C@](C)(C(O)=O)[C@]1([H])O[C@@H](C[C@@H]2C[C@@H](OC)[C@@H](C)[C@@]3(O[C@@](C)(C[C@H]3C)[C@@]3([H])CC[C@](C)(O3)[C@]3([H])O[C@]([H])(C[C@@H]3C)[C@@]3([H])O[C@@](O)(CO)[C@H](C)C[C@@H]3C)O2)CC[C@@H]1C
BGC0001931	unidentified	carrimycin	1	-1					Polyketide		3	0	0	0	45
BGC0001645	Streptomyces	lagmysin	1	1515.8	606.34	-7.2704	21	20	RiPP		1	0	0	0	5	C[C@H]1C(=O)NCC(=O)N[C@H](C(=O)NCC(=O)N[C@H](C(=O)N2CCC[C@H]2C(=O)N[C@@H](CC(=O)N[C@H](C(=O)N1)CC(C)C)C(=O)N[C@@H](CC(C)C)C(=O)N[C@@H](CC(C)C)C(=O)NCC(=O)NCC(=O)N[C@@H](CC3=CN=CN3)C(=O)N[C@@H](CO)C(=O)N[C@@H](CC(C)C)C(=O)N[C@@H](CC(C)C)C(=O)O)CO)CCC(=O)N
BGC0000110	Streptomyces	spectinabilin	4	477.215	91.81	6.55734	6	0	Polyketide		1	0	0	0	11	COC1=C(C)C(=O)C(C)=C(O1)C1C\C(CO1)=C\C(\C)=C\C(\C)=C\C(\C)=C\C1=CC=C(C=C1)N(=O)=O
BGC0000919	Pseudomonas	phaseolotoxin	1	531.199	307.44	-3.3395	8	10	Other		0	0	0	0	6	C[C@H](C(=O)N[C@H](CCCCN=C(N)N)C(=O)O)NC(=O)[C@@H](CCCNP(=O)(N)NS(=O)(=O)O)N
BGC0000914	Streptomyces	methylenomycin a	1	182.058	66.9	0.3737	3	1	Other		1	0	0	0	21	C[C@@]12O[C@]1(C)C(=O)C(=C)[C@H]2C(O)=O
BGC0001068	unidentified	pyripyropene a	1	583.242	151.46	3.7553	11	1	Terpene		3	0	0	0	8	[H][C@@]12C[C@H](OC(C)=O)[C@@]3(C)OC4=C([C@H](O)[C@]3([H])[C@@]1(C)CC[C@H](OC(C)=O)[C@@]2(C)COC(C)=O)C(=O)OC(=C4)C1=CN=CC=C1
BGC0000560	Bacillus	subtilomycin	1	3234.6					RiPP	Antibacterial	1	1	0	0	6
BGC0000583	Streptomyces	grisemycin	1	1832	624.66	-3.3676	23	20	RiPP		1	0	0	0	13	CC(C(N/C(C(N1C(CCC1)C(NC(C)C(NC(C(NC(C(NC(C(NC(C(NC(C(NC(C(NC(C(NC(C(NC(C(N/C(C(NC(C(NC(C(NC(C(NC2C(C)C)=O)CC(C)C)=O)CS/C=C\NC2=O)=O)[C@H](C)CC)=O)=C/C)=O)CO)=O)[H])=O)CCC(N)=O)=O)[C@H](C)CC)=O)C(C)C)=O)CC3=CC=CC=C3)=O)CCC(N)=O)=O)C)=O)C(C)C)=O)=O)=O)=C\C)=O)N(C)C
BGC0001712	Aspergillus	ochrindole a	1	452.21	70.27	7.2147	3	3	Other		2	0	0	0	17	COC1=C(O)C(C2=CNC3=CC=CC=C23)=C(OC)C(CC=C(C)C)=C1C1=CNC2=C1C=CC=C2
BGC0001291	Enterococcus	enterocin nkr-5-3b	1	-1					RiPP		1	0	0	0	10
BGC0000850	Streptomyces	γ-butyrolactone	1	86.0368	26.3	0.3234	2	0	Other		1	0	0	0	3	C1CC(=O)OC1
BGC0000671	Oryza	momilactone	1	314.188	43.37	3.8359	3	0	Terpene		3	0	0	0	7	C[C@]1(CC[C@@H]2C(=C[C@@H]3[C@@H]4[C@@]2(CCC(=O)[C@@]4(C(=O)O3)C)C)C1)C=C
BGC0000355	Aspergillus	fumiquinazoline a	3	445.175	116.56	1.0707	7	3	NRP	Cytotoxic	2	0	0	0	5	[H][C@]12N[C@@H](C)C(=O)N1C1=CC=CC=C1[C@@]2(O)C[C@@]1([H])N2C(=O)C3=C(C=CC=C3)N=C2[C@H](C)NC1=O
BGC0000944	Staphylococcus	staphyloferrin a	1	475.086	299.31	-9.8603	14	4	Other	Siderophore	1	0	0	1	4	C(C[C@H](C(=O)[O-])NC(=O)CC(CC(=O)[O-])(C(=O)[O-])O)CNC(=O)CC(CC(=O)[O-])(C(=O)[O-])O
BGC0001440	Kitasatospora	cystargolide a	2	370.21	121.8	0.9403	5	3	Other	Inhibitor	1	0	0	0	10	CC[C@H](C)[C@H](NC(=O)[C@@H](NC(=O)C1OC(=O)C1C(C)C)C(C)C)C(O)=O
BGC0001083	Streptomyces	merochlorin a	8	430.191	74.6	5.5271	4	2	Polyketide	Antibacterial	1	1	0	0	41	CC(C)C1CC2C(C)(CCC=C(C)C)C3(Cl)C(=O)C2(C1)C1=CC(O)=CC(O)=C1C3=O
BGC0001697	Neurospora	neurosporin a	1	-1					Polyketide		2	0	0	0	15
BGC0000018	Streptomyces	angolamycin	1	915.519	230.97	2.0739	18	4	Polyketide		1	1	0	0	5	CCC1C(C2C(O2)(/C=C/C(=O)C(CC(C(C(C(CC(=O)O1)O)C)OC3CC(C(C(O3)C)OC4CC(C(C(O4)C)O)(C)O)N(C)C)CC=O)C)C)COC5C(C(C(C(O5)C)O)OC)OC
BGC0001405	Chaetomium	chaetoviridin e	2	432.134	89.9	3.6604	6	1	Polyketide		2	0	0	0	18	CC[C@@H](C)\C=C\C1=CC2=C(Cl)C(=O)[C@@]3(C)OC(=O)C(C(=O)[C@@H](C)[C@@H](C)O)=C3C2=CO1
BGC0000117	Streptomyces	oligomycin	1	790.523	180.05	5.8826	11	5	Polyketide		1	0	0	0	18	CC[C@H]\1CC[C@@H]2[C@@H]([C@@H]([C@H]([C@@]3(O2)CC[C@H]([C@H](O3)C[C@H](C)O)C)C)OC(=O)/C=C/[C@H]([C@@H]([C@H](C(=O)[C@H]([C@@H]([C@H](C(=O)[C@@]([C@@H]([C@H](C/C=C/C=C1)C)O)(C)O)C)O)C)C)O)C)C
BGC0000112	Streptomyces	neocarzinostatin	1	659.2	174.77	1.38742	13	4	Polyketide	Antibacterial,Cytotoxic	1	1	0	0	46	C[C@@H]1[C@@H]([C@@H]([C@H]([C@H](O1)O[C@H]\2[C@@H](C=C3/C2=C\C#C[C@@H]4[C@@](O4)(C#C3)[C@H]5COC(=O)O5)OC(=O)C6=C(C=CC7=C(C=C(C=C76)OC)C)O)NC)O)O
BGC0000566	Streptococcus	streptolysin s	1	-1					RiPP	Cytotoxic	1	0	0	0	9
BGC0001518	Aspergillus	astellolide a	1	470.194	105.2	3.3881	8	0	Terpene		2	0	0	0	10	[H][C@@]12[C@@H](CC3=C(COC3=O)[C@@]1(COC(C)=O)CCC[C@]2(C)COC(C)=O)OC(=O)C1=CC=CC=C1
BGC0000728	Klebsiella	capsular polysaccharide	1	1004.31	523.2	-14.0081	31	20	Saccharide		0	0	0	0	16	C(C1C(C(C(C(O1)OC2C(C(OC(C2OC3C(C(C(C(O3)C(=O)O)OC4C(C(C(C(O4)CO)O)O)O)O)O)OC5C(OC(C(C5O)O)OCC6C(C(C(C(O6)O)O)O)O)CO)CO)O)O)O)O)O
BGC0001257	Nodulisporium	1,3,6,8-tetrahydroxynaphthalene	1	192.042	80.92	1.6622	4	4	Polyketide		2	0	0	0	1	C1=C2C=C(C=C(C2=C(C=C1O)O)O)O
BGC0001414	Streptomyces	griselimycin	1	1112.72	255.77	2.2607	12	3	NRP		1	0	0	0	26	C[C@@H]1C[C@H]2C(=O)N[C@H](C(=O)N([C@H](C(=O)N3CCC[C@H]3C(=O)N([C@H](C(=O)NCC(=O)OC([C@@H](C(=O)N[C@H](C(=O)N2C1)CC(C)C)N(C)C(=O)[C@@H]4C[C@H](CN4C(=O)[C@H](C(C)C)N(C)C(=O)C)C)C)CC(C)C)C)C(C)C)C)CC(C)C
BGC0000526	Streptococcus	macedocin	1	-1					RiPP	Antibacterial	1	1	0	0	14
BGC0000537	Streptococcus	nisin u	1	-1					RiPP		1	0	0	0	11
BGC0001778	Streptomyces	showdomycin	1	229.059	116.09	-2.9493	6	4	Other		1	0	0	0	17	OC[C@H]1O[C@H]([C@H](O)[C@@H]1O)C1=CC(=O)NC1=O
BGC0001794	Alternaria	swainsonine	1	173.105	63.93	-1.4529	4	3	Polyketide		2	0	0	0	6	C1C[C@H]([C@@H]2[C@@H]([C@@H](CN2C1)O)O)O
BGC0000962	Lyngbya	barbamide	1	460.055	42.43	5.812	4	0	NRP	Cytotoxic	0	0	0	0	12	CO\C(CC(C)C(Cl)(Cl)Cl)=C\C(=O)N(C)C(CC1=CC=CC=C1)C1=NC=CS1
BGC0000990	Sorangium	epothilone	1	507.265	109.25	4.47752	8	2	NRP		0	0	0	0	24	C[C@H]1CCC[C@@]2([C@@H](O2)C[C@H](OC(=O)C[C@@H](C(C(=O)[C@@H]([C@H]1O)C)(C)C)O)/C(=C/C3=CSC(=N3)C)/C)C
BGC0000839	Chitinophaga	flexirubin	1	634.402	66.76	11.6902	4	2	Other		0	0	0	0	25	CCCCCCCCCCCCC1=C(C=C(C=C1OC(=O)/C=C/C=C/C=C/C=C/C=C/C=C/C=C/C=C/C2=CC(=C(C=C2)O)C)C)O
BGC0000641	Enterobacteriaceae	carotenoid	1	738.674	99.38	11.5564	6	4	Terpene		0	0	0	0	6	C[C@H](CCCCC(C)CCC[C@@H](C)CCCC(C)CCC=C(C)C)CCC[C@H](C)CCC[C@H](C)CCCC(C)(C)O[C@@H]1[C@@H]([C@H]([C@@H]([C@H](O1)CO)O)O)O
BGC0001587	Streptomyces	ethylenediaminesuccinic acid hydroxyarginine (edha)	1	349.16	218.09	-3.21923	7	9	Other		1	0	0	0	6	N=C(N)NCC(O)CC(C(O)=O)NCCNC(CC(O)=O)C(O)=O
BGC0000596	Streptomyces	sli-2138	1	2138.17					RiPP		1	0	0	0	21
BGC0000385	Lysobacter	lysobactin	1	1275.72	529.23	-5.22493	19	19	NRP		0	1	0	0	91	CC[C@H](C)[C@@H]1NC(=O)[C@@H](CCCNC(N)=N)NC(=O)[C@H](CC(C)C)NC(=O)[C@@H](NC(=O)[C@@H](NC(=O)[C@H](CC(C)C)NC(=O)[C@H](N)CC(C)C)[C@H](OC(=O)[C@H](CO)NC(=O)[C@@H](NC(=O)CNC(=O)[C@@H](NC1=O)[C@H](C)O)[C@H](O)C(N)=O)C1=CC=CC=C1)[C@H](O)C(C)C
BGC0000619	Lactobacillus	gassericin t	1	-1					RiPP		1	0	0	0	9
BGC0000612	Bacillus	thiocillin i	1	1159.2	345.75	4.6829	23	10	RiPP	Antibacterial	1	1	0	0	21	C/C=C/1\C2=NC(=CS2)C(=O)NC(C3=NC(=CS3)C(=O)NC(C4=NC(=CS4)C5=C(C=CC(=N5)C6=NC(=CS6)C7=NC(=CS7)C(=O)N/C(=C/C)/C(=O)NCC(C)O)C8=NC(=CS8)C(=O)NC(C(=O)N1)C(C)O)C(C)O)C(C)(C)O
BGC0000143	Streptomyces	salinomycin	1	750.492	161.21	6.188	10	4	Polyketide		1	1	0	0	8	CCC(C1CCC(C)C(O1)C(C)C(O)C(C)C(=O)C(CC)C1OC2(OC3(CCC(C)(O3)C3CCC(O)(CC)C(C)O3)C(O)C=C2)C(C)CC1C)C(O)=O
BGC0000337	Metarhizium	destruxin a	1	577.348	145.43	0.846	7	2	NRP		2	0	0	0	21	[H][C@@]12CCCN1C(=O)[C@@H](CC=C)OC(=O)CCNC(=O)[C@H](C)N(C)C(=O)[C@H](C(C)C)N(C)C(=O)[C@@H](NC2=O)[C@@H](C)CC
BGC0001793	Chaetothyriaceae	swainsonine	1	173.105	63.93	-1.4529	4	3	Polyketide		2	0	0	0	7	C1C[C@H]([C@@H]2[C@@H]([C@@H](CN2C1)O)O)O
BGC0001836	Gynuella	tartrolon d	3	820.461	226.58	4.3586	14	6	Polyketide	Antibacterial	0	1	0	0	16	C[C@H]1[C@@]2(O)O[C@H](CC(C[C@H](CC/C=C/C=C\CC[C@H](C)OC(C([C@@]3(O)[C@H](C)CC[C@@H](CC(C[C@H](CC/C=C/C=C\CC[C@H](C)OC(C2O)=O)O)=O)O3)O)=O)O)=O)CC1
BGC0000696	Micromonospora	gentamicin	1	468.243	248.39	-6.3916	14	10	Saccharide		1	1	0	0	65	CN[C@H]1[C@@H](O)CO[C@H](O[C@H]2[C@H](N)C[C@H](N)[C@@H](O[C@H]3O[C@H](CN)[C@@H](O)[C@H](O)[C@H]3O)[C@@H]2O)[C@@H]1O
BGC0000711	Streptomyces	neomycin	1	614.312	353.11	-8.8953	19	13	Saccharide		1	1	0	0	21	C1[C@H]([C@@H]([C@H]([C@@H]([C@H]1N)O[C@@H]2[C@@H]([C@H]([C@@H]([C@H](O2)CN)O)O)N)O[C@H]3[C@@H]([C@@H]([C@H](O3)CO)O[C@@H]4[C@@H]([C@H]([C@@H]([C@@H](O4)CN)O)O)N)O)O)N
BGC0000971	Streptomyces	cinnabaramide a	1	335.21	75.63	2.4743	4	2	NRP		1	0	0	0	22	[H][C@@]1(CCCC=C1)[C@H](O)[C@@]12NC(=O)[C@H](CCCCCC)[C@]1(C)OC2=O
BGC0001178	Actinoplanes	uk-68,597	1	1649.21	565.27	3.6611	28	18	NRP	Antibacterial	1	1	0	0	46	O=C1N[C@@H](C2=CC(O3)=CC(OS(O)(=O)=O)=C2)C(N[C@@H](C(N[C@@H]45)=O)C6=CC(OC7=C(Cl)C=C(C[C@@H]1NC(C(C8=CC3=C(O)C(Cl)=C8)=O)=O)C=C7)=C(O[C@@H]9[C@H](OC%10O[C@@H](C)[C@@H](O)[C@](N)(C)C%10)[C@@H](O)[C@H](O)[C@@H](CO)O9)C(OC%11=CC=C([C@@H](O)[C@H](NC4=O)C(N[C@@H](C(O)=O)C%12=CC(O)=CC(O)=C%12C%13=CC5=CC(Cl)=C%13O)=O)C=C%11Cl)=C6)=O
BGC0000549	Streptococcus	salivaricin d	1	3466.65	1241.75	-9.2151	47	41	RiPP		1	0	0	0	13	[H]N[C@@H](CC1=CC=CC=C1)C(N/C(C(N[C@@H]2C(N[C@@H](CC3=CN=CN3)C(NC(C(N[C@H](C(N[C@@H](CSC2)C(N[C@@H]4C(N5CCC[C@H]5C(NCC(N[C@@H](CSCC4)C(N[C@]([C@@H](C)CC)([H])C(N[C@@H]6C(NCC(N[C@H](C(N[C@H](C(N[C@@H](CCSC)C(NCC(N[C@@H](CSCC6)C(N[C@@H](CC7=CN=CN7)C(N[C@]([C@@H](C)CC)([H])C(N[C@H](C(N[C@@H]8C(N[C@]([C@@H](C)CC)([H])C(NCC(N[C@@H](CSC8)C(N[C@H](C(N[C@H](C(N[C@@H](CC9=CN=CN9)C(N[C@]([C@@H](C)CC)([H])C…
BGC0001074	Streptomyces	cosmomycin d	1	1188.58	313.22	3.6734	24	8	Saccharide		1	0	0	0	40	CC[C@@]1(O)C[C@H](O[C@H]2C[C@@H]([C@H](O[C@H]3C[C@H](O)[C@H](O[C@H]4CC[C@H](O)[C@H](C)O4)[C@H](C)O3)[C@H](C)O2)N(C)C)C2=C(O)C3=C(C(O)=C2[C@H]1O[C@H]1C[C@@H]([C@H](O[C@H]2C[C@H](O)[C@H](O[C@H]4CC[C@H](O)[C@H](C)O4)[C@H](C)O2)[C@H](C)O1)N(C)C)C(=O)C1=C(C(O)=CC=C1)C3=O
BGC0001186	Candidatus	misakinolide a	1	1336.9	288.28	8.9958	20	8	Polyketide		0	0	0	0	25	C[C@@H]1O[C@H](C[C@@H](C1)OC)CC[C@@H]([C@H](O)[C@@H]([C@H]2OC(=O)/C(=C/C[C@@H](C[C@H]3O[C@H](C[C@@H]([C@H]([C@H](C[C@H]([C@@H]([C@H](OC(=O)/C(=C/C[C@@H](C[C@H]4O[C@H](C[C@@H]([C@H]([C@H](C[C@H]([C@@H]2C)O)O)C)OC)CC=C4)O)/C)[C@H]([C@@H](O)[C@H](CC[C@@H]5O[C@H](C[C@H](C5)OC)C)C)C)C)O)O)C)OC)CC=C3)O)/C)C)C
BGC0000326	Streptomyces	isocomplestatin	1	1325.11	346.35	9.1969	14	12	NRP		1	0	0	0	16	CN1[C@@H](CC2=CC=C(OC3=CC4=CC(=C3O)C3=CC5=C(C=C3)C(C[C@@H](NC(=O)C(=O)C3=CC(Cl)=C(O)C(Cl)=C3)C(=O)N[C@H](C3=CC(Cl)=C(O)C(Cl)=C3)C(=O)N[C@H]4C(=O)N[C@H](C3=CC(Cl)=C(O)C(Cl)=C3)C1=O)=CN5)C=C2)C(=O)N[C@@H](C(O)=O)C1=CC=C(O)C=C1
BGC0001056	Serratia	zeamine	5	840.812	219.89	9.1512	9	9	NRP	Antibacterial	0	1	0	0	23	CCCCCC(N)CCCCCCCC(N)CCCCCCCC(N)CCCCCCCC(N)CCCCCCCC(O)CCNC(=O)CC(O)CC(O)C(N)C(C)C
BGC0000171	Streptomyces	9-methylstreptimidone	1	307.178	83.47	1.9079	4	2	Polyketide	Antifungal	1	0	1	0	31	[H][C@@](O)(CC1CC(=O)NC(=O)C1)CC(=O)[C@@]([H])(C)\C=C(/C)\C=C/C
BGC0000480	Nostoc	tenuecyclamide a	2	460.099	139.11	2.68242	9	3	RiPP		0	0	0	0	7	C[C@@H]1NC(=O)C2=CSC(=N2)[C@@H](C)NC(=O)C2=CSC(=N2)[C@H](C)NC(=O)C2=C(C)OC1=N2
BGC0001189	Cupriavidus	taiwachelin	1	962.481	411.2	-3.1101	16	14	NRP		0	0	0	1	18	CCCCCCCCCCCC(=O)N[C@@H]([C@@H](C(=O)O)O)C(=O)N[C@H]([C@@H](C)O)C(=O)N[C@@H](CC(=O)O)C(=O)N[C@H](CCCN(C(=O)C[C@H](C)O)O)C(=O)N[C@@H](CO)C(=O)N[C@H]1CCCN(C1=O)O
BGC0001078	Streptomyces	furaquinocin b	1	402.168	113.29	2.4198	7	3	Terpene		1	0	0	0	23	COC1=C(C)C(=O)C2=C(C=C(O)C3=C2O[C@@H](C)[C@@]3(C)C(O)C\C=C(/C)CO)C1=O
BGC0000975	Nostoc	cryptophycin-327	1	654.271	132.56	4.734	8	2	NRP		0	0	0	0	8	COC1=C(Cl)C=C(C[C@H]2NC(=O)\C=C/C[C@H](OC(=O)[C@H](CC(C)C)OC(=O)[C@H](C)CNC2=O)[C@H](C)[C@H]2O[C@@H]2C2=CC=CC=C2)C=C1
BGC0000454	Vibrio	vanchrobactin	1	397.16	218.09	-1.97883	7	9	NRP		0	0	0	1	10	NC(=N)NCCC[C@@H](NC(=O)C1=CC=CC(O)=C1O)C(=O)N[C@@H](CO)C(O)=O
BGC0000308	Staphylococcus	aureusimine	1	-1					NRP		1	0	0	0	2
BGC0000131	Streptomyces	pyrrolomycin	1	179.949	58.93	2.2297	2	1	Polyketide		1	1	0	0	6	C1=C(C(=C(N1)Cl)Cl)[N+](=O)[O-]
BGC0001459	Amycolatopsis	decaplanin	1	1559.53	589.41	-1.6954	29	21	NRP	Antibacterial	1	1	0	0	38	CC1C(C(C(C(O1)OC2C(C(C(OC2OC3=C4C=C5C=C3OC6=C(C=C(C=C6)C(C(C(=O)NC(C(=O)NC5C(=O)NC7C8=CC(=C(C=C8)O)C9=C(C=C(C=C9C(NC(=O)C(C(C1=CC=C(O4)C=C1)OC1CC(C(C(O1)C)O)(C)N)NC7=O)C(=O)O)O)O)CC(=O)N)NC(=O)C(CC(C)C)NC)O)Cl)CO)O)O)O)O)O
BGC0000527	Bacillus	mersacidin	1	1832.84	607.43	-3.9346	25	24	RiPP		1	1	0	0	10	CC[C@H](C)[C@@H](C(=O)NC(=C)S)NC(=O)[C@H](CS)NC(=O)[C@H](CCC(=O)O)NC(=O)C(=C)NC(=O)[C@H](CC)NC(=O)[C@H](CC(C)C)NC(=O)[C@@H](CC)NC(=O)[C@H](CS)NC(=O)[C@H](C(C)C)NC(=O)CNC(=O)CNC(=O)CNC(=O)CNC(=O)[C@@H]1CCCN1C(=O)[C@H](CC(C)C)NC(=O)[C@@H](CC)NC(=O)[C@H](CC2=CC=CC=C2)NC(=O)[C@@H](CC)NC(=O)[C@H](CS)N
BGC0000943	Staphylococcus	staphylobactin	1	-1					Other		1	0	0	1	16
BGC0002019	Streptomyces	tiancilactone	1	-1					Terpene		1	0	0	0	23
BGC0001350	Leptolyngbya	phormidolide	1	1156.68	148.44	15.3977	12	2	Polyketide		0	0	0	0	23	[H][C@@]12C[C@@]([H])(OC(=O)\C=C(/C)\C=C\C[C@@H](O)CC(=C)\C=C(C)\C1)[C@](C)(O2)[C@@H](O)\C=C(/C)C[C@H]1OC(C)(C)O[C@@H](C[C@H]2OC(C)(C)O[C@@H](C[C@H](CC(=C)C(\OC)=C/Br)OC(=O)CCCCCCCCCCCCCCC)[C@H]2C)C1(C)C
BGC0000703	Streptomyces	kanamycin	1	484.238	282.61	-7.2914	15	11	Saccharide		1	1	0	0	185	C1[C@H]([C@@H]([C@H]([C@@H]([C@H]1N)O[C@@H]2[C@@H]([C@H]([C@@H]([C@H](O2)CN)O)O)O)O)O[C@@H]3[C@@H]([C@H]([C@@H]([C@H](O3)CO)O)N)O)N
BGC0001964	Cystobacterineae	alkylpyrone-407	2	-1					Polyketide		0	0	0	0	44
BGC0000788	Salmonella	o-antigen	1	-1					Saccharide		0	0	0	0	19
BGC0002024	Nocardia	nargenicin	1	-1					Polyketide		1	0	0	0	26
BGC0000039	Penicillium	compactin	1	408.251	104.06	3.4696	5	3	Polyketide		2	0	0	0	9	CC[C@H](C)C(=O)O[C@H]1CCC=C2C=C[C@H](C)[C@H](CC[C@@H](O)C[C@@H](O)CC(O)=O)[C@@H]12
BGC0001152	Paenibacillus	fusaricidin b	1	896.57	346.35	-0.65613	12	12	NRP	Antifungal	1	0	1	0	8	CC(C)[C@H]1NC(=O)[C@@H](NC(=O)CC(O)CCCCCCCCCCCCNC(N)=N)C(C)OC(=O)[C@@H](C)NC(=O)[C@@H](CCC(N)=O)NC(=O)[C@H](NC(=O)[C@@H](NC1=O)C(C)C)[C@H](C)O
BGC0001618	Staphylococcus	hyicin 3682	1	-1					RiPP		1	0	0	0	8
BGC0000960	Streptomyces	azinomycin b	1	623.212	193.1	0.89392	12	4	NRP		1	0	0	0	47	[H][C@@]12CN1\C([C@@H](OC(C)=O)[C@@H]2O)=C(\NC(=O)[C@@H](OC(=O)C1=C2C=CC=C(C)C2=CC(OC)=C1)[C@]1(C)CO1)C(=O)N\C(=C\O)C(C)=O
BGC0001361	Serratia	sodorifen	1	218.203	0	4.8271	0	0	Terpene		0	0	0	0	4	C[C@@H]1C(=C)[C@@H]([C@@]2(C([C@]1(C(=C2C)C)C)C)C)C
BGC0001280	Phoma	betaenone c	2	366.241	94.83	3.0428	5	3	Polyketide		2	0	0	0	8	CCC(C)C1C(C2C(CC(CC2C(=O)C1(C)O)(C)O)C)(C)C(=O)/C=C\O
BGC0001958	Streptomyces	amipurimycin	1	-1					Other		1	0	0	0	30
BGC0000584	Escherichia	colicin v	1	-1					RiPP		0	0	0	0	5
BGC0001639	Klebsiella	klebsidin	1	-1					RiPP		0	0	0	0	5
BGC0000305	Pseudomonas	arthrofactin a	1	1353.8	481.69	-0.4134	18	16	NRP	Surfactant	0	0	0	0	6	CCCCCCC[C@H](O)CC(N[C@@H](C(N[C@@H](C(N[C@H]([C@H](OC([C@@H](NC([C@@H](NC([C@@H](NC([C@@H](CO)NC(C(CC(C)C)N1)=O)=O)[C@@H](C)CC)=O)[C@@H](C)CC)=O)CC(O)=O)=O)C)C(N[C@@H](C(N[C@H](CC(C)C)C(N[C@H](CO)C1=O)=O)=O)CC(C)C)=O)=O)CC(O)=O)=O)CC(C)C)=O
BGC0001502	Aeromonas	amonabactin p 750	1	750.322	289.74	0.7498	11	11	NRP		0	0	0	0	7	N[C@@H](CCCCNC(=O)CNC(=O)C1=CC=CC(O)=C1O)C(=O)N[C@@H](CCCCNC(=O)C1=CC=CC(O)=C1O)C(=O)N[C@@H](CC1=CC=CC=C1)C(O)=O
BGC0000935	Streptomyces	esmeraldin	1	652.196	162.18	8.10342	9	4	Other	Pigment	1	0	0	0	25	CC1C2=C3C(=CC=C2)NC4=C(C=CC=C4N3C5=C1C6=NC7=C(C=CC=C7N=C6C(=C5)C(=O)O)C(C)OC(=O)C8=C(C=CC=C8O)C)C(=O)O
BGC0001438	Streptomyces	warkmycin cs1	2	1007.4	348.44	-0.091	22	9	Polyketide		1	0	0	0	34	O[C@H](C(C)=C1)[C@@]2(O)[C@]([C@@]1([H])O[C@H](C[C@@H](OC)[C@@H]3O)O[C@H]3C)(O)C4=C(C(C(C(O)=C5[C@@H](C[C@@H](O[C@H]6C[C@]([C@H](O[C@@H]7O[C@@H]([C@H](CC7)OC(N)=O)C)[C@@H](C)O6)(C)O)[C@@H]8O)O[C@@H]8C)=C(C=C5)C4=O)=O)[C@H](O)[C@@H]2OC(C)=O
BGC0001136	Beauveria	desmethylbassianin	1	381.158	99.76	4.0612	6	3	NRP		2	0	0	0	5	OC1=CC=C(C2=CN(O)C(C(C(/C=C/C=C/C=C/[C@H](C)CC)=O)=C2O)=O)C=C1
BGC0001509	Pseudomonas	anikasin	1	-1					NRP		0	0	0	0	9
BGC0000189	Xenorhabdus	3-(2'-hydroxy-3'-oxo-4'-methylpentyl)-indole	4	231.126	53.09	2.2964	2	2	Polyketide		0	0	0	0	8	CC(C)C(=O)C(O)CC1=CNC2=C1C=CC=C2
BGC0001022	Stigmatella	myxalamid	1	401.293	69.56	4.6439	3	3	NRP		0	0	0	0	11	C[C@@H](CO)NC(=O)/C(=C/C=C/C=C\C=C\C(=C\[C@@H](C)[C@H](/C(=C/C(C)C)/C)O)\C)/C
BGC0000483	Microcystis	aeruginosamide b	2	574.261	100.63	4.4862	7	2	RiPP		0	0	0	0	6	CC(C)(C=C)N[C@@H](CC1=CC=CC=C1)C(=O)N[C@@H](CC2=CC=CC=C2)C(=O)N3CCC[C@H]3C4=NC(=CS4)C(=O)OC
BGC0000410	Pseudomonas	pseudomonine	1	330.133	107.55	0.6187	5	3	NRP		0	0	0	1	10	CC1ON(CCC2=CNC=N2)C(=O)C1NC(=O)C1=CC=CC=C1O
BGC0000764	Lactococcus	exopolysaccharide	1	-1					Saccharide		1	0	0	0	17
BGC0001062	Micromonospora	tln-05220	1	737.186	246.91	1.3697	13	5	Polyketide		1	0	0	0	30	CCC(C)C1=CC2=C(C(=O)N1CC(=O)N1CC(NC(=O)C1C)C(O)=O)C(=O)C1=C3C(O)=C4C(=O)C5=C(C(O)=CC=C5O)C(=O)C4=C(OC)C3=CC=C1C2=O
BGC0001731	Streptomyces	paulomycin	1	658.168	260.03	-1.9374	17	5	Other		1	0	0	0	53	C/C=C(/C(=O)O[C@@H]1[C@H](OC([C@@H]([C@@H]1O[C@@H]2C[C@H]([C@H]([C@H](O2)C)O)OC)O)C3(CC(=O)C(=C(C3=O)C(=O)O)N)O)COC(=O)C)\N=C=S
BGC0000635	Paracoccus	carotenoid	1	738.674	99.38	11.5564	6	4	Terpene		0	0	0	0	8	C[C@H](CCCCC(C)CCC[C@@H](C)CCCC(C)CCC=C(C)C)CCC[C@H](C)CCC[C@H](C)CCCC(C)(C)O[C@@H]1[C@@H]([C@H]([C@@H]([C@H](O1)CO)O)O)O
BGC0000810	Zea	benzoxazinone dimboa	1	211.048	79.23	0.1282	5	2	Alkaloid		3	0	0	0	20	COC1=CC2=C(C=C1)N(C(=O)C(O2)O)O
BGC0001720	Beauveria	oosporein	1	306.038	149.2	0.5782	8	4	Polyketide		2	0	0	0	14	CC1=C(O)C(=O)C(=C(O)C1=O)C1=C(O)C(=O)C(C)=C(O)C1=O
BGC0000780	Vibrio	o&k-antigen	1	-1					Saccharide		0	0	0	0	61
BGC0001647	Streptomyces	lagunapyrone a	3	512.35	90.9	6.69222	5	3	Polyketide		1	0	0	0	9	C\C=C(/C)[C@@H](O)[C@H](C)[C@H](O)C\C=C(/C)\C=C(/C)C\C(C)=C\C\C=C(/C)[C@@H](O)[C@@H](C)C1=CC=C(C)C(=O)O1
BGC0001567	Streptomyces	cysteoamide	1	-1					NRP		1	0	0	0	11
BGC0000342	Fusarium	enniatin	1	667.441	139.83	4.0767	9	0	NRP		2	0	0	0	1	CCCC[C@H]1C(=O)O[C@@H](C(=O)N([C@H](C(=O)O[C@@H](C(=O)N([C@H](C(=O)O[C@@H](C(=O)N1C)C(C)C)C(C)CC)C)C(C)C)C(C)C)C)C(C)C
BGC0001733	Pleurocapsa	pcpa	1	-1					RiPP		0	0	0	0	5
BGC0001055	Escherichia	yersiniabactin	1	481.116	111.02	2.0049	9	4	NRP		0	0	0	1	68	C[C@@]1(CSC(=N1)C(C)(C)[C@@H]([C@@H]2CSC(N2)[C@H]3CS/C(=C/4\C=CC=CC4=O)/N3)O)C(=O)O
BGC0001093	Sorangium	disorazol a	1	758.378	166.88	7.2529	12	2	NRP		0	0	0	0	21	COC1CC2=NC(=CO2)C(=O)OC(C\C=C/C2OC2\C=C\C=C/C2=NC(=CO2)C(=O)OC(C\C=C/C=C\C=C\1)C(C)(C)C(O)\C=C\C)C(C)(C)C(O)\C=C\C
BGC0000686	Aspergillus	helvolic acid	1	568.304	124.04	5.4001	7	1	Terpene		2	0	0	0	9	[H][C@@]12CC[C@@]3(C)\C([C@H](C[C@]3(C)[C@@]1(C)[C@H](OC(C)=O)C(=O)[C@@]1([H])[C@H](C)C(=O)C=C[C@]21C)OC(C)=O)=C(/CC=C(C)C)C(O)=O
BGC0001642	Fusarium	koraiol	1	222.198	20.23	3.6098	1	1	Terpene		2	0	0	0	1	CC1(CC2C1CCC(C3C2(CC3)C)(C)O)C
BGC0001008	Actinomadura	maduropeptin	1	453.098	99.23	1.1128	6	3	Polyketide	Antibacterial,Antioxidant	1	1	0	0	53	COC1=C2C(=C(C=C1)[C@H](CC(=O)N3C[C@H]3/C/4=C/C#C[C@H](O2)[C@]5([C@H](CC=C5C#C4)O)O)O)Cl
BGC0000300	Streptomyces	amychelin	1	738.282	329.09	-5.4221	15	11	NRP		1	0	0	1	16	OC[C@@H](NC(=O)[C@H](CO)NC(=O)[C@H]1COC(=N1)C1=CC=CC=C1O)C(=O)N[C@@H](CO)C(=O)N[C@H](CCCN(O)C=O)C(=O)N[C@@H]1CCCN(O)C1=O
BGC0000314	Pseudoalteromonas	bromoalterochromide a	1	843.28	278.21	0.6587	10	8	NRP	Antibacterial,Cytotoxic	0	1	0	0	14	O=C([C@H](CC(N)=O)NC1=O)N[C@H](CC(N)=O)C(N[C@H]([C@@H](C)CC)C(O[C@H](C)[C@H](C(N[C@@H]1C(C)C)=O)NC(/C=C/C=C/C=C/C=C/C2=CC=C(O)C(Br)=C2)=O)=O)=O
BGC0000773	Escherichia	lipopolysaccharide	1	4897.15	1888.75	-9.9821	107	62	Saccharide		0	0	0	0	16	CCCCCCCCCCCCCCCC1[C@H](OC([C@H]([C@@H]1OC(=O)CC(CCCCCCCCCCC)O)O)CO[C@H]2[C@H](C([C@@H](C(O2)CO[C@@]3(CC([C@H](C(O3)C(CO)O)O[C@H]4[C@@H](C([C@@H](C(O4)C(CO)O)OP(=O)(O)OP(=O)(O)OCCN)O[C@@H]5[C@@H](C([C@@H](C(O5)C(CO[C@@H]6[C@@H](C([C@](CO6)(C(CO)O)O)O)O)O)OP(=O)(O)O)O[C@@H]7C(C([C@@H](C(O7)CO[C@@H]8C(C([C@H](C(O8)CO)O)O)O)O)O[C@@H]9C(C([C@H](C(O9)CO)O)O)O[C@@H]1C(C([C@@H](C(O1)CO)O[C@@H]1C(C([C@H](…
BGC0001979	Streptomyces	ll-d49194α1 (lld)	1	-1					Polyketide		1	0	0	0	53
BGC0000392	Actinosynnema	mirubactin	1	-1					NRP		1	0	0	1	14
BGC0000244	Streptomyces	macrotetrolide	1	-1					Polyketide		1	0	0	0	6
BGC0001675	Streptomyces	murayaquinone	1	324.1	91.67	3.43502	5	2	Polyketide		1	0	0	0	58	CCCC(=O)C1=CC2=C(C(O)=C1C)C(=O)C(=O)C1=C2C=CC=C1O
BGC0001368	Streptomyces	jbir-126	1	535.183	174.51	0.2614	9	6	NRP		1	0	0	0	27	[H][C@@]1(CCCN1)[C@H](NC(=O)[C@]1(C)COC(=N1)C1=CN(C)C2=CC(Cl)=CC(O)=C12)C(=O)NC(C)(CO)C(O)=O
BGC0000273	Streptomyces	steffimycin d	1	560.189	181.44	0.7432	12	5	Polyketide		1	0	0	0	36	COC1C(O)C(O)C(C)OC1OC1C(OC)C(C)(O)CC2=CC3=C(C(O)=C12)C(=O)C1=C(C=C(OC)C=C1O)C3=O
BGC0000272	Streptomyces	spore pigment	1	-1					Polyketide		1	0	0	0	7
BGC0001801	Streptomyces	thiazostatin	5	-1					NRP		1	0	0	0	15
BGC0000666	Streptomyces	xiamycin a	1	363.183	73.32	4.3868	2	3	Terpene	Antibacterial	1	1	0	0	22	C[C@]12CC[C@@H]([C@@]([C@@H]1CCC3=C2C=C4C5=CC=CC=C5NC4=C3)(C)C(=O)O)O
BGC0001993	Paenibacillus	paenilipoheptin	1	-1					NRP		1	0	0	0	5
BGC0001033	Paenibacillus	paenilamicin	1	-1					NRP		1	0	0	0	14
BGC0000380	Sorangium	leupyrrin	1	707.391	145.74	5.8981	10	2	NRP	Antifungal	0	0	1	0	35	C1(OC/C(=C(/C)\CCC[*])/C/1=C/C1C2COC(=O)C(CC(C)C)CC(=O)OC3C(C)(CO)C(=O)OC3C(C)=CCC3NC(=CC=3)C(O2)=N1)CC(C)C
BGC0000634	Brevundimonas	carotenoid	1	738.674	99.38	11.5564	6	4	Terpene		0	0	0	0	12	C[C@H](CCCCC(C)CCC[C@@H](C)CCCC(C)CCC=C(C)C)CCC[C@H](C)CCC[C@H](C)CCCC(C)(C)O[C@@H]1[C@@H]([C@H]([C@@H]([C@H](O1)CO)O)O)O
BGC0001130	Xenorhabdus	fabclavine ia	1	1355.95	466.09	3.3662	17	16	NRP	Antibacterial,Antifungal,Cytotoxic	0	1	1	0	14	CC(N)CCCCCCCC(N)CCCCCCCC(N)CCCCCCCC(N)CCCCCCC[C@@H](O)CCNC(=O)C[C@@H](O)C[C@@H](O)[C@@H]3CCCN3C(=O)C2NC(=O)[C@H](CC(N)=O)NC(=O)[C@H](NC(=O)[C@H](Cc1ccccc1)NC(=O)C[C@H](N)C(=O)O)CC(=O)NC2C
BGC0001378	Streptomyces	tiancimycin	1	-1					Polyketide		1	0	0	0	36
BGC0001624	Pestalotiopsis	iso-a82775c	1	-1					Other		2	0	0	0	12
BGC0001975	Streptomyces	atratumycin	1	-1					NRP		1	0	0	0	38
BGC0000479	Planktothrix	prenylagaramide b	2	928.506	258.67	1.9096	10	7	RiPP		0	0	0	0	23	CC[C@H](C)[C@@H]1NC(=O)[C@@H]2CCCN2C(=O)[C@H](CC2=CC=C(O)C=C2)NC(=O)[C@H](CC(C)C)NC(=O)[C@H](CC2=CC=C(OCC=C(C)C)C=C2)NC(=O)[C@@H]2CCCN2C(=O)[C@H](CC(N)=O)NC1=O
BGC0000628	Lactobacillus	lactocillin	1	1223.15	345.82	6.1103	23	9	RiPP	Antibacterial	1	1	0	0	14	O=C(NC(C(O)=O)C)C1=CSC(C2=CSC(C3=NC(C4=CSC(C(CSC(C5=CNC6=C5C=CC=C6)=O)NC7=O)=N4)=C(C8=NC(C(NC(C(C)O)C(N/C(C9=NC(C(NC(C%10=NC7CS%10)C(O)C)=O)=CS9)=C\C)=O)=O)=CS8)C=C3)=N2)=N1
BGC0001416	Pseudomonas	nunapeptin	2	-1					NRP		0	0	0	0	14
BGC0000615	Nocardiopsis	tp-1161	1	1161.26	402.82	2.06952	22	10	RiPP	Antibacterial	1	1	0	0	24	C\C=C1\NC(=O)[C@@H](NC(=O)C2=CSC(=N2)C2=C(N=C(C=C2)C(=O)NC(=C)C(=O)NC(=C)C(=O)NCC(C)=O)C2=COC(=N2)C(=C)NC(=O)C(=C)NC(=O)C2=CSC(=N2)[C@H](C)NC(=O)C2=CSC(CNC(=O)C3=C(C)OC1=N3)=N2)[C@@H](C)O
BGC0001313	Arabidopsis	arabidiol-baruol	1	-1					Terpene		3	0	0	0	34
BGC0000887	Dolichospermum	saxitoxin	9	299.134	184.81	-3.852	10	6	Alkaloid	Neurotoxic	0	0	0	0	23	C1CN2C(=N[C@H]([C@H]3[C@]2(C1(O)O)N=C(N3)N)COC(=O)N)N
BGC0000890	Pseudoalteromonas	pentabromopseudilin	1	548.621	36.02	6.1998	1	2	Other	Antibacterial,Cytotoxic,Inhibitor	0	1	0	0	10	C1=C(C=C(C(=C1Br)O)C2=C(C(=C(N2)Br)Br)Br)Br
BGC0000792	Enterococcus	polysaccharide	1	-1					Saccharide		1	0	0	0	17
BGC0001012	Streptomyces	meridamycin	1	821.529	214.52	4.2749	12	7	NRP		1	0	0	0	5	CC\C1=C/C[C@H](OC(=O)C2CCCCN2C(=O)C(=O)[C@]2(O)O[C@@H](CC[C@H]2C)C[C@H](O)[C@H](C)[C@@H](O)C[C@@H](O)C[C@H](O)\C(C)=C/[C@@H](C)CC(C)[C@@H]1O)C(\C)=C\[C@@H](C)[C@@H](C)O
BGC0000136	Amycolatopsis	rifamycin	1	697.31	201.31	4.75412	12	6	Polyketide		1	1	0	0	64	C[C@H]1/C=C/C=C(\C(=O)NC2=CC(=C3C(=C2O)C(=C(C4=C3C(=O)[C@](O4)(O/C=C/[C@@H]([C@H]([C@H]([C@@H]([C@@H]([C@@H]([C@H]1O)C)O)C)OC(=O)C)C)OC)C)C)O)O)/C
BGC0001583	Escovopsis	emodin	1	270.053	94.83	1.88722	5	3	Polyketide		2	0	0	0	4	CC1=CC(=C2C(=C1)C(=O)C3=CC(=CC(=C3C2=O)O)O)O
BGC0001582	Nonomuraea	ecumicin	1	1599.01	400.27	3.9217	18	10	NRP		1	0	0	0	19	[H][C@]1(NC(=O)[C@@H](NC(=O)[C@H](CC2=CNC3=CC=CC(OC)=C23)N(C)C(=O)[C@H](C(C)C)N(C)C(=O)[C@@H](NC(=O)[C@H](CC(C)C)N(C)C(=O)[C@@H](NC(=O)[C@]([H])([C@@H](C)O)N(C)C(=O)[C@@H](NC(=O)[C@H]([C@H](C)CC)N(C)C(=O)[C@@H](NC(=O)[C@H](C(C)C)N(C)C)C(C)C)[C@@H](C)OC(=O)[C@@H](NC1=O)C(C)C)C(C)C)C(C)C)C(C)C)[C@H](O)C1=CC=CC=C1
BGC0001533	Streptomyces	borrelidin	1	489.309	127.85	4.63558	6	3	Polyketide		1	0	0	0	34	[H][C@]1(CCC[C@H]1C(O)=O)[C@]1([H])C\C=C\C=C(C#N)/[C@H](O)[C@@H](C)C[C@H](C)C[C@H](C)C[C@H](C)[C@@H](O)CC(=O)O1
BGC0000838	Flavobacterium	flexirubin	1	634.402	66.76	11.6902	4	2	Polyketide		0	0	0	0	36	CCCCCCCCCCCCC1=C(C=C(C=C1OC(=O)/C=C/C=C/C=C/C=C/C=C/C=C/C=C/C=C/C2=CC(=C(C=C2)O)C)C)O
BGC0002033	Streptomyces	spiramycin	1	-1					Polyketide		1	0	0	0	45
BGC0001864	Listeria	listeriocytocin	1	-1					RiPP		1	0	0	0	8
BGC0001240	Metarhizium	serinocyclin a	2	672.308	322.08	-7.8672	13	12	NRP		2	0	0	0	1	NCC[C@H](O)C[C@H]1NC(=O)[C@H](CO)NC(=O)[C@@H]2C[C@@H](O)CN2C(=O)C2(CC2)NC(=O)[C@H](CO)NC(=O)[C@@H](CO)NC(=O)CCNC1=O
BGC0001424	Myxococcus	myxochromide c	1	774.432	197.31	3.0051	8	4	NRP		0	0	0	0	24	C1(=O)N[C@@H](CC(C)C)C(N2CCC[C@H]2C(=O)N[C@@H](CCC(=O)N)C(=O)O[C@H](C)[C@H](N(C)C(=O)/C=C/C=C/C=C/C=C/C=C/C=C/C=C/C=C/C)C(=O)N[C@@H]1C)=O
BGC0000571	Paraburkholderia	burhizin	1	-1					RiPP		0	0	0	0	4
BGC0001216	Streptomyces	splenocin	1	-1					NRP		1	0	0	0	16
BGC0001492	Streptomyces	abyssomicin m	12	-1					Polyketide		1	0	0	0	32
BGC0000346	Goodfellowiella	epoxomicin	1	554.368	157.44	1.1648	7	4	NRP	Cytotoxic,Inhibitor	1	0	0	0	8	CC[C@H](C)[C@@H](C(=O)N[C@@H]([C@@H](C)O)C(=O)N[C@@H](CC(C)C)C(=O)[C@]1(CO1)C)NC(=O)[C@H]([C@@H](C)CC)N(C)C(=O)C
BGC0000982	Cystobacter	cystothiazole a	1	422.133	70.54	4.7576	8	0	NRP		0	0	0	0	17	CO[C@@H](\C=C\C1=CSC(=N1)C1=CSC(=N1)C(C)C)[C@@H](C)C(\OC)=C/C(=O)OC
BGC0001736	Photorhabdus	pepteridine a	2	-1					NRP		0	0	0	0	8
BGC0000762	Rhizobium	exopolysaccharide	1	-1					Saccharide		0	0	0	0	21
BGC0001914	Streptomyces	benzastatin j	11	-1					Other		1	0	0	0	10
BGC0001064	Cylindrospermum	cylindrocyclophane d	3	668.429	133.52	10.3718	8	4	Polyketide	Cytotoxic	0	0	0	0	12	OC1=C2C(O)=CC([C@H](OC(C)=O)[C@@H](C)CCCC[C@H](CCCC)C(C(O)=C3)=C(O)C=C3[C@H](OC(C)=O)[C@@H](C)CCCC[C@@H]2CCCC)=C1
BGC0000563	Streptomyces	venezuelin	1	-1					RiPP		1	0	0	0	4
BGC0000776	Escherichia	lipopolysaccharide	1	4897.15	1888.75	-9.9821	107	62	Saccharide		0	0	0	0	11	CCCCCCCCCCCCCCCC1[C@H](OC([C@H]([C@@H]1OC(=O)CC(CCCCCCCCCCC)O)O)CO[C@H]2[C@H](C([C@@H](C(O2)CO[C@@]3(CC([C@H](C(O3)C(CO)O)O[C@H]4[C@@H](C([C@@H](C(O4)C(CO)O)OP(=O)(O)OP(=O)(O)OCCN)O[C@@H]5[C@@H](C([C@@H](C(O5)C(CO[C@@H]6[C@@H](C([C@](CO6)(C(CO)O)O)O)O)O)OP(=O)(O)O)O[C@@H]7C(C([C@@H](C(O7)CO[C@@H]8C(C([C@H](C(O8)CO)O)O)O)O)O[C@@H]9C(C([C@H](C(O9)CO)O)O)O[C@@H]1C(C([C@@H](C(O1)CO)O[C@@H]1C(C([C@H](…
BGC0001589	Burkholderia	exopolysaccharides	1	-1					Saccharide		0	0	0	0	22
BGC0000896	Streptomyces	cycloserine	1	102.043	64.35	-1.6249	3	2	Other		1	0	0	0	22	N[C@@H]1CONC1=O
BGC0000469	Streptomyces	bottromycin a2	1	822.446	200.29	3.4771	10	5	RiPP		1	0	0	0	33	[H][C@@]12[C@H](C)CCN1C(=O)CN\C(=N/[C@H](C(=O)N[C@@H]([C@@H](C)C1=CC=CC=C1)C(=O)N[C@H](CC(=O)OC)C1=NC=CS1)C(C)(C)C)[C@@H](NC(=O)[C@@H](NC2=O)C(C)C)C(C)(C)C
BGC0000888	Bacillus	bacilysin	1	270.122	122.02	-0.9604	5	3	Other		1	0	0	0	5	CC(N)C(=O)NC(C[C@H]1CCC(=O)[C@@H]2O[C@H]12)C(O)=O
BGC0000349	Saccharopolyspora	erythrochelin	1	603.286	258.25	-3.0148	11	8	NRP		1	0	0	1	7	CC(=O)N[C@H](CCCN(O)C(C)=O)C(=O)N[C@H](CO)C(=O)N(O)CCC[C@@H]1NC(=O)[C@H](CCCN(O)C(C)=O)NC1=O
BGC0000094	Streptomyces	methymycin	1	469.304	105.53	2.3077	8	2	Polyketide	Antibacterial	1	1	0	0	7	CC[C@H]1OC(=O)[C@H](C)[C@@H](O[C@@H]2O[C@H](C)C[C@@H]([C@H]2O)N(C)C)[C@@H](C)C[C@@H](C)C(=O)\C=C\[C@]1(C)O
BGC0001884	Fischerella	aranazole a	4	-1					NRP		0	0	0	0	16
BGC0000230	Streptomyces	griseorhodin a	1	476.074	145.03	2.37092	10	2	Polyketide	Antibacterial,Cytotoxic,Inhibitor,anti-viral	1	1	0	0	33	CC1=CC2=CC3=C(C(=C2C(=O)O1)O)OC4(C5C3O5)C(C6=C(O4)C=C7C(=C6)C(=O)C=C(C7=O)OC)O
BGC0000567	Rhizobium	trifolitoxin	1	-1					RiPP		0	0	0	0	7
BGC0000232	Streptomyces	hatomarubigin a	4	336.1	80.67	2.9412	5	1	Polyketide		1	0	0	0	33	C[C@H]1CC2=CC(=C3C(=C2C(=O)C1)C(=O)C4=C(C3=O)C(=CC=C4)OC)O
BGC0001942	Streptomyces	malonomycin	1	-1					NRP		1	0	0	0	18
BGC0000928	Cylindrospermopsis	t3 toxin	1	-1					Other		0	0	0	0	34
BGC0000008	Aspergillus	aflatoxin	1	328.058	84.2	1.8605	7	0	Polyketide		2	0	0	0	23	COC1=C2C3=C(C(=O)OCC3)C(=O)OC2=C4C5C=COC5OC4=C1
BGC0000222	Streptomyces	fd-594	1	940.336	292.19	3.3522	20	8	Polyketide		1	0	0	0	46	CCCC1CC2=CC3=C(C(O)=C2C(=O)O1)C1=C(O)C2=C(OC4=C(C(O)=C(O[C@H]5C[C@@H](O)[C@H](O[C@H]6C[C@@H](O)[C@H](O[C@H]7C[C@@H](OC)[C@H](O)[C@@H](C)O7)[C@@H](C)O6)[C@@H](C)O5)C=C4)C2=O)C(OC)=C1C(O)C3O
BGC0001431	Stigmatella	myxochromide s	1	722.4	206.1	1.9626	8	5	NRP		0	0	0	0	20	CC(C[C@@H]1NC([C@@H](N(C)C(=O)/C=C/C=C/C=C/C=C/C=C/C=C/C=C/C)[C@@H](C)OC(=O)[C@H](CCC(=O)N)NC([C@H](C)NC(=O)[C@H](C)NC1=O)=O)=O)C
BGC0000046	Alternaria	depudecin	1	212.105	65.52	0.0051	4	2	Polyketide	Inhibitor	2	0	0	0	6	C[C@@H](O)[C@@H]1O[C@H]1\C=C\[C@@H]1O[C@H]1[C@H](O)C=C
BGC0000004	Aspergillus	aflatoxin g1	1	328.058	84.2	1.8605	7	0	Polyketide		2	0	0	0	23	[H][C@@]12OC=C[C@]1([H])C1=C(O2)C=C(OC)C2=C1OC(=O)C1=C2CCOC1=O
BGC0000339	Streptomyces	echinomycin	1	1100.42	301.8	0.6353	18	4	NRP		1	0	0	0	18	C[C@@H]1C(=O)N([C@H]2CSC([C@@H](C(=O)N([C@H](C(=O)OC[C@H](C(=O)N1)NC(=O)C3=NC4=CC=CC=C4N=C3)C(C)C)C)N(C(=O)[C@H](NC(=O)[C@@H](COC(=O)[C@@H](N(C2=O)C)C(C)C)NC(=O)C5=NC6=CC=CC=C6N=C5)C)C)SC)C
BGC0000146	Alternaria	solanapyrone d	1	302.152	56.51	3.5568	4	0	Polyketide		2	0	0	0	6	[H][C@@]12CCCC[C@@]1([H])[C@@H]([C@H](C)C=C2)C1=CC(OC)=C(C=O)C(=O)O1
BGC0000237	Streptomyces	lactonamycin z	1	585.148	198.59	-0.1137	13	4	Polyketide		1	0	0	0	15	COC12CC(=O)OC11C(=O)C3=C(O)C4=C5CN(C)C(=O)C5=C(O)C=C4C=C3C(=O)C1(CO2)OC1CC(O)C(O)C(C)O1
BGC0000791	Cronobacter	o-antigen	1	-1					Saccharide		0	0	0	0	13
BGC0000162	Micromonospora	tetrocarcin a	1	782.363	221.06	4.2072	13	4	Polyketide		1	0	0	0	45	C[C@H]1C[C@@H]([C@@H]([C@@H]2[C@@H]1[C@]3([C@@H](C=C2)/C(=C\C[C@@H](/C(=C/[C@@H]4[C@H](C=C(CC45C(=O)C(=C(O5)O)C3=O)C=O)O)/C)O[C@H]6C[C@]([C@H]([C@H](O6)C)NC(=O)OC)(C)[N+](=O)[O-])/C)C)O)C
BGC0000506	Bacillus	entianin	1	3346.59	1217.05	-8.5231	45	40	RiPP	Antibacterial,Signalling	1	1	0	0	11	NC(CC1=CNC2=C1C=CC=C2)C(NC(CCCCN)C(NC(CSCC(C(NC(C5C)C(N4C(C(NC([H])C(NC(CS5)C(NC(C(C)C)C(NC(C6C)C(NC([H])C(NC(CC(C)C)C(NC(CC(C)C)C(NC(CCC(N)=O)C(NC(C(NC(CS6)C(NC(CC7=CC=CC=C7)C(NC(CC(C)C)C(NC(CCC(N)=O)C(NC(C8C)C(NC(C(CC)C)C(NC(C9C)C(NC(CS8)C(NC(CC(N)=O)C(NC(CS9)C(NC(CCCCN)C(NC(C(CC)C)C(NC(C(NC(CCCCN)C(O)=O)=O)=C)=O)=O)=O)=O)=O)=O)=O)=O)=O)=O)=O)=O)=O)=CC)=O)=O)=O)=O)=O)=O)=O)=O)=O)CCC4)=O)=O)NC3=…
BGC0001236	Streptomyces	thiotetroamide	1	-1					Polyketide		1	0	0	0	17
BGC0001638	Klebsiella	klebsazolicin	1	-1					RiPP		0	0	0	0	5
BGC0000714	Micromonospora	sisomicin	1	447.269	213.72	-3.8515	12	8	Saccharide		1	0	0	0	37	CN[C@@H]1[C@@H](O)[C@@H](O[C@H]2[C@H](N)C[C@H](N)[C@@H](O[C@H]3OC(CN)=CC[C@H]3N)[C@@H]2O)OC[C@]1(C)O
BGC0001588	Burkholderia	exopolysaccharides	1	-1					Saccharide		0	0	0	0	22
BGC0001807	Streptomyces	totopotensamide a	2	1145.55	410.3	-1.89788	19	15	NRP		1	0	0	0	39	CC[C@H](C)[C@H]1C(=O)NCC(=O)N[C@@H]([C@H](C(=O)N[C@@H](C(=O)N1)C2=CC(=C(C(=C2Cl)O)C)O)NC(=O)[C@H](C)NC(=O)[C@@H]([C@@H](C)O)NC(=O)CC(=O)C(C)CC(C)C[C@H](C)[C@H]([C@H](C)[C@@H]([C@@H](C)O)O[C@H]3[C@@H]([C@H]([C@@H]([C@H](O3)CO)OC)O)O)O)C
BGC0000983	Aspergillus	cytochalasin e	2	495.226	114.46	3.0889	7	2	NRP	Inhibitor	2	0	0	0	13	[H][C@@]12O[C@]1(C)[C@@H](C)[C@@]1([H])[C@H](CC3=CC=CC=C3)NC(=O)[C@]11OC(=O)O\C=C\[C@@](C)(O)C(=O)[C@@H](C)C\C=C\[C@@]21[H]
BGC0000417	Rhodococcus	rhodochelin	1	571.213	269.36	-1.7198	12	8	NRP		1	0	0	1	6	CC(OC(=O)[C@@H](N)CCCN(O)C=O)[C@H](NC(=O)C1=C(O)C(O)=CC=C1)C(=O)N[C@@H](CCCN(O)C=O)C(O)=O
BGC0000752	Actinobacillus	capsular polysaccharide	1	496.119	265.52	-5.2059	14	10	Saccharide		0	0	0	0	6	CCCO[C@@H]1C([C@]([C@H]([C@H](O1)CO)O[C@H]2[C@@H]([C@H]([C@H]([C@H](O2)CO)O)O)O)(O)OP(=O)(O)O)(O)O
BGC0000166	Streptomyces	tylactone	1	394.272	83.83	3.8299	5	2	Polyketide		1	0	0	0	13	CC[C@@H]1C[C@H](C(=O)/C=C/C(=C/[C@H]([C@H](OC(=O)C[C@H]([C@H]([C@H]1O)C)O)CC)C)/C)C
BGC0002022	Streptomyces	armeniaspirol a	3	-1					Polyketide		1	0	0	0	36
BGC0000719	Streptoalloteichus	tobramycin	1	467.259	268.17	-6.2958	14	10	Saccharide		1	1	0	0	9	C1[C@@H]([C@H]([C@@H]([C@H]([C@@H]1N)O[C@@H]2[C@@H]([C@H]([C@@H]([C@H](O2)CO)O)N)O)O)O[C@@H]3[C@@H](C[C@@H]([C@H](O3)CN)O)N)N
BGC0000847	Streptomyces	thienamycin	1	272.083	103.86	-0.414	5	3	Other	Antibacterial	1	1	0	0	30	C[C@@H](O)C1[C@H]2CC(SCCN)=C(N2C1=O)C(O)=O
BGC0000520	Lactococcus	lacticin 3147 a1	2	-1					RiPP	Antibacterial	1	1	0	0	4
BGC0001207	Eleftheria	teixobactin	1	1241.71	463.29	-4.2586	19	16	NRP		0	1	0	0	10	CC[C@H](C)[C@H](NC(=O)[C@@H](CC1=CC=CC=C1)NC)C(=O)N[C@@H](CO)C(=O)N[C@H](CCC(N)=O)C(=O)N[C@H]([C@H](C)CC)C(=O)N[C@@H]([C@@H](C)CC)C(=O)N[C@@H](CO)C(=O)N[C@@H]1[C@H](C)OC(=O)[C@@H](NC(=O)[C@H](C[C@H]2CN=C(N)N2)NC(=O)[C@H](C)NC1=O)[C@@H](C)CC
BGC0000212	Streptomyces	cinerubin b	1	825.321	226.28	2.8797	17	4	Polyketide	Cytotoxic	1	0	0	0	35	[H][C@]12C[C@H](O[C@@H]3[C@H](C)O[C@H](C[C@@H]3N(C)C)O[C@H]3C[C@](O)(CC)[C@H](C(=O)OC)C4=CC5=C(C(O)=C34)C(=O)C3=C(O)C=CC(O)=C3C5=O)O[C@@H](C)[C@@]1([H])O[C@]1([H])O[C@@H](C)C(=O)C[C@]1([H])O2
BGC0001826	Xenorhabdus	xeneprotides a-c	1	-1					NRP		0	0	0	0	9
BGC0000294	Acinetobacter	acinetobactin	1	346.128	131.27	0.8153	7	4	NRP		0	0	0	1	23	CC1OC(=NC1C(=O)N(O)CCC1=CNC=N1)C1=CC=CC(O)=C1O
BGC0000848	Streptomyces	a-factor	1	242.152	63.6	1.5534	4	1	Other		1	0	0	0	1	CC(C)CCCCC(=O)C1[C@@H](COC1=O)CO
BGC0001536	Brevibacillus	brevicidine	1	-1					NRP		1	1	0	0	11
BGC0001268	Fusarium	fusarin	1	387.205	99.16	2.2552	5	3	NRP		2	0	0	0	1	C/C=C(/C)\C=C(/C)\C=C(/C)\C=C\C=C(/C)\C(=O)[C@@]12[C@@H](O1)[C@](NC2=O)(CCO)O
BGC0001429	Stigmatella	myxochromide s1	1	722.4	206.1	1.9626	8	5	NRP		0	0	0	0	20	C\C=C\C=C\C=C\C=C\C=C\C=C\C=C\C(=O)N(C)[C@H]1[C@@H](C)OC(=O)[C@H](CCC(N)=O)NC(=O)[C@H](C)NC(=O)[C@H](C)NC(=O)[C@H](CC(C)C)NC1=O
BGC0000816	Malbranchea	malbrancheamide a	1	369.161	48.13	3.3781	2	2	NRP	Inhibitor	2	0	0	0	7	CC1(C)[C@@H]2C[C@]34CCCN3C[C@@]2(CC2=C1NC1=CC(Cl)=CC=C21)NC4=O
BGC0000870	Mycobacterium	mycolic acid	1	-1					Other		1	0	0	0	4
BGC0000123	Streptomyces	phoslactomycin b	1	513.249	159.54	3.0519	7	5	Polyketide		1	0	0	0	28	CC[C@H]1C=CC(=O)O[C@@H]1\C=C\C(O)(CCN)[C@@H](C[C@@H](O)\C=C/C=C\C1CCCCC1)OP(O)(O)=O
BGC0002010	Streptomyces	streptophenazine b	5	-1					NRP		1	0	0	0	28
BGC0000574	Caulobacter	caulosegnin i	3	-1					RiPP		0	0	0	0	7
BGC0000849	Streptomyces	scb1	3	244.167	66.76	1.3452	4	2	Other		1	0	0	0	2	CC(C)CCCC[C@@H](O)[C@H]1[C@H](CO)COC1=O
BGC0001685	Raoultella	n-acyloxyacyl lysine	1	-1					Other		0	0	0	0	2
BGC0000884	Pseudomonas	3-methylarginine	1	189.135	133.78	-5.273	2	4	Other		0	0	0	0	3	CC(CC[NH+]=C(N)N)C(C(=O)[O-])[NH3+]
BGC0000868	Bacillus	teichuronic acid	1	-1					Other		1	0	0	0	8
BGC0000492	Lactococcus	lactocyclicin q	1	-1					RiPP		1	0	0	0	1
BGC0000664	Streptomyces	isorenieratene	1	528.376	0	11.7175	0	0	Terpene		1	0	0	0	7	CC1=C(C(=C(C=C1)C)/C=C/C(=C/C=C/C(=C/C=C/C=C(/C=C/C=C(/C=C/C2=C(C=CC(=C2C)C)C)\C)\C)/C)/C)C
BGC0001905	Streptomyces	violapyrone b	1	-1					Polyketide		1	0	0	0	7
BGC0000823	Lentzea	rebeccamycin	1	569.076	146.04	3.2459	8	5	Alkaloid		1	0	0	0	11	CO[C@@H]1[C@H](O[C@H]([C@@H]([C@H]1O)O)N2C3=C(C=CC=C3Cl)C4=C5C(=C6C7=C(C(=CC=C7)Cl)NC6=C42)C(=O)NC5=O)CO
BGC0000660	Streptomyces	albaflavenone	1	218.167	17.07	3.7381	1	0	Terpene		1	0	0	0	2	C[C@H]1CC(=O)C2=C(C)C(C)(C)[C@H]3CC[C@@]12C3
BGC0001201	Sorangium	eremophilene	1	204.188	0	4.7252	0	0	Terpene		0	0	0	0	2	C[C@@H]1CCC=C2CC[C@@H](C[C@@]12C)C(C)=C
BGC0001322	Solanum	lycosantalonol	1	304.24	37.3	4.5153	2	1	Terpene		3	0	0	0	19	CC(=CCCC(C)(C(=O)CC[C@@]1(C2CC3C1(C3C2)C)C)O)C
BGC0001032	Serratia	oocydin a	1	-1					NRP		0	0	0	0	23
BGC0000160	Aspergillus	terreic acid	1	154.027	66.9	-0.2624	4	1	Polyketide		2	0	0	0	9	[H][C@]12O[C@@]1([H])C(=O)C(O)=C(C)C2=O
BGC0001169	Streptomyces	piericidin a1	1	415.272	71.55	5.04512	4	2	Polyketide		1	0	0	0	12	C/C=C(\C)/[C@@H]([C@H](C)/C=C(\C)/C=C/C/C(=C/CC1=C(C(=O)C(=C(N1)OC)OC)C)/C)O
BGC0000797	Sphingomonas	sphingan polysaccharide	1	-1					Saccharide		0	0	0	0	23
BGC0000499	Butyrivibrio	butyrivibriocin or79	1	-1					RiPP		1	0	0	0	6
BGC0001242	Fusarium	oxyjavanicin	1	306.074	113.29	0.7883	7	3	Polyketide		2	0	0	0	8	COC1=CC(=O)C2=C(O)C3=C(CC(C)(O)OC3)C(O)=C2C1=O
BGC0000969	Chondromyces	chondramide a	1	646.337	150.06	4.1741	7	4	NRP		0	0	0	0	13	CO[C@H]1C(NC(=O)[C@@H](CC2=CNC3=CC=CC=C23)N(C)C(=O)[C@H](C)NC(=O)[C@@H](C)CC(C)=C[C@H](C)[C@@H](C)OC1=O)C1=CC=C(O)C=C1
BGC0001706	Hypoxylon	nodulisporic acid f	1	435.277	73.32	5.9863	2	3	Terpene		2	0	0	0	13	[H][C@]12CC3=C(NC4=C3C=CC=C4)[C@]1(C)[C@@]1(C)CC[C@H](O)[C@@](C)(CC\C=C(/C)C(O)=O)[C@]1([H])CC2
BGC0001779	Streptomyces	siamycin	1	2161.85	747.74	-5.5595	29	26	RiPP		1	0	0	0	6	CC[C@H](C)[C@H]1C(=O)N[C@H](C(=O)N[C@@H](CSSC[C@H]2C(=O)N[C@H](C(=O)N[C@H]3CC(=O)N[C@@H](CSSC[C@@H](C(=O)NCC(=O)N[C@H](C(=O)N[C@H](C(=O)N1)C)CC4=CC=C(C=C4)O)NC(=O)CNC(=O)[C@@H](NC(=O)[C@@H](NC3=O)CC5=CC=CC=C5)C)C(=O)N[C@H](C(=O)NCC(=O)N[C@H](C(=O)NCC(=O)N[C@H](C(=O)N2)CO)C(C)C)CC(C)C)CC(=O)N)C(=O)N[C@@H](CC6=CC=CC=C6)C(=O)N[C@@H](CC7=CNC8=CC=CC=C87)C(=O)O)C(C)C
BGC0000027	Monascus	ankaflavin	4	386.209	69.67	4.2235	5	0	Polyketide		2	0	0	0	24	CCCCCCCC(=O)C1C2CC3=C(COC(\C=C\C)=C3)C(=O)C2(C)OC1=O
BGC0000187	Streptomyces	asukamycin	1	546.237	145.33	3.2339	7	4	Polyketide	Antibacterial,Cytotoxic,Pigment	1	1	0	0	62	OC1=C(NC(=O)\C=C\C=C/C=C\[C@]2(O)C=C(NC(=O)\C=C\C=C\C=C\C3CCCCC3)C(=O)C3OC23)C(=O)CC1
BGC0000490	Lactococcus	garvicin ml	1	-1					RiPP		1	0	0	0	6
BGC0001205	Penicillium	communesin a	7	456.253	51.35	3.5799	5	1	Polyketide		2	0	0	0	16	[H][C@]12NC3=CC=CC=C3[C@@]34CCN(C(C)=O)[C@]3([H])N3CC[C@]14C1=C(C=CC=C1[C@H]3C1OC1(C)C)N2C
BGC0001898	Streptomyces	thioplatensimycin	2	-1					Terpene		1	0	0	0	41
BGC0000911	Streptomyces	melanin	1	318.064	99.86	1.32664	4	2	Other		1	0	0	0	2	CC1=C2C3=C(C4=CNC5=C(C(=O)C(=O)C(=C45)C3=CN2)C)C(=O)C1=O
BGC0001281	Ustilago	ustilagic acid	1	784.409	288.66	-0.2125	17	9	Polyketide		2	0	0	0	114	CCCC(CC(=O)OC1[C@H]([C@@H](C(O[C@H]1O[C@H]2[C@@H](C([C@@H](OC2COC(=O)C)OCC(CCCCCCCCCCCCC(C(=O)O)O)O)O)O)CO)O)O)O
BGC0000108	Streptomyces	natamycin	1	665.305	230.99	0.1197	13	7	Polyketide		1	0	1	0	22	C[C@@H]1CC=CC=CC=CC=C[C@@H](C[C@H]2[C@@H]([C@H](C[C@](O2)(C[C@H](C[C@@H]3[C@H](O3)C=CC(=O)O1)O)O)O)C(=O)O)O[C@H]4[C@H]([C@H]([C@@H]([C@H](O4)C)O)N)O
BGC0001390	Stachybotrys	ll-z1272beta	1	356.235	57.53	6.18042	3	2	NRP		2	0	0	0	3	CC1=CC(=C(C(=C1C=O)O)C/C=C(\C)/CC/C=C(\C)/CCC=C(C)C)O
BGC0001655	Nocardiopsis	lp2006	1	2003.85	822.3	-7.98256	26	29	RiPP		1	0	0	0	6	CC(C)[C@H]1C(=O)N[C@H](C(=O)N[C@H](C(=O)N[C@@H](CSSC[C@@H](C(=O)N1)NC(=O)[C@H](CO)NC(=O)[C@H](CC2=CNC3=CC=CC=C32)NC(=O)[C@H](CC(=O)O)NC(=O)[C@H](CC(=O)N)NC(=O)[C@@H]4CCC(=O)NCC(=O)N[C@H](C(=O)N5CCC[C@H]5C(=O)N[C@H](C(=O)N[C@H](C(=O)NCC(=O)N[C@H](C(=O)N4)CC6=CC=CC=C6)CC7=CNC8=CC=CC=C87)CC(=O)N)CCCNC(=N)N)C(=O)O)C(C)C)CCCNC(=N)N
BGC0001295	Streptomyces	cremeomycin	1	194.033	100	-0.2188	3	1	Other		1	1	0	0	14	COC1=CC=C(C(O)=O)C(=O)C1=[N+]=[N-]
BGC0001489	Cladonia	6-hydroxymellein	1	194.058	66.76	1.1992	4	2	Polyketide		2	0	0	0	6	C[C@@H]1CC2=CC(=CC(=C2C(=O)O1)O)O
BGC0000463	Pseudomonas	xantholysin a	3	1775.08	663.59	-1.0427	22	20	NRP	Antibacterial,Antifungal	0	1	1	0	4	CCCCCCCC(O)CC(NC(CC(C)C)C(NC(CCC(O)=O)C(NC(CCC(N)=O)C(NC(C(C)C)C(NC(CC(C)C)C(NC(CCC(N)=O)C(NC(CO1)C(NC(C(C)C)C(NC(CC(C)C)C(NC(CCC(N)=O)C(NC(CC(C)C)C(NC(CC(C)C)C(NC(CCC(N)=O)C(NC(C(CC)C)C1=O)=O)=O)=O)=O)=O)=O)=O)=O)=O)=O)=O)=O)=O)=O
BGC0001764	Streptomyces	s56-p1	1	-1					NRP		1	0	0	0	51
BGC0001713	Ochrobactrum	ochrobactin	1	-1					Other		0	0	0	1	7
BGC0000275	Streptomyces	tetracenomycin c	1	472.101	176.89	-0.03588	11	4	Polyketide	Antibacterial,Cytotoxic	1	1	0	0	12	O[C@H]1[C@@]2(O)[C@@](C(C(C(O)=C(C(C)=C(C(OC)=O)C(OC)=C4)C4=C3)=C3C2=O)=O)(O)C(C=C1OC)=O
BGC0001177	Streptomyces	mensacaricin	1	420.142	138.35	-0.4542	9	3	Polyketide	Cytotoxic	1	0	0	0	26	C[C@H]1[C@H]([C@@]23C(=O)C4=C([C@@H]([C@@]2(O3)[C@H]([C@@]1(C(=O)[C@H]5[C@@H](O5)C)O)O)OC)C(=CC=C4)OC)O
BGC0001388	Lactobacillus	gassericin e	1	-1					RiPP		1	0	0	0	9
BGC0001493	Streptomyces	achromosin	1	-1					RiPP		1	0	0	0	4
BGC0001782	Streptomyces	spiroindimicin a	13	479.044	96.54	5.4067	5	2	Other		1	0	0	0	33	COC(=O)C1=C2C3=CNC4=C3C(=C(Cl)C=C4)[C@@]3(C=NC4=CC=C(Cl)C=C34)C2=C(N1)C(=O)OC
BGC0001757	Xenorhabdus	rhabduscin	1	332.137	92.38	0.92669	5	3	Other		0	0	0	0	3	C[C@H]1[C@H]([C@H]([C@@H]([C@H](O1)OC2=CC=C(C=C2)/C=C/[N+]#[C-])O)O)NC(=O)C
BGC0001682	Pseudomonas	n-acyl lysine/ornithine	1	-1					Other		0	0	0	0	2
BGC0000758	Staphylococcus	capsular polysaccharide	1	-1					Saccharide		1	0	0	0	61
BGC0001579	Streptomyces	duramycin	1	2011.84	760.09	-9.2159	29	25	RiPP	Antibacterial	1	1	0	0	8	C[C@@H]1[C@H]2C(=O)N[C@H](C(=O)N[C@H](C(=O)N[C@H]3CSC[C@H]4C(=O)N[C@@H](CS1)C(=O)N[C@@H](CNCCCC[C@H](NC(=O)[C@H]([C@H](SC[C@@H](C(=O)N[C@H](C(=O)N[C@H](C(=O)N4)CCC(=O)N)CCCCN)N)C)NC(=O)[C@@H](NC(=O)CNC(=O)[C@@H](NC3=O)[C@H](C(=O)O)O)CC(=O)N)C(=O)O)C(=O)N[C@H](C(=O)NCC(=O)N5CCC[C@H]5C(=O)N[C@H](C(=O)N2)CC6=CC=CC=C6)CC7=CC=CC=C7)C(C)C)CC8=CC=CC=C8
BGC0001005	Bacillus	locillomycin	1	-1					NRP		1	0	0	0	14
BGC0000083	Streptomyces	lactimidomycin	4	457.246	109.77	3.3421	6	2	Polyketide	Antifungal,Cytotoxic,Inhibitor	1	0	1	0	9	C[C@@H](\C=C(/C)C1OC(=O)\C=C\CC\C=C\C=C/[C@@H]1C)C(=O)C[C@H](O)CC1CC(=O)NC(=O)C1
BGC0000932	Phaeobacter	tropodithietic acid	1	-1					Other		0	0	0	0	19
BGC0001198	Herpetosiphon	(+)-o-methylkolavelool	1	304.277	9.23	6.1565	1	0	Terpene		1	0	0	0	3	C[C@H]1CC[C@]2([C@H]([C@]1(C)CCC(C)(C=C)OC)CCC=C2C)C
BGC0000840	Xanthomonas	xanthomonadin i	1	572.056	35.53	8.2861	3	0	Other		0	0	0	0	14	COC1=C(Br)C=CC(=C1)C(\Br)=C\C=C\C=C\C=C\C=C\C=C\C=C\C=C\C(=O)OCC(C)C
BGC0000344	Pseudomonas	entolysin	1	-1					NRP		0	0	0	0	23
BGC0000702	Streptomyces	kanamycin	1	484.238	282.61	-7.2914	15	11	Saccharide		1	1	0	0	24	C1[C@H]([C@@H]([C@H]([C@@H]([C@H]1N)O[C@@H]2[C@@H]([C@H]([C@@H]([C@H](O2)CN)O)O)O)O)O[C@@H]3[C@@H]([C@H]([C@@H]([C@H](O3)CO)O)N)O)N
BGC0000022	Aspergillus	asperfuranone	1	332.162	87.74	2.8616	5	2	Polyketide		2	0	0	0	11	CCC(C)C=C(C)C=CC(=O)C1=C2CC(O)C(C)(O)C(=O)C2=CO1
BGC0001174	Corynebacterium	corynazolicin	1	1336.25	378.37	9.10371	27	7	RiPP	Antibacterial	1	1	0	0	7	O=C(NCC(NCC(O)=O)=O)C1=CSC(C2=CSC(C3=CSC(C4=CSC(C5=CSC([C@@H]6CCCN6C([C@@H](NC(C7=C(C)OC(C8=C(C)OC(C9=CSC(C%10=COC(C%11=CSC([C@@H](N(C)C)CCCNC(N)=N)=N%11)=N%10)=N9)=N8)=N7)=O)[C@H](CC)C)=O)=N5)=N4)=N3)=N2)=N1
BGC0000523	Lactobacillus	lactocin s	1	3761.88	1329.08	-7.7887	50	44	RiPP		1	0	0	0	19	CSCCC(NC(=O)C(C)NC(=O)C(NC(=O)C(C)NC(=O)C(NC(=O)C(C)NC(=O)C(C)NC(=O)C(CC(C)C)NC(=O)C(NC(=O)C1CCCN1C(=O)C(\NC(=O)C(C)=O)=C/C)C(C)C)C(C)C)C(C)C)C(=O)NC(CCC(O)=O)C(=O)NC(CC(C)C)C(=O)NC(CC(C)C)C(=O)N1CCCC1C(=O)NC(C(C)O)C(=O)NC(C)C(=O)NC(C)C(=O)NC(C(C)C)C(=O)NC(CC(C)C)C(=O)NC(CC1=CC=C(O)C=C1)C(=O)NC1CSCC(NC(=O)CNC(=O)C(C)NC(=O)C(NC(=O)C(CC(O)=O)NC1=O)C(C)C)C(=O)NC(CC1=CC=CC=C1)C(=O)NC(CCCCN)C(=O)NC(CC…
BGC0000879	Streptomyces	toyocamycin	2	291.097	150.44	-1.50332	9	4	Other		1	0	0	0	12	NC1=NC=NC2=C1C(=CN2[C@@H]1O[C@H](CO)[C@@H](O)[C@H]1O)C#N
BGC0000121	Pestalotiopsis	res-1214-2	1	382.046	122.52	3.34532	7	3	Polyketide		2	0	0	0	16	COC(=O)C1=CC(OC)=C(Cl)C(O)=C1OC1=C(C(O)=O)C(O)=CC(C)=C1
BGC0000477	uncultured	patellin 2	2	732.424	167.53	2.8856	9	4	RiPP		3	0	0	0	8	CC(C)C[C@H]1C2=N[C@H](CS2)C(=O)N[C@H](C(=O)N[C@H](C(=O)N3CCC[C@H]3C(=O)N[C@H](C(=O)N1)C(C)OC(C)(C)C=C)C(C)C)C(C)OC(C)(C)C=C
BGC0000883	Streptomyces	arginomycin	1	436.218	215.67	-1.97273	9	6	Other		1	0	0	0	29	CC(CCN(C)C(=N)N)C(C(=O)NC1C=CC(OC1C(=O)O)N2C=CC(=NC2=O)N)N
BGC0000936	Pseudomonas	pyocyanine	1	210.079	34.89	2.0383	3	0	Other		0	0	0	0	7	CN1C2=CC=CC=C2N=C2C(=O)C=CC=C12
BGC0000140	Streptomyces	4-hexadecanoyl-3-hydroxy-2-(hydroxymethyl)-2h-furan-5-one	1	368.256	83.83	4.7666	5	2	Polyketide		1	0	0	0	11	CCCCCCCCCCCCCCCC(=O)C1=C(O)C(CO)OC1=O
BGC0001877	Streptomyces	cyphomycin	1	1462.82	433.18	5.1267	26	14	Polyketide	Antifungal	1	0	1	0	72	CCC(OC1CC(C)(O)C(OC2CCC(OC(=O)C(C)C(O)C3=CC4=C(C=C3)C(=O)C(C)=CC4=O)C(C)O2)C(C)O1)C(C)C(O)C(C)C(O)C(C)C1OC(=O)\C=C\C(C)C(O)CC(O)CCCC(O)CCC(C)C(O)C(=O)C2(O)CC(O)CC(CC(O)CC(O)CC(O)CCCC(O)\C=C\C1C)O2
BGC0001363	Ralstonia	ralsolamycin	1	-1					NRP		0	0	0	0	5
BGC0001571	Nodulisporium	demethoxyviridin	1	322.084	84.58	2.2062	5	1	Terpene		2	0	0	0	26	C[C@]12[C@@H](CC(=O)C3=COC(=C31)C(=O)C4=C2C=CC5=C4CCC5=O)O
BGC0002025	Jahnella	thaxteramide c	1	-1					NRP		0	0	0	0	26
BGC0000674	Streptomyces	(-)-δ-cadinene	1	204.188	0	4.7252	0	0	Terpene		1	0	0	0	4	CC1=C[C@@H]2[C@H](CCC(=C2CC1)C)C(C)C
BGC0001209	Streptococcus	streptide	1	988.48	401.25	-2.8677	14	14	RiPP		1	0	0	0	4	C[C@@H](C(=O)N[C@H]1[C@H](C2=CC=CC3=C2NC=C3C[C@H](NC(=O)CNC(=O)[C@@H](NC(=O)CNC1=O)CC(=O)O)C(=O)N[C@@H](CCCCN)C(=O)N[C@@H](C(C)C)C(=O)N[C@@H](CCSC)C(=O)O)CCCN)N
BGC0000557	Streptococcus	streptococcin a-ff22	1	-1					RiPP		1	0	0	0	10
BGC0001480	Methylobacter	tundrenone	1	420.178	130.36	1.8268	8	3	Other		0	0	0	0	18	O[C@@H]1C=CC([C@](C2)([H])[C@H]1OC(C(OCC(C(O)C(CCCCC)=O)=C)=O)=C)=C(O)C2=O
BGC0001978	Aspergillus	burnettramic acid	1	-1					NRP		2	0	0	0	9
BGC0001176	Streptomonospora	streptomonomicin	1	2233.17	786.5	-4.9134	29	26	RiPP	Antibacterial	1	1	0	0	5	CC[C@H](C)[C@H](NC(=O)[C@H](CC(C)C)NC(=O)[C@H](C)NC(=O)[C@@H]1CCCN1C(=O)[C@H](CC1=CC=C(O)C=C1)NC(=O)CNC(=O)[C@H](CC(C)C)NC(=O)[C@@H](NC(=O)[C@@H]1CC(=O)N[C@@H](CO)C(=O)N[C@@H](CC(C)C)C(=O)NCC(=O)N[C@@H](CO)C(=O)N[C@@H](CO)C(=O)N2CCC[C@H]2C(=O)N[C@@H](CC2=CC=C(O)C=C2)C(=O)N[C@@H](CC(N)=O)C(=O)N1)[C@@H](C)CC)C(=O)N[C@@H](C(C)C)C(=O)N[C@@H]([C@@H](C)CC)C(=O)N[C@@H](CC1=CC=C(O)C=C1)C(=O)N1CCC[C@H]1C(…
BGC0000578	Streptomyces	sro15-2005	1	2005.09					RiPP		1	0	0	0	8
BGC0000078	Streptomyces	incednine	1	737.462	139.77	4.9846	10	5	Polyketide		1	0	0	0	75	CN[C@H]1CC[C@H](O[C@@H]2CO[C@@H](O[C@H]3\C=C/C=C/C(/C)=C/C=C/C(/C)=C/C[C@H](C)NC(=O)\C(OC)=C\C(\C)=C\C=C\C=C\[C@@]3(C)O)[C@H](NC)[C@H]2O)O[C@@H]1C
BGC0001825	Xenorhabdus	xenematide	1	662.285	174.28	2.5831	6	6	NRP		0	0	0	0	1	C[C@H]1OC(=O)CCNC(=O)C(CC2=CNC3=C2C=CC=C3)NC(=O)C(CC2=CNC3=C2C=CC=C3)NC(=O)[C@H]1NC(=O)CC1=CC=CC=C1
BGC0001531	Tenacibaculum	bisucaberin b	1	418.243	173.5	0.4825	7	5	Other		0	0	0	0	6	NCCCCCNC(=O)CCC(=O)N(O)CCCCCN(O)C(=O)CCC(O)=O
BGC0000014	Sorangium	ambruticin	1	474.298	96.22	4.4311	5	3	Polyketide		0	0	0	0	34	CC[C@@H]1C(=CC[C@@H](O1)/C(=C/[C@H](C)/C=C/[C@H]2[C@H]([C@@H]2/C=C/[C@H]3[C@@H]([C@H](C[C@H](O3)CC(=O)O)O)O)C)/C)C
BGC0002000	Streptomyces	setomimycin	1	-1					Polyketide		1	0	0	0	15
BGC0001346	Pseudomonas	bananamide 1	3	1107.72	359.72	2.6725	13	11	NRP		0	0	0	0	8	O=C(C(CC(C)C)NC(CC(O)CCCCCCCCC)=O)NC(CC(O)=O)C(NC(C(OC(C(CC(C)C)NC1=O)=O)C)C(NC(C(C)CC)C(NC(CC(C)C)C(NC(CCC(N)=O)C(NC1CC(C)C)=O)=O)=O)=O)=O
BGC0001214	Streptomyces	marformycin a	6	856.506	233.68	0.9636	11	6	NRP		1	0	0	0	24	[H][C@@]12CCCNN1C(=O)[C@]([H])(NC(=O)[C@@H](CC1=CC=C(OC)C=C1)NC(=O)[C@@H](NC(=O)[C@@H](NC=O)C(C)C)[C@@H](C)OC(=O)[C@H](C(C)C)N(C)C(=O)[C@H](CC(C)C)NC2=O)[C@@H](C)CC
BGC0001768	[Nectria]	sansalvamide	1	586.373	142.7	2.888	6	4	NRP		2	0	0	0	5	CC(C)C[C@@H]1NC(=O)[C@@H](NC(=O)[C@H](CC(C)C)OC(=O)[C@H](CC(C)C)NC(=O)[C@H](CC2=CC=CC=C2)NC1=O)C(C)C
BGC0001013	Streptomyces	meridamycin	1	821.529	214.52	4.2749	12	7	NRP		1	0	0	0	42	CC\C1=C/C[C@H](OC(=O)C2CCCCN2C(=O)C(=O)[C@]2(O)O[C@@H](CC[C@H]2C)C[C@H](O)[C@H](C)[C@@H](O)C[C@@H](O)C[C@H](O)\C(C)=C/[C@@H](C)CC(C)[C@@H]1O)C(\C)=C\[C@@H](C)[C@@H](C)O
BGC0001057	Fusarium	zearalenone	1	318.147	83.83	3.5796	5	2	NRP		2	0	0	0	11	C[C@H]1CCCC(=O)CCC/C=C/C2=CC(=CC(=C2C(=O)O1)O)O
BGC0001546	Actinoplanes	chuangxinmycin	1	233.051	53.09	2.8303	2	2	Alkaloid		1	0	0	0	10	C[C@@H]1[C@@H](SC2=CC=CC3=C2C1=CN3)C(=O)O
BGC0001754	Ralstonia	ralsolamycin	1	-1					NRP		0	0	0	0	5
BGC0001491	Couchioplanes	67-121c	1	1290.65	448.09	0.3619	25	17	Polyketide		1	0	0	0	24	C[C@@H]1[C@H]([C@@H]([C@@H]([C@@H](O1)OC/2CC3C(C(CC(O3)(CC(CC(CC(CC(CC(CC(CC(=O)OC(C(/C=C\C=C/C=C\C=C/C=C\C=C/C=C2)C)C(C)CCC(CC(=O)C4=CC=C(C=C4)NC)O)O)O)O)O)O)O)O)O)C(=O)O)O)N)O[C@H]5[C@H]([C@H]([C@@H]([C@H](O5)CO)O)O)O
BGC0001445	Aspergillus	leporin b	1	351.183	51.46	4.6095	4	1	NRP	Siderophore,antiinsectan	2	0	0	1	11	CC(CCC1)C(C1C(/C=C/C)O2)C3=C2C(C4=CC=CC=C4)=CN(O)C3=O
BGC0001988	Aspergillus	neosartorin	1	-1					Polyketide		2	0	0	0	19
BGC0001570	Streptomyces	deimino-antipain	1	-1					NRP		1	0	0	0	9
BGC0002021	Actinoplanes	fogacin a	3	-1					Polyketide		1	0	0	0	39
BGC0001717	Penicillium	okaramine b	1	566.253	109.34	3.5341	6	3	Alkaloid		2	0	0	0	7	CO[C@@H]1[C@@]2(O)N(C(=O)\C3=C\C4=C(NC5=CC=CC=C45)C(C)(C)\C=C/N3C2=O)[C@]23[C@H](C)C(C)(C)N2C2=C(C=CC=C2)[C@]13O
BGC0001559	Chondromyces	crocagin a	2	551.238	174.53	1.255	8	5	RiPP		0	0	0	0	19	CC[C@H](C)[C@@H](C(=O)N[C@H]1[C@H](N2c3ccccc3[C@@H]4[C@H]2N(C1=O)[C@@H]([C@H]4OC(=O)N)C(=O)O)c5ccc(cc5)O)NC
BGC0001796	Brevibacillus	tauramamide	1	863.491	300.95	2.07547	9	12	NRP		1	0	0	0	22	CC(C)CCCCCC(=O)N[C@H](CC1=CC=C(O)C=C1)C(=O)N[C@@H](CO)C(=O)N[C@H](CC(C)C)C(=O)N[C@@H](CC1=CNC2=C1C=CC=C2)C(=O)N[C@@H](CCCNC(N)=N)C(O)=O
BGC0001126	Fischerella	12-epi-hapalindole j isonitrile	10	304.194	20.15	5.43289	0	1	Terpene		0	0	0	0	32	[H][C@]12CC[C@@](C)(C=C)[C@H]([N+]#[C-])[C@@]1([H])C1=CNC3=C1C(=CC=C3)C2(C)C
BGC0000738	Pasteurella	capsular polysaccharide	1	-1					Saccharide		0	0	0	0	11
BGC0000756	Avibacterium	capsular polysaccharide	1	-1					Saccharide		0	0	0	0	6
BGC0000129	Aspergillus	pyripyropene a	1	583.242	151.46	3.7553	11	1	Polyketide		2	0	0	0	9	[H][C@@]12C[C@H](OC(C)=O)[C@@]3(C)OC4=C([C@H](O)[C@]3([H])[C@@]1(C)CC[C@H](OC(C)=O)[C@@]2(C)COC(C)=O)C(=O)OC(=C4)C1=CN=CC=C1
BGC0001070	Streptomyces	kirromycin	1	796.415	224.34	2.8227	12	8	NRP	Antibacterial	1	1	0	0	59	CC[C@H](C(=O)NC/C=C/C=C(\C)/[C@H]([C@@H](C)[C@H]1[C@H]([C@H]([C@H](O1)/C=C/C=C/C=C(\C)/C(=C\2/C(=O)C=CNC2=O)/O)O)O)OC)[C@@]3([C@@H]([C@@H](C([C@@H](O3)/C=C/C=C\C)(C)C)O)O)O
BGC0001225	Streptomyces	celesticetin	1	528.214	158.02	-0.2963	11	5	NRP		1	0	0	0	24	COC(C)C(NC(=O)[C@@H]1CCCN1C)[C@H]1O[C@H](SCCOC(=O)C2=CC=CC=C2O)[C@H](O)[C@@H](O)[C@H]1O
BGC0001024	Stigmatella	myxothiazol	1	487.196	87.33	5.8184	7	1	NRP	Antifungal,Cytotoxic	0	0	1	0	7	COC(\C=C\C1=CSC(=N1)C1=CSC(=N1)C(C)\C=C\C=C\C(C)C)C(C)C(\OC)=C/C(N)=O
BGC0000532	Streptococcus	mutacin ii	1	-1					RiPP		1	0	0	0	2
BGC0001389	Pseudomonas	cichopeptin	1	-1					NRP		0	0	0	0	13
BGC0001568	Streptomyces	cytorhodin	1	912.462	215.61	4.4205	17	5	Polyketide		1	0	0	0	51	CCC1(CC(C2=C(C3=C(C(=C2C1)O)C(=O)C4=C(C3=O)C=CC=C4O)O)OC5CC(C(C(O5)C)OC6CCC(C(O6)C)OC7CCC(C(O7)C)O)N(C)C)OC8CC(C(C(O8)C)O)N(C)C
BGC0000315	Streptomyces	cda1b	7	1562.49	690.02	-5.7659	23	22	NRP	Antibacterial	1	1	0	0	40	O=C(N[C@@H](CC(O)=O)C(N[C@H](C1=CC=C(O)C=C1)C(N[C@@H](CC(O)=O)C(NCC(N[C@@H](C(N[C@@H](CCC(O)=O)C(N[C@@H](CC2=CNC3=C2C=CC=C3)C(O[C@H](C)[C@@H]4NC([C@H](CO)NC(C(O5)C5CCC)=O)=O)=O)=O)=O)[C@H](OP(O)(O)=O)C(N)=O)=O)=O)=O)=O)[C@H](CC(O)=O)NC([C@@H](CC6=CNC7=C6C=CC=C7)NC4=O)=O
BGC0001312	Pseudomonas	viscosin	1	1125.69	386.19	0.0962	15	13	NRP		0	0	0	0	16	CCCCCCCC(O)CC(=O)N[C@@H](CC(C)C)C(=O)N[C@H](CCC(O)=O)C(=O)N[C@@H]1C(C)OC(=O)[C@@H](NC(=O)[C@@H](CO)NC(=O)[C@H](CC(C)C)NC(=O)[C@@H](CO)NC(=O)[C@H](CC(C)C)NC(=O)[C@H](NC1=O)C(C)C)[C@@H](C)CC
BGC0001288	Micromonospora	maklamicin	1	524.314	104.06	5.2197	6	3	Polyketide		1	0	0	0	46	[H][C@@]12C[C@@H](C)CC[C@@]1([H])[C@]1(C)C(=O)C3=C(O)[C@@]4(C[C@@H](C[C@@H](C)O)C(CO)=C[C@@]4(C)C\C=C\[C@@H](C)[C@]1([H])C=C2)OC3=O
BGC0000781	Pseudomonas	o-antigen	1	-1					Saccharide		0	0	0	0	14
BGC0000383	Photorhabdus	luminmycin a	1	504.331	136.63	2.1707	5	5	NRP		0	0	0	0	5	CCCCCCC\C=C\C=C\C(=O)N[C@@H]([C@@H](C)O)C(=O)N[C@H]1CCCCNC(=O)\C=C\[C@H](C)NC1=O
BGC0000076	Hypomyces	hypothemycin	1	378.131	125.82	1.0269	8	3	Polyketide		2	0	0	0	9	CC1C/C=C\C(=O)C2C(O2)CC([C@H](C3=CC(=CC(=C3C(=O)O1)O)OC)O)O
BGC0001940	Pyxidicoccus	pyxidicycline a	2	-1					Polyketide		0	0	0	0	29
BGC0000333	Salinispora	cyclomarin d	1	1012.6	249.53	4.0757	11	8	NRP	Cytotoxic	1	0	0	0	23	CO[C@@H]([C@@H]1NC(=O)[C@H](C)NC(=O)[C@H](C[C@@H](C)CO)NC(=O)[C@@H](NC(=O)[C@@H](NC(=O)[C@H](CC(C)C)N(C)C(=O)[C@@H](NC1=O)C(C)C)[C@H](C)C=C(C)C)[C@H](O)C1=CN(C2=C1C=CC=C2)C(C)(C)C=C)C1=CC=CC=C1
BGC0001229	Streptomyces	sbi-06990 a1	2	-1					RiPP		1	0	0	0	4
BGC0000636	Brevibacterium	carotenoid	1	738.674	99.38	11.5564	6	4	Terpene		1	0	0	0	14	C[C@H](CCCCC(C)CCC[C@@H](C)CCCC(C)CCC=C(C)C)CCC[C@H](C)CCC[C@H](C)CCCC(C)(C)O[C@@H]1[C@@H]([C@H]([C@@H]([C@H](O1)CO)O)O)O
BGC0001893	Botrytis	abscisic acid	1	-1					Other		2	0	0	0	4
BGC0000964	Burkholderia	burkholdac a	1	533.169	133.83	1.2577	9	4	NRP	Cytotoxic	0	0	0	0	13	O=C(NC(C(C)C)C(O)CC1=O)C(CSSCC/C=C/C2O1)NC(C(NC(C2)=O)CCSC)=O
BGC0001339	Phoma	squalestatin s1	1	674.294	203.19	3.9127	10	4	Polyketide	Antifungal,Inhibitor	2	0	1	0	22	CC[C@H](C)C[C@H](C)\C=C\C(=O)O[C@@H]1C[C@]2(CCC(=C)[C@@H](OC(C)=O)[C@H](C)CC3=CC=CC=C3)O[C@@]1(C(O)=O)[C@@](O)([C@H](O2)C(O)=O)C(O)=O
BGC0000468	Streptomyces	bottromycin a2	1	822.446	200.29	3.4771	10	5	RiPP	Antibacterial	1	1	0	0	13	[H][C@@]12[C@H](C)CCN1C(=O)CN\C(=N/[C@H](C(=O)N[C@@H]([C@@H](C)C1=CC=CC=C1)C(=O)N[C@H](CC(=O)OC)C1=NC=CS1)C(C)(C)C)[C@@H](NC(=O)[C@@H](NC2=O)C(C)C)C(C)(C)C
BGC0000348	Epichloe	ergovaline	1	533.264	118.21	1.4041	6	3	NRP		2	0	0	0	6	CC(C)[C@H]1C(=O)N2CCC[C@H]2[C@]3(N1C(=O)[C@](O3)(C)NC(=O)[C@H]4CN([C@@H]5CC6=CNC7=CC=CC(=C67)C5=C4)C)O
BGC0000165	Dactylosporangium	tiacumicin b	1	1056.43	266.66	6.2344	18	7	Polyketide	Antibacterial	1	1	0	0	31	[H][C@]1(C\C=C(/C)\C=C(C)\[C@]([H])(O[C@@H]2OC(C)(C)[C@@H](OC(=O)C(C)C)[C@H](O)[C@@H]2O)[C@@H](CC)\C=C(C)\[C@@H](O)C\C=C\C=C(CO[C@@H]2O[C@H](C)[C@@H](OC(=O)C3=C(O)C(Cl)=C(O)C(Cl)=C3CC)[C@H](O)[C@@H]2OC)\C(=O)O1)[C@@H](C)O
BGC0001917	Streptomyces	5-alkyl-1,2,3,4-tetrahydroquinolines	2	-1					Polyketide		1	0	0	0	15
BGC0001112	Paraburkholderia	rhizoxin a	1	625.325	133.15	5.04542	10	1	NRP	Cytotoxic	0	0	0	0	9	C[C@@H]1/C=C/[C@@H]2[C@](O2)([C@H](C[C@H](OC(=O)[C@H]3[C@@H](O3)C[C@@H]4C[C@H]1OC(=O)C4)[C@H](C)[C@H](/C(=C/C=C/C(=C/C5=COC(=N5)C)/C)/C)OC)O)C
BGC0001769	Streptomyces	saquayamycin a	1	820.294	230.88	2.4844	16	4	Polyketide		1	0	0	0	40	C[C@@H]1O[C@H](CC[C@@H]1O[C@@H]1O[C@@H](C)C(=O)C=C1)O[C@@]1(C)CC(=O)[C@]2(O)C3=C(C=C[C@]2(O)C1)C(=O)C1=C(O)C(=CC=C1C3=O)[C@H]1C[C@@H](O)[C@H](O[C@@H]2O[C@@H](C)C(=O)C=C2)[C@@H](C)O1
BGC0000205	Candidatus	bryostatin	1	808.425	213.81	3.8719	15	4	Polyketide		0	0	0	0	6	CCC(C)C(=O)OC1CC2CC(CC(=O)OC(CC3C/C(=C\C(=O)OC)/CC(O3)(C(/C=C/C4C/C(=C/C(=O)OC)/CC(O4)CC(C1(C)C)(O2)O)(C)C)O)C(C)O)O
BGC0001732	Streptomyces	paulomycin	1	658.168	260.03	-1.9374	17	5	Other		1	0	0	0	53	C/C=C(/C(=O)O[C@@H]1[C@H](OC([C@@H]([C@@H]1O[C@@H]2C[C@H]([C@H]([C@H](O2)C)O)OC)O)C3(CC(=O)C(=C(C3=O)C(=O)O)N)O)COC(=O)C)\N=C=S
BGC0001472	Streptomyces	berninamycin a	1	1145.34	449.32	0.09834	21	12	RiPP		1	0	0	0	15	C/C=C\1/C2=NC(=C(O2)C)C(=O)NC(=C)C(=O)N[C@H](C(=O)NC(=C)C3=NC(=C(O3)C)C(=O)NC(=C)C(=O)NC(=C)C4=NC(=CO4)C5=C(C=CC(=N5)C(=O)NC(=C)C(=O)NC(=C)C(=O)N)C6=NC(=CS6)C(=O)N[C@H](C(=O)N1)[C@@H](C)O)C(C)(C)O
BGC0000021	Nocardiopsis	apoptolidin	1	1128.64	289.67	3.5873	21	8	Polyketide		1	0	0	0	39	COC[C@@H](C[C@H]1O[C@@](O)([C@H](O)[C@@H]2C[C@H](OC)[C@@H](O)CC\C=C(/C)\C=C\[C@@H](O[C@@H]3O[C@@H](C)[C@H](OC)[C@@H](O)[C@@H]3O)[C@H](C)\C=C(/C)\C=C(/C)\C=C(C)\C(=O)O2)[C@H](C)[C@@H](O)[C@H]1C)O[C@H]1C[C@](C)(O)[C@@H](O[C@H]2C[C@@H](OC)[C@H](O)[C@@H](C)O2)[C@H](C)O1
BGC0001090	Bacillus	bacillomycin d	1	1044.55	408.18	-2.1214	14	13	NRP	Antifungal	1	0	1	0	10	CCC(C)CCCCCCCCC1CC(=O)NC(CC(N)=O)C(=O)NC(CC2=CC=C(O)C=C2)C(=O)NC(CC(N)=O)C(=O)N2CCCC2C(=O)NC(CCC(O)=O)C(=O)NC(CO)C(=O)NC(C(C)O)C(=O)N1
BGC0001407	Bacillus	bicereucin	1	-1					RiPP		1	0	0	0	11
BGC0001948	Streptomyces	naseseazine c	2	-1					Other		1	0	0	0	3
BGC0000246	Streptomyces	mithramycin	1	1084.47	358.2	-0.24928	24	11	Polyketide		1	0	0	0	18	C[C@@H]1[C@H]([C@@H](C[C@@H](O1)O[C@@H]2C[C@@H](O[C@@H]([C@H]2O)C)OC3=CC4=CC5=C(C(=O)[C@H]([C@@H](C5)[C@@H](C(=O)[C@H]([C@@H](C)O)O)OC)O[C@H]6C[C@H]([C@@H]([C@H](O6)C)O)O[C@H]7C[C@H]([C@H]([C@H](O7)C)O)O[C@H]8C[C@]([C@@H]([C@H](O8)C)O)(C)O)C(=C4C(=C3C)O)O)O)O
BGC0000597	Streptomyces	swa-2138	1	2138.18					RiPP		1	0	0	0	9
BGC0001275	Glarea	6-methylsalicyclic acid	1	152.047	57.53	1.39882	2	2	Polyketide		2	0	0	0	1	CC1=C(C(=CC=C1)O)C(=O)O
BGC0000471	Oscillatoria	viridisamide a	1	-1					RiPP		0	0	0	0	8
BGC0000843	Streptomyces	alanylclavam	4	200.08	92.86	-1.2544	4	2	Other	Antifungal	1	0	1	0	16	C1[C@H]2N(C1=O)C[C@@H](O2)C[C@@H](C(=O)O)N
BGC0000777	Escherichia	lipopolysaccharide	1	4897.15	1888.75	-9.9821	107	62	Saccharide		0	0	0	0	9	CCCCCCCCCCCCCCCC1[C@H](OC([C@H]([C@@H]1OC(=O)CC(CCCCCCCCCCC)O)O)CO[C@H]2[C@H](C([C@@H](C(O2)CO[C@@]3(CC([C@H](C(O3)C(CO)O)O[C@H]4[C@@H](C([C@@H](C(O4)C(CO)O)OP(=O)(O)OP(=O)(O)OCCN)O[C@@H]5[C@@H](C([C@@H](C(O5)C(CO[C@@H]6[C@@H](C([C@](CO6)(C(CO)O)O)O)O)O)OP(=O)(O)O)O[C@@H]7C(C([C@@H](C(O7)CO[C@@H]8C(C([C@H](C(O8)CO)O)O)O)O)O[C@@H]9C(C([C@H](C(O9)CO)O)O)O[C@@H]1C(C([C@@H](C(O1)CO)O[C@@H]1C(C([C@H](…
BGC0001543	Hahella	chejuenolide a	2	387.241	86.63	3.1632	4	3	Polyketide		0	0	0	0	26	C[C@@H]1[C@@H](NC(C)=O)\C=C(/C)\C=C\[C@H](O)C\C=C(/C)\C=C\[C@@H](O)C\C=C(C)\C1=O
BGC0001912	Streptomyces	(2s,6r)-diamino-(5r,7)-dihydroxy-heptanoic acid	1	-1					NRP		1	0	0	0	33
BGC0001059	Bacillus	zwittermicin a	1	396.197	280.5	-6.8946	10	11	NRP		1	0	0	0	27	NC(CO)C(O)CC(O)[C@@H](N)[C@@H](O)[C@H](O)C(=O)NC(CNC(N)=O)C(N)=O
BGC0001569	Streptomyces	dechlorocuracomycin	1	755.433	279.73	-1.0339	9	10	NRP		1	0	0	0	24	CC[C@H](C)[C@@H]3NC(=O)[C@@H](CC(C)C)NC(=O)[C@@H](C(C)C)NC(=O)[C@H](Cc1c[nH]c2ccccc12)NC(=O)C(C(O)C(N)=O)NC(=O)[C@H](CCCN)NC3=O
BGC0000038	Streptomyces	coelimycin p1	1	348.114	84.5	1.5713	6	2	Polyketide		1	0	0	0	24	C/C=C/C(=O)/C/1=C/C(=C\2/C=CCCN2)/SC[CH](C(=O)O1)NC(=O)C
BGC0000035	Streptomyces	chalcomycin a	1	700.367	181.2	1.4584	14	3	Polyketide		1	0	0	0	41	CO[C@@H]1C[C@H](C)O[C@H](OC2C(C)CC(C)(O)C(=O)\C=C\C3OC3C(CO[C@@H]3O[C@H](C)[C@@H](O)[C@@H](OC)[C@H]3OC)C(C)OC(=O)\C=C\C2C)[C@H]1O
BGC0001184	Bacillus	bacilysin	1	270.122	125.01	-1.1327	7	2	Other	Antibacterial	1	1	0	0	7	C[C@@H](C(=O)OC(=O)[C@H](CC1CCC(=O)[C@H]2[C@@H]1O2)N)N
BGC0001192	Paenibacillus	colistin a	2	1168.77	490.66	-5.4414	18	18	NRP		1	0	0	0	5	CC[C@@H](C)CCCCC(=O)N[C@@H](CCN)C(=O)N[C@@H]([C@@H](C)O)C(=O)N[C@@H](CCN)C(=O)N[C@H]1CCNC(=O)[C@@H](NC(=O)[C@@H](NC(=O)[C@@H](NC(=O)[C@@H](NC(=O)[C@H](NC(=O)[C@@H](NC1=O)CCN)CC(C)C)CC(C)C)CCN)CCN)[C@@H](C)O
BGC0000158	Streptomyces	tautomycetin	1	606.34	164.5	3.9463	10	3	Polyketide	Inhibitor	1	0	0	0	21	CC/C(=C\C(=O)C[C@H](C)C[C@@H](C)CC[C@@H]([C@H](C)C(=O)C[C@H]([C@H](C)[C@@H](C)OC(=O)C[C@H](C1=C(C(=O)OC1=O)C)O)O)O)/C=C
BGC0001500	Actinoallomurus	allocyclinone	1	-1					Polyketide		1	0	0	0	37
BGC0000449	Paenibacillus	tridecaptin	1	-1					NRP		1	0	0	0	5
BGC0000450	Streptomyces	triostin a	1	1086.41	301.8	0.5944	18	4	NRP		1	0	0	0	18	CC(C)C1N(C)C(=O)C2CSSCC(N(C)C(=O)C(C)NC(=O)C(COC1=O)NC(=O)C1=CN=C3C=CC=CC3=N1)C(=O)N(C)C(C(C)C)C(=O)OCC(NC(=O)C1=CN=C3C=CC=CC3=N1)C(=O)NC(C)C(=O)N2C
BGC0000902	Saccharopolyspora	flaviolin	1	206.022	94.83	0.7621	5	3	Other		1	0	0	0	4	C1=C(C=C2C(=C1O)C(=CC(=O)C2=O)O)O
BGC0001696	Streptomyces	neothioviridamide	1	-1					RiPP		1	0	0	0	11
BGC0001375	Penicillium	penitrem a	6	633.286	107.47	5.6617	6	4	Terpene		2	0	0	0	5	CC(=C)[C@@H]1[C@@H]([C@@H]2[C@@]3(O2)[C@@H](O1)CC[C@]4([C@]3(CC[C@@H]5[C@@]4(C6=C7[C@H]5OC([C@H]8C[C@H]9[C@@]8(C1=C7C(=CC(=C1CC9=C)Cl)N6)O)(C)C)C)O)C)O
BGC0000552	Streptococcus	smba	2	-1					RiPP		1	0	0	0	7
BGC0000859	Methylomicrobium	ectoine	1	142.074	61.69	-0.1487	3	2	Other		0	0	0	0	4	CC1=NCC[C@H](N1)C(=O)O
BGC0001684	Klebsiella	n-acyloxyacyl glutamine	1	-1					Other		0	0	0	0	4
BGC0000239	Streptomyces	landomycin a	1	1086.47	306.74	2.85492	22	8	Polyketide	Antibacterial,Cytotoxic	1	1	0	0	32	C[C@@H]1O[C@H](CC[C@@H]1O)O[C@@H]1C[C@H](O[C@@H]2[C@@H](C)O[C@H](C[C@H]2O)O[C@H]2CC[C@H](O[C@@H]3C[C@H](O[C@@H]4[C@@H](C)O[C@H](C[C@H]4O)OC4=CC=C(O)C5=C4C(=O)C4=C(C5=O)C5=C(O)C=C(C)C=C5C[C@H]4O)O[C@H](C)[C@H]3O)O[C@H]2C)O[C@H](C)[C@H]1O
BGC0000554	Streptomyces	sro15-3108	1	3108.3					RiPP		1	0	0	0	4
BGC0000556	Streptococcus	streptin	1	-1					RiPP		1	0	0	0	10
BGC0000916	Staphylococcus	molybdenum cofactor	1	520.877	211.62	-2.8064	14	4	Other		1	0	0	0	17	C(C1C(=C(C2C(O1)NC3=C(N2)C(=O)N=C(N3)N)[S-])[S-])OP(=O)([O-])[O-].O=[Mo+2]=O
BGC0000735	Pasteurella	capsular polysaccharide	1	-1					Saccharide		0	0	0	0	15
BGC0001066	Streptomyces	kendomycin	1	486.298	96.22	5.1295	6	3	Polyketide	Antibacterial,Cytotoxic	1	1	0	0	20	[H][C@]12CC[C@H](C)\C=C(C)\C[C@@H](C)C[C@H](C)[C@]3(O)OC4=C(C)C(=O)C(O)=C(C4=C3)[C@]([H])(O1)[C@H](C)[C@@H](O)[C@H]2C
BGC0001009	Melittangium	melithiazol a	1	422.133	70.01	4.2732	8	0	NRP		0	0	0	0	19	COC(\C=C\C1=CSC(=N1)C1CSC(=N1)C(C)=C)C(C)C(\OC)=C/C(=O)OC
BGC0001025	Myxococcus	myxovirescin a1	1	623.44	142.39	5.1984	8	4	NRP		0	0	0	0	23	CCC[C@@H]1OC(=O)[C@@H](C)C[C@H](C)CCCCC(=O)CCCC(CC)\C=C\C=C(COC)\CC[C@@H](O)[C@@H](O)C[C@H](O)CNC1=O
BGC0000191	Streptomyces	aclacinomycin	1	811.342	217.05	3.1577	16	4	Polyketide		1	0	0	0	25	CC[C@]1(C[C@@H](C2=C([C@H]1C(=O)OC)C=C3C(=C2O)C(=O)C4=C(C3=O)C=CC=C4O)OC5CC(C(C(O5)C)OC6CC(C(C(O6)C)OC7CCC(=O)C(O7)C)O)N(C)C)O
BGC0000743	Streptococcus	capsular polysaccharide	1	1322.45	660.55	-16.7828	38	25	Saccharide		1	0	0	0	5	CC(=O)N[C@@H]1[C@H](C[C@@](O[C@H]1[C@@H]([C@@H](CO)O)O)(C(=O)O)O[C@H]2[C@H]([C@H](O[C@H]([C@@H]2O)O[C@@H]3[C@H](O[C@@H]([C@@H]([C@H]3O)NC(=O)C)OC[C@@H]4[C@H]([C@@H]([C@H]([C@H](O4)O[C@H]5[C@H](O[C@H]([C@@H]([C@H]5O[C@H]6[C@@H]([C@H]([C@@H]([C@H](O6)CO)O)O)O)O)O[C@@H]7[C@H](O[C@H]([C@@H]([C@H]7O)O)O)CO)CO)O)O)O)CO)CO)O)O
BGC0000209	Kitasatospora	chlortetracycline	1	478.114	181.62	0.2824	9	6	Polyketide		1	0	0	0	35	C[C@@]1(C2C[C@H]3[C@@H](C(=O)C(=C([C@]3(C(=O)C2=C(C4=C(C=CC(=C41)Cl)O)O)O)O)C(=O)N)N(C)C)O
BGC0000182	Pseudomonas	pseudomonic acid a	1	500.299	146.05	2.5925	8	4	Polyketide	Antibacterial	0	1	0	0	36	C[C@H](O)[C@H](C)[C@@H]1O[C@H]1C[C@H]1CO[C@@H](C\C(C)=C\C(=O)OCCCCCCCCC(O)=O)[C@H](O)[C@@H]1O
BGC0000164	Streptomyces	tetronomycin	1	608.333	114.35	1.5641	8	1	Polyketide		1	0	0	0	33	C[C@H]1CCC[C@H]([C@@H]1[C@@H](C)C(=O)C2=C(C(=C)OC2=O)[O-])/C=C(\CO)/[C@@H]3[C@H](CC[C@@H](O3)/C=C/C[C@@H]4CC[C@H](O4)[C@@H](C)OC)C.[Na+]
BGC0001698	Xenorhabdus	nevaltophin a	4	-1					NRP		0	0	0	0	3
BGC0000216	Dactylosporangium	dactylocycline a	1	697.225	250.8	0.4742	15	8	Polyketide		1	0	0	0	38	[H][C@]12C[C@@]3(O)[C@H](N(C)C)C(O)=C(C(N)=O)C(=O)[C@@]3(O)C(O)=C1C(=O)C1=C(C(Cl)=C(OC)C=C1O)[C@]2(C)O[C@H]1C[C@](C)(NO)[C@@H](OC)[C@H](C)O1
BGC0000613	Nonomuraea	thiomuracin a	1	1338.21	398.21	6.55872	24	10	RiPP		1	0	0	0	12	C[C@@H](C1CO1)[C@@H]1NC(=O)[C@H](CC2=CC=C(O)C=C2)NC(=O)C2=CSC(=N2)[C@@H](NC(=O)C2=C(C)SC(=N2)[C@H](CC(N)=O)NC(=O)C2=CSC(=N2)C2=C(N=C(C=C2)C2=NC(=CS2)C(=O)NC(=C)C(=O)NC(=C)C(O)=O)C2=CSC(=N2)C2=CSC1=N2)[C@H](O)C1=CC=CC=C1
BGC0001715	Bacillus	octapeptin c4	1	-1					NRP		1	0	0	0	17
BGC0001462	Amycolatopsis	avoparcin	1	1745.56	631.26	-0.3541	33	23	NRP	Antibacterial	1	1	0	0	37	C[C@H]1[C@@H]([C@@H](C[C@@H](O1)O[C@H]2[C@H]3C(=O)N[C@@H](C4=CC(=CC(=C4C5=C(C=CC(=C5)[C@H](C(=O)N3)NC(=O)[C@H]6C7=CC(=C(C(=C7)OC8=C(C=C2C=C8)Cl)O[C@H]9C([C@H]([C@@H]([C@H](O9)CO)O)O)O[C@H]1C[C@H]([C@H]([C@@H](O1)C)O)N)OC1=CC=C(C=C1)[C@H]([C@H](C(=O)N[C@H](C(=O)N6)C1=CC=C(C=C1)O)NC(=O)[C@@H](C1=CC=C(C=C1)O[C@H]1[C@@H]([C@@H]([C@H]([C@@H](O1)C)O)O)O)NC)O)O)O)O)C(=O)O)N)O
BGC0000595	Streptomyces	sco-2138	1	2138.19					RiPP		1	0	0	0	14
BGC0001738	Pyrenochaetopsis	phomasetin	1	413.257	77.84	3.9676	4	2	NRP		2	0	0	0	7	[H][C@]12C[C@@H](C)CC[C@]1([H])[C@](C)([C@@H](\C=C\C=C\C)C(C)=C2)C(\O)=C1\C(=O)[C@@H](CO)N(C)C1=O
BGC0001658	Amycolatopsis	macrotermycins	1	-1					Polyketide		1	0	0	0	26
BGC0000042	Streptomyces	cremimycin	1	631.372	151.62	4.6915	9	4	Polyketide		1	0	0	0	40	CCCCCCC1CC(=O)CCCC(O)C\C(O)=C2/C(CC(O[C@H]3C[C@H](OC)[C@H](O)[C@@H](C)O3)C2=O)\C=C(/C)\C=C/C=C\C(=O)N1
BGC0000576	Rubrivivax	rubrivinodin	1	-1					RiPP		0	0	0	0	5
BGC0000818	Aspergillus	notoamide a	1	463.211	99.18	2.524	5	2	NRP	Cytotoxic	2	0	0	0	18	CC1(C)[C@@H]2C[C@]34CCCN3C(=O)[C@@]2(C[C@@]11C(=O)N(O)C2=C1C=CC1=C2C=CC(C)(C)O1)NC4=O
BGC0001166	Alternaria	hc-toxin	1	436.232	137.21	-0.5964	6	3	NRP	Inhibitor	2	0	0	0	1	C[C@@H]1C(=O)N[C@H](C(=O)N2CCC[C@@H]2C(=O)N[C@H](C(=O)N1)C)CCCCCC(=O)C3CO3
BGC0001702	Saccharothrix	nocamycin	1	503.216	140.76	1.6918	9	2	NRP		1	0	0	0	27	CC1C2C(=O)CC3(C(O3)C(C)C(=O)OC)C(O2)(OC1C(C)/C=C(\C)/C=C/C(=C4C(=O)CNC4=O)O)C
BGC0000120	Penicillium	patulin	1	154.027	55.76	-0.2979	4	1	Polyketide	Cytotoxic	2	0	0	0	15	C1C=C2C(=CC(=O)O2)C(O1)O
BGC0001371	Aspergillus	echinocandin b	1	1059.57	368.19	-1.3304	16	14	NRP		2	0	0	0	13	CCCCC/C=C\C/C=C\CCCCCCCC(=O)N[C@H]1C[C@H]([C@H](NC(=O)[C@@H]2[C@H]([C@H](CN2C(=O)[C@@H](NC(=O)[C@@H](NC(=O)[C@@H]3C[C@H](CN3C(=O)[C@@H](NC1=O)[C@@H](C)O)O)[C@@H]([C@H](C4=CC=C(C=C4)O)O)O)[C@@H](C)O)C)O)O)O
BGC0000841	Streptomyces	alanylclavam	5	200.08	92.86	-1.2544	4	2	Other	Antifungal	1	0	1	0	6	C1[C@H]2N(C1=O)C[C@@H](O2)C[C@@H](C(=O)O)N
BGC0001554	Methanosarcina	coenzyme f430	1	905.287	326.94	3.1121	11	7	Other		3	0	0	0	5	C[C@@]12CC(=O)N[C@@]13C[C@H]4[C@H]([C@](C(=N4)C[C@@H]5[C@H]([C@@H]6CCC(=O)/C(=C/7\[C@H]([C@@H](/C(=C/C(=N3)[C@H]2CCC(=O)O)/[N-]7)CC(=O)O)CCC(=O)O)/C6=N5)CC(=O)O)(C)CC(=O)N)CCC(=O)O.[Ni]
BGC0001787	Streptococcus	suicin 3908	1	-1					RiPP		1	0	0	0	9
BGC0001105	symbiont	onnamide a	1	793.447	255.74	1.5278	12	7	NRP	Cytotoxic	3	0	0	0	10	C[C@H]1[C@H](O[C@](CC1=C)([C@@H](C(=O)N[C@@H]2[C@@H]3[C@@H]([C@H](C([C@H](O3)C[C@@H](CCC/C=C/C=C/C=C/C(=O)N[C@@H](CCCN=C(N)N)C(=O)O)O)(C)C)OC)OCO2)O)OC)C
BGC0000800	Xanthomonas	xanthan	1	1747.85	534.6	5.0585	33	15	Saccharide		0	0	0	0	13	C/C=C(/C)\CC/C=C(/C)\CC/C=C(/C)\CC/C=C(/C)\CC/C=C(/C)\CC/C=C(/C)\CC/C=C(/C)\CC/C=C(/C)\CC/C=C(\C)/CC/C=C(\C)/CC/C=C(\C)/COP(=O)([O-])OP(=O)([O-])O[C@@H]1[C@@H]([C@H]([C@@H]([C@H](O1)CO)O[C@H]2[C@@H]([C@H]([C@@H]([C@H](O2)CO)O)O[C@@H]3[C@H]([C@H]([C@@H]([C@H](O3)CO)O)O)O[C@H]4[C@@H]([C@H]([C@@H]([C@H](O4)C(=O)[O-])O[C@H]5[C@H]([C@H]([C@@H]([C@H](O5)CO)O)O)O)O)O)O)O)O
BGC0000908	Streptomyces	melanin	1	318.064	99.86	1.32664	4	2	Other		1	0	0	0	7	CC1=C2C3=C(C4=CNC5=C(C(=O)C(=O)C(=C45)C3=CN2)C)C(=O)C1=O
BGC0001599	Burkholderia	fragin	1	273.205	82	2.8603	4	2	NRP		0	0	0	0	8	CCCCCCCC(=O)NCC(C(C)C)N(N=O)O
BGC0001824	Xenorhabdus	xefoampeptides a-g	1	-1					NRP		0	0	0	0	6
BGC0000283	Actinomyces	cetoniacytone a	1	213.064	99.16	-1.9201	5	3	Other	Cytotoxic	1	0	0	0	31	CC(=O)NC1=CC(=O)[C@]2(CO)O[C@@H]2[C@H]1O
BGC0000658	Streptomyces	2-methylisoborneol	1	168.151	20.23	2.5836	1	1	Terpene		1	0	0	0	2	CC1(C2CCC1(C(C2)(C)O)C)C
BGC0001770	Streptomyces	sceliphrolactam	1	481.246	127.09	3.0758	6	5	Polyketide		1	0	0	0	25	CC1CNC(=O)\C=C(/O)\C=C\C(\C)=C\C=C\C(O)C(O)C(O)C(=O)\C=C/C=C/C(/C)=C/C=C/C=C/1
BGC0000509	Staphylococcus	epilancin 15x	1	3172.7	1177.23	-7.97323	43	42	RiPP	Antibacterial	1	1	0	0	11	CC[C@H](C)[C@H](NC(=O)C(\NC(=O)C(\NC(=O)[C@H](CCCCN)NC(=O)[C@@H](NC(=O)[C@@H](NC(=O)C(=C)NC(=O)[C@H](C)NC(=O)C(C)O)[C@@H](C)CC)C(C)C)=C/C)=C/C)C(=O)NC(CCCCN)C(=O)N[C@@H](C)C(=O)N[C@H]1CSC[C@H](NC(=O)[C@H](CC(C)C)NC(=O)C(CCCCN)NC(=O)C(CCCCN)NC1=O)C(=O)N[C@@H](CCCNC(N)=N)C(=O)NCC(=O)N[C@@H](CC1=CC=CC=C1)C(=O)N[C@H]1C(C)SC[C@@H]2NC(=O)[C@@H](NC(=O)[C@H](CC(C)C)NC1=O)C(C)SC[C@H](NC(=O)CNC2=O)C(=O)N[C…
BGC0001602	Lactobacillus	gassericin-t	1	-1					RiPP		1	0	0	0	9
BGC0000878	Streptomyces	puromycin	1	471.223	160.88	-0.7937	11	4	Other		1	0	0	0	8	[H][C@](N)(CC1=CC=C(OC)C=C1)C(=O)N[C@@H]1[C@@H](CO)O[C@H]([C@@H]1O)N1C=NC2=C1N=CN=C2N(C)C
BGC0000214	Streptomyces	cosmomycin b	1	771.347	214.14	2.941	15	6	Polyketide		1	0	0	0	14	CC[C@@]1(O)CCC2=C(O)C3=C(C(O)=C2[C@H]1O[C@H]1C[C@@H]([C@H](O[C@H]2C[C@H](O)[C@H](O[C@H]4CC[C@H](O)[C@H](C)O4)[C@H](C)O2)[C@H](C)O1)N(C)C)C(=O)C1=C(C(O)=CC=C1)C3=O
BGC0000732	Raoultella	capsular polysaccharide	1	-1					Saccharide		0	0	0	0	17
BGC0000585	Escherichia	microcin c7	1	1177.46	586.29	-9.9407	24	17	RiPP		0	0	0	0	7	C[C@H]([C@@H](C(=O)NCC(=O)N[C@@H](CC(=O)N)C(=O)N[C@@H](C)C(=O)N[C@@H](CC(=O)O)C(=O)N[P+]([O-])(OCCC[NH3+])OC[C@@H]1[C@H]([C@H]([C@@H](O1)N2C=NC3=C2N=CN=C3N)O)O)NC(=O)[C@H](CCCN=C(N)N)NC(=O)[C@H](CCSC)NC=O)O
BGC0000991	Sorangium	epothilone	1	507.265	109.25	4.47752	8	2	NRP		0	0	0	0	10	C[C@H]1CCC[C@@]2([C@@H](O2)C[C@H](OC(=O)C[C@@H](C(C(=O)[C@@H]([C@H]1O)C)(C)C)O)/C(=C/C3=CSC(=N3)C)/C)C
BGC0000028	Streptomyces	bafilomycin b1	1	815.446	207.38	5.0485	13	5	Polyketide	Antibacterial,Antifungal,antineoplastic, immunosuppressive	1	1	1	0	18	COC1\C=C\C=C(C)\CC(C)C(O)C(C)\C=C(/C)\C=C(OC)\C(=O)OC1C(C)C(O)C(C)C1(O)CC(OC(=O)\C=C\C(=O)NC2=C(O)CCC2=O)C(C)C(O1)C(C)C
BGC0000907	Streptomyces	lincomycin	1	406.214	122.49	-0.857	8	5	Other		1	0	0	0	33	CCC[C@@H]1C[C@@H](C(N[C@H]([C@H](O)C)[C@@H]2[C@H](O)[C@H](O)[C@@H](O)[C@@H](SC)O2)=O)N(C)C1
BGC0001283	Streptomyces	arsono-polyketide	1	331.125					Polyketide		1	0	0	0	24
BGC0000789	Escherichia	o-antigen	1	-1					Saccharide		0	0	0	0	9
BGC0001664	Scytonema	merosterol	1	-1					Terpene		0	0	0	0	19
BGC0000007	Aspergillus	aflatoxin	1	328.058	84.2	1.8605	7	0	Polyketide		2	0	0	0	25	COC1=C2C3=C(C(=O)OCC3)C(=O)OC2=C4C5C=COC5OC4=C1
BGC0001605	Sinorhizobium	gibberellin	1	346.142	104.06	1.0271	5	3	Terpene		0	0	0	0	8	CC12[C@H](C=C[C@@]3([C@@H]1[C@@H]([C@]45[C@H]3CC[C@](C4)(C(=C)C5)O)C(=O)O)OC2=O)O
BGC0001789	Streptococcus	suicin 90-1330	1	-1					RiPP		1	0	0	0	11
BGC0001204	Streptomyces	versipelostatin	1	1098.65	246.43	7.2794	17	6	Polyketide		1	0	0	0	35	[H][C@@]1(C[C@H](O)[C@]([H])(O[C@]2([H])C[C@@H](OC)[C@]([H])(O[C@@]3([H])C[C@H](O)[C@H](O)[C@@H](C)O3)[C@@H](C)O2)[C@@H](C)O1)O[C@H]1C(C)CCCC2(C)C=C(C)C(C)CC22OC(=O)C(=C2O)C(=O)C2(CC)C3C(C)C(=O)CC(O)C3C=C(C)C2\C(CC)=C\C(CO)CC1C
BGC0001709	Streptomyces	nystatin	1	925.503	319.61	0.9357	17	12	Polyketide		1	0	0	0	19	C[C@H]1/C=C/C=C/CC/C=C/C=C/C=C/C=C/C(CC2C(C(C[C@](O2)(CC(C(CCC(CC(CC(CC(=O)O[C@H]([C@@H]([C@@H]1O)C)C)O)O)O)O)O)O)O)C(=O)O)O[C@@H]3[C@H]([C@H]([C@@H]([C@H](O3)C)O)N)O
BGC0000555	Staphylococcus	staphylococcin c55 α	2	-1					RiPP		1	0	0	0	10
BGC0000699	Streptomyces	hygromycin a	1	511.169	204.47	-2.4674	12	7	Saccharide		1	0	0	0	33	CC(=O)[C@H]1O[C@@H](OC2=C(O)C=C(\C=C(/C)C(=O)N[C@@H]3[C@H](O)[C@H]4OCO[C@H]4[C@@H](O)[C@@H]3O)C=C2)[C@@H](O)[C@@H]1O
BGC0001321	Solanum	monoterpenes-diterpenes	1	-1					Terpene		3	0	0	0	21
BGC0000852	Sporosarcina	ectoine	1	142.074	61.69	-0.1487	3	2	Other		1	0	0	0	3	CC1=NCC[C@H](N1)C(=O)O
BGC0001766	Streptomyces	salinamide a	1	1019.49	309.73	-0.3565	15	8	NRP		1	0	0	0	14	[H][C@]1(NC(=O)[C@@H](CC2=CC=CC=C2)N(C)C(=O)[C@@H]2NC(=O)[C@@H](NC(=O)[C@H](NC(=O)[C@@H](C)[C@@H](O)C(C)C)[C@H](C)OC(=O)[C@@H](COC(=O)CNC(=O)\C=C\[C@@]3(CO3)[C@H](C)OC3=CC=C2C=C3)NC1=O)[C@H](C)CC)[C@H](C)O
BGC0001955	Amycolatopsis	keratinimicin a	4	-1					Other		1	0	0	0	42
BGC0000081	Streptoalloteichus	kedarcidin	1	1029.37	238.82	3.5111	18	5	Polyketide	Antibacterial,Cytotoxic	1	1	0	0	115	CC1C(C(CC(O1)OC\2COC(=O)C(CC3=NC(=C(C=C3)OC4C=C5C#C/C2=C\C#CC6C5(C4OC7CC(C(C(O7)C)O)(C)O)O6)Cl)NC(=O)C8=C(C=C9C=C(C(=C(C9=C8)OC)OC)OC(C)C)O)O)N(C)C
BGC0000712	Streptomyces	paromomycin	1	615.296	347.32	-8.8617	19	13	Saccharide		1	0	0	0	40	NC[C@H]1O[C@H](O[C@@H]2[C@@H](CO)O[C@@H](O[C@@H]3[C@@H](O)[C@H](N)C[C@H](N)[C@H]3O[C@H]3O[C@H](CO)[C@@H](O)[C@H](O)[C@H]3N)[C@@H]2O)[C@H](N)[C@@H](O)[C@@H]1O
BGC0000133	Amycolatopsis	quartromicin a1	1	1506.65	499.94	-1.8175	30	16	Polyketide		1	0	0	0	36	CC1=CC=CC2(C)C=C(COC3OC(CO)C(O)C(O)C3O)C(C)CC23OC(O)C(C3=O)C(O)C=CC2(C)C=C(C=O)C(C)CC23OC(O)C(C3=O)C(O)C(C)=CC=CC2C=C(COC3OC(CO)C(O)C(O)C3O)C(C)CC23OC(O)C(C3=O)C(O)C=CC2(C)C=C(C=O)C(C)CC23OC(O)C(C3=O)C1O
BGC0001894	Lactobacillus	heteropolysaccharide (heps)	1	-1					Saccharide		1	0	0	0	33
BGC0001593	Streptomyces	ficellomycin	1	312.191	159.83	-2.3624	5	5	NRP		1	0	0	0	55	CC(C)C(C(=O)NC(C1CC(C2N1C2)N=C(N)N)C(=O)O)N
BGC0001381	Nocardia	brasilinolide a	3	1166.64	399.18	1.1829	23	13	Polyketide		1	0	0	0	102	[H][C@]12C[C@H](O)[C@@H](O)[C@](O)(CC(O)C(C)CCC(O)CC(O)CC(O)C\C=C\C(=O)OC(C(C)C(O)C(C)C(O)C(C)C(C)O[C@@H]3C[C@@H](OC(=O)CCCC)[C@@H](O)[C@@H](C)O3)C(C)C3OC3C(O)CCCC(CC(O)C1)OC(=O)CC(O)=O)O2
BGC0001123	Aspergillus	aspirochlorine	1	359.964	88.1	1.4163	7	2	NRP	Antifungal,Cytotoxic	2	0	1	0	22	[H][C@@]12SS[C@]3([H])NC(=O)[C@@]1(OC1=C2C=C(Cl)C(O)=C1)N(OC)C3=O
BGC0001591	uncultured	fatty acid enol ester	1	-1					Other		3	0	0	0	30
BGC0000858	Methylobacter	ectoine	1	142.074	61.69	-0.1487	3	2	Other		0	0	0	0	4	CC1=NCC[C@H](N1)C(=O)O
BGC0000350	uncultured	et-743	1	761.262	168.72	3.41324	15	4	NRP	Cytotoxic	3	0	0	0	25	CC1=C(C(=C2[C@@H]3[C@@H]4[C@H]5C6=C([C@@H](N4[C@H]([C@@H](N3C)CC2=C1)O)COC(=O)[C@@]7(CS5)C8=CC(=C(C=C8CCN7)O)OC)C9=C(C(=C6OC(=O)C)C)OCO9)O)OC
BGC0000372	Aspergillus	hexadehydroastechrome	3	1106.39	207.42	9.34136	15	3	NRP	Cytotoxic	2	0	0	1	8	C=C(/C=C/C1=CC=CC2=C1NC=C2CC(N3O[Fe](ON4C(CC5=CNC6=C5C=CC=C6/C=C/C(C)=C)=C(N=C(C4=O)C)OC)ON7C(CC8=CNC9=C8C=CC=C9/C=C/C(C)=C)=C(N=C(C7=O)C)OC)=C(N=C(C3=O)C)OC)C
BGC0000965	Streptomyces	c-1027	1	843.241	217.8	2.8038	15	5	Polyketide	Antibacterial,Cytotoxic	1	1	0	0	66	COC1=CC2=C(NC(=O)C(=C)O2)C(=C1)C(=O)OC1COC(=O)CC(N)C2=CC(O)=C(OC3C#CC=C1C#CC1=CC=C[C@]31O[C@@H]1OC(C)(C)[C@H](C(O)C1O)N(C)C)C(Cl)=C2
BGC0001464	Pseudoalteromonas	tetrabromopyrrole	1	378.684	15.79	4.0647	0	1	Other		0	0	0	0	6	C1(=C(NC(=C1Br)Br)Br)Br
BGC0001238	Aspergillus	biotin	1	244.088	78.43	0.7968	3	3	Other		2	0	0	0	3	OC(=O)CCCC[C@@H]1SC[C@@H]2NC(=O)N[C@H]12
BGC0001298	Streptomyces	4-z-annimycin	1	-1					Polyketide		1	0	0	0	9
BGC0001952	Anabaena	minutissamide a	3	-1					NRP		0	0	0	0	13
BGC0002034	Streptomyces	perquinoline a	3	-1					Other		1	0	0	0	14
BGC0000267	Micromonospora	saquayamycin z	1	1430.65	383.1	4.3079	29	8	Polyketide	Cytotoxic	1	0	0	0	34	C[C@@H]1O[C@H](CC[C@@H]1O)O[C@@H]1C[C@H](O[C@H]2CC[C@H](O[C@@H]3C[C@H](O[C@H]4CC[C@H](O[C@@]5(C)CC(=O)[C@]6(O)C7=C(OC8=C(C=CC([C@H]9C[C@@H](O)[C@H](O[C@H]%10C[C@H](O)C(O[C@H]%11CC[C@H](O[C@@H]%12O[C@@H](C)C(=O)C=C%12)[C@H](C)O%11)[C@H](C)O%10)[C@@H](C)O9)=C8O)C7=O)C=C[C@]6(O)C5)O[C@H]4C)O[C@H](C)[C@H]3O)O[C@H]2C)O[C@H](C)[C@H]1O
BGC0001557	Paecilomyces	cornexistin	1	308.126	100.9	0.8137	6	2	Polyketide		2	0	0	0	21	CCC[C@H]1[C@H](C(=O)C[C@H](/C(=C/C)/CC2=C1C(=O)OC2=O)O)O
BGC0000783	Xanthomonas	o-antigen	1	-1					Saccharide		0	0	0	0	11
BGC0001470	Brevibacillus	macrobrevin	1	666.486	107.22	8.3722	6	4	Polyketide	Antibacterial	1	1	0	0	15	CCC(C)C(O)/C=C/C(C)=C/C=C/C(C)CC(C)C(O1)CC(O)C(C)/C=C/C=C/C(C)C/C=C(C)/C(O)/C=C/CC(O)C(C)/C=C/C1=O
BGC0000599	Bacillus	thuricin cd α	2	-1					RiPP		1	0	0	0	7
BGC0000834	Streptomyces	cathomycin	1	612.232	200.01	3.62712	11	5	Saccharide		1	0	0	0	20	CO[C@@H]1[C@@H](OC(N)=O)[C@@H](O)C(OC2=CC=C3C(O)=C(NC(=O)C4=CC(CC=C(C)C)=C(O)C=C4)C(=O)OC3=C2C)OC1(C)C
BGC0001038	Nonomuraea	pyralomicin 1a	1	455.054	125.29	2.27872	8	4	NRP	Antibacterial	1	1	0	0	27	CO[C@H]1[C@H](O)[C@@H](O)[C@@H](C=C1CO)N1C(Cl)=CC2=C1OC1=C(C(O)=C(Cl)C=C1C)C2=O
BGC0001411	Bacteroides	polysaccharide b	1	-1					Saccharide		0	0	0	0	30
BGC0000689	Micromonospora	2-deoxystreptamine	1	162.1	112.73	-2.8726	5	5	Saccharide		1	0	0	0	26	C1C(C(C(C(C1N)O)O)O)N
BGC0001404	Penicillium	sorbicillin	1	232.11	57.53	3.02964	3	2	Polyketide		2	0	0	0	7	C/C=C/C=C/C(=O)C1=CC(=C(C(=C1O)C)O)C
BGC0001076	Streptomyces	liposidomycin b	10	1022.41	386.44	-1.462	22	7	Other	Antibacterial,Inhibitor	1	1	0	0	25	O=S([O-])(O[C@H]([C@@H]([C@H](O1)CN)O)[C@@H]1O[C@@H]([C@@H]2N(C[C@@H]([C@H](N(C2=O)C)C(O)=O)OC(C[C@@H](OC(C[C@@H](CC(O)=O)C)=O)CCCCCCCCCC(C)C)=O)C)[C@@H](O[C@H]3N(C(N4)=O)C=CC4=O)[C@H]([C@H]3O)O)=O
BGC0001428	Myxococcus	myxochromide a	1	845.469	226.41	2.5098	9	5	NRP		0	0	0	0	24	CN([C@H]1[C@@H](C)OC(=O)CC[C@H](NC(=O)[C@H](NC(=O)[C@H]2CCCN2C(=O)[C@H](CC(C)C)NC(=O)[C@@H](NC1=O)C)C)C(=O)N)C(=O)/C=C/C=C/C=C/C=C/C=C/C=C/C=C/C=C/C
BGC0001986	Streptomyces	purincyclamide	1	-1					Other		1	0	0	0	5
BGC0001264	Phoma	betaenone a	3	366.241	97.99	2.5886	5	4	Polyketide		2	0	0	0	8	CCC(C)C1C2(C3C(CC(CC3C(C1(C)O)(/C(=C/O)/C2=O)O)(C)O)C)C
BGC0000929	Burkholderia	xanthothricin	1	193.06	82.67	-1.6262	7	0	Other		0	0	0	0	6	CN1N=CN=C2C(=O)N(C)C(=O)N=C12
BGC0000637	Corynebacterium	carotenoid	1	738.674	99.38	11.5564	6	4	Terpene		1	0	0	0	8	C[C@H](CCCCC(C)CCC[C@@H](C)CCCC(C)CCC=C(C)C)CCC[C@H](C)CCC[C@H](C)CCCC(C)(C)O[C@@H]1[C@@H]([C@H]([C@@H]([C@H](O1)CO)O)O)O
BGC0000899	Streptomyces	desosamine	1	175.121	52.93	-0.5953	4	2	Other		1	0	0	0	13	CC1CC(C(C(O1)O)O)N(C)C
BGC0000226	Streptomyces	gilvocarcin v	1	494.158	138.82	3.0077	9	4	Polyketide		1	0	0	0	27	[H][C@]1(O[C@@H]([C@H](O)[C@H]1O)C1=CC=C(O)C2=C1C1=C(C=C2OC)C2=C(OC)C=C(C=C)C=C2C(=O)O1)[C@@H](C)O
BGC0000872	Streptomyces	a-90289 a	2	1225.54	409.53	-0.3368	26	7	Other		1	0	0	0	29	CCCCCCCCCCCCCC(CC(=O)OC1CN(C)C(C(OC2OC(CN)C(O)C2O)C2OC(C(OS(O)(=O)=O)C2O)N2C=CC(=O)NC2=O)C(=O)N(C)C1C(O)=O)OC(=O)CC(C)CC(=O)OC1OC(C)C(OC)C(OC)C1OC
BGC0000224	Streptomyces	fredericamycin a	1	539.122	171.06	3.4067	9	4	Polyketide	Antibacterial,Antifungal,Cytotoxic,Inhibitor,antitumor	1	1	1	0	33	COC1=CC(=O)C2=C(C(O)=C3C(=O)[C@]4(CCC5=CC6=C(C(=O)NC(\C=C\C=C\C)=C6)C(O)=C45)C(=O)C3=C2O)C1=O
BGC0001680	Bradyrhizobiaceae	n-acyl alanine	1	-1					Other		0	0	0	0	1
BGC0000796	Paenibacillus	s-layer glycan	1	-1					Saccharide		1	0	0	0	21
BGC0000324	Streptomyces	coelibactin	1	-1					NRP		1	0	0	1	11
BGC0001334	Streptomyces	caldoniamide a	7	437.078	107.79	2.2965	6	3	Alkaloid		1	0	0	0	13	COC1=C2N(C3=C1C=CC=C3)[C@]1(O)C(=O)N(C)C(=O)[C@]1(O)C1=C2NC2=C1C=C(Cl)C=C2
BGC0001035	Glarea	pneumocandin b0	2	1064.56	411.28	-3.3413	17	15	Other	Antifungal	2	0	1	0	31	[H][C@@]12C[C@@H](O)CN1C(=O)[C@@]([H])(NC(=O)[C@@H](C[C@@H](O)[C@@H](O)NC(=O)[C@]1([H])[C@@H](O)CCN1C(=O)[C@@]([H])(NC(=O)[C@@]([H])(NC2=O)[C@H](O)[C@@H](O)C1=CC=C(O)C=C1)[C@H](O)CC(N)=O)NC(=O)CCCCCCCC[C@@H](C)C[C@@H](C)CC)[C@@H](C)O
BGC0000032	Streptomyces	a23187	1	523.268	126.68	5.5298	7	3	Polyketide		1	0	0	0	29	[H][C@@](C)(C(=O)C1=CC=CN1)[C@@]1([H])O[C@@]2(CC[C@@H](C)[C@@]([H])(CC3=NC4=C(O3)C=CC(NC)=C4C(O)=O)O2)[C@H](C)C[C@H]1C
BGC0000248	Streptomyces	naphtocyclinone	1	-1					Polyketide		1	0	0	0	4
BGC0001430	Stigmatella	myxochromide s	1	722.4	206.1	1.9626	8	5	NRP		0	0	0	0	20	CC(C[C@@H]1NC([C@@H](N(C)C(=O)/C=C/C=C/C=C/C=C/C=C/C=C/C=C/C)[C@@H](C)OC(=O)[C@H](CCC(=O)N)NC([C@H](C)NC(=O)[C@H](C)NC1=O)=O)=O)C
BGC0001512	Streptomyces	be-24566b	1	460.152	116.45	4.45842	7	4	Polyketide		1	0	0	0	20	CC1=CC(O)=CC2=C1C1OC(C)(CC3=C1C(O)=C1C(=O)C4=C(C=C(O)C=C4O)C(C)(C)C1=C3)O2
BGC0002001	Azotobacter	crochelin a	1	-1					NRP		0	0	0	0	26
BGC0001781	Planomonospora	sphaericin	1	-1					RiPP		1	0	0	0	4
BGC0001168	Streptomyces	livipeptin	1	347.16					NRP	Inhibitor	1	0	0	0	3
BGC0001626	Stachybotrys	isoindolinone	1	133.053	29.1	0.93	1	1	Polyketide		2	0	0	0	10	C1C2=CC=CC=C2C(=O)N1
BGC0001135	Xenorhabdus	bicornutin a1	2	825.589	445.14	-4.79282	11	19	NRP	Antibacterial	0	1	0	0	1	N[C@@H](CCCNC(N)=N)C(N[C@H](CC(C)C)C(N[C@@H](CCCNC(N)=N)C(N[C@@H](CCCNC(N)=N)C(N[C@H](CCCNC(N)=N)C(NCCCCN)=O)=O)=O)=O)=O
BGC0001694	Streptomyces	meoabyssomicin	2	-1					Polyketide		1	0	0	0	32
BGC0000604	Nonomuraea	ge2270a	1	1289.26	350.18	5.93372	24	7	RiPP	Antibacterial	1	1	0	0	18	CC1=C2C(=O)NCC(=O)NC(C3=NC(=CS3)C4=NC(=CS4)C5=C(C=CC(=N5)C6=NC(=CS6)C7=NC(CO7)C(=O)N8CCCC8C(=O)N)C9=NC(=CS9)C(=O)NC(C3=NC(=C(S3)COC)C(=O)NC(C(=N2)S1)CC(=O)NC)C(C)C)C(C1=CC=CC=C1)O
BGC0000172	Brevibacillus	basiliskamide a	2	385.225	89.62	3.6425	4	2	Polyketide		1	0	0	0	22	CC[C@@H](C)[C@H](OC(=O)\C=C\C1=CC=CC=C1)[C@H](C)[C@H](O)C\C=C\C=C/C(N)=O
BGC0000639	Enterobacteriaceae	carotenoid	1	738.674	99.38	11.5564	6	4	Terpene		0	0	0	0	6	C[C@H](CCCCC(C)CCC[C@@H](C)CCCC(C)CCC=C(C)C)CCC[C@H](C)CCC[C@H](C)CCCC(C)(C)O[C@@H]1[C@@H]([C@H]([C@@H]([C@H](O1)CO)O)O)O
BGC0001773	Pseudonocardia	selvamicin	1	912.508	274.75	1.3798	17	10	Polyketide		1	0	0	0	27	CCC1C(C(C(/C=C\C=C/C=C\C=C/C=C\C(C[C@H]2[C@@]([C@H](C[C@](O2)(C[C@H](C[C@H]([C@@H](CCC(=O)O1)O)O)O)O)O)(C)O)O[C@H]3[C@H]([C@H]([C@@H]([C@H](O3)C)O)O)O)C)[C@H]4C[C@H]([C@H]([C@@H](O4)C)OC)O)C
BGC0001245	Lasiodiplodia	lasiodiplodin	1	292.167	55.76	3.8428	4	1	Polyketide		2	0	0	0	6	C[C@H]1CCCCCCCC2=CC(=CC(=C2C(=O)O1)OC)O
BGC0000334	Tolypocladium	cyclosporine	1	1201.84	278.8	3.269	12	5	NRP		2	0	0	0	2	CC[C@H]1C(=O)N(CC(=O)N([C@H](C(=O)N[C@H](C(=O)N([C@H](C(=O)N[C@H](C(=O)N[C@@H](C(=O)N([C@H](C(=O)N([C@H](C(=O)N([C@H](C(=O)N([C@H](C(=O)N1)[C@@H]([C@H](C)C/C=C/C)O)C)C(C)C)C)CC(C)C)C)CC(C)C)C)C)C)CC(C)C)C)C(C)C)CC(C)C)C)C
BGC0000970	Chondromyces	chondrochloren a	1	525.249	125.32	3.8621	7	4	NRP		0	0	0	0	18	CCCC[C@@H](C)[C@H](O)[C@H](C)C(=O)C(\C)=C\[C@@H](OC)[C@@H](O)[C@@H](OC)C(=O)N\C=C/C1=CC=C(O)C(Cl)=C1
BGC0002013	Streptomyces	curacozole	1	-1					RiPP		1	0	0	0	11
BGC0000287	Pseudomonas	l-2-amino-4-methoxy-trans-3-butenoic acid	1	131.058	72.55	-0.4416	3	2	NRP		0	0	0	0	10	CO\C=C\[C@H](N)C(O)=O
BGC0001106	Streptomyces	oxalomycin b	1	655.347	171.66	2.4284	10	4	NRP		1	0	0	0	33	COC(CC(C)C(O)\C=C\C=C\CNC(=O)C(C)(C)C(O)C(\C)=C\C=C\C=C\CC1=CN=CO1)C1(O)C(C)C(=O)N(C)C11COC1=O
BGC0001402	Talaromyces	cyclochlorotine	5	571.16	177.17	-1.4778	7	6	NRP		2	0	0	0	8	[H][C@@]12[C@H](Cl)[C@H](Cl)CN1C(=O)[C@H](CO)NC(=O)C[C@@H](NC(=O)[C@H](CO)NC(=O)[C@H](CC)NC2=O)C1=CC=CC=C1
BGC0001780	Herpetosiphon	siphonazole	1	463.174	127.69	4.06144	8	2	NRP		1	0	0	0	10	COC1=C(O)C=C(\C=C\C2=NC(C(=O)CC3=NC(C(=O)NC\C=C\C=C)=C(C)O3)=C(C)O2)C=C1
BGC0000515	Geobacillus	geobacillin i	1	3262.5					RiPP	Antibacterial	1	1	0	0	10
BGC0001479	Nostoc	anabaenopeptin nz857	2	857.432	255.6	2.2859	9	9	NRP	Inhibitor	0	0	0	0	1	CC[C@H](C)[C@@H]1NC(=O)[C@@H](CCCCNC(=O)[C@H](CCC2=CC=C(O)C=C2)NC(=O)CN(C)C(=O)[C@H](CCC2=CC=C(O)C=C2)NC1=O)NC(=O)N[C@@H](CC1=CC=CC=C1)C(O)=O
BGC0000663	Streptomyces	hopene	1	454.417	20.23	8.6625	1	1	Terpene		1	0	0	0	13	CC(CCCO)[C@H]1CC[C@@]2(C)[C@H]1CC[C@]1(C)[C@@H]2CC[C@@H]2[C@@]3(C)CCCC(C)(C)[C@@H]3C=C[C@@]12C
BGC0000855	Methylomicrobium	ectoine	1	142.074	61.69	-0.1487	3	2	Other		0	0	0	0	4	CC1=NCC[C@H](N1)C(=O)O
BGC0001410	Bacteroides	polysaccharide a	1	-1					Saccharide		0	0	0	0	15
BGC0000602	Bacillus	subtilosin a	1	3013.45	1176.9	-14.5207	43	42	RiPP		1	0	0	0	8	CC[C@H](C)[C@@H](C(=O)N[C@@H](C)C(=O)NCC(=O)N[C@@H](C)C(=O)NCC(=O)O)NC(=O)CNC(=O)[C@H](CC(=O)O)NC(=O)[C@@H]1CCCN1C(=O)[C@H]([C@@H](C)CC)NC(=O)[C@@H]2CCCN2C(=O)CNC(=O)[C@H](CC(=O)O)NC(=O)[C@H](C(C)C)NC(=O)[C@H](CC(C)C)NC(=O)[C@H](CS)NC(=O)[C@H](C)NC(=O)[C@H](C)NC(=O)CNC(=O)[C@H]([C@@H](C)CC)NC(=O)[C@H](CO)NC(=O)[C@H](CS)NC(=O)[C@H]([C@@H](C)O)NC(=O)[C@H](C)NC(=O)[C@H](CS)NC(=O)CNC(=O)[C@H](CCCCN)N…
BGC0000107	Aspergillus	naphthopyrone	1	-1					Polyketide		2	0	0	0	1
BGC0001297	Streptomyces	ws9326	1	-1					NRP		1	0	0	0	40
BGC0001904	Micromonospora	fluostatin	1	-1					Polyketide		1	0	0	0	31
BGC0001471	Amycolatopsis	saalfelduracin	1	1636.39	539.55	0.9743	31	18	RiPP	Antibacterial	1	1	0	0	19	C[C@H]([C@H](NC1=S)C2=NC([C@](N3)([H])[C@](C4=NC(C(N[C@@](C(N/C(C5=N[C@](C(N[C@](C(C)(O)[C@@H](C)O)([H])C6=NC1=CS6)=O)([H])CS5)=C\C)=O)([H])[C@@H](C)O)=O)=CS4)(NC(C(NC(C(NC(C(NC([C@@](C)([H])N[C@@H]7C=CC8=C(N=C9C=C8[C@@H](O)C)[C@H]7O)=O)=C)=O)=C)=O)=C)=O)CCC3C%10=NC(C(NC(C(NC(C(O)=O)=C)=O)=C)=O)=CS%10)=CS2)OC9=O
BGC0000482	uncultured	trunkamide	1	837.446	196.63	2.5885	10	5	RiPP	Cytotoxic	3	0	0	0	1	CC[C@H](C)[C@H]1C(=O)N[C@H](C(=O)N2CCC[C@H]2C(=O)N[C@H](C3=N[C@@H](CS3)C(=O)N[C@H](C(=O)N[C@H](C(=O)N1)COC(C)(C)C=C)[C@@H](C)OC(C)(C)C=C)CC4=CC=CC=C4)C
BGC0001233	Streptomyces	feglymycin	1	1899.65	733.04	3.478	29	29	NRP		1	0	0	0	19	CC(C)C(NC(=O)C(NC(=O)C(N)C1=CC=C(O)C=C1)C1=CC(O)=CC(O)=C1)C(=O)NC(C(=O)NC(C(=O)NC(C(=O)NC(C(=O)NC(C(=O)NC(C(C)C)C(=O)NC(C(=O)NC(C(=O)NC(CC1=CC=CC=C1)C(=O)NC(CC(O)=O)C(O)=O)C1=CC=C(O)C=C1)C1=CC(O)=CC(O)=C1)C1=CC(O)=CC(O)=C1)C1=CC=C(O)C=C1)C1=CC(O)=CC(O)=C1)C1=CC=C(O)C=C1)C1=CC(O)=CC(O)=C1
BGC0000173	Burkholderia	isobongkrekic acid	2	486.262	121.13	5.8856	4	3	Polyketide		0	0	0	0	14	C[C@@H](C/C=C/CC/C=C/C=C\C[C@H](/C(=C\C=C(/C)\C(=O)O)/C)OC)/C=C/C(=C\C(=O)O)/CC(=O)O
BGC0001453	Streptomyces	desferrioxamine	1	560.353	205.84	0.9221	9	6	Other		1	0	0	1	6	CC(=O)N(CCCCCNC(=O)CCC(=O)N(CCCCCNC(=O)CCC(=O)N(CCCCCN)O)O)O
BGC0000059	Streptomyces	filipin	1	654.398	208.37	1.888	11	9	Polyketide		1	0	0	0	13	CCCCC[C@H]([C@@H]1[C@H](C[C@H](C[C@H](C[C@H](C[C@H](C[C@H](C[C@@H](/C(=C/C=C/C=C/C=C/C=C/[C@@H]([C@H](OC1=O)C)O)/C)O)O)O)O)O)O)O)O
BGC0001481	Fusarium	α-acorenol	1	222.198	20.23	3.92	1	1	Terpene		2	0	0	0	1	C[C@H]1CCC([C@@]12CCC(=CC2)C)C(C)(C)O
BGC0000423	Streptomyces	scabichelin	1	647.36	279.23	-4.0146	13	10	NRP		1	0	0	1	10	CN[C@@H](CCCN(O)C=O)C(=O)N[C@@H](CO)C(=O)N(O)CCC[C@H](NC)C(=O)N[C@@H](CCCN)C(=O)N[C@@H]1CCCN(O)C1=O
BGC0000142	Salinispora	salinilactam	1	469.283	110.02	3.2043	5	5	Polyketide		1	0	0	0	25	CC1C\C=C\C=C\C=C(/C)\C=C\C=C\C=C\[C@H](O)C[C@H](O)C(O)[C@H](O)C(C)\C=C\C=C\C(=O)N1
BGC0000958	Streptomyces	antimycin	1	548.273	157.33	3.4804	9	3	NRP	Antifungal,Cytotoxic	1	0	1	0	15	CCCCCC[C@@H]1[C@H]([C@@H](OC(=O)[C@H]([C@H](OC1=O)C)NC(=O)C2=C(C(=CC=C2)NC=O)O)C)OC(=O)CC(C)C
BGC0001505	Sphaerospermopsis	anacyclamide d8p	1	-1					RiPP		0	0	0	0	10
BGC0000857	Methylophaga	ectoine	1	142.074	61.69	-0.1487	3	2	Other		0	0	0	0	5	CC1=NCC[C@H](N1)C(=O)O
BGC0001104	Myxococcus	myxovirescin a1	1	623.44	142.39	5.1984	8	4	NRP		0	0	0	0	12	CCC[C@@H]1OC(=O)[C@@H](C)C[C@H](C)CCCCC(=O)CCCC(CC)\C=C\C=C(COC)\CC[C@@H](O)[C@@H](O)C[C@H](O)CNC1=O
BGC0000631	Botrytis	botrydial	1	310.178	80.67	1.7554	5	1	Terpene	phytotoxic	2	0	0	0	15	[H][C@@]12[C@H](C[C@@H](C)[C@H](C=O)[C@]1(O)[C@](C)(CC2(C)C)C=O)OC(C)=O
BGC0001690	Streptomyces	natamycin	1	665.305	230.99	0.1197	13	7	Polyketide		1	0	1	0	22	C[C@@H]1C/C=C/C=C/C=C/C=C/[C@@H](C[C@H]2[C@@H]([C@H](C[C@](O2)(C[C@H](C[C@@H]3[C@H](O3)/C=C/C(=O)O1)O)O)O)C(=O)O)O[C@H]4[C@H]([C@H]([C@@H]([C@H](O4)C)O)N)O
BGC0001420	Hyalangium	myxochromide d	1	736.416	206.1	2.3527	8	5	NRP		0	0	0	0	22	C1(=O)N[C@@H](CC(C)C)C(=O)N[C@@H](C)C(=O)N[C@@H](CCC(=O)N)C(=O)O[C@H](C)[C@H](N(C)C(=O)/C=C/C=C/C=C/C=C/C=C/C=C/C=C/CC)C(=O)N[C@@H]1C
BGC0000013	Aspergillus	alternariol	1	258.053	90.9	2.37142	5	3	Polyketide		2	0	0	0	2	CC1=CC(=CC2=C1C3=CC(=CC(=C3C(=O)O2)O)O)O
BGC0000546	Streptomyces	sal-2242	1	2242.22					RiPP		1	0	0	0	9
BGC0001943	Cystobacter	vioprolides a	4	-1					NRP		0	0	0	0	12
BGC0001584	Streptomyces	c-1027	1	843.241	217.8	2.8038	15	5	Polyketide		1	0	0	0	56	C=c7oc6cc(OC)cc(C(=O)O[C@H]1COC(=O)C[C@H](N)c5cc(O)c(O[C@@H]3C#C/C=C1\C#C/C2=C/C=C\[C@@]23OC4OC(C)(C)C(N(C)C)C(O)C4O)c(Cl)c5)c6[nH]c7=O
BGC0001213	Streptomyces	nataxazole	1	400.106	98.59	5.10362	7	1	Polyketide		1	0	0	0	27	COC(=O)C1=C2N=C(OC2=CC=C1)C1=C2N=C(OC2=CC=C1)C1=C(C)C=CC=C1O
BGC0001302	Streptomyces	lomofungin	1	314.054	129.58	1.0382	7	3	Other		1	0	0	0	23	COC(=O)C1=C2C(=C(C=C1)O)NC3=C(C(=CC(=O)C3=N2)O)C=O
BGC0001718	Aspergillus	okaramine d	1	582.248	129.57	2.5065	7	4	NRP		2	0	0	0	5	CO[C@@H]1[C@@]2(O)N(C(=O)\C3=C\C4=C(NC5=C4C=CC=C5)C(C)(C)\C=C/N3C2=O)[C@]23[C@H](CO)C(C)(C)N2C2=C(C=CC=C2)[C@]13O
BGC0001576	Prochloron	divamide a	1	2020.92	737.52	-8.8506	29	26	RiPP		0	0	0	0	8	CC[C@H](C)[C@H]1C(=O)N[C@H](C(=O)N[C@@H]2[C@@H](SC[C@H]3C(=O)N[C@@H](CNCCCC[C@H](NC(=O)[C@H]4[C@@H](SC[C@@H](C(=O)N[C@H](C(=O)N[C@H](C(=O)N[C@H]([C@@H](SC[C@@H](C(=O)N[C@H](C(=O)NCC(=O)N[C@H](C(=O)N4)[C@@H](C)O)[C@H](C(=O)O)O)NC(=O)[C@@H](NC(=O)[C@@H](NC2=O)[C@@H](C)CC)C(C)C)C)C(=O)N3)CO)C)NC(=O)[C@H](CCC(=O)O)[N+](C)(C)C)C)C(=O)O)C(=O)N[C@H](C(=O)NCC(=O)N1)CC5=CC=CC=C5)C)C(C)C
BGC0001386	Streptomyces	jbir-76	2	306.074	109.36	1.4719	7	3	Polyketide		1	0	0	0	25	COC1C2=COC(CO)=C2C(=O)C2=C(O)C(OC)=C(O)C=C12
BGC0000651	Streptomyces	ks-505a	1	1092.6	265.27	7.0159	15	7	Terpene		1	0	0	0	27	CC1CC2C(CCC3C2(C(CC(C3(C)C(=O)O)OC4C(C(C(C(O4)C(=O)O)O)O)OC)C)C)(C5C1(C6CCC7(C(C6(CC5)C)CCC8(C7CCC9(C8CC1=C(O9)C=CC2=C1C(=O)OC2(CCC(=O)OC)O)CO)C)CO)C)C
BGC0000249	Streptomyces	nogalamycin	1	599.2	192.52	0.5879	13	5	Polyketide		1	1	0	0	10	CO[C@H]1C[C@](C)(O)[C@H](C(=O)OC)C2=C1C(O)=C1C(=O)C3=C(O)C=C4C(O[C@@H]5O[C@@]4(C)[C@H](O)[C@H]([C@@H]5O)N(C)C)=C3C(=O)C1=C2
BGC0001634	Streptomyces	keywimysin	1	-1					RiPP		1	0	0	0	5
BGC0001206	Streptomyces	indolmycin	1	257.116	66.48	1.7722	3	2	Other		1	0	0	0	9	[H][C@](C)(C1=CNC2=CC=CC=C12)[C@@]1([H])OC(NC)=NC1=O
BGC0000688	Diaporthe	copalyl diphosphate	1	450.194	113.29	5.738	4	3	Terpene		2	0	0	0	7	C/C(=C\COP(=O)(O)OP(=O)(O)O)/CC[C@H]1C(=C)CC[C@@H]2[C@@]1(CCCC2(C)C)C
BGC0001681	Bacteroides	n-acyl glycine	1	-1					Other		0	0	0	0	2
BGC0001248	Hypholoma	clavaric acid	1	618.413	141.36	5.9904	7	4	Terpene		2	0	0	0	1	[H][C@@]1(CC[C@@]2(C)C3=C(CC[C@]12C)[C@@]1(C)C[C@@H](OC(=O)CC(C)(O)CC(O)=O)C(=O)C(C)(C)[C@]1([H])CC3)[C@H](C)CCC(O)C(C)(C)O
BGC0000061	Streptomyces	levorin a3	5	1110.59	367.38	3.4042	19	12	Polyketide		1	0	0	0	21	C[C@H]1/C=C/C=C/C=C\C=C/C=C/C=C/C=C/[C@@H](C[C@@H]([C@@H]([C@H](CC(=O)C[C@H](C[C@H](C[C@H](CC(=O)CCCC(CC(=O)O[C@@H]1[C@@H](C)C[C@H](C)[C@H](CC(=O)C2=CC=C(C=C2)N)O)O)O)O)O)O)C(=O)O)O)O[C@H]3[C@H]([C@H]([C@@H]([C@H](O3)C)O)N)O
BGC0001555	Escherichia	colicin v	1	-1					RiPP		0	0	0	0	164
BGC0001737	Corallococcus	phenalamide	1	491.34	69.56	6.2568	3	3	NRP		0	0	0	0	10	CC(CCC1=CC=CC=C1)/C=C(\C)/C(C(C)/C=C(\C)/C=C/C=C\C=C\C=C(/C)\C(=O)NC(C)CO)O
BGC0000707	Streptomyces	kasugamycin	1	379.159	221.31	-4.5377	10	8	Saccharide		1	1	0	0	9	CC1C(CC(C(O1)OC2C(C(C(C(C2O)O)O)O)O)N)N=C(C(=O)O)N
BGC0001360	Penicillium	mycophenolic acid	1	391.919	37.53	3.70164	4	1	Polyketide		2	0	0	0	8	Cc1c(c(n2c(cnc2c1Br)CSCCO)C)Br
BGC0001520	Bacillus	aurantinin b	3	780.408	197.12	4.9157	11	5	Polyketide		1	0	0	0	28	CC(CC(O)C(C)C(O)=O)C\C(C)=C\C=C\C=C\C1C(C)=CC2C(CCC(C)C2O[C@H]2O[C@@H](C)[C@H](O)C(=O)[C@@H]2O)C2\C1=C1\C(C)C(O)C\C\1=C(C)\C(=O)OC2=O
BGC0001701	Blautia	nisin o	1	-1					RiPP		1	0	0	0	15
BGC0001185	Bacillus	bacillibactin	1	882.256	374.88	-2.2269	18	12	NRP		1	0	0	1	5	C[C@@H]1[C@@H](C(=O)O[C@@H]([C@@H](C(=O)O[C@@H]([C@@H](C(=O)O1)NC(=O)CNC(=O)C2=C(C(=CC=C2)O)O)C)NC(=O)CNC(=O)C3=C(C(=CC=C3)O)O)C)NC(=O)CNC(=O)C4=C(C(=CC=C4)O)O
BGC0001421	Myxococcus	myxochromide b	1	932.537	255.51	2.4845	10	6	NRP		0	0	0	0	22	C(=C/C=C/C=C/C=C/C=C/C=C/C)\C=C\C(=O)N(C)[C@H]1[C@@H](C)OC([C@@H](NC(=O)[C@@H](NC([C@@H]2CCCN2C(=O)[C@H](CC(C)C)NC(=O)[C@H](CC(C)C)NC(=O)[C@@H](C)NC1=O)=O)C)CCC(=O)N)=O
BGC0001562	Streptomyces	curacomycin	1	789.394	279.73	-0.3805	9	10	NRP		1	0	0	0	11	CC[C@H](C)[C@@H]3NC(=O)[C@@H](CC(C)C)NC(=O)[C@@H](C(C)C)NC(=O)[C@H](Cc1c[nH]c2ccc(Cl)cc12)NC(=O)C(C(O)C(N)=O)NC(=O)[C@H](CCCN)NC3=O
BGC0000478	uncultured	patellin 6	2	962.53	216.94	3.214	11	5	RiPP		3	0	0	0	1	C[C@H]([C@H]1C(=O)N[C@H](C2=N[C@@H](CS2)C(=O)N[C@H](C(=O)N[C@H](C(=O)N3CCC[C@H]3C(=O)N[C@H](C(=O)N4CCC[C@H]4C(=O)N1)C(C)C)CC5=CC=CC=C5)[C@@H](C)OC(C)(C)C=C)C(C)C)OC(C)(C)C=C
BGC0000178	Chitinophaga	elansolid a1	1	620.371	127.45	6.689	6	5	Polyketide	Antibacterial,Cytotoxic	0	1	0	0	20	[C@@]1(C)(O)C[C@@](C)(C)C2C1C=C(C)C([H])(/C=C\C=C\C=C/C(C(C)C(C/C=C(/C=C/C(O)=O)\C)O)O)C2C(OC)C1=CC=C(O)C=C1
BGC0000540	Paenibacillus	paenibacillin	1	-1					RiPP		1	0	0	0	11
BGC0001594	Fischerella	fischerindole l	1	338.155	28.15	5.1855	1	1	Alkaloid		0	0	0	0	31	[C]=NC1C2c3c([nH]c4ccccc34)C(C)(C)C2CC(Cl)C1(C)C=C
BGC0000001	Verrucosispora	abyssomicin c	2	346.142	89.9	1.3221	6	1	Polyketide	Antibacterial,Cytotoxic	1	1	0	0	28	CC1C[C@]23OC(=O)C4=C2OC1C(O)C3\C=C/C(=O)[C@@H](C)C[C@@H](C)C4=O
BGC0001919	Streptomyces	neoantimycin	1	-1					NRP		1	0	0	0	20
BGC0000291	Streptomyces	a54145	1	-1					NRP		1	0	0	0	60
BGC0000304	Fusarium	apicidin	1	623.368	138.84	3.067	7	3	NRP		2	0	0	0	11	[H][C@]12CCCCN1C(=O)[C@@H](NC(=O)[C@H](CC1=CN(OC)C3=C1C=CC=C3)NC(=O)[C@H](CCCCCC(=O)CC)NC2=O)C(C)CC
BGC0001755	Streptomyces	reedsmycins	1	-1					Polyketide		1	0	0	0	20
BGC0001069	Sorangium	chivosazol	1	865.498	179.4	6.8834	13	4	NRP	Cytotoxic	0	0	0	0	9	CO[C@H]1[C@@H](OC2\C=C/C=C/C3=COC(=N3)C(C)C(CC(O)\C=C\C=C\C=C/C(C)C(OC(=O)\C=C/C=C/C=C\C(\C)=C\C2C)C(C)C(O)CC(C)O)OC)O[C@H](C)[C@@H](O)[C@@H]1OC
BGC0001950	Cylindrospermum	puwainaphycin f	2	-1					NRP		0	0	0	0	9
BGC0001244	Parastagonospora	(-)-mellein	1	178.063	46.53	1.4936	3	1	Polyketide		2	0	0	0	1	C[C@@H]1CC2=C(C(=CC=C2)O)C(=O)O1
BGC0001324	Solanum	monoterpenes-diterpenes	1	-1					Terpene		3	0	0	0	17
BGC0001990	Aspergillus	xanthocillin	1	-1					Other		2	0	0	0	7
BGC0001621	Aspergillus	imizoquin a	6	-1					NRP		2	0	0	0	10
BGC0001916	Streptomyces	lavendiol	1	-1					Polyketide		1	0	0	0	31
BGC0001210	Bacillus	pseudomycoicidin	1	-1					RiPP		1	0	0	0	6
BGC0000295	Acinetobacter	acinetoferrin	1	584.342	196.81	2.3035	8	6	NRP		0	0	0	1	10	CCCCC\C=C\C(=O)N(O)CCCNC(=O)CC(O)(CC(=O)NCCCN(O)C(=O)\C=C\CCCCC)C(O)=O
BGC0000622	Bacillus	megacin	1	-1					RiPP		1	0	0	0	8
BGC0000091	Streptomyces	marineosin a	2	409.273	62.4	5.3524	3	2	Polyketide		1	0	0	0	22	[H][C@]12C[C@H](C)O[C@]3(N=C(C[C@H]3OC)C3=CC=CN3)[C@]1([H])C1=CC=C(CCCCCCC2)N1
BGC0000253	Streptomyces	oviedomycin	1	350.043	128.97	0.88782	7	3	Polyketide	Cytotoxic	1	0	0	0	24	CC1=C(O)C(=O)C2=C(C=C(O)C3=C2C(=O)C2=CC=CC(O)=C2C3=O)C1=O
BGC0001933	Sphaerospermopsis	sphaerocyclamide	1	-1					RiPP		0	0	0	0	10
BGC0000453	Streptomyces	valinomycin	1	1110.63	332.4	2.3433	18	6	NRP	Antibacterial,Antifungal,Cytotoxic,Antiviral	1	1	1	1	18	CC(C)[C@@H]1NC(=O)C(C)OC(=O)[C@H](NC(=O)[C@H](OC(=O)[C@@H](NC(=O)[C@H](C)OC(=O)[C@H](NC(=O)[C@H](OC(=O)[C@@H](NC(=O)[C@H](C)OC(=O)[C@H](NC(=O)[C@H](OC1=O)C(C)C)C(C)C)C(C)C)C(C)C)C(C)C)C(C)C)C(C)C)C(C)C
BGC0000976	Moorea	curacin a	1	373.244	21.59	6.3665	3	0	NRP	anti-tubulin	0	0	0	0	15	CO[C@H](CC\C(C)=C\C=C\CC\C=C/[C@H]1CSC(=N1)[C@@H]1C[C@@H]1C)CC=C
BGC0000010	Aspergillus	aflatoxin	1	328.058	84.2	1.8605	7	0	Polyketide		2	0	0	0	22	COC1=C2C3=C(C(=O)OCC3)C(=O)OC2=C4C5C=COC5OC4=C1
BGC0001120	Burkholderia	burkholderic acid	1	306.183	63.6	4.5251	4	1	NRP	Antibacterial,Cytotoxic,Siderophore,Virulence factor	0	1	0	1	29	CCCCCCC/C=C(\C)/C(=C1C=C(OC1=O)C(=O)CC)O
BGC0001211	Amycolatopsis	albachelin	1	-1					NRP		1	0	0	1	10
BGC0000050	Streptomyces	e-837	1	378.241	86.99	3.5651	5	3	Polyketide		1	0	0	0	8	C\C=C(/C)C(O)C(C)\C=C\C=C(/C)CCC(O)CC1=C(C)C(=O)C(C)(O)O1
BGC0000118	Streptomyces	pactamycin	1	558.269	194.68	0.75452	10	7	Polyketide		1	0	0	0	28	CC1=C(C(=CC=C1)O)C(=O)OC[C@]2([C@H]([C@@H]([C@]([C@@]2(C)O)([C@H](C)O)NC(=O)N(C)C)N)NC3=CC=CC(=C3)C(=O)C)O
BGC0001897	Burkholderia	cepacin a	1	-1					Polyketide		0	0	0	0	16
BGC0000685	Alternaria	brassicicene c	1	348.23	66.76	2.8886	4	2	Terpene		2	0	0	0	9	[H][C@@]12CC[C@](O)(COC)\C1=C\[C@@]1([H])[C@H](C)C(=O)C(C(C)C)=C1C[C@H](O)[C@@H]2C
BGC0001967	Streptomyces	acyldepsipeptide 1	1	-1					NRP		1	0	0	0	19
BGC0002028	Streptomyces	frigocyclinone	1	-1					Polyketide		1	0	0	0	29
BGC0001304	Aspergillus	aflavarin	1	454.126	117.57	3.40152	9	1	Polyketide		2	0	0	0	5	CC1=CC(=C(C2=C1C(=CC(=O)O2)OC)C3=C(C4=C(C=C(C=C4CO)OC)OC3=O)OC)OC
BGC0000054	Aeromicrobium	erythromycin	1	733.461	193.91	1.7856	14	5	Polyketide		1	1	0	0	31	CC[C@@H]1[C@@]([C@@H]([C@H](C(=O)[C@@H](C[C@@]([C@@H]([C@H]([C@@H]([C@H](C(=O)O1)C)O[C@H]2C[C@@]([C@H]([C@@H](O2)C)O)(C)OC)C)O[C@H]3[C@@H]([C@H](C[C@H](O3)C)N(C)C)O)(C)O)C)C)O)(C)O
BGC0000745	Streptococcus	capsular polysaccharide	1	1322.45	660.55	-16.7828	38	25	Saccharide		1	0	0	0	7	CC(=O)N[C@@H]1[C@H](C[C@@](O[C@H]1[C@@H]([C@@H](CO)O)O)(C(=O)O)O[C@H]2[C@H]([C@H](O[C@H]([C@@H]2O)O[C@@H]3[C@H](O[C@@H]([C@@H]([C@H]3O)NC(=O)C)OC[C@@H]4[C@H]([C@@H]([C@H]([C@H](O4)O[C@H]5[C@H](O[C@H]([C@@H]([C@H]5O[C@H]6[C@@H]([C@H]([C@@H]([C@H](O6)CO)O)O)O)O)O[C@@H]7[C@H](O[C@H]([C@@H]([C@H]7O)O)O)CO)CO)O)O)O)CO)CO)O)O
BGC0000865	Photobacterium	eicoseicosapentaenoic acid	1	302.225	37.3	5.9927	1	1	Other		0	0	0	0	19	CC/C=C\C/C=C\C/C=C\C/C=C\C/C=C\CCCC(=O)O
BGC0000109	Streptomyces	ll-f28249α	1	612.366	114.68	5.0874	8	3	Polyketide		1	0	0	0	12	[H][C@@]12OC\C3=C/C=C/[C@H](C)C\C(C)=C\C[C@@H]4C[C@@H](C[C@]5(C[C@H](O)[C@H](C)[C@H](O5)C(\C)=C\C(C)C)O4)OC(=O)[C@H](C=C(C)[C@H]1O)[C@@]23O
BGC0000779	Aeromonas	lipopolysaccharide	1	-1					Saccharide		0	0	0	0	5
BGC0001600	Fusarium	fusarielin h	1	386.282	52.99	4.8204	3	2	Polyketide		2	0	0	0	8	C/C=C([C@H]1[C@@H](/C=C/C=C([C@@H](O)[C@H](CO)C)\C)[C@]2([H])CC=C(C)C[C@@]2([H])[C@H]3[C@]1(C)O3)\C
BGC0000088	Aspergillus	monacolin k	1	404.256	72.83	4.1955	5	1	Polyketide		2	0	0	0	17	[H][C@]12[C@H](C[C@@H](C)C=C1C=C[C@H](C)[C@@H]2CC[C@@H]1C[C@@H](O)CC(=O)O1)OC(=O)[C@H](C)CC
BGC0000489	Enterococcus	enterocin as-48	1	-1					RiPP		1	0	0	0	8
BGC0001935	Streptomyces	3,7-dihydroxytropolone	1	-1					Other		1	0	0	0	9
BGC0001335	uncultured	borregomycin a	4	501.049	112.17	2.5193	7	2	Alkaloid	Cytotoxic	3	0	0	0	18	O=C1[C@]2(OC)N3C(C4=C([C@]2(OC)C(N1C)=O)C5=CC=C(Cl)C=C5N4)(O)C(C6=CC=C(Cl)C=C63)=O
BGC0000986	Stigmatella	dkxanthene	1	-1					NRP		0	0	0	0	17
BGC0000135	Streptomyces	reveromycin a	1	660.351	176.89	6.1313	8	4	Polyketide		1	0	0	0	33	CCCCC1(CCC2(CCC(C)C(CC=C(C)C=CC(O)C(C)C=CC(O)=O)O2)OC1C=CC(C)=CC(O)=O)OC(=O)CCC(O)=O
BGC0001191	Amycolatopsis	a-102395	1	-1					Other		1	0	0	0	15
BGC0000367	Brevibacillus	gramicidin	1	1881.07	548.99	4.3723	17	21	NRP		1	1	0	0	12	C[C@@H](C(=O)N[C@H](CC(C)C)C(=O)N[C@@H](C)C(=O)N[C@H](C(C)C)C(=O)N[C@@H](C(C)C)C(=O)N[C@@H](C(C)C)C(=O)N[C@@H](CC1=CNC2=CC=CC=C21)C(=O)N[C@H](CC(C)C)C(=O)N[C@@H](CC3=CNC4=CC=CC=C43)C(=O)N[C@H](CC(C)C)C(=O)N[C@@H](CC5=CNC6=CC=CC=C65)C(=O)N[C@H](CC(C)C)C(=O)N[C@@H](CC7=CNC8=CC=CC=C87)C(=O)NCCO)NC(=O)CNC(=O)[C@H](C(C)C)NC=O
BGC0001657	Lysobacter	lysocin	1	1616.87	652.38	-4.8105	21	21	NRP		0	0	0	0	21	CC[C@H](C)[C@H]1C(=O)N[C@H](C(=O)O[C@@H]([C@@H](C(=O)N[C@@H](C(=O)N[C@H](C(=O)NCC(=O)N([C@@H](C(=O)N[C@H](C(=O)N[C@@H](C(=O)N[C@H](C(=O)N[C@@H](C(=O)N[C@@H](C(=O)N1)CC2=CNC3=CC=CC=C32)CCC(=O)N)CCC(=O)O)CCCN=C(N)N)CC(C)C)CC4=CC=CC=C4)C)CO)CCCN=C(N)N)NC(=O)C[C@@H](CC(C)C)O)C)[C@@H](C)O
BGC0001954	Talaromyces	wortmanamide a	2	-1					NRP		2	0	0	0	6
BGC0000366	Streptomyces	gobichelin a	2	671.303	273.69	-2.4245	12	9	NRP		1	0	0	0	18	C1C[C@@H](C(=O)N(C1)O)NC(=O)[C@H](CO)NC(=O)[C@@H](CCCCN)NC(=O)[C@H](CC2=CN=CN2)NC(=O)[C@@H]3COC(=N3)C4=CC=CC=C4O
BGC0000525	Bacillus	lichenicidin vk21 a1	2	-1					RiPP		1	0	0	0	3
BGC0000442	Aspergillus	terrequinone a	1	490.226	85.95	7.3438	3	3	NRP	Cytotoxic	2	0	0	0	5	CC(C)=CCC1=C(C2=CNC3=C2C=CC=C3)C(=O)C(O)=C(C2=C(NC3=C2C=CC=C3)C(C)(C)C=C)C1=O
BGC0000306	Streptomyces	arylomycin	1	880.495	255.01	3.816	10	8	NRP	Antibacterial	1	1	0	0	9	CCCCCCCCCCCCCCCC(=O)N(C)[C@H](CO)C(=O)N[C@H](C)C(=O)NCC(=O)N(C)[C@H]1C2=CC(=C(C=C2)O)C3=C(C=CC(=C3)C[C@H](NC(=O)[C@@H](NC1=O)C)C(=O)O)O
BGC0000553	Streptomyces	sro15-2212	1	2212.18					RiPP		1	0	0	0	7
BGC0000430	Nodularia	spumigin e	1	610.311	220.67	0.0931	8	7	NRP	Inhibitor	0	0	0	0	7	C[C@H]1C[C@H](N(C1)C(=O)[C@@H](CCC2=CC=C(C=C2)O)NC(=O)[C@@H](CC3=CC=C(C=C3)O)O)C(=O)NC(CCCN=C(N)N)C=O
BGC0000503	Streptomyces	cinnamycin	1	2039.84	795.97	-10.0816	29	27	RiPP		1	0	0	0	21	C[C@H]1[C@@H]2C(=O)N[C@H](C(=O)N[C@H](C(=O)N[C@H]3CSC[C@@H]4C(=O)N[C@@H](CS1)C(=O)N[C@@H](CNCCCC[C@H](NC(=O)[C@@H]([C@@H](SC[C@@H](C(=O)N[C@H](C(=O)N[C@H](C(=O)N4)CCC(=O)N)CCCNC(=N)N)N)C)NC(=O)[C@@H](NC(=O)CNC(=O)[C@@H](NC3=O)[C@@H](C(=O)O)O)CC(=O)N)C(=O)O)C(=O)N[C@H](C(=O)NCC(=O)N5CCC[C@H]5C(=O)N[C@H](C(=O)N2)CC6=CC=CC=C6)CC7=CC=CC=C7)C(C)C)CC8=CC=CC=C8
BGC0000225	Streptomyces	frenolicin b	1	328.095	89.9	1.9508	6	1	Polyketide		1	0	0	0	22	[H][C@@]12CC(=O)O[C@]1([H])C1=C([C@@H](CCC)O2)C(=O)C2=C(O)C=CC=C2C1=O
BGC0000923	Pseudomonas	paerucumarin	1	203.022	75.03	1.75499	4	2	Other		0	0	0	0	5	OC1=C(O)C=C2C=C([N+]#[C-])C(=O)OC2=C1
BGC0000594	Planktothrix	microviridin k	1	-1					RiPP		0	0	0	0	8
BGC0000025	Streptomyces	avermectin	1	872.492	170.06	5.3774	14	3	Polyketide		1	0	0	0	9	CCC(C)[C@@H]1[C@H](C=C[C@@]2(O1)C[C@@H]3C[C@H](O2)C/C=C(/[C@H]([C@H](/C=C/C=C/4\CO[C@H]5[C@@]4([C@@H](C=C([C@H]5O)C)C(=O)O3)O)C)O[C@H]6C[C@@H]([C@H]([C@@H](O6)C)O[C@H]7C[C@@H]([C@H]([C@@H](O7)C)O)OC)OC)\C)C
BGC0001065	Streptomyces	herboxidiene	1	438.298	88.52	4.3629	5	2	Polyketide		1	0	0	0	96	COC(C(C)O)C(C)C1OC1(C)CC(C)\C=C\C=C(/C)[C@@H]1OC(CC(O)=O)CC[C@H]1C
BGC0000980	Aphanizomenon	cylindrospermopsin	1	415.116	177.18	-1.9049	9	5	NRP		0	0	0	0	3	C[C@H]1[C@H](C[C@@H]2C[C@@H](NC3=NC[C@H]1N23)[C@@H](C4=CC(=O)NC(=O)N4)O)OS(=O)(=O)O
BGC0000437	Pseudomonas	syringomycin	1	1224.59	522.86	-5.6353	19	18	NRP		0	0	0	0	17	CCCCCCCCC[C@@H](CC(=O)N[C@H]1COC(=O)[C@@H](NC(=O)[C@@H](NC(=O)/C(=C/C)/NC(=O)[C@@H](NC(=O)[C@@H](NC(=O)[C@@H](NC(=O)[C@H](NC(=O)[C@H](NC1=O)CO)CCN)CCN)CCCN=C(N)N)CC2=CC=CC=C2)[C@@H](C(=O)O)O)[C@@H](CCl)O)O
BGC0001678	Symbiodinium	mycosporine-like amino acids (maas)	1	-1					Other		3	0	0	0	1
BGC0001222	Lactobacillus	acidocin b	1	-1					RiPP		1	0	0	0	7
BGC0001101	Streptomyces	leinamycin	1	510.095	133.66	2.3768	9	3	NRP	Antibacterial,Cytotoxic,Inhibitor	1	1	0	0	71	C[C@@H]1C2=NC(=CS2)/C=C\C=C\C(=O)[C@@H](/C=C(/CC[C@@]3(CC(=O)N1)[C@@](C(=O)SS3=O)(C)O)\C)O
BGC0000963	Streptomyces	bleomycin	1	1414.52	627.07	-7.70358	31	20	NRP	Cytotoxic	1	0	0	0	32	CC1=C(N=C(N=C1N)C(CC(=O)N)NCC(C(=O)N)N)C(=O)NC(C(C2=CN=CN2)OC3C(C(C(C(O3)CO)O)O)OC4C(C(C(C(O4)CO)O)OC(=O)N)O)C(=O)NC(C)C(C(C)C(=O)NC(C(C)O)C(=O)NCCC5=NC(=CS5)C6=NC(=CS6)C(=O)NCCC[S+](C)C)O
BGC0000724	Streptomyces	streptomycin	1	581.266	336.43	-8.1611	15	12	Saccharide		1	1	0	0	27	C[C@H]1[C@@]([C@H]([C@@H](O1)O[C@@H]2[C@H]([C@@H]([C@H]([C@@H]([C@H]2O)O)N=C(N)N)O)N=C(N)N)O[C@H]3[C@H]([C@@H]([C@H]([C@@H](O3)CO)O)O)NC)(C=O)O
BGC0000488	Clostridium	circularin a	1	6771					RiPP	Antibacterial	1	1	0	0	12
BGC0001277	Fusarium	nivalenol	12	312.121	119.75	-1.8669	7	4	Terpene		2	0	0	0	22	CC1=C[C@@H]2[C@]([C@@H](C1=O)O)([C@]3([C@@H]([C@H]([C@H]([C@@]34CO4)O2)O)O)C)CO
BGC0001369	uncultured	metatricycloene	1	365.163	89.62	2.7091	3	2	Polyketide		3	0	0	0	31	NC(=O)\C=C\C=C\C1C=CC2C=CC3OC(\C=C\C=C\C=C\C(O)=O)C1C23
BGC0000170	Aspergillus	yanuthone d	1	502.257	130.5	4.1705	7	2	Polyketide		2	0	0	0	10	CC(C)=CCC\C(C)=C\CC\C(C)=C\CC12O[C@@H]1C(=O)C(COC(=O)CC(C)(O)CC(O)=O)=CC2=O
BGC0001771	Streptomyces	scleric acid	1	-1					NRP		1	0	0	0	17
BGC0001927	Streptomyces	a-94964	1	-1					Other		1	0	0	0	22
BGC0000197	Streptomyces	aranciamycin	1	544.158	189.28	0.3748	12	5	Polyketide	Antibacterial,Cytotoxic	1	1	0	0	23	CO[C@@H]1[C@H](O)[C@@H](O)[C@H](C)O[C@H]1O[C@H]1[C@H](OC)[C@](C)(O)C(=O)C2=CC3=C(C(O)=C12)C(=O)C1=C(C=CC=C1O)C3=O
BGC0001217	Streptomyces	preq0 base	1	-1					Other		1	0	0	0	3
BGC0000863	Pseudoalteromonas	eicosapentaenoic acid	1	302.225	37.3	5.9927	1	1	Other		0	0	0	0	4	CC/C=C\C/C=C\C/C=C\C/C=C\C/C=C\CCCC(=O)O
BGC0001125	Cylindrospermum	puwainaphycin a	4	1234.72	446.59	-2.2764	17	13	NRP		0	0	0	0	10	CCCCC(=O)CCCCCCCCC[C@H](C)[C@@H]1[C@H](C(=O)N[C@H](C(=O)N/C(=C/C)/C(=O)N[C@H](C(=O)N[C@H](C(=O)N[C@H](C(=O)NCC(=O)N[C@H](C(=O)N([C@H](C(=O)N2CCC[C@H]2C(=O)N1)CC(=O)N)C)[C@H](C)OC)CCC(=O)N)[C@H](C)O)[C@H](C)O)C(C)C)O
BGC0000918	Streptomyces	ochronotic pigment	1	-1					Other		1	0	0	0	4
BGC0001170	Clostridium	clostridiolysin s	1	-1					RiPP	Cytotoxic	1	0	0	0	9
BGC0000416	Xenorhabdus	rhabdopeptide 1	4	573.425	110.85	3.0862	5	3	NRP		0	0	0	0	3	CC(C)C[C@H](NC)C(=O)N(C)[C@@H](C(C)C)C(=O)N[C@@H](C(C)C)C(=O)N(C)[C@@H](C(C)C)C(=O)NCCc1ccccc1
BGC0000301	Planktothrix	anabaenopeptin 908	2	908.512	317.5	1.33107	10	12	NRP		0	0	0	0	5	CC[C@@H]([C@H]1C(NCCCC[C@@H](NC(N[C@H](C(O)=O)CCCNC(N)=N)=O)C(N[C@@H](C(C)C)C(N[C@@H](CCC2=CC=C(O)C=C2)C(N(C)[C@@H](CCC3=CC=C(O)C=C3)C(N1)=O)=O)=O)=O)=O)C
BGC0000672	Oryza	phytocassane	2	316.204	54.37	3.3262	3	1	Terpene		3	0	0	0	11	C[C@@H]1[C@@H]2CC[C@@H]3[C@@]([C@H]2C(=O)C=C1C=C)(C[C@@H](C(=O)C3(C)C)O)C
BGC0000786	Edwardsiella	o-antigen	1	-1					Saccharide		0	0	0	0	10
BGC0000568	Escherichia	microcin b17	1	-1					RiPP		0	0	0	0	7
BGC0001721	Burkholderia	ornibactin	1	-1					NRP		0	0	0	1	15
BGC0000303	Streptomyces	anthramycin	1	315.122	115.89	0.58442	5	4	NRP		1	1	0	0	25	CC1=C(O)C2=C(C=C1)C(=O)N1C=C(CC1C(O)N2)\C=C\C(N)=O
BGC0001433	Streptomyces	argimycin pi	7	330.104	79.29	2.7181	4	2	Polyketide		1	0	0	0	37	O=C(O)[C@@H](NC(C)=O)CS/C(C)=C([H])/C([H])=C1C=CC2=C\1C=CC=N2
BGC0000188	Cylindrospermopsis	saxitoxin	5	299.134	184.81	-3.852	10	6	Alkaloid	Neurotoxic	0	0	0	0	34	C1CN2C(=N[C@H]([C@H]3[C@]2(C1(O)O)N=C(N3)N)COC(=O)N)N
BGC0000534	Streptococcus	mutacin k8	1	-1					RiPP		1	0	0	0	7
BGC0000400	Paenibacillus	paenibacterin	1	1604.1	540.35	0.6121	21	18	NRP		1	0	0	0	5	CCCCCCCCCCCCCCC(=O)N[C@@H](CCCN)C(=O)N[C@@H](C(C)C)C(=O)N[C@H]1[C@H](OC(=O)[C@@H](NC(=O)[C@@H](NC(=O)[C@@H](NC(=O)[C@@H]2CCCN2C(=O)[C@@H](NC(=O)[C@@H](NC(=O)[C@@H](NC(=O)[C@@H](NC(=O)[C@@H](NC(=O)[C@@H](NC1=O)CCCN)CO)C(C)C)CCCCN)CO)[C@@H](C)CC)C(C)C)CCCCN)[C@@H](C)CC)C
BGC0000459	Streptomyces	griseoviridin	2	477.157	150.99	0.6221	9	4	NRP	Antibacterial	1	1	0	0	36	[H][C@@]12CS\C(=C/C[C@@H](C)OC1=O)C(=O)NC\C=C\C=C\[C@@H](O)C[C@H](O)CC1=NC(=CO1)C(=O)N2
BGC0001772	Anabaena	scytophycin	1	849.524	172.05	4.9958	13	2	Polyketide		0	0	0	0	18	C[C@H]1[C@@H](C[C@@H]([C@]2(CO2)[C@H](C[C@@H]3CC=C[C@H](O3)C[C@H]([C@H](/C=C(/C=C/C(=O)O[C@@H]1[C@@H](C)[C@H]([C@@H](C)CCC(=O)[C@H](C)[C@@H]([C@H](C)/C=C/N(C)C=O)OC)O)\C)O)OC)OC)OC)OC
BGC0002011	Amycolatopsis	ansacarbamitocin a	1	-1					Polyketide		1	0	0	0	75
BGC0001923	Acremonium	ascochlorin	1	-1					Terpene		2	0	0	0	8
BGC0000461	Lysobacter	wap-8294a2	1	1561.81	609.92	-5.0208	22	19	NRP		0	0	0	0	10	CC(C)CCCC1CC(=O)NC(CO)C(=O)NC(C(O)C(N)=O)C(=O)NC(CO)C(=O)NCC(=O)N(C)C(CC2=CC=CC=C2)C(=O)NC(CC(C)C)C(=O)NC(CCCN)C(=O)NC(CCC(O)=O)C(=O)NC(CC(N)=O)C(=O)NC(CC2=CNC3=C2C=CC=C3)C(=O)NC(CCCN)C(=O)N(C)C(C(C)C)C(=O)O1
BGC0000259	Serratia	prodigiosin	1	323.2	53.17	2.97012	2	2	Polyketide		0	0	0	0	16	CCCCCC1=C(NC(=C1)/C=C\2/C(=C/C(=C/3\C=CC=N3)/N2)OC)C
BGC0000643	Brevundimonas	carotenoid	1	738.674	99.38	11.5564	6	4	Terpene		0	0	0	0	10	C[C@H](CCCCC(C)CCC[C@@H](C)CCCC(C)CCC=C(C)C)CCC[C@H](C)CCC[C@H](C)CCCC(C)(C)O[C@@H]1[C@@H]([C@H]([C@@H]([C@H](O1)CO)O)O)O
BGC0001803	Streptomyces	thioviridamide	1	1345.52	330.19	0.8849	18	14	RiPP		1	0	0	0	19	CCC(C)C1NC(=O)C(CS\C=C/NC(=O)C(NC(=O)C(CC(C)C)NC(=O)C(C)NC1=O)C(O)C1=CN(C)C=[N+]1C)NC(=O)C(C)NC(=S)C(C)NC(=S)C(C)NC(=S)C(C)NC(=S)C(CCSC)NC(=S)C(NC(=O)C(C)(O)CC(C)=O)C(C)C
BGC0000451	Teredinibacter	turnerbactin	1	-1					NRP		0	0	0	1	13
BGC0001165	Lyngbya	curacin a	1	373.244	21.59	6.3665	3	0	NRP	anti-tubulin	0	0	0	0	14	C[C@H]1CC1C2=N[C@@H](CS2)/C=C\CC/C=C/C=C(\C)/CC[C@H](CC=C)OC
BGC0001915	Phoma	betaestacin i	2	-1					Terpene		2	0	0	0	4
BGC0001418	Hyalangium	myxochromide d	1	736.416	206.1	2.3527	8	5	NRP		0	0	0	0	20	C1(=O)N[C@@H](CC(C)C)C(=O)N[C@@H](C)C(=O)N[C@@H](CCC(=O)N)C(=O)O[C@H](C)[C@H](N(C)C(=O)/C=C/C=C/C=C/C=C/C=C/C=C/C=C/CC)C(=O)N[C@@H]1C
BGC0001117	Streptomyces	himastatin	1	1484.76	477.94	-2.396	24	16	NRP		1	0	0	0	25	[H][C@@]12NC3=CC=C(C=C3[C@]1(O)C[C@@H]1N2C(=O)[C@H](NC(=O)[C@H](CC(C)C)NC(=O)[C@H]2C[C@@H](O)CNN2C(=O)[C@@H](OC(=O)[C@H](NC1=O)C(C)C)C(C)C)[C@H](C)O)C1=CC=C2N[C@@]3([H])N4[C@@H](C[C@@]3(O)C2=C1)C(=O)N[C@H](C(C)C)C(=O)O[C@@H](C(C)C)C(=O)N1NC[C@H](O)C[C@@H]1C(=O)N[C@@H](CC(C)C)C(=O)N[C@H]([C@H](C)O)C4=O
BGC0000352	Acinetobacter	fimsbactin a	1	574.191	227.55	0.1303	12	7	NRP	Siderophore	0	0	0	1	17	CC(=O)N(O)CCCCNC(=O)[C@H](COC(=O)C1=C(O)C(O)=CC=C1)NC(=O)[C@@H]1COC(=N1)C1=C(O)C(O)=CC=C1
BGC0000335	Cystobacter	cystomanamide a	4	608.317	277.26	-1.6955	9	9	NRP		0	0	0	0	10	CC(C)CCCCC[C@@H](N)CC(=O)N[C@H](CC(N)=O)C(=O)N[C@@H]([C@@H](O)C(N)=O)C(=O)N[C@H]([C@@H](O)C1=CC=CC=C1)C(O)=O
BGC0000766	Lactobacillus	exopolysaccharide	1	-1					Saccharide		1	0	0	0	29
BGC0000871	Myxococcus	vepe	3	646.482	120.14	9.3929	8	1	Other		0	0	0	0	5	NCCOP([O-])(OCC(OC(CCCCCCCCCCCC(C)C)=O)CO/C=C\CCCCCCCCCCC(C)C)=O
BGC0000716	Streptomyces	spectinomycin	1	332.158	129.51	-2.9256	9	5	Saccharide		1	0	0	0	22	C[C@@H]1CC(=O)[C@]2([C@@H](O1)O[C@@H]3[C@H]([C@@H]([C@@H]([C@@H]([C@H]3O2)NC)O)NC)O)O
BGC0001808	Streptomyces	toyocamycin	1	291.097	150.44	-1.50332	9	4	Other		1	0	0	0	10	NC1=NC=NC2=C1C(=CN2[C@@H]1O[C@H](CO)[C@@H](O)[C@H]1O)C#N
BGC0001394	Myxococcus	phenalamide a2	1	491.34	69.56	6.2568	3	3	NRP		0	0	0	0	12	C[C@@H](CO)NC(=O)C(\C)=C\C=C\C=C\C=C\C(\C)=C\[C@@H](C)[C@@H](O)C(\C)=C\[C@@H](C)CCC1=CC=CC=C1
BGC0000412	Pseudomonas	pyochelin	1	324.06	73.13	1.7121	6	2	NRP		0	0	0	1	5	[H][C@@]1(CSC(=N1)C1=CC=CC=C1O)[C@@]1([H])SC[C@H](N1C)C(O)=O
BGC0001662	Kitasatospora	mediomycin a	1	1175.64	366.52	5.7471	17	14	Polyketide		1	0	0	0	32	CC(\C=C\CC\C=C\C=C\C=C(/C)C(O)=O)[C@@H](O)[C@H](C)[C@@H](O)\C=C\C=C\C=C\C=C\C=C\C=C\CC(OS(O)(=O)=O)C(C)C(=O)C[C@H](O)C[C@H](O)\C=C\C[C@H](O)C[C@H](O)C[C@@H](O)\C=C\C[C@H](O)C[C@@H](O)\C=C\C[C@H](O)C[C@H](O)CCCN
BGC0001996	Aspergillus	oryzine a	2	-1					Other		2	0	0	0	16
BGC0000403	Paenibacillus	pelgipeptin	1	-1					NRP		1	0	0	0	8
BGC0000513	Saccharopolyspora	ery-9	7	2860.31					RiPP		1	0	0	0	4
BGC0000993	Chromobacterium	fr901228	1	540.208	142.7	1.4296	8	4	NRP		0	0	0	0	21	C\C=C1/NC(=O)[C@H]2CSSCC\C=C\[C@H](CC(=O)N[C@H](C(C)C)C(=O)N2)OC(=O)[C@@H](NC1=O)C(C)C
BGC0001079	Streptomyces	napyradiomycin a80915c	1	546.134	104.06	5.49262	6	3	Polyketide	Antibacterial	1	1	0	0	31	O=C1C2(Cl)C(OC(C)(C)C(Cl)C2)(CC3C(C)(C)C(Cl)CCC3(O)C)C(C4=CC(O)=C(C)C(O)=C41)=O
BGC0001551	Streptomyces	citrulassin e	1	-1					RiPP		1	0	0	0	3
BGC0002007	Amycolatopsis	atolypene a	2	-1					Terpene		1	0	0	0	17
BGC0001333	uncultured	be-54017	1	451.093	96.93	2.3069	7	2	Alkaloid	Cytotoxic	3	0	0	0	14	COC1=C2N(C3=CC=CC=C13)[C@]1(O)C(=O)N(C)C(=O)[C@]1(O)C1=C2N(C)C2=CC=C(Cl)C=C12
BGC0001552	Streptomyces	citrulassin f	1	-1					RiPP		1	0	0	0	4
BGC0001457	Streptomyces	jomthonic acid a	3	387.205	92.7	3.4497	4	2	NRP		1	0	0	0	37	C\C=C(/C)\C=C\C(=O)N[C@@H]([C@H](C)C1=CC=CC=C1)C(=O)O[C@H](C)[C@@H](C)C(O)=O
BGC0002036	Streptomyces	dehydrofosmidomycin	1	-1					Other		1	0	0	0	13
BGC0001261	Alternaria	am-toxin	1	431.206	122.83	0.8286	6	3	NRP		2	0	0	0	1	CC1C(=O)OC(C(=O)NC(C(=O)NC(=C)C(=O)N1)CCC2=CC=C(C=C2)OC)C(C)C
BGC0000625	Streptomyces	thioviridamide	1	1345.52	330.19	0.8849	18	14	RiPP		1	0	0	0	19	CCC(C)C1NC(=O)C(CS\C=C/NC(=O)C(NC(=O)C(CC(C)C)NC(=O)C(C)NC1=O)C(O)C1=CN(C)C=[N+]1C)NC(=O)C(C)NC(=S)C(C)NC(=S)C(C)NC(=S)C(C)NC(=S)C(CCSC)NC(=S)C(NC(=O)C(C)(O)CC(C)=O)C(C)C
BGC0001193	Saccharothrix	thiolutin	1	228.003	51.1	1.5715	5	1	NRP		1	0	0	0	25	CN1C(=O)C(NC(C)=O)=C2SSC=C12
BGC0000589	Escherichia	microcin m	1	-1					RiPP		0	0	0	0	11
BGC0000487	Carnobacterium	carnocyclin	1	-1					RiPP		1	0	0	0	15
BGC0000271	Streptomyces	spore pigment	1	-1					Polyketide		1	0	0	0	12
BGC0000562	Kocuria	variacin	1	-1					RiPP		1	0	0	0	1
BGC0000011	Aspergillus	sterigmatocystin	1	324.063	78.13	3.0064	6	1	Polyketide		2	0	0	0	26	[H][C@]12OC=C[C@@]1([H])C1=C(O2)C=C(OC)C2=C1OC1=C(C(O)=CC=C1)C2=O
BGC0000070	Penicillium	griseofulvin	6	352.071	71.06	2.8103	6	0	Polyketide	Antifungal,Cytotoxic	2	0	1	0	21	COC1=CC(OC)=C(Cl)C2=C1C(=O)C1(O2)[C@H](C)CC(=O)C=C1OC
BGC0001611	Streptomyces	guangnanmycin	1	-1					NRP		1	0	0	0	28
BGC0000485	Lactobacillus	acidocin b	1	-1					RiPP		1	0	0	0	3
BGC0000794	Geobacillus	s-layer glycan	1	-1					Saccharide		1	0	0	0	15
BGC0001089	Bacillus	bacillaene	1	582.367	135.96	5.4551	5	5	Polyketide	Antibacterial	1	1	0	0	14	CC(C)CC(C(=O)NCCC/C=C\C=C\C(=C\C=C/C=C(/C)\C(CC(=O)N/C(=C\C=C\C=C\C(C)C(=O)O)/C)O)\C)O
BGC0000653	Streptomyces	pentalenolactone	1	276.1	76.13	1.1516	4	1	Terpene		1	0	0	0	17	[H][C@@]12COC(=O)[C@]3(CO3)[C@@]11C=C(C)[C@@H](C)[C@@]1([H])C=C2C(O)=O
BGC0001051	Sorangium	thuggacin a	1	631.354	140.34	5.7715	9	5	NRP	Antibacterial	0	1	0	0	19	CCCCCC\C1=C/C2=CSC(=N2)C(C)C(O)CC(O)\C=C\C=C/CC(OC1=O)C(O)C(O)C(C)C(O)C(\C)=C\C(\C)=C\C
BGC0000508	Staphylococcus	epidermin	1	2163.95	743.69	-6.0239	30	25	RiPP		1	0	0	0	8	CCC(C)C1C(=O)NC(CSCC(C(=O)NC(C(=O)NC(C(=O)N1)CC2=CC=CC=C2)CCCCN)NC(=O)C(C)NC(=O)C(C(C)CC)N)C(=O)NC3C(SCC(NC(=O)CNC(=O)C4CCCN4C3=O)C(=O)NC(C)C(=O)NC(CCCCN)C(=O)N/C(=C\C)/C(=O)NCC(=O)NC5CSCC6C(=O)N/C=C\SCC(C(=O)NC(C(=O)N6)CC7=CC=C(C=C7)O)NC(=O)C(NC(=O)C(NC5=O)CC8=CC=CC=C8)CC(=O)N)C
BGC0000433	Bacillus	surfactin	1	1021.67	304.6	4.7963	11	9	NRP	Surfactant	1	0	0	0	23	[H][C@@]1(CCC(O)=O)NC(=O)CC(CCCCCCCCCCC)OC(=O)[C@]([H])(CC(C)C)NC(=O)[C@@]([H])(CC(C)C)NC(=O)[C@]([H])(CC(O)=O)NC(=O)[C@@]([H])(NC(=O)[C@@]([H])(CC(C)C)NC(=O)[C@]([H])(CC(C)C)NC1=O)C(C)C
BGC0000720	Streptoalloteichus	tobramycin	1	467.259	268.17	-6.2958	14	10	Saccharide		1	1	0	0	10	C1[C@@H]([C@H]([C@@H]([C@H]([C@@H]1N)O[C@@H]2[C@@H]([C@H]([C@@H]([C@H](O2)CO)O)N)O)O)O[C@@H]3[C@@H](C[C@@H]([C@H](O3)CN)O)N)N
BGC0000124	Streptomyces	piericidin a1	1	415.272	71.81	5.45742	5	2	Polyketide		1	0	0	0	12	COC1=C(OC)C(O)=C(C)C(C\C=C(/C)C\C=C\C(\C)=C\[C@@H](C)[C@@H](O)C(\C)=C\C)=N1
BGC0001529	Streptomyces	bezastatin derivates	1	-1					Alkaloid		1	0	0	0	10
BGC0000203	Amycolatopsis	be-7585a	1	842.23	340.12	-4.2203	21	12	Polyketide		1	0	0	0	42	C[C@H]1[C@H](CC[C@@H](O1)OC23C(=O)C(C(CC2(C(=CC4=C3C(=O)C5=C(C4=O)C(=CC=C5)O)S[C@@H]6[C@H]([C@@H]([C@H](O[C@@H]6O[C@@H]7[C@@H]([C@H]([C@@H]([C@H](O7)CO)O)O)O)CO)O)O)O)(C)O)O)O
BGC0000132	Streptomyces	pyrrolomycin	1	179.949	58.93	2.2297	2	1	Polyketide		1	1	0	0	11	C1=C(C(=C(N1)Cl)Cl)[N+](=O)[O-]
BGC0001699	Aspergillus	nidulanin a	1	-1					Polyketide		2	0	0	0	4
BGC0000340	Streptomyces	echoside a	5	468.142	145.91	1.7912	9	5	NRP		1	0	0	0	17	COC(=O)[C@H]1O[C@@H](OC2=C(C=C(O)C(=C2O)C2=CC=CC=C2)C2=CC=CC=C2)[C@H](O)[C@@H](O)[C@@H]1O
BGC0001922	Streptomyces	isoindolinomycin	1	-1					Polyketide		1	0	0	0	39
BGC0001161	Moorea	1-heptadecene	1	238.266	0	6.6537	0	0	Polyketide		0	0	0	0	2	CCCCCCCCCCCCCCCC=C
BGC0000493	Leuconostoc	leucocyclicin q	1	-1					RiPP		1	0	0	0	1
BGC0000033	Micromonospora	calicheamicin	1	1367.27	308.44	3.19682	27	8	Polyketide		1	0	0	0	74	CCN[C@H]1CO[C@H](C[C@@H]1OC)O[C@@H]2[C@H]([C@@H]([C@H](OC2O[C@H]3C#C/C=C\C#C[C@]\4(CC(=O)C(=C3/C4=C\CSSSC)NC(=O)OC)O)C)NO[C@H]5C[C@@H]([C@@H]([C@H](O5)C)SC(=O)C6=C(C(=C(C(=C6OC)OC)O[C@H]7[C@@H]([C@@H]([C@H]([C@@H](O7)C)O)OC)O)I)C)O)O
BGC0000607	Macrococcus	micrococcin p1	1	1143.21	325.52	5.568	22	9	RiPP		1	0	0	0	24	C/C=C/1\C2=NC(=CS2)C(=O)NC(C3=NC(=CS3)C(=O)NC(C4=NC(=CS4)C5=C(C=CC(=N5)C6=NC(=CS6)C7=NC(=CS7)C(=O)N/C(=C/C)/C(=O)NCC(C)O)C8=NC(=CS8)C(=O)NC(C(=O)N1)C(C)O)C(C)O)C(C)C
BGC0000650	Algoriphagus	carotenoid	1	771.347	214.14	2.941	15	6	Terpene		0	0	0	0	7	CC[C@]1(CCC2=C(C3=C(C(=C2[C@H]1O[C@H]4C[C@@H]([C@@H]([C@@H](O4)C)O[C@H]5C[C@@H]([C@@H]([C@@H](O5)C)O[C@H]6CC[C@@H]([C@@H](O6)C)O)O)N(C)C)O)C(=O)C7=C(C3=O)C(=CC=C7)O)O)O
BGC0000862	Shewanella	eicosapentaenoic acid	1	302.225	37.3	5.9927	1	1	Other		0	0	0	0	9	CC/C=C\C/C=C\C/C=C\C/C=C\C/C=C\CCCC(=O)O
BGC0001447	Saccharomonospora	primycin	1	1077.73	369.65	2.45717	18	16	Polyketide		1	0	0	0	37	CCCCC1C(O)C(C)CCC(O)CCCC(O)CCCC(O)C(C)=CC(O[C@H]2O[C@H](CO)[C@@H](O)[C@@H]2O)C(O)CC(O)CC(O)CC(O)CC(O)CCCCC(C)=CC(C)C(OC1=O)C(C)C(O)CCCNC(N)=N
BGC0000313	Beauveria	beauvericin	1	783.409	139.83	4.9125	9	0	NRP		2	0	0	0	10	CC(C)C1OC(=O)C(CC2=CC=CC=C2)N(C)C(=O)C(OC(=O)C(CC2=CC=CC=C2)N(C)C(=O)C(OC(=O)C(CC2=CC=CC=C2)N(C)C1=O)C(C)C)C(C)C
BGC0000180	Legionella	legioliulin	1	290.094	50.44	4.2252	3	1	Polyketide	fluorescence	0	0	0	0	8	OC1=C2C(=O)OC(\C=C\C=C\C3=CC=CC=C3)=CC2=CC=C1
BGC0000649	Streptomyces	carotenoid	1	738.674	99.38	11.5564	6	4	Terpene		1	0	0	0	8	C[C@H](CCCCC(C)CCC[C@@H](C)CCCC(C)CCC=C(C)C)CCC[C@H](C)CCC[C@H](C)CCCC(C)(C)O[C@@H]1[C@@H]([C@H]([C@@H]([C@H](O1)CO)O)O)O
BGC0000060	Streptomyces	fostriecin	1	430.139	153.75	1.0551	7	5	Polyketide		1	0	0	0	21	C[C@@](/C=C/[C@@H]1CC=CC(=O)O1)([C@@H](C[C@H](/C=C\C=C/C=C/CO)O)OP(=O)(O)O)O
BGC0000228	Streptomyces	granaticin	1	444.106	159.82	0.5042	10	4	Polyketide		1	0	0	0	6	C[C@@H]1[C@@]2([C@@H](C[C@H](O1)C3=C2C(=O)C4=C(C3=O)C(=C5[C@H]6[C@H](CC(=O)O6)OC(C5=C4O)C)O)O)O
BGC0001521	Herpetosiphon	auriculamide	1	341.139	86.63	2.459	4	3	NRP		1	0	0	0	21	CC[C@H](C)[C@H](O)C(=O)N[C@@H](CC1=CC(Cl)=C(O)C=C1)C(=O)CC
BGC0000431	Streptomyces	stenothricin	1	-1					NRP	Antibacterial	1	1	0	0	22
BGC0000747	Streptococcus	capsular polysaccharide	1	1322.45	660.55	-16.7828	38	25	Saccharide		1	0	0	0	7	CC(=O)N[C@@H]1[C@H](C[C@@](O[C@H]1[C@@H]([C@@H](CO)O)O)(C(=O)O)O[C@H]2[C@H]([C@H](O[C@H]([C@@H]2O)O[C@@H]3[C@H](O[C@@H]([C@@H]([C@H]3O)NC(=O)C)OC[C@@H]4[C@H]([C@@H]([C@H]([C@H](O4)O[C@H]5[C@H](O[C@H]([C@@H]([C@H]5O[C@H]6[C@@H]([C@H]([C@@H]([C@H](O6)CO)O)O)O)O)O[C@@H]7[C@H](O[C@H]([C@@H]([C@H]7O)O)O)CO)CO)O)O)O)CO)CO)O)O
BGC0000934	Kitasatospora	5-acetyl-5,10-dihydrophenazine-1-carboxylic acid	5	268.085	69.64	3.1264	3	2	Other	Antibacterial	1	1	0	0	23	CC(=O)N1C2=CC=CC=C2NC2=C1C=CC=C2C(O)=O
BGC0001157	Streptomyces	bottromycin a2	1	822.446	200.29	3.4771	11	5	RiPP	Antibacterial	1	1	0	0	13	CC1CCN2C1C(=O)NC(C(=O)NC(C(=NCC2=O)NC(C(=O)NC(C(C)C3=CC=CC=C3)C(=O)NC(CC(=O)OC)C4=NC=CS4)C(C)(C)C)C(C)(C)C)C(C)C
BGC0000529	Microbispora	microbisporicin a2	1	2230.77	777.08	-9.5433	32	26	RiPP	Antibacterial	1	1	0	0	20	O=C(N[C@H](C(NC(C(N[C@H](C(N[C@H](C(N[C@H]([C@H](C)SC[C@@H](C(N[C@H]([C@H](O)C)C(N[C@@H](C(N1[C@H]2[C@@H](O)CC1)=O)CSC[C@H](NC([C@H](CC(N)=O)NC([C@H](NC(CNC(CNC(CNC2=O)=O)=O)=O)CSC[C@@H](C(N/C=C\SC3)=O)NC4=O)=O)=O)C(N[C@@H]3C(N[C@@H]4CC5=CC=CC=C5)=O)=O)=O)=O)NC6=O)C(N7[C@H](C(NC6)=O)CCC7)=O)=O)CSC8)=O)CC(C)C)=O)=C)=O)CC9=CNC%10=C9C=C(Cl)C=C%10)[C@@H]8NC(/C(NC([C@H](C(C)C)N)=O)=C/C)=O
BGC0001525	Synechocystis	bartoloside 2	3	834.482	169.3	8.2842	10	7	Other		0	0	0	0	11	CCCCCCCCCC(Cl)CCCCCc2cc(OC1O[C@H](C)[C@@H](O)[C@H](O)[C@@H]1O)c(CCCCCC(Cl)CCCCCC)c(O)c2C3OC[C@H](O)[C@@H](O)[C@@H]3O
BGC0000765	Lactobacillus	exopolysaccharide	1	-1					Saccharide		1	0	0	0	15
BGC0000234	Streptomyces	jadomycin	1	419.137	104.14	3.48222	7	2	Polyketide		1	0	0	0	7	[H][C@@]12OC(=O)[C@]([H])(C(C)CC)N1C1=C(C(=O)C3=CC=CC(O)=C3C1=O)C1=C(O)C=C(C)C=C21
BGC0000219	Streptomyces	elloramycin	1	660.205	202.81	0.98332	15	3	Polyketide	Cytotoxic	1	0	0	0	25	C[C@H]1[C@H]([C@@H]([C@H](O[C@@H]1OC2=CC3=CC4=C(C(=C3C(=C2C(=O)OC)C)O)C(=O)[C@@]5(C(=O)C=C([C@H]([C@@]5(C4=O)O)O)OC)OC)OC)OC)OC
BGC0000031	Streptomyces	borrelidin	1	489.309	127.85	4.63558	6	3	Polyketide	Antibacterial,Cytotoxic	1	1	0	0	43	[H][C@]1(CCC[C@H]1C(O)=O)[C@]1([H])C\C=C\C=C(C#N)/[C@H](O)[C@@H](C)C[C@H](C)C[C@H](C)C[C@H](C)[C@@H](O)CC(=O)O1
BGC0000200	uncultured	arixanthomycin a	3	719.221	203.89	3.1951	13	4	Polyketide	Cytotoxic	3	0	0	0	35	O=C(C1=CC=CC(O[C@H]2[C@H](OC)[C@@H](OC)[C@H](OC)[C@@H](C)O2)=C1O3)C4=C3C(O)=C(CCC5=C6C(O)=C7C(C[C@@](C)(OC[C@]8([H])C(O)=O)N8C7=O)=C5)C6=C4O
BGC0001050	Tistrella	thalassospiramide a	1	957.542	302.13	0.4038	13	10	NRP	Inhibitor	0	0	0	0	2	CCCCCC\C=C/CC(=O)N[C@@H](CO)C(=O)N[C@@H](C(C)C)C(=O)N[C@@H](CO)[C@@H](O)CC(=O)N[C@@H](C(C)C)C(=O)N[C@H]1COC(=O)[C@H](CC2=CC=C(O)C=C2)N(C)C(=O)[C@@H](NC(=O)\C=C\1)C(C)C
BGC0000811	Aspergillus	fumigaclavine c	1	366.231	45.33	4.153	3	1	Alkaloid		2	0	0	0	11	C[C@H]1CN(C)[C@@H]2CC3=C(NC4=CC=CC([C@H]2[C@H]1OC(C)=O)=C34)C(C)(C)C=C
BGC0000956	Pantoea	andrimid	1	479.242	121.44	2.5411	5	3	NRP	Antibacterial	0	1	0	0	21	C\C=C\C=C\C=C\C(=O)N[C@@H](CC(=O)N[C@@H](C(C)C)C(=O)[C@H]1[C@H](C)C(=O)NC1=O)C1=CC=CC=C1
BGC0001827	Sarocladium	xenovulene a	1	358.214	55.76	4.4777	4	1	Polyketide		2	0	0	0	14	[H][C@]12CO[C@]3([H])[C@@]1([H])C(O[C@]1(C)C\C=C\C(C)(C)C\C=C(C)\CC[C@@]31[H])=C(O)C2=O
BGC0001199	Streptomyces	akaeolide	1	392.22	89.9	2.7573	6	1	Polyketide		1	0	0	0	25	CCC[C@@H]1[C@H]2CC(=O)/C(=C/[C@H]([C@H]3[C@H](C[C@@](O3)(CC[C@H](C1=O)C(=O)O2)C)C)O)/C
BGC0001328	Micromonospora	rakicidin a	2	606.399	168.13	3.1066	7	4	NRP	Cytotoxic	1	0	0	0	15	CN(CC(N[C@@H]([C@@H](C(N)=O)O)C(OC([C@H](C)CCCCCCCCCCCC(C)C)[C@H](C)C(N1)=O)=O)=O)C(/C=C/C1=C)=O
BGC0000264	Streptomyces	resistomycin	2	376.095	115.06	3.65592	6	4	Polyketide	Antibacterial,Inhibitor,A modulator of apoptosis	1	1	0	0	18	CC1=CC(=C2C3=C4C(=CC(=C13)O)C(C(=O)C5=C(C=C(C(=C45)C2=O)O)O)(C)C)O
BGC0000263	Streptomyces	ravidomycin	1	563.216	127.9	4.1478	10	2	Polyketide		1	0	0	0	35	C[C@@H]1[C@@H]([C@@H]([C@H](C(O1)C2=C3C(=C(C=C2)O)C(=CC4=C3OC(=O)C5=CC(=CC(=C54)OC)C=C)OC)O)N(C)C)OC(=O)C
BGC0001747	Tannerella	pseudaminic acid	1	333.13	168.25	-4.0351	8	5	Other		0	0	0	0	9	C[C@@H]([C@@H]([C@H]1[C@H]([C@H](C[C@](O1)(C(=O)[O-])O)O)NC(=O)C)NC(=O)C)O
BGC0001241	Claviceps	ergotamine	1	581.264	118.21	1.9908	6	3	Terpene		2	0	0	0	13	C[C@@]1(C(=O)N2[C@H](C(=O)N3CCC[C@H]3[C@@]2(O1)O)CC4=CC=CC=C4)NC(=O)[C@H]5CN([C@@H]6CC7=CNC8=CC=CC(=C78)C6=C5)C
BGC0001890	Vibrio	amphi-enterobactin 1	4	-1					NRP		0	0	0	0	24
BGC0000401	Paenibacillus	paenibactin	1	-1					NRP		1	0	0	1	6
BGC0001561	Streptomyces	curacomycin	1	789.394	279.73	-0.3805	9	10	NRP		1	0	0	0	13	CC[C@H](C)[C@@H]3NC(=O)[C@@H](CC(C)C)NC(=O)[C@@H](C(C)C)NC(=O)[C@H](Cc1c[nH]c2ccc(Cl)cc12)NC(=O)C(C(O)C(N)=O)NC(=O)[C@H](CCCN)NC3=O
BGC0000473	Microcystis	microcyclamide	1	582.183	156.93	3.66492	11	3	RiPP		0	0	0	0	9	CC[C@H](C)[C@@H]1NC(=O)C2=C(C)OC(=N2)[C@H](C)NC(=O)C2=CSC(=N2)[C@H](CC2=CN=CN2C)NC(=O)C2=CSC1=N2
BGC0001604	Fusarium	gibberellin	1	346.142	104.06	1.0271	5	3	Terpene		2	0	0	0	7	CC12[C@H](C=C[C@@]3([C@@H]1[C@@H]([C@]45[C@H]3CC[C@](C4)(C(=C)C5)O)C(=O)O)OC2=O)O
BGC0001109	unidentified	pederin	1	503.309	124.94	1.3759	9	3	NRP		3	0	0	0	9	C[C@H]1[C@H](O[C@](CC1=C)([C@@H](C(=O)N[C@H]([C@@H]2C[C@H](C([C@H](O2)C[C@@H](COC)OC)(C)C)O)OC)O)OC)C
BGC0001693	Micromonospora	nenestatin	1	-1					Polyketide		1	0	0	0	60
BGC0000044	Stigmatella	dawenol	1	426.313	46.53	7.0448	3	1	Polyketide		0	0	0	0	9	C\C=C/C(/C)=C/C=C/C(/C)=C/C=C/C(/C)=C/C(C)\C=C(/C)C(O)C(C)C(C)OC(C)=O
BGC0001196	Streptomyces	desotamide	1	696.396	233.48	0.2779	7	8	NRP		1	0	0	0	22	CC[C@@H](C)[C@H]1C(=O)N[C@H](C(=O)NCC(=O)N[C@H](C(=O)N[C@H](C(=O)N[C@@H](C(=O)N1)CC(C)C)CC(C)C)CC2=CNC3=CC=CC=C32)CC(=O)N
BGC0000687	Diaporthe	phyllocladan-16α-ol	1	290.261	20.23	5.1702	1	1	Terpene		2	0	0	0	7	C[C@]12CCCC([C@@H]1CC[C@]34[C@@H]2CCC(C3)[C@](C4)(C)O)(C)C
BGC0000825	Streptomyces	staurosporine	1	466.2	69.45	4.354	6	2	Alkaloid		1	0	0	0	15	CNC1CC2OC(C)(C1OC)N1C3=CC=CC=C3C3=C4CNC(=O)C4=C4C5=C(C=CC=C5)N2C4=C13
BGC0000311	Amycolatopsis	balhimycin	1	1445.41	527.33	0.3144	25	18	NRP		1	0	0	0	37	CNC(CC(C)C)C(=O)NC1C(O)C2=CC=C(OC3=C(OC4O[C@H](CO)C(O)[C@H](O)C4O)C4=CC(=C3)C(NC(=O)C(CC(N)=O)NC1=O)C(=O)NC1C3=CC(=C(O)C=C3)C3=C(O)C=C(O)C=C3C(NC(=O)C(NC1=O)C(OC1C[C@](C)(N)C(=O)C(C)O1)C1=CC=C(O4)C(Cl)=C1)C(O)=O)C(Cl)=C2
BGC0001760	Streptomyces	rimosamide	1	-1					NRP		1	0	0	0	14
BGC0000645	Halobacillus	carotenoid	1	738.674	99.38	11.5564	6	4	Terpene		1	0	0	0	6	C[C@H](CCCCC(C)CCC[C@@H](C)CCCC(C)CCC=C(C)C)CCC[C@H](C)CCC[C@H](C)CCCC(C)(C)O[C@@H]1[C@@H]([C@H]([C@@H]([C@H](O1)CO)O)O)O
BGC0001195	Nocardiopsis	nocardiopsin a	4	573.367	110.21	5.255	7	1	NRP		1	0	0	0	19	CCC(=O)CC(C1(CC(C2CCC(O2)CC/C=C(\C(=O)C(CC/C=C/C(=O)N3CCCC[C@H]3C(=O)O1)C)/C)C)C)O
BGC0001061	Streptomyces	polyketomycin	1	864.284	279.18	2.52406	18	6	Polyketide	Antibacterial,Cytotoxic	1	1	0	0	43	COC1=CC(=O)C2=C(C(C)=C3CC4(O)C(O[C@H]5CC[C@H](O[C@H]6C[C@@](C)(O)[C@H](OC(=O)C7=C(C)C=CC(C)=C7O)[C@H](C)O6)[C@@H](C)O5)C(=O)\C(=C(\C)O)C(=O)C4(O)C(=O)C3=C2O)C1=O
BGC0001774	Streptomyces	spicamycin	1	621.385	214.84	1.5029	11	8	Other		1	0	0	0	18	CC(C)CCCCCCCCCCCCC(=O)NCC(=O)N[C@@H]1[C@@H](O)[C@@H](O)[C@@H](NC2=C3N=CNC3=NC=N2)O[C@H]1C(O)CO
BGC0001019	Sorangium	microsclerodermin m	1	886.386	311.85	-2.4826	12	12	NRP	Antifungal	0	0	1	0	11	CN1CC(=O)N[C@H](CC2=CNC3=CC=CC=C23)C(=O)NCC(=O)NC[C@H](O)CC(=O)N[C@H]([C@H](O)[C@@H](O)CC=CC=CC=CC2=CC=CC=C2)[C@H](O)C(=O)N[C@@H]2CC(=O)N[C@@]2(O)CC1=O
BGC0001179	Streptomyces	rishirilide b	2	372.157	115.06	2.8173	5	4	Polyketide	Inhibitor	1	0	0	0	28	CC1C(=O)c2cc3cccc(c3cc2C(C1(C(=O)O)O)(CCC(C)C)O)O
BGC0001725	Bacillus	oxetanocin a	1	251.102	119.31	-1.0933	8	3	Other		1	0	0	0	4	C1=NC2=C(C(=N1)N)N=CN2[C@H]3[C@@H]([C@H](O3)CO)CO
BGC0001560	Moorea	cryptomaldamide	1	399.248	171.34	-0.7246	5	5	NRP		0	0	0	0	12	CC(C)[C@@H](/C=C(\C)/C(=O)O)N(C)C(=O)[C@H](C(C)C)NC(=O)[C@H](CO)N=C(N)N
BGC0001156	Streptomyces	platencin	1	425.184	123.93	4.0225	5	4	Terpene	Antibacterial	1	1	0	0	31	C[C@@]1(C2C[C@@H]3CC[C@]2(CC3=C)C=CC1=O)CCC(=O)NC4=C(C=CC(=C4O)C(=O)O)O
BGC0000270	Streptomyces	simocyclinone d8	1	931.209	309.42	3.0035	18	8	Polyketide		1	0	0	0	38	C[C@H]1O[C@H](C[C@@H](OC(=O)\C=C\C=C\C=C\C=C\C(=O)NC2=C(O)C3=C(OC2=O)C(Cl)=C(O)C=C3)[C@@H]1OC(C)=O)C1=CC=C2C(=O)C34OC3(C(O)CC3(O)CC(C)=CC(=O)C43O)C(O)C2=C1O
BGC0001463	Pseudoalteromonas	2,3,4,5-tetrabromopyrrole	1	-1					Other	Inhibitor,Signalling	0	0	0	0	6
BGC0001538	Streptomyces	caboxamycin	1	255.053	83.56	2.8986	4	2	NRP		1	0	0	0	10	OC(=O)C1=CC=CC2=C1N=C(O2)C1=C(O)C=CC=C1
BGC0000507	Staphylococcus	epicidin	1	-1					RiPP		1	0	0	0	7
BGC0000090	Actinosynnema	macbecin	2	558.294	143.25	3.3344	8	2	Polyketide		1	0	0	0	23	CO[C@H]1C[C@H](C)[C@@H](OC)C2=CC(=O)C=C(NC(=O)\C(C)=C\C=C/[C@@H](C)[C@@H](OC(N)=O)\C(C)=C\[C@H](C)[C@H]1OC)C2=O
BGC0001788	Streptococcus	suicin 65	1	-1					RiPP		1	0	0	0	10
BGC0001015	Planktothrix	microcystin	1	994.549	343.14	0.6184	11	10	NRP		0	0	0	0	9	C[C@H]1[C@@H](NC(=O)[C@@H](NC(=O)[C@H]([C@@H](NC(=O)[C@H](NC(=O)[C@H](NC(=O)C(=C)N(C(=O)CC[C@@H](NC1=O)C(=O)O)C)C)CC(C)C)C(=O)O)C)CCCN=C(N)N)/C=C/C(=C/[C@H](C)[C@H](CC2=CC=CC=C2)OC)/C
BGC0002031	Kitasatospora	kitasetaline	1	-1					Alkaloid		1	0	0	0	5
BGC0001987	Pseudomonas	koreenceine a	4	-1					Polyketide		0	0	0	0	11
BGC0000466	Streptomyces	yatakemycin	1	679.174	181.05	4.7411	9	5	NRP		1	0	0	0	31	COC1=CC2=C(NC(=C2)C(=O)N2CC3CC33C4=C(NC(=C4)C(=O)N4CCC5=C6C=C(NC6=C(OC)C(O)=C45)SC(C)=O)C(=O)C=C23)C=C1O
BGC0000302	Anabaena	anabaenopeptin	1	850.47	290.98	0.3417	9	9	NRP	Inhibitor	0	0	0	0	7	C[C@H]1C(=O)N[C@H](C(=O)NCCCC[C@H](C(=O)N[C@H](C(=O)N([C@H](C(=O)N1C)CCC2=CC=C(C=C2)O)C)C(C)C)NC(=O)N[C@@H](CCCN=C(N)N)C(=O)O)CC3=CC=CC=C3
BGC0001870	Xenorhabdus	putrebactin	2	-1					Other		0	0	0	0	10
BGC0000749	Escherichia	capsular polysaccharide	1	-1					Saccharide		0	0	0	0	3
BGC0001329	Streptomyces	rakicidin d	1	494.274	168.13	0.1299	7	4	NRP		1	0	0	0	19	CN(CC(N[C@@H]([C@@H](C(N)=O)O)C(OC([C@H](C)CCCCCC)[C@H](C)C(N1)=O)=O)=O)C(/C=C/C1=C)=O
BGC0001028	Nostoc	nostopeptolide a2	1	1066.57	351.01	-0.8726	14	9	NRP		0	0	0	0	8	CCCC(=O)N[C@@H](C(C)C)C(=O)NC1COC(=O)[C@@H]2CCCN2C(=O)[C@H](CC2=CC=C(O)C=C2)NC(=O)[C@H](CC(N)=O)NC(=O)CNC(=O)[C@H](CC(C)C)NC(=O)CC(=O)[C@H](CC(C)C)NC(=O)C2C[C@H](C)CN2C1=O
BGC0001046	Streptomyces	streptolydigin	1	600.305	147.16	2.4601	10	3	NRP	Antibacterial	1	1	0	0	38	C[C@H]1[C@@H]2C=C[C@]3(CO3)[C@@](O2)(O[C@H]1[C@H](C)/C=C(\C)/C=C/C(=O)C4=C(N([C@H](C4=O)[C@H](C)C(=O)NC)[C@@H]5CC[C@@H]([C@@H](O5)C)O)O)C
BGC0000778	Aeromonas	lipopolysaccharide	1	-1					Saccharide		0	0	0	0	7
BGC0001138	Marinactinospora	a201a	1	802.339	250.93	-0.8016	19	6	Other	Antibacterial	1	1	0	0	37	CN(C)C1=C2C(N([C@H]3[C@H](O)[C@H](NC(/C(C)=C/C4=CC=C(O[C@@H]([C@@H](O)[C@H]/5O)OC5=C(CO[C@@H]6[C@@H](O)[C@@H](OC)[C@H](OC)[C@@H](C)O6)/OC)C=C4)=O)[C@@H](CO)O3)C=N2)=NC=N1
BGC0001108	symbiont	pederin	3	503.309	124.94	1.3759	9	3	Polyketide	Cytotoxic,Inhibitor,dermatotoxic	3	0	0	0	16	C[C@H]1[C@H](O[C@](CC1=C)([C@@H](C(=O)N[C@H]([C@@H]2C[C@H](C([C@H](O2)C[C@@H](COC)OC)(C)C)O)OC)O)OC)C
BGC0001636	Curvularia	kk-1	1	-1					NRP		2	0	0	0	10
BGC0001084	Aspergillus	notoamide a	1	463.211	99.18	2.524	5	2	NRP	Cytotoxic,Inhibitor	2	0	0	0	18	CC1(C)[C@@H]2C[C@]34CCCN3C(=O)[C@@]2(C[C@@]11C(=O)N(O)C2=C1C=CC1=C2C=CC(C)(C)O1)NC4=O
BGC0001911	Streptomyces	raimonol	1	-1					Terpene		1	0	0	0	10
BGC0001448	uncultured	malacidin a	2	1248.62	506.76	-3.9125	17	16	NRP	Antibacterial	3	1	0	0	39	C[C@@H]1C[C@H]2C(=O)NC([C@@H](C(=O)N[C@@H](C(=O)N[C@H](C(=O)N[C@H](C(=O)N[C@H](C(=O)NCC(=O)N[C@@H](C(=O)N[C@H](C(=O)N2C1)C(C)C)C(C)C(=O)O)CC(=O)O)C(C(=O)O)O)CCCCN)C(C)C)NC(=O)[C@H](C(C)C(=O)O)NC(=O)/C=C/C=C\CCC(C)C)C
BGC0001376	Streptosporangium	ws79089a	3	488.111	150.59	2.9453	9	4	Polyketide		1	0	0	0	33	COC1=C2C(O)CC3=CC4=C(C(=O)OC(C)C4)C(O)=C3C2=C(O)C2=C1C(=O)C1=C(C=CC=C1O)C2=O
BGC0000709	Streptomyces	neomycin	1	614.312	353.11	-8.8953	19	13	Saccharide		1	1	0	0	38	NC[C@H]1O[C@H](O[C@@H]2[C@@H](CO)O[C@@H](O[C@@H]3[C@@H](O)[C@H](N)C[C@H](N)[C@H]3O[C@H]3O[C@H](CN)[C@@H](O)[C@H](O)[C@H]3N)[C@@H]2O)[C@H](N)[C@@H](O)[C@@H]1O
BGC0000157	Streptomyces	tautomycetin	1	606.34	164.5	3.9463	10	3	Polyketide		1	0	0	0	14	CC\C(C=C)=C/C(=O)CC(C)CC(C)CCC(O)C(C)C(=O)CC(O)C(C)C(C)OC(=O)C[C@@H](O)C1=C(C)C(=O)OC1=O
BGC0000192	Streptomyces	aclacinomycin	1	811.342	217.05	3.1577	16	4	Polyketide		1	0	0	0	15	CC[C@]1(C[C@@H](C2=C([C@H]1C(=O)OC)C=C3C(=C2O)C(=O)C4=C(C3=O)C=CC=C4O)OC5CC(C(C(O5)C)OC6CC(C(C(O6)C)OC7CCC(=O)C(O7)C)O)N(C)C)O
BGC0001695	Streptomyces	neoantimycin	1	698.305	203.86	3.0715	12	4	NRP		1	0	0	0	17	[H][C@]1(OC(=O)C(C)(C)[C@@H](O)[C@@H](CC2=CC=CC=C2)OC(=O)[C@@H](OC(=O)[C@@H](NC(=O)C2=C(O)C(NC=O)=CC=C2)[C@H](C)OC1=O)C(C)C)[C@@H](C)CC
BGC0000494	Streptococcus	uberolysin	1	-1					RiPP		1	0	0	0	7
BGC0001340	Byssochlamys	byssochlamic acid	1	332.126	86.74	2.3728	6	0	Polyketide		2	0	0	0	20	CCC[C@@H]1CC2=C(C[C@H](CC)CC3=C1C(=O)OC3=O)C(=O)OC2=O
BGC0001434	Xenorhabdus	nematophin	1	272.152	61.96	2.4418	2	2	NRP		0	0	0	0	3	CCC(C)C(=O)C(=O)NCCC1=CNC2=CC=CC=C12
BGC0001190	Fusarium	fusaric acid	1	179.095	50.19	2.1224	2	1	Polyketide		2	0	0	0	22	CCCCC1=CN=C(C=C1)C(=O)O
BGC0000057	Aspergillus	f9775a	3	396.085	130.36	1.54352	8	3	Polyketide	Inhibitor	2	0	0	0	10	CC1=CC2=C(C(=C1)O)OC3=C(O2)C4(C5C(=CC(=O)C5(C(=O)C4=C(C3=O)O)O)C)C
BGC0001809	Bacillus	trans-aconitic acid	1	174.016	111.9	-0.4433	3	3	Other		1	0	0	0	2	C(/C(=C\C(=O)O)/C(=O)O)C(=O)O
BGC0000072	Pyxidicoccus	gulmirecin a	1	542.273	169.05	0.9527	11	4	Polyketide	Antibacterial	0	1	0	0	7	CC=C(C)C1CC=C(C)C(OC2OC(CO)C(O)C2O)C(OC(=O)CC(C)C)C(=O)CC(O)C(C)C(=O)O1
BGC0001374	Streptomyces	thienodolin	1	249.997	58.88	3.1349	2	2	Other		1	0	0	0	14	NC(=O)C1=CC2=C(NC3=C2C=CC(Cl)=C3)S1
BGC0001442	Streptomyces	actinonin	1	385.258	118.97	1.2025	5	4	NRP	Inhibitor	1	0	0	0	18	[H][C@@](CCCCC)(CC(=O)NO)C(=O)N[C@@]([H])(C(C)C)C(=O)N1CCC[C@H]1CO
BGC0000910	Streptomyces	melanin	1	318.064	99.86	1.32664	4	2	Other		1	0	0	0	2	CC1=C2C3=C(C4=CNC5=C(C(=O)C(=O)C(=C45)C3=CN2)C)C(=O)C1=O
BGC0001707	Streptomyces	nosiheptide	1	1221.15	381.23	3.51322	24	10	RiPP		1	0	0	0	23	C/C=C\1/C2=NC(=CS2)C(=O)NC3CC(C(=O)OCC4=C5C(=C(C(=O)SCC(C6=NC(=CS6)C7=N/C(=C\8/NC(=CS8)C(=O)NC(=C)C(=O)N)/C(=O)C=C7C9=NC(=CS9)C(=O)NC(C(=O)N1)C(C)O)NC(=O)C1=CSC3=N1)NC5=CC=C4)C)O
BGC0001644	Gynuella	lacunalides	1	-1					Polyketide		0	0	0	0	21
BGC0001596	Streptomyces	fluostatins m-q	1	-1					Polyketide		1	0	0	0	43
BGC0000293	Aspergillus	acetylaszonalenin	1	415.19	69.72	3.696	3	1	NRP		2	0	0	0	3	CC(=O)N1[C@H]2[C@](C[C@H]3N2C(=O)C4=CC=CC=C4NC3=O)(C5=CC=CC=C51)C(C)(C)C=C
BGC0000992	Fusarium	fusaridione a	1	373.225	77.84	3.0213	5	2	NRP		2	0	0	0	16	C/C=C/[C@@H]1C=C[C@@H]2C[C@@H](CC[C@H]2[C@]1(C)C(=O)C3=C(N([C@H](C3=O)CO)C)O)C
BGC0000889	Streptomyces	bagremycin a	2	255.09	72.55	2.8366	4	2	Other		1	0	0	0	18	C=CC1=CC=C(C=C1)OC(=O)C2=CC(=C(C=C2)O)N
BGC0000575	Rhodococcus	lariatin	1	2035.06	805.55	-6.50663	26	28	RiPP		1	0	0	0	5	CC[C@H](C)[C@@H](C(=O)N[C@@H](CC(C)C)C(=O)N1CCC[C@H]1C(=O)O)NC(=O)[C@H](C(C)C)NC(=O)[C@H](CC(=O)N)NC(=O)[C@H](CO)NC(=O)[C@H](CC2=CN=CN2)NC(=O)CNC(=O)[C@H](C(C)C)NC(=O)[C@H](CC3=CNC4=CC=CC=C43)NC(=O)[C@@H]5CCC(=O)NCC(=O)N[C@H](C(=O)N[C@H](C(=O)N[C@H](C(=O)N[C@H](C(=O)N[C@H](C(=O)N[C@H](C(=O)N5)CCCNC(=N)N)CC6=CC=C(C=C6)O)C(C)C)CC(C)C)CCC(=O)N)CO
BGC0001306	Aspergillus	asperipin 2a	1	-1					RiPP		2	0	0	0	4
BGC0001609	Trichoderma	gliovirin	1	480.066	130.09	0.641	10	3	NRP		2	0	0	0	8	[H][C@@]12O[C@@]11C[C@@]34SSC(C5=CC=C(OC)C(OC)=C5O)[C@@]([H])(NC3=O)C(=O)N4O[C@@]1([H])[C@H](O)C=C2
BGC0000638	Pantoea	carotenoid	1	738.674	99.38	11.5564	6	4	Terpene		0	0	0	0	6	C[C@H](CCCCC(C)CCC[C@@H](C)CCCC(C)CCC=C(C)C)CCC[C@H](C)CCC[C@H](C)CCCC(C)(C)O[C@@H]1[C@@H]([C@H]([C@@H]([C@H](O1)CO)O)O)O
BGC0001959	Streptomyces	taylorflavin a	2	-1					Other		1	0	0	0	10
BGC0001524	Sulfurospirillum	barnesin a	1	-1					NRP		0	0	0	0	12
BGC0001828	Streptomyces	griseochelin	1	568.434	127.45	5.5977	6	5	Polyketide		1	0	0	0	13	CCCC(C)\C=C(/C)C(O)C(C)\C=C\CCC(O)C(C)C(O)C(C)C(O)C(C)C1OC(CCC1C)C(C)C(O)=O
BGC0000030	Fusarium	bikaverin	1	382.069	123.27	2.58372	8	2	Polyketide		2	0	0	0	7	CC1=CC(=CC2=C1C(=O)C3=C(O2)C(=C4C(=C3O)C(=O)C=C(C4=O)OC)O)OC
BGC0001399	Aspergillus	fellutamide b	1	555.363	210.78	0.7184	7	6	NRP		2	0	0	0	5	[H][C@@](CC(C)C)(NC(=O)[C@]([H])(CCC(N)=O)NC(=O)[C@]([H])(CC(N)=O)NC(=O)C[C@H](O)CCCCCCCCC)C=O
BGC0001141	Penicillium	4-epi-15-epi-brefeldin a	1	280.167	66.76	1.9624	4	2	Polyketide		2	0	0	0	10	[H][C@@]12C[C@H](O)C[C@@]1([H])[C@@H](O)\C=C\C(=O)O[C@H](C)CCC\C=C\2
BGC0001620	Streptomyces	ilamycins	1	-1					Polyketide		1	0	0	0	21
BGC0001403	Aspergillus	trypacidin	1	344.09	88.13	1.52992	7	0	Polyketide		2	0	0	0	14	CC1=CC2=C(C(=C1)OC)C(=O)C3(O2)C(=CC(=O)C=C3OC)C(=O)OC
BGC0000075	Streptomyces	hygrocin a	2	509.205	147.07	3.26762	8	3	Polyketide		1	0	0	0	31	CCC1CCC(=O)C2=C(O)C(C)=CC3=C2C(=O)C=C(NC(=O)C\C=C(C)\C(=O)O[C@@H](C)[C@@H](O)\C=C\1)C3=O
BGC0001523	Streptomyces	azalomycin f3a	1	1067.65	363.33	3.31997	17	14	Polyketide		1	0	0	0	23	CC(CCC\C=C\CCCNC(N)=N)C1OC(=O)\C(C)=C/C=C\C(C)C(O)CC(O)C(C)C(O)CCC(C)C(O)CC2(O)OC(CC(O)C2O)CC(CC(O)CC(O)CC(O)\C(C)=C/C=C\C1C)OC(=O)CC(O)=O
BGC0001337	uncultured	lazarimide a	3	487.034	128.02	2.6555	7	4	Alkaloid	Cytotoxic	3	0	0	0	18	O=C1[C@@]2(O)N3C(C4=C([C@@]2(O)C(N1C)=O)C5=CC(Cl)=CC=C5N4)=C(OC)C6=CC(O)=C(Cl)C=C63
BGC0001945	Myxococcus	chloromyxamide	1	-1					NRP		0	0	0	0	29
BGC0001478	Streptomyces	desferrioxamine e	1	600.348	208.92	0.8535	9	6	Other	Siderophore	1	0	0	1	4	C1CCNC(=O)CCC(=O)N(CCCCCNC(=O)CCC(=O)N(CCCCCNC(=O)CCC(=O)N(CC1)O)O)O
BGC0000432	Streptomyces	streptothricin	1	1142.72	544.5	-7.6848	23	20	NRP		1	0	0	0	24	C1[C@H]([C@@H]2[C@@H](C(=O)N1)N=C(N2)N[C@H]3[C@@H]([C@@H]([C@H]([C@H](O3)CO)OC(=O)N)O)NC(=O)C[C@H](CCCNC(=O)C[C@H](CCCNC(=O)C[C@H](CCCNC(=O)C[C@H](CCCNC(=O)C[C@H](CCCNC(=O)C[C@H](CCCN)N)N)N)N)N)N)O
BGC0000885	Streptomyces	4-hydroxy-3-nitrosobenzamide	1	166.038	92.75	0.889	4	2	Other		1	0	0	0	14	NC(=O)C1=CC(N=O)=C(O)C=C1
BGC0001792	Streptomyces	surugamide a	2	911.621	258.82	2.5005	9	9	NRP		1	0	0	0	21	CC[C@H](C)[C@@H]1NC(=O)[C@@H](CC(C)C)NC(=O)[C@@H](CC2=CC=CC=C2)NC(=O)[C@@H](NC(=O)[C@H](CCCCN)NC(=O)[C@H](NC(=O)[C@@H](NC(=O)[C@@H](C)NC1=O)[C@@H](C)CC)[C@H](C)CC)[C@@H](C)CC
BGC0001307	Streptomyces	chaxapeptin	1	-1					RiPP		1	0	0	0	7
BGC0001343	Stigmatella	aurachin a	2	395.246	56.4	5.30902	3	1	Polyketide		0	0	0	0	18	[H][C@@]1(CC2=C(O1)C(C)=N(=O)C1=CC=CC=C21)[C@@](C)(O)CC\C=C(/C)CCC=C(C)C
BGC0000611	Streptomyces	siomycin a	1	1647.46	562.74	0.509	31	17	RiPP		1	0	0	0	27	CC=C1C2=NC(CS2)C(=O)NC(C3=NC(=CS3)C(=O)NC4C(OC(=O)C5=NC6=C(C=CC(C6O)NC(C(=O)NC(=C)C(=O)NC(=C)C(=O)NC(C(=O)NC7(CCC(=NC7C8=CSC4=N8)C9=NC(=CS9)C(=O)NC(=C)C(=O)NC(=C)C(=O)N)C2=NC(=CS2)C(=O)NC(C(=O)N1)C(C)O)C)C(C)C)C(=C5)C(C)O)C)C(C)(C(C)O)O
BGC0000846	Pseudomonas	tabtoxin	1	289.127	161.98	-3.095	6	6	Other		0	0	0	0	22	CC(O)C(NC(=O)C(N)CCC1(O)CNC1=O)C(O)=O
BGC0001432	Stigmatella	myxochromide d	1	722.4	206.1	1.9626	8	5	NRP		0	0	0	0	10	C1(=O)N[C@@H](CC(C)C)C(=O)N[C@@H](C)C(=O)N[C@@H](CCC(=O)N)C(=O)O[C@H](C)[C@H](N(C)C(=O)/C=C/C=C/C=C/C=C/C=C/C=C/C=C/C)C(=O)N[C@@H]1C
BGC0001628	Kibdelosporangium	jbir-78	2	825.391	298.53	-1.2312	10	10	NRP		1	0	0	0	9	CC(C)[C@H](O)[C@@H](NC(=O)[C@H](C)NC(=O)[C@@H](CC(O)=O)NC(=O)[C@@H](NC(=O)CC1=CC=CC=C1)C(C)C)C(=O)NCC(=O)N[C@H](C)C(=O)N[C@@H](CC1=CC=CC=C1)C(O)=O
BGC0000590	Escherichia	microcin n	1	-1					RiPP		0	0	0	0	5
BGC0001332	Streptomyces	microtermolide a	1	451.268	133.83	1.1782	6	4	NRP		1	0	0	0	15	CCC[C@@H](C)[C@@H]1[C@H](C(=O)NC(=C)/C=C/C(=O)N[C@H](C(=O)N[C@@H](C(=O)O1)C(C)C)C)CCO
BGC0000210	Streptomyces	chromomycin a3	1	1182.51	359.34	1.54642	26	8	Polyketide	Cytotoxic	1	0	0	0	36	[H][C@]1(CC2=C(C(O)=C3C(O)=C(C)C(O[C@H]4C[C@@H](OC(C)=O)[C@@H](O[C@@H]5C[C@@H](O)[C@@H](OC)[C@@H](C)O5)[C@@H](C)O4)=CC3=C2)C(=O)[C@H]1O[C@H]1C[C@@H](O[C@H]2C[C@@H](O[C@H]3C[C@](C)(O)[C@@H](OC(C)=O)[C@H](C)O3)[C@H](O)[C@@H](C)O2)[C@H](O)[C@@H](C)O1)[C@H](OC)C(=O)[C@@H](O)[C@@H](C)O
BGC0000782	Burkholderia	o-antigen	1	-1					Saccharide		0	0	0	0	21
BGC0001797	Streptomyces	telomestatin	1	582.071	194.57	5.76954	16	0	RiPP		1	0	0	0	21	CC1=C2N=C(O1)C1CSC(=N1)C1=COC(=N1)C1=COC(=N1)C1=COC(=N1)C1=COC(=N1)C1=COC(=N1)C1=C(C)OC2=N1
BGC0000695	Micromonospora	fortimicin	1	601.193	341.74	-4.891	14	10	Saccharide		1	0	0	0	44	CC([C@@H]1CC[C@H]([C@H](O1)O[C@@H]2[C@H]([C@@H]([C@@H]([C@H]([C@H]2O)N(C)C(=O)CN)OC)O)N)N)N.OS(=O)(=O)O.OS(=O)(=O)O
BGC0000832	Streptomyces	clorobiocin	1	696.209	189.78	5.37032	11	5	Saccharide	Antibacterial	1	1	0	0	28	CC1=CC=C(N1)C(=O)O[C@H]2[C@H]([C@@H](OC([C@@H]2OC)(C)C)OC3=C(C4=C(C=C3)C(=C(C(=O)O4)NC(=O)C5=CC(=C(C=C5)O)CC=C(C)C)O)Cl)O
BGC0000149	Sorangium	spirangien o	1	702.471	134.91	6.8018	8	4	Polyketide		0	0	0	0	15	[H][C@@]1(O[C@@]2(C[C@@H](OC)[C@@H](C)[C@]([H])(O2)[C@H](C)[C@@H](O)[C@@H](C)C\C(C)=C\C)[C@H](O)C[C@@H]1C)[C@@H](C)[C@@H](O)[C@@H](C)\C=C/C=C/C=C\C=C\C=C/[C@H](CC(O)=O)OC
BGC0001622	Streptomyces	isatropolone a	3	-1					Polyketide		1	0	0	0	21
BGC0000891	Pseudoalteromonas	pentabromopseudilin	1	548.621	36.02	6.1998	1	2	Other	Antibacterial,Cytotoxic,Inhibitor	0	1	0	0	10	C1=C(C=C(C(=C1Br)O)C2=C(C(=C(N2)Br)Br)Br)Br
BGC0000502	Bacillus	cerecidin	8	-1					RiPP		1	0	0	0	17
BGC0001200	Streptomyces	lorneic acid a	1	258.162	37.3	4.68632	1	1	Polyketide		1	0	0	0	21	CCCC\C=C\C1=C(/C=C/CC(O)=O)C=CC(C)=C1
BGC0000235	Streptomyces	kiamycin	1	322.121	58.92	3.02582	4	2	Polyketide		1	0	0	0	20	COC1=CC=CC2=C1[C@H](O)[C@]1(O)C=CC3=C4[C@@H]1[C@@H]2OC4=CC(C)=C3
BGC0000428	Streptosporangium	sibiromycin	1	475.232	143.75	0.94252	9	6	NRP		1	0	0	0	26	CN[C@H]1[C@H](C)O[C@@H](OC2=CC3=C(N[C@H](O)[C@@H]4CC(\C=C\C)=CN4C3=O)C(O)=C2C)[C@H](O)[C@]1(C)O
BGC0001011	Streptomyces	meridamycin	1	821.529	214.52	4.2749	12	7	NRP		1	0	0	0	38	CC\C1=C/CC(OC(=O)C2CCCCN2C(=O)C(=O)C2(O)OC(CCC2C)CC(O)C(C)C(O)CC(O)CC(O)\C(C)=C\C(C)CC(C)C1O)C(\C)=C\C(C)C(C)O
BGC0001799	Papaver	thebaine	1	311.152	30.93	2.4245	4	0	Alkaloid		3	0	0	0	12	CN1CC[C@]23[C@@H]4C(=CC=C2[C@H]1CC5=C3C(=C(C=C5)OC)O4)OC
BGC0000289	Nonomuraea	a40926	1	-1					NRP	Antibacterial	1	1	0	0	55
BGC0000930	Fusarium	deoxynivalenol	1	296.126	99.52	-0.8377	6	3	Other		2	0	0	0	9	CC1=C[C@@H]2[C@]([C@@H](C1=O)O)([C@]3(C[C@H]([C@H]([C@@]34CO4)O2)O)C)CO
BGC0000062	Fusarium	fumonisin b1	1	721.388	288.51	2.5642	12	8	Polyketide		2	0	0	0	24	CCCC[C@@H](C)[C@@H](OC(=O)C[C@H](CC(O)=O)C(O)=O)[C@H](C[C@@H](C)C[C@H](O)CCCC[C@@H](O)C[C@H](O)[C@H](C)N)OC(=O)C[C@H](CC(O)=O)C(O)=O
BGC0001488	Pseudomonas	4-formylaminooxyvinylglycine	1	160.048	101.65	-1.4104	4	3	Other		0	0	0	0	14	N[C@@H](\C=C\ONC=O)C(O)=O
BGC0001901	Trichoderma	tricholignan a	1	-1					Polyketide		2	0	0	0	9
BGC0000573	Caulobacter	caulonodin i	2	-1					RiPP		0	0	0	0	8
BGC0001729	Penicillium	paraherquonin	1	428.184	91.29	2.5424	7	1	Polyketide		2	0	0	0	16	[H][C@]12OC(=O)[C@]3(C)C[C@@]4([H])[C@H](C)C5=CC(=O)OC(C)(C)C5=C[C@]5([H])OC([C@H](C)O1)=C([C@]45C)[C@]23O
BGC0002018	Streptomyces	azomycin	1	-1					Other		1	0	0	0	6
BGC0000693	Bacillus	butirosin a	2	555.275	311.71	-7.7851	16	12	Saccharide		1	0	0	0	26	C1[C@@H]([C@H]([C@@H]([C@H]([C@@H]1NC(=O)[C@H](CCN)O)O)O[C@H]2[C@@H]([C@H]([C@H](O2)CO)O)O)O[C@@H]3[C@@H]([C@H]([C@@H]([C@H](O3)CN)O)O)N)N
BGC0001501	Fischerella	ambiguine p	1	359.225	36.02	5.7773	1	2	Alkaloid		0	0	0	0	33	C[C@@]1(CC[C@@]2(O)C3=C1C=CC(C)(C)C1=C3C3=C(N1)C=CC=C3C2(C)C)C=C
BGC0001132	Xenorhabdus	xenotetrapeptide	1	410.289	116.4	0.9533	4	4	NRP		0	0	0	0	1	CC(C)[C@H]1NC(=O)[C@@H](NC(=O)[C@H](NC(=O)[C@@H](NC1=O)C(C)C)C(C)C)CC(C)C
BGC0000974	Chondromyces	crocacin	1	538.304	102.96	4.3699	6	2	NRP		0	0	0	0	21	COC(\C=C\C1=CC=CC=C1)C(C)C(OC)C(C)\C=C\C(\C)=C\C(=O)N\C=C/C\C=C/C(=O)NCC(=O)OC
BGC0001790	Pseudomonas	sulfazecin	1	396.095	205.43	-3.2129	8	5	NRP		0	0	0	0	17	C[C@H](C(=O)N[C@]1(CN(C1=O)S(=O)(=O)O)OC)NC(=O)CC[C@H](C(=O)O)N
BGC0001980	Pseudomonas	lokisin	1	-1					NRP		0	0	0	0	14
BGC0001632	Microcystis	kawaguchipeptin a	1	1420.68	524.82	-3.6855	19	16	RiPP		0	0	0	0	6	[H][C@](C)(O)[C@]1([H])NC(=O)[C@]([H])(CO)NC(=O)[C@@H]2C[C@@]3(CC=C(C)C)C4=C(N[C@@]3([H])N2C(=O)[C@]([H])(CC(N)=O)NC(=O)[C@]([H])(CC(N)=O)NC(=O)[C@]([H])(CC(O)=O)NC(=O)CNC(=O)[C@]([H])(CC(N)=O)NC(=O)[C@@]([H])(CC(C)C)NC(=O)[C@@H]2C[C@@]3(CC=C(C)C)C5=CC=CC=C5N[C@@]3([H])N2C(=O)[C@]2([H])CCCN2C1=O)C=CC=C4
BGC0001558	Streptomyces	cosmomycin c	1	1172.59	292.99	4.7026	23	7	Polyketide		1	0	0	0	52	CC[C@@]1(O)C[C@H](O[C@H]2C[C@@H]([C@H](O[C@H]3C[C@H](O)[C@H](O[C@H]4CC[C@H](O)[C@H](C)O4)[C@H](C)O3)[C@H](C)O2)N(C)C)C2=C(O)C3=C(C(O)=C2[C@H]1O[C@H]1C[C@@H]([C@H](O[C@H]2CC[C@H](O[C@H]4CC[C@H](O)[C@H](C)O4)[C@H](C)O2)[C@H](C)O1)N(C)C)C(=O)C1=C(C(O)=CC=C1)C3=O
BGC0001833	Burkholderia	icosalide a	2	712.462	209.46	2.5606	10	6	NRP	Antibacterial,Antifungal,Swarming/Biofilm Induction	0	1	1	0	1	CCCCCCCC1CC(=O)NC(CO)C(=O)NC(CC(C)C)C(=O)OC(CCCCC)CC(=O)NC(CC(C)C)C(=O)NC(CO)C(=O)O1
BGC0000853	Streptomyces	ectoine	1	142.074	61.69	-0.1487	3	2	Other		1	0	0	0	4	CC1=NCC[C@H](N1)C(=O)O
BGC0001342	Chondromyces	cmc-thuggacin a	2	561.276	140.34	3.8226	9	5	NRP		0	0	0	0	16	C/C=C(\C)/C=C(\C)/CC(C)C(C(C1C/C=C\C=C\C(CC(C(C2=NC(=CS2)/C=C(/C(=O)O1)\C)CO)O)O)O)O
BGC0001578	Talaromyces	duclauxin	1	546.116	166.64	2.34144	11	2	Polyketide		2	0	0	0	14	COC12C3C(OC(C)=O)C4(COC(=O)C5=C(O)C=C(C)C(C3=O)=C45)C1C(=O)C1=COC(=O)C3=C1C2=C(C)C=C3O
BGC0000361	Aspergillus	gliotoxin	2	326.039	81.08	-0.3037	6	2	NRP	Antibacterial,Antifungal,Antioxidant,Cytotoxic,Inhibitor	2	1	1	0	13	CN1C(=O)[C@]23CC4=CC=C[C@H](O)[C@@H]4N2C(=O)[C@@]1(CO)SS3
BGC0001392	Chitinophaga	pinensins	1	-1					RiPP		0	0	0	0	17
BGC0000330	Cupriavidus	cupriachelin	1	807.386	384.65	-3.7242	14	13	NRP	Antibacterial,Siderophore	0	1	0	1	17	CCCCCCCCCC(=O)N[C@@H]([C@H](O)C(O)=O)C(=O)N[C@@H](CCN)C(=O)N[C@@H]([C@H](O)C(O)=O)C(=O)NCC(=O)N[C@@H](CCCN(O)C(=O)C[C@H](C)O)C(O)=O
BGC0001820	Gliocladium	verticillin	1	680.1	125.53	2.36	11	3	NRP		2	0	0	0	13	C[C@]12C(=O)N3[C@@H]4[C@@](C[C@@]3(C(=O)N1C)SS2)(C5=CC=CC=C5N4)C67[C@@H]([C@]89C(=O)N([C@](C(=O)N8[C@H]6NC1=CC=CC=C71)(SS9)C)C)O
BGC0000458	Streptomyces	viomycin	1	783.293	467.46	-9.5356	17	17	NRP		1	1	0	0	21	C1[C@@H](N=C(NC1[C@@H]2C(=O)NC[C@H](C(=O)N[C@@H](C(=O)N[C@H](C(=O)N/C(=C\NC(=O)N)/C(=O)N2)CO)CO)NC(=O)C[C@@H](CCCN)N)N)O.OS(=O)(=O)O
BGC0000329	Pseudomonas	corpeptin a	2	2094.21	817.71	13.191	28	25	NRP		0	0	0	0	11	CCCCCCCC(CC(=N/C(=C\C)/C(=O)N1CCC[C@H]1C(=N[C@@H](C)C(=N[C@@H](C)C(=N[C@@H](C)C(=N[C@@H](C(C)C)C(=N[C@@H](C(C)C)C(=N/C(=C\C)/C(=N[C@@H](CCO)C(=N[C@@H](C(C)C)C(=N[C@@H]([C@H](C)CC)C(=NC(=C)C(=N[C@@H](C)C(=N[C@@H](C)C(=N[C@@H](C)C(=N[C@@H](C(C)C)C(=N/C(=C\C)/C(=N[C@H]2[C@@H](OC(=O)[C@@H](N=C([C@@H](N=C([C@@H](N=C([C@@H](N=C2O)C)O)CCN)O)CO)O)[C@@H](C)CC)C)O)O)O)O)O)O)O)O)O)O)O)O)O)O)O)O)O)O
BGC0001574	Streptomyces	diisonitrile antibiotic sf2768	1	-1					NRP		1	0	0	0	18
BGC0000618	Enterococcus	enterocin a	1	1110.51	503.93	-7.2407	19	18	RiPP		1	0	0	0	3	CC(O)C(N)C(=O)NC(C(C)O)C(=O)NC(CC1=CNC=N1)C(=O)NC(CO)C(=O)NCC(=O)NC(CCCCN)C(=O)NC(CC1=CC=C(O)C=C1)C(=O)NC(CC1=CC=C(O)C=C1)C(=O)NCC(=O)NC(CC(N)=O)C=O
BGC0000656	Xanthobacter	zeaxanthin	1	568.428	40.46	10.5474	2	2	Terpene		0	0	0	0	3	CC1=C(C(C[C@@H](C1)O)(C)C)/C=C/C(=C/C=C/C(=C/C=C/C=C(/C=C/C=C(/C=C/C2=C(C[C@H](CC2(C)C)O)C)\C)\C)/C)/C
BGC0001219	Chaetomium	shanorellin	1	182.058	74.6	0.279	4	2	Polyketide		2	0	0	0	7	CC1=C(C(=O)C(=O)C(=C1O)C)CO
BGC0001818	Streptomyces	vazabitide a	1	271.153	115.66	-1.6435	5	4	NRP		1	0	0	0	46	CC(C)[C@H](N)C(=O)NC(C1CC(O)C2CN12)C(O)=O
BGC0002029	Streptomyces	bagremycin a	9	-1					Other		1	0	0	0	17
BGC0000676	Phoma	aphidicolin	4	338.246	80.92	2.0858	4	4	Terpene	Inhibitor	2	0	0	0	6	[H][C@]12C[C@]3([H])C[C@]1(CC[C@]3(O)CO)[C@@]1(C)CC[C@@H](O)[C@@](C)(CO)[C@]1([H])CC2
BGC0000455	Amycolatopsis	vancomycin	1	1447.43	530.49	0.1062	25	19	NRP		1	0	0	0	34	C[C@H]1[C@H]([C@@](C[C@@H](O1)O[C@@H]2[C@H]([C@@H]([C@H](O[C@H]2OC3=C4C=C5C=C3OC6=C(C=C(C=C6)[C@H]([C@H](C(=O)N[C@H](C(=O)N[C@H]5C(=O)N[C@@H]7C8=CC(=C(C=C8)O)C9=C(C=C(C=C9[C@H](NC(=O)[C@H]([C@@H](C1=CC(=C(O4)C=C1)Cl)O)NC7=O)C(=O)O)O)O)CC(=O)N)NC(=O)[C@@H](CC(C)C)NC)O)Cl)CO)O)O)(C)N)O
BGC0001146	Streptomyces	cyclothiazomycin c	1	1485.32	477.26	0.4942	27	12	RiPP	Antibacterial	1	1	0	0	7	O=C([C@H]1CSC(C2=CSC(C3=CSC(C(NC([C@@H]4CSC(C5=CSC(C6=CC=C(C(N[C@@H](CC(N)=O)C7=N[C@H](C(N/C8=C\C)=O)CS7)=O)C([C@H](NC9=O)C)=N6)=N5)=N4)=O)=C)=N3)=N2)=N1)N[C@H](C(O)=O)CS[C@@](C)(C(N[C@@H](CCCCN)C(NCC(NC(C(N%10[C@H]9CCC%10)=O)=C)=O)=O)=O)NC8=O
BGC0001036	Streptomyces	polyoxypeptin	1	968.543	311.62	-0.7038	17	9	NRP		1	0	0	0	37	[H][C@]1(NC(=O)[C@@](C)(O)[C@@]2(O)CC[C@H](C[C@@H](C)CC)[C@@H](CC)O2)[C@@H](OC(=O)[C@]([H])(C(C)C)N(O)C(=O)[C@H]2N(CC[C@@]2(C)O)C(=O)[C@H]2C[C@@H](O)CNN2C(=O)[C@H](C)N(O)C(=O)[C@H]2CCCNN2C1=O)C(C)C
BGC0000729	Klebsiella	capsular polysaccharide	1	1004.31	523.2	-14.0081	31	20	Saccharide		0	0	0	0	16	C(C1C(C(C(C(O1)OC2C(C(OC(C2OC3C(C(C(C(O3)C(=O)O)OC4C(C(C(C(O4)CO)O)O)O)O)O)OC5C(OC(C(C5O)O)OCC6C(C(C(C(O6)O)O)O)O)CO)CO)O)O)O)O)O
BGC0002027	Pseudomonas	tgla-thiaglu	1	-1					RiPP		0	0	0	0	10
BGC0001017	Microcystis	microcystin lr	1	994.549	343.14	0.6184	11	10	NRP	Cytotoxic,Inhibitor	0	0	0	0	17	C[C@H]1[C@@H](NC(=O)[C@@H](NC(=O)[C@H]([C@@H](NC(=O)[C@@H](NC(=O)[C@H](NC(=O)C(=C)N(C(=O)CC[C@@H](NC1=O)C(=O)O)C)C)CC(C)C)C(=O)O)C)CCCN=C(N)N)/C=C/C(=C/[C@H](C)[C@H](CC2=CC=CC=C2)OC)/C
BGC0000406	Streptomyces	phosphinothricintripeptide	1	180.043	107.9	-2.9949	4	1	NRP	Antibacterial	1	1	0	0	29	CP(=O)(CCC(C(=O)[O-])[NH3+])[O-]
BGC0001348	Streptomyces	jbir-100	1	674.403	159.82	5.6755	9	4	Polyketide	Antibacterial,Antifungal,Cytotoxic	1	1	1	0	18	CC1C/C(=C/C=C\CC(OC(=O)/C(=C\C(=C\C(C1O)C)\C)/C)C(C)C(C(C)C2(CC(C(C(O2)C(C)C)C)OC(=O)/C=C/C(=O)O)O)O)/C
BGC0000387	Pseudomonas	mangotoxin	1	-1					NRP		0	0	0	0	13
BGC0000137	Salinispora	rifamycin	1	697.31	201.31	4.75412	12	6	Polyketide		1	1	0	0	39	C[C@H]1/C=C/C=C(\C(=O)NC2=CC(=C3C(=C2O)C(=C(C4=C3C(=O)[C@](O4)(O/C=C/[C@@H]([C@H]([C@H]([C@@H]([C@@H]([C@@H]([C@H]1O)C)O)C)OC(=O)C)C)OC)C)C)O)O)/C
BGC0001451	Candidatus	fr900359	1	1001.53	285.69	0.3769	15	5	NRP		0	0	0	0	8	CCC(=O)N[C@@H]([C@@H](C(C)C)O)C(=O)O[C@@H]([C@H]1C(=O)N([C@H](C(=O)O[C@@H]([C@@H](C(=O)O[C@@H](C(=O)N(C(=C)C(=O)N[C@H](C(=O)N([C@H](C(=O)N1)C)C)C)C)CC2=CC=CC=C2)NC(=O)C)C(C)C)[C@@H](C)OC)C)C(C)C
BGC0000877	Streptomyces	polyoxin a	2	616.198	330.29	-6.481	15	10	Other		1	0	0	0	39	C/C=C\1/CN([C@@H]1C(=O)O)C(=O)[C@H]([C@@H]2[C@H]([C@H]([C@@H](O2)N3C=C(C(=O)NC3=O)CO)O)O)NC(=O)[C@H]([C@@H]([C@H](COC(=O)N)O)O)N
BGC0001485	Actinoplanes	3-demethylchuangxinmycin	1	-1					Other		1	0	0	0	15
BGC0001476	Streptomyces	pseudouridimycin	1	486.182	290.04	-5.32393	10	10	Other	Antibacterial	1	1	0	0	16	NC(=N)NCC(=O)N(O)[C@@H](CCC(N)=O)C(=O)NC[C@H]1O[C@H]([C@H](O)[C@@H]1O)C1=CNC(=O)NC1=O
BGC0001672	[Flexibacter]	monobactam	1	435.052	206.03	-2.2239	10	3	NRP		0	0	0	0	8	C[C@H]1[C@@H](C(=O)N1S(=O)(=O)[O-])NC(=O)/C(=N\OC(C)(C)C(=O)O)/C2=CSC(=N2)[NH3+]
BGC0001752	Streptomyces	qinichelins	1	-1					NRP		1	0	0	1	18
BGC0001517	Aspergillus	asperphenamate	1	506.221	84.5	4.6122	4	2	NRP		2	0	0	0	4	C1=CC=C(C=C1)C[C@@H](COC(=O)[C@H](CC2=CC=CC=C2)NC(=O)C3=CC=CC=C3)NC(=O)C4=CC=CC=C4
BGC0000662	Streptomyces	grixazone	1	-1					Terpene		1	0	0	0	13
BGC0001391	Bacillus	thusin	1	-1					RiPP		1	0	0	0	8
BGC0001119	Streptomyces	divergolide a	4	553.268	131.39	5.0375	8	3	Polyketide	Antibacterial	1	1	0	0	29	CC[C@@H]\1CC[C@]23CC(=O)[C@H]([C@H](O2)C4=CC(=CC(=C4O3)NC(=O)C/C=C(\C(=O)O[C@@H](/C=C1)C(C=C(C)C)O)/C)O)C
BGC0001265	Bipolaris	melanin	1	318.064	99.86	1.32664	4	2	Polyketide		2	0	0	0	1	CC1=C2C3=C(C4=CNC5=C(C(=O)C(=O)C(=C45)C3=CN2)C)C(=O)C1=O
BGC0001203	uncultured	clarexpoxcin	1	-1					NRP		3	0	0	0	19
BGC0001677	Penicillium	mycophenolic acid	1	320.126	93.06	2.73322	5	2	Polyketide		2	0	0	0	7	COC1=C(C\C=C(/C)CCC(O)=O)C(O)=C2C(=O)OCC2=C1C
BGC0001356	Paenibacillus	paeninodin	1	-1					RiPP		1	0	0	0	5
BGC0001704	Nodularia	nocuolin a	1	298.226	62.13	3.4179	4	1	Other		0	0	0	0	21	CCCCC/C1=N/N(C(=O)CCO)OC(CCCCC)C1
BGC0000452	Brevibacillus	tyrocidine	1	1269.65	414.64	-0.3875	14	13	NRP		1	1	0	0	16	CC(C)C[C@H]1C(=O)N[C@@H](C(=O)N2CCC[C@H]2C(=O)N[C@H](C(=O)N[C@@H](C(=O)N[C@H](C(=O)N[C@H](C(=O)N[C@H](C(=O)N[C@H](C(=O)N[C@H](C(=O)N1)CCCN)C(C)C)CC3=CC=C(C=C3)O)CCC(=O)N)CC(=O)N)CC4=CC=CC=C4)CC5=CC=CC=C5)CC6=CC=CC=C6
BGC0001683	Bacillus	n-acyl serinol	1	-1					Other		1	0	0	0	4
BGC0000591	Alteromonas	marinostatin	1	1381.56	569.39	-6.6057	22	17	RiPP		0	0	0	0	7	C[C@@H]1[C@@H](C(=O)N[C@H](C(=O)N[C@H](C(=O)N[C@H](C(=O)N2CCC[C@H]2C(=O)N[C@H]3COC(=O)C[C@H](NC(=O)[C@@H](NC(=O)[C@H](CC(=O)O1)NC3=O)CO)C(=O)N[C@@H](CCC(=O)O)C(=O)O)CC4=CC=C(C=C4)O)CCCN=C(N)N)CCSC)NC(=O)[C@H](C)NC(=O)[C@H](CC5=CC=CC=C5)N
BGC0000708	Streptomyces	lividomycin	1	761.354	406.24	-10.0083	23	15	Saccharide		1	0	0	0	30	C1[C@H]([C@@H]([C@H]([C@@H]([C@H]1N)O[C@@H]2[C@@H](C[C@@H]([C@H](O2)CO)O)N)O[C@H]3[C@@H]([C@@H]([C@H](O3)CO)O[C@@H]4[C@@H]([C@H]([C@@H]([C@@H](O4)CN)O[C@@H]5[C@H]([C@H]([C@@H]([C@H](O5)CO)O)O)O)O)N)O)O)N
BGC0000003	Alternaria	af-toxin	1	440.205	142.89	1.53	8	3	Polyketide		2	0	0	0	6	CCC(C)C(C(=O)OC(/C=C/C=C/C=C/C(=O)O)C1(CO1)C)OC(=O)C(C(C)(C)O)O
BGC0000277	Streptomyces	urdamycin	1	890.339	257.43	2.1775	18	7	Polyketide		1	0	0	0	9	C[C@H]1[C@H](CC[C@@H](O1)O[C@]23C(=O)C[C@](C[C@]2(C(=CC4=C3C(=O)C5=C(C4=O)C(=C(C=C5)[C@H]6C[C@H]([C@@H]([C@H](O6)C)O)O[C@H]7CC[C@@H]([C@@H](O7)C)O[C@H]8C[C@H]([C@@H]([C@H](O8)C)O)O)O)SC)O)(C)O)O
BGC0000297	Planktothrix	aeruginoside 126b	2	690.395	239.79	-0.90583	10	9	NRP		0	0	0	0	17	CC(C)C[C@@H](NC(=O)[C@H](O)CC1=CC=CC=C1)C(=O)N1[C@H]2C[C@@H](CC[C@H]2C[C@H]1C(=O)NCCCCNC(N)=N)O[C@H]1OC[C@@H](O)[C@H](O)[C@H]1O
BGC0000424	Herbaspirillum	serobactin c	3	877.428	390.89	-4.1357	15	14	NRP	Siderophore	0	0	0	1	13	O=C(NC(C(O)C(O)=O)C(NC(CO)C(NC(C(O)C(O)=O)C(NC(C(C)O)C(NC(CO)C(NC1CCCN(O)C1=O)=O)=O)=O)=O)=O)CCCCCCCCCCCCC
BGC0001830	Salinispora	rosamicin	3	581.356	135.13	2.6704	10	2	Polyketide		1	0	0	0	23	CCC1OC(=O)CC(O)C(C)C(O[C@@H]2O[C@H](C)C[C@@H]([C@H]2O)N(C)C)C(CC=O)CC(C)C(=O)\C=C\C2(C)OC2C1C
BGC0001846	Streptomyces	valinomycin	2	-1					Saccharide	Antibacterial,Cytotoxic	1	1	0	1	23
BGC0000903	Streptomyces	fluorometabolite	1	-1					Other		1	0	0	0	12
BGC0001829	Streptomyces	α,β-epoxyketone	1	-1					NRP		1	0	0	0	13
BGC0001285	Pseudomonas	pseudopyronine a	2	268.204	46.53	4.6647	3	1	Other	Antibacterial	0	1	0	0	16	CCCCCCC1=C(O)CC(CCCCC)OC1=O
BGC0000238	Streptomyces	lactonamycin	1	569.153	178.36	0.9155	12	3	Polyketide		1	0	0	0	57	CO[C@]12CC(=O)O[C@]11C(=O)C3=C(O)C4=C5CN(C)C(=O)C5=C(O)C=C4C=C3C(=O)[C@@]1(CO2)O[C@H]1CC[C@H](O)[C@H](C)O1
BGC0001711	Burkholderia	occidiofungin a	1	1198.55	509.86	-6.0338	20	18	NRP		0	0	0	0	17	CCCCOC1CNC(=O)[C@H](CC(N)=O)NC(=O)[C@H](CO)NC(=O)[C@H](CC(N)=O)NC(=O)CNC(=O)[C@H](CCCCN)NC(=O)[C@@H](NC(=O)[C@H](CC2=CNC3=C2C=CC=C3)NC(=O)CC(C1)OC1OC[C@@H](O)[C@H](O)[C@H]1O)C(O)C1=CC=C(O)C=C1
BGC0000606	Streptomyces	lactazole	1	-1					RiPP		1	0	0	0	9
BGC0000484	Lactobacillus	glycocin f	1	-1					RiPP		1	0	0	0	8
BGC0001983	Kitasatospora	triacsins	1	-1					Other		1	0	0	0	32
BGC0000282	Streptomyces	alkylresorcinol	1	-1					Polyketide		1	0	0	0	3
BGC0001849	Streptomyces	thiovarsolin a	4	399.181	165.22	-2.11473	5	6	RiPP		1	0	0	0	6	O=C(C(C)[NH2+]C(C)=O)N1CCCC1C(NC(C(O)=O)/C=C/CNC(N)=N)=S
BGC0000946	Vibrio	vibrioferrin	1	434.117	239.07	-2.732	8	7	Other		0	0	0	1	5	C[C@@H](C(=O)NCCC(C(=O)O)C(CC(=O)O)(C(=O)O)O)N1C(=O)CC[C@]1(C(=O)O)O
BGC0000550	Streptococcus	salivaricin g32	1	-1					RiPP		1	0	0	0	5
BGC0000377	Bacillus	koranimine	1	803.495	207.19	2.6186	8	7	NRP		1	0	0	0	8	[H][C@]1(N=C[C@@H](NC(=O)[C@@H](CC2=CC=CC=C2)NC(=O)[C@@H](NC(=O)[C@@H](CC2=CC=CC=C2)NC(=O)[C@@H](CC(C)C)NC(=O)[C@@H](CC(C)C)NC1=O)C(C)C)C(C)C)[C@@H](C)O
BGC0000867	Ectothiorhodospira	polyhydroxyalkanoic acids	1	-1					Other		0	0	0	0	7
BGC0001357	Nostoc	carbamidocyclophane a	16	806.263	185.56	11.0038	8	6	Polyketide		0	0	0	0	13	C[C@H]1CCCCC(CCCC(Cl)Cl)C2=C(O)C=C(C=C2O)[C@H](OC(N)=O)[C@@H](C)CCCCC(CCCC(Cl)Cl)C2=C(O)C=C(C=C2O)[C@@H]1OC(N)=O
BGC0000521	Lactococcus	lacticin 481	1	2899.25	1126.12	-11.6456	41	38	RiPP		1	0	0	0	11	CCC(C)C(NC(=O)C(NC(=O)CNC(=O)C(CO)NC(=O)CNC(=O)CNC(=O)C(N)CCCCN)C(C)C)C(=O)NC(CC1=CNC=N1)C(=O)NC1C(C)SCC2NC(=O)C(CCC(O)=O)NC(=O)C(CC3=CNC=N3)NC(=O)C(CSCC3NC(=O)\C(NC(=O)C(CC4=CC=CC=C4)NC(=O)C(NC(=O)C(CC4=CC=CC=C4)NC(=O)C(CCC(N)=O)NC(=O)C(CC4=CNC5=C4C=CC=C5)NC(=O)C(CSCC(NC3=O)C(=O)NC(CO)C(O)=O)NC(=O)C(CC(N)=O)NC(=O)C(CCSC)NC(=O)C(CC(N)=O)NC2=O)C(C)C)=C\C)NC(=O)C(NC1=O)C(C)CC
BGC0001366	Streptomyces	be-24566b	2	460.152	116.45	4.45842	7	4	Polyketide		1	0	0	0	16	CC1=CC(O)=CC2=C1C1OC(C)(CC3=C1C(O)=C1C(=O)C4=C(C=C(O)C=C4O)C(C)(C)C1=C3)O2
BGC0000740	Streptococcus	capsular polysaccharide	1	1322.45	660.55	-16.7828	38	25	Saccharide		1	0	0	0	7	CC(=O)N[C@@H]1[C@H](C[C@@](O[C@H]1[C@@H]([C@@H](CO)O)O)(C(=O)O)O[C@H]2[C@H]([C@H](O[C@H]([C@@H]2O)O[C@@H]3[C@H](O[C@@H]([C@@H]([C@H]3O)NC(=O)C)OC[C@@H]4[C@H]([C@@H]([C@H]([C@H](O4)O[C@H]5[C@H](O[C@H]([C@@H]([C@H]5O[C@H]6[C@@H]([C@H]([C@@H]([C@H](O6)CO)O)O)O)O)O[C@@H]7[C@H](O[C@H]([C@@H]([C@H]7O)O)O)CO)CO)O)O)O)CO)CO)O)O
BGC0000391	Marinactinospora	methylpendolmycin	2	383.257	68.36	3.5156	3	3	NRP	Cytotoxic,Signalling	1	0	0	0	7	CC[C@H](C)[C@H]1C(=O)N[C@@H](CC2=CNC3=C(C=CC(=C23)N1C)C(C)(C)C=C)CO
BGC0000409	Streptomyces	porothramycin a	1	343.153	82.11	1.1819	5	2	NRP		1	0	0	0	34	COC1=CC=CC2=C1NC(O)C1CC(C=CC(=O)N(C)C)=CN1C2=O
BGC0001091	Corallococcus	corallopyronin	1	527.288	122.16	6.0405	7	3	NRP		0	0	0	0	16	C/C=C/C/C=C(\C)/C(CC/C(=C/C=C(\C)/C(=C\1/C(=O)C=C(OC1=O)[C@H](C)CC/C=C/NC(=O)OC)/O)/C)O
BGC0000285	Saccharopolyspora	flaviolin rhamnoside	3	352.079	153.75	-0.5806	9	5	Polyketide		1	0	0	0	9	O=C1C=C(O)C(C2=CC(O[C@H]3O[C@H](C)[C@@H](O)[C@H](O)[C@@H]3O)=CC(O)=C21)=O
BGC0000252	Streptomyces	nonactin	1	736.44	142.12	6.022	12	0	Polyketide		1	0	0	0	14	C[C@@H]1C[C@H]2CC[C@H](O2)[C@@H](C(=O)O[C@H](C[C@@H]3CC[C@@H](O3)[C@H](C(=O)O[C@@H](C[C@H]4CC[C@H](O4)[C@@H](C(=O)O[C@H](C[C@@H]5CC[C@@H](O5)[C@H](C(=O)O1)C)C)C)C)C)C)C
BGC0001292	Streptomyces	a33853	1	391.08	145.78	3.2515	7	4	Other		1	0	0	0	23	C1=CC(=C(C(=C1)O)NC(=O)C2=C(C=CC=N2)O)C3=NC4=C(C=CC=C4O3)C(=O)O
BGC0001522	Streptomyces	auroramycin	1	-1					Polyketide		1	0	0	0	67
BGC0001946	Burkholderia	lagriamide	1	-1					NRP		0	0	0	0	22
BGC0000079	Streptomyces	x-14547	1	493.319	79.39	6.849	3	2	Polyketide		1	0	0	0	23	CC[C@H]1CC[C@@H]2[C@@H]1C=C[C@H]([C@H]2C(=O)C3=CC=CN3)/C=C/C=C(\CC)/[C@H]4[C@H](CC[C@@H](O4)[C@@H](C)C(=O)O)C
BGC0001314	Arabidopsis	tirucalla	1	426.386	20.23	8.335	1	1	Terpene		3	0	0	0	21	C[C@@H](CCC=C(C)C)[C@@H]1CC[C@]2([C@]1(CC[C@H]3C2=CC[C@@H]4[C@@]3(CC[C@@H](C4(C)C)O)C)C)C
BGC0000256	Actinomadura	pradimicin-a	1	840.259	320.56	-0.61168	18	11	Polyketide		1	0	0	0	28	[H][C@](C)(NC(=O)C1=C(O)C2=C(C=C1C)[C@H](O[C@@H]1O[C@H](C)[C@H](NC)[C@H](O[C@@H]3OC[C@@H](O)[C@H](O)[C@H]3O)[C@H]1O)[C@@H](O)C1=CC3=C(C(O)=C21)C(=O)C1=C(C(O)=CC(OC)=C1)C3=O)C(O)=O
BGC0001075	Rhodococcus	aurachin re	1	395.246	62.46	5.47972	4	2	Terpene		1	0	0	0	11	CC(C)=CC(O)C\C(C)=C\CC\C(C)=C\CC1=C(C)N(O)C2=CC=CC=C2C1=O
BGC0001220	Aspergillus	aculeacin a	1	1035.57	368.19	-1.6626	16	14	NRP		2	0	0	0	1	CCCCCCCCCCCCCCCC(=O)N[C@H]1C[C@H]([C@H](NC(=O)[C@@H]2[C@H]([C@H](CN2C(=O)[C@@H](NC(=O)[C@@H](NC(=O)[C@@H]3C[C@H](CN3C(=O)[C@@H](NC1=O)[C@@H](C)O)O)[C@@H]([C@H](C4=CC=C(C=C4)O)O)O)[C@@H](C)O)C)O)O)O
BGC0001595	Fischerella	fischerindole	1	338.155	28.15	5.1855	1	1	Alkaloid		0	0	0	0	23	[C]=NC1C2c3c([nH]c4ccccc34)C(C)(C)C2CC(Cl)C1(C)C=C
BGC0001286	Ustilago	itaconic acid	1	130.027	74.6	0.1019	2	2	Other		2	0	0	0	7	C=C(CC(=O)O)C(=O)O
BGC0001103	Bacillus	mycosubtilin	1	1198.63	509.02	-4.0857	16	15	NRP		1	0	0	0	10	CCC(C)CCCCCCCCCCC1CC(=O)N[C@H](C(=O)N[C@H](C(=O)N2CCC[C@H]2C(=O)N[C@@H](C(=O)N[C@@H](C(=O)N[C@@H](C(=O)N[C@@H](C(=O)N[C@H](C(=O)N1)CC(=O)N)CO)CC(=O)N)CC(=O)N)CC3=CC=C(C=C3)O)CCC(=O)N)CC(=O)N
BGC0000233	Streptomyces	hedamycin	1	746.341	175.04	3.65582	13	3	Polyketide		1	0	0	0	32	CC1C(C(CC(O1)C2=CC(=C(C3=C2C(=O)C4=CC(=C5C(=O)C=C(OC5=C4C3=O)C6(C(O6)C7C(O7)C)C)C)O)C8CC(C(C(O8)C)O)(C)N(C)C)N(C)C)O
BGC0000190	Streptomyces	a-74528	1	560.132	205.96	2.9669	11	7	Polyketide		1	0	0	0	29	C[C@H]1[C@H](O)[C@H]2CC(O)=C3C(=O)C4=C(O)C=C(O)C=C4[C@H]4C(=O)C5=C([C@@H]2[C@@]34CC2=CC(O)=CC(=O)O2)C1=C(O)C=C5O
BGC0001239	Aspergillus	biotin	1	244.088	78.43	0.7968	3	3	Other		2	0	0	0	3	C1[C@H]2[C@@H]([C@@H](S1)CCCCC(=O)O)NC(=O)N2
BGC0000967	uncultured	calyculin a	4	1008.54	286.99	4.68898	16	8	NRP	Cytotoxic	3	0	0	0	25	C[C@H]1[C@@H](C[C@@]2(C([C@H]([C@H](O2)[C@H](C[C@@H]([C@H](C)[C@@H]([C@H](C)/C=C(\C)/C(=C/C=C/C(=C\C#N)/C)/C)O)O)OC)OP(=O)(O)O)(C)C)O[C@H]1C/C=C/C3=COC(=N3)[C@@H](C)CCNC(=O)[C@H]([C@H]([C@H](COC)N(C)C)O)O)O
BGC0001251	Epichloe	epichloenin a	1	-1					NRP		2	0	0	0	1
BGC0000539	Staphylococcus	nukacin isk-1	1	1177.58	494.95	-4.4507	19	16	RiPP		1	0	0	0	11	CCC(C)C(NC(=O)C(CC(O)=O)NC(=O)C(CCCCN)NC(=O)C(CCSC)NC(=O)C(NC(=O)C(CCCCN)NC(=O)C(CO)NC(=O)C(CC(N)=O)NC(=O)C(CCC(O)=O)NC(=O)C(N)CCSC)C(C)C)C=O
BGC0000700	Streptomyces	istamycin	1	318.227	138.01	-2.1424	8	5	Saccharide		1	0	0	0	67	CNC1C(CC(C(C1O)OC2C(CCC(O2)CN)N)N)OC
BGC0001726	Streptomyces	pactamides	1	-1					NRP		1	0	0	0	9
BGC0001998	Aspergillus	aspernidgulene a1	3	-1					Polyketide		2	0	0	0	4
BGC0000742	Streptococcus	capsular polysaccharide	1	1322.45	660.55	-16.7828	38	25	Saccharide		1	0	0	0	5	CC(=O)N[C@@H]1[C@H](C[C@@](O[C@H]1[C@@H]([C@@H](CO)O)O)(C(=O)O)O[C@H]2[C@H]([C@H](O[C@H]([C@@H]2O)O[C@@H]3[C@H](O[C@@H]([C@@H]([C@H]3O)NC(=O)C)OC[C@@H]4[C@H]([C@@H]([C@H]([C@H](O4)O[C@H]5[C@H](O[C@H]([C@@H]([C@H]5O[C@H]6[C@@H]([C@H]([C@@H]([C@H](O6)CO)O)O)O)O)O[C@@H]7[C@H](O[C@H]([C@@H]([C@H]7O)O)O)CO)CO)O)O)O)CO)CO)O)O
BGC0001054	Xenorhabdus	xenocoumacin 1	2	465.259	206.51	-0.8927	8	7	NRP	Antibacterial	0	1	0	0	14	CC(C)CC(C1CC2=C(C(=CC=C2)O)C(=O)O1)NC(=O)C(C(C(CCCN=C(N)N)N)O)O
BGC0001383	Jeotgalibacillus	macrolactin h	4	402.241	86.99	3.6922	5	3	Polyketide		1	0	0	0	9	CC1CCC\C=C/C=C/C(O)CC(O)C\C=C/C=C/C(O)C\C=C\C=C/C(=O)O1
BGC0000739	Pasteurella	capsular polysaccharide	1	-1					Saccharide		0	0	0	0	6
BGC0000830	uncultured	violacein	1	343.096	94.22	2.7501	3	4	Other	Cytotoxic	3	0	0	0	4	OC1=CC2=C(NC=C2C2=CC(C(=O)N2)=C2C(=O)NC3=C2C=CC=C3)C=C1
BGC0001330	Micromonospora	be-43547a1	7	563.357	142.11	3.1857	7	3	NRP	Cytotoxic	1	0	0	0	20	CC1C(OC(=O)CN(C(=O)/C=C/C(=C)NC(=O)CNC(=O)C(C1=O)(C)O)C)CCCCCCCCCCC(C)C
BGC0001379	Streptomyces	bd-12	1	486.219	235.16	-5.32903	10	8	NRP		1	0	0	0	28	[H][C@]12N\C(N[C@]1([H])C(=O)N(C)CC2O)=N/[C@@H]1OC(CO)[C@H](OC(N)=O)[C@H](O)C1N(C)C(=O)CNC=N
BGC0000444	Streptomyces	thaxtomin a	1	438.154	140.01	1.5545	6	3	NRP		1	0	0	0	12	[H][C@@]1(CC2=CNC3=CC=CC(=C23)N(=O)=O)N(C)C(=O)[C@](O)(CC2=CC=CC(O)=C2)N(C)C1=O
BGC0002026	Jahnella	thaxteramide a1	4	-1					NRP		0	0	0	0	15
BGC0001565	Beauveria	cyclosporin c	1	1217.84	299.03	2.2398	13	6	NRP		2	0	0	0	13	C/C=C/C[C@@H](C)[C@H]([C@H]1C(=O)N[C@H](C(=O)N(CC(=O)N([C@H](C(=O)N[C@H](C(=O)N([C@H](C(=O)N[C@H](C(=O)N[C@@H](C(=O)N([C@H](C(=O)N([C@H](C(=O)N([C@H](C(=O)N1C)C(C)C)C)CC(C)C)C)CC(C)C)C)C)C)CC(C)C)C)C(C)C)CC(C)C)C)C)[C@@H](C)O)O
BGC0000864	Moritella	eicosapentaenoic acid-like compound	1	-1					Other		0	0	0	0	22
BGC0000785	Burkholderia	o-antigen	1	-1					Saccharide		0	0	0	0	20
BGC0000269	Streptomyces	sf2575	1	777.263	258.67	3.027	15	6	Polyketide	Cytotoxic	1	0	0	0	46	C/C=C(\C)/C(=O)OC1C(OC(CC1O)C2=C(C3=C(C=C2)C(C4CC5C(C(=O)C(=C(C5(C(=O)C4=C3O)OC)O)C(=O)N)OC(=O)C6=CC=CC=C6O)(C)OC)O)C
BGC0000421	Pseudomonas	safracin a	2	524.263	134.43	0.89552	9	3	NRP		0	0	0	0	10	CC1=C(C(=C2[C@H]3[C@@H]4CC5=C([C@@H](N4C[C@H](N3C)CC2=C1)CNC(=O)[C@H](C)N)C(=O)C(=C(C5=O)C)OC)O)OC
BGC0001182	Chaetomium	chaetoglobosins	1	556.294	111.79	4.7835	5	3	NRP	Cytotoxic	2	0	0	0	7	CC[C@H]1[C@H]2[C@@H](NC(=O)[C@@]23[C@@H](/C=C/C[C@@H](/C=C(\[C@H](C(=O)/C=C/C3=O)O)/C)C)[C@H]4[C@@]1(O4)C)[C@@H](C)C5=CNC6=CC=CC=C65
BGC0000152	Aspergillus	sterigmatocystin	1	324.063	78.13	3.0064	6	1	Polyketide		2	0	0	0	17	COC1=C2C(=C3[C@@H]4C=CO[C@@H]4OC3=C1)OC5=C(C2=O)C(=CC=C5)O
BGC0000063	Fusarium	fumonisin	1	721.388	288.51	2.5642	12	8	Polyketide		2	0	0	0	17	CCCCC(C)C(C(CC(C)CC(CCCCC(CC(C(C)N)O)O)O)OC(=O)CC(CC(=O)O)C(=O)O)OC(=O)CC(CC(=O)O)C(=O)O
BGC0001004	Streptomyces	lobophorin b	1	1186.6	309.06	5.5729	21	6	Polyketide	Antibacterial,Cytotoxic	1	1	0	0	36	[H][C@@]12C=C[C@]3([H])C(C)=CCC(O[C@H]4C[C@](C)([C@H](NC(=O)OC)[C@H](C)O4)N(=O)=O)C(C)=C[C@@H]4C=C(CO)[C@@H](C)CC44OC(=O)C(=C4O)C(=O)[C@]3(C)[C@@]1([H])[C@H](C)C[C@@H](C)[C@H]2O[C@@H]1C[C@@H](O[C@@H]2C[C@@H](O)[C@@H](O[C@@H]3C[C@@H](O)[C@@H](OC)[C@H](C)O3)[C@H](C)O2)[C@@H](O)[C@H](C)O1
BGC0001143	Aspergillus	azanigerone a	1	362.137	106.97	2.3214	6	1	Polyketide		2	0	0	0	15	CCC(C)CC(C)C(=O)OC1(C(=O)C=C2C=C(OC=C2C1=O)C(=O)O)C
BGC0000994	Streptomyces	fr-900520	1	791.482	178.36	4.4729	12	3	NRP		1	0	0	0	22	[H][C@]12O[C@](O)([C@H](C)C[C@@H]1OC)C(=O)C(=O)N1CCCC[C@@]1([H])C(=O)O[C@@H]([C@H](C)[C@@H](O)CC(=O)[C@H](CC)\C=C(C)/C[C@H](C)C[C@@H]2OC)C(\C)=C\[C@@H]1CC[C@@H](O)C(C1)OC
BGC0001111	Stigmatella	rhizopodin	1	1468.87	334.18	9.8186	24	4	NRP	Cytotoxic	0	0	0	0	13	CO[C@@H](C[C@@H]1OC(=O)C[C@@H](O)C[C@@H](OC)C=CC=CC[C@H](OC)C2=COC(CC(O)C(C)(C)[C@H](C[C@H](OC)[C@@H](C)CCC(=O)[C@H](C)[C@@H](C\C=C\N(C)C=O)OC)OC(=O)C[C@@H](O)C[C@@H](OC)C=CC=CC[C@H](OC)C3=COC(CC(O)C1(C)C)=N3)=N2)[C@@H](C)CCC(=O)[C@H](C)[C@@H](C\C=C\N(C)C=O)OC
BGC0000420	Penicillium	histidyltryptophanyldiketopiperazine	7	-1					NRP		2	0	0	0	7
BGC0001060	Micromonospora	dynemicin a	1	537.106	165.92	2.1648	9	5	Polyketide		1	0	0	0	59	COC1=C([C@H](C)[C@@]23O[C@@]22[C@@H]1C#C\C=C/C#C[C@@H]3NC1=C2C=C(O)C2=C1C(=O)C1=C(C(O)=CC=C1O)C2=O)C(O)=O
BGC0000186	Burkholderia	thailandamide	2	717.424	153.39	7.2824	7	5	NRP		0	0	0	0	19	COC(C(C)C(O)=O)C(\C)=C\C=C\C=C(/C)\C=C\CC(O)CC(=O)\C=C\C=C(/C)\C=C\C(C)NC(=O)C(C)C\C=C\CC(O)CC1=CC=C(O)C=C1
BGC0000959	Aspergillus	aspyridone a	1	329.163	90.39	3.7081	4	3	NRP	Cytotoxic	2	0	0	0	9	CC[C@H](C)C[C@H](C)C(=O)C1=C(C(=CNC1=O)C2=CC=C(C=C2)O)O
BGC0001920	Streptomyces	siamycin i	1	-1					RiPP		1	0	0	0	25
BGC0001903	Streptomyces	neocarazostatin a	1	-1					Other		1	0	0	0	10
BGC0000565	Streptomyces	goadsporin	1	1611.66	565.73	2.99216	27	15	RiPP		1	0	0	0	16	CC[C@H](C)[C@H](NC(=O)C1=C(C)OC(=N1)C(=C)NC(=O)[C@@H](NC(=O)C1=C(C)OC(=N1)[C@H](C)NC(C)=O)C(C)C)C(=O)N[C@@H](CC(C)C)C1=NC(=CS1)C(=O)N[C@@H](CO)C(=O)NCC(=O)NCC1=NC(C(=O)N[C@@H](CC(C)C)C(=O)NC(=C)C2=NC(=CO2)C(=O)N[C@@H](C)C(=O)NCC2=NC(=CS2)C(=O)N[C@@H](C(C)C)C(O)=O)=C(C)O1
BGC0000807	Stackebrandtia	phosphonoglycans	1	-1					Saccharide		1	0	0	0	31
BGC0000036	Streptomyces	chlorothricin	2	940.365	223.04	6.56852	15	4	Polyketide	Antibacterial	1	1	0	0	43	C[C@@H](C(C(O)=O)=C1)C[C@@]2(C(O)=C(O3)C(O2)=O)[C@@H]1C=CCCCC[C@@H]4C=C[C@@]([C@@H](O[C@@H]5C[C@H](O)[C@@H](O[C@H]6O[C@@H](C)[C@H](O)[C@@H](OC(C7=C(C)C(Cl)=CC=C7OC)=O)C6)[C@@H](C)O5)CCC8)([H])[C@]8([H])[C@@H]4C3=O
BGC0001607	Streptomyces	gilvusmycin	1	702.244	184.29	4.31992	8	5	Other		1	0	0	0	25	COC1=C(O)C2=C(CCN2C(C)=O)C2=C1NC(=C2)C(=O)N1CCC2=C1C(O)=C(OC)C1=C2C=C(N1)C(=O)N1CC2CC22C1=CC(=O)C1=C2C(C)=CN1
BGC0001118	Aspergillus	endocrocin	1	314.043	132.13	1.58542	6	4	Polyketide	inhibits neutrophil recruitment, immunosuppressive	2	0	0	0	9	CC1=C(C(=C2C(=C1)C(=O)C3=CC(=CC(=C3C2=O)O)O)O)C(=O)O
BGC0001590	Streptomyces	formicamycins a-m	1	-1					Polyketide		1	0	0	0	43
BGC0000669	Arabidopsis	marneral	1	426.386	17.07	9.5537	1	0	Terpene		3	0	0	0	4	C[C@@H]1CCC(=C(C)C)[C@H]([C@]1(C)CC/C=C(\C)/CC/C=C(\C)/CCC=C(C)C)CCC=O
BGC0001619	Streptomyces	ibomycin	1	-1					Polyketide		1	0	0	0	40
BGC0001071	Nostoc	nosperin	1	541.3	191.88	-0.8462	9	6	Polyketide		0	0	0	0	13	C[C@@H]1[C@H](C)C(C[C@@]([C@H](O)C(N/C=C/C(CO)[C@@H](O)C(C)C(N2CCC[C@H]2[C@H](O)CC(N)=O)=O)=O)(OC)O1)=C
BGC0000536	Lactococcus	nisin q	1	-1					RiPP		1	0	0	0	11
BGC0000116	Pseudonocardia	nystatin-like pseudonocardia polyene	1	-1					Polyketide		1	0	0	0	23
BGC0001067	Aspergillus	fumagillin	3	458.23	97.89	3.9154	6	1	Polyketide	Inhibitor	2	0	0	0	15	[H][C@@]1([C@H](OC)[C@@H](CC[C@]11CO1)OC(=O)\C=C\C=C\C=C\C=C\C(O)=O)[C@@]1(C)O[C@@H]1CC=C(C)C
BGC0000023	Stigmatella	aurafuron a	1	378.241	86.99	3.421	5	3	Polyketide	Antifungal,Cytotoxic	0	0	1	0	14	CC(C)C\C=C(/C)[C@H](O)[C@H](C)\C=C\C=C/[C@@H](O)CC1=C(C)C(=O)C(C)(O)O1
BGC0000559	Bacillus	subtilin	1	3318.56	1217.05	-9.1592	45	40	RiPP	Antibacterial,Signalling	1	1	0	0	13	NC(CC1=CNC2=C1C=CC=C2)C(NC(CCCCN)C(NC(CSCC(C(NC(C5C)C(N4C(C(NC([H])C(NC(CS5)C(NC(C(C)C)C(NC(C6C)C(NC([H])C(NC(C)C(NC(CC(C)C)C(NC(CCC(N)=O)C(NC(C(NC(CS6)C(NC(CC7=CC=CC=C7)C(NC(CC(C)C)C(NC(CCC(N)=O)C(NC(C8C)C(NC(CC(C)C)C(NC(C9C)C(NC(CS8)C(NC(CC(N)=O)C(NC(CS9)C(NC(CCCCN)C(NC(C(CC)C)C(NC(C(NC(CCCCN)C(O)=O)=O)=C)=O)=O)=O)=O)=O)=O)=O)=O)=O)=O)=O)=O)=O)=CC)=O)=O)=O)=O)=O)=O)=O)=O)=O)CCC4)=O)=O)NC3=O)C(N…
BGC0001469	Brevibacillus	marthiapeptide a	1	665.137	138.33	4.7013	11	3	NRP	Antibacterial	1	1	0	0	12	[H][C@@]12CSC(=N1)C1=CSC(=N1)C1=CSC(=N1)C1=CSC(=N1)[C@@H](C)NC(=O)[C@@]([H])(NC(=O)[C@@H](CC1=CC=CC=C1)NC2=O)[C@@H](C)CC
BGC0001548	Streptomyces	citrulassin a	1	1564.89	661.35	-6.7635	21	22	RiPP		1	0	0	0	4	C[C@H]1C(=O)NCC(=O)N[C@H](C(=O)N[C@@H](CC(=O)N[C@H](C(=O)N[C@H](C(=O)NCC(=O)N[C@H](C(=O)N1)CC(C)C)CC(C)C)CC(C)C)C(=O)N[C@@H](CCCNC(=O)N)C(=O)N[C@@H](CC(C)C)C(=O)N[C@@H](C(C)C)C(=O)N[C@@H](CC(C)C)C(=O)N[C@@H](CO)C(=O)N[C@@H](CCCCN)C(=O)N[C@@H](CC(=O)N)C(=O)O)CC(=O)N
BGC0000353	Streptomyces	tacrolimus	1	803.482	178.36	4.639	12	3	NRP		1	0	0	0	3	[H][C@]1(CC[C@@H](O)[C@@H](C1)OC)\C=C(/C)[C@@H]1OC(=O)[C@]2([H])CCCCN2C(=O)C(=O)[C@]2(O)O[C@@]([H])([C@H](C[C@H]2C)OC)[C@H](C[C@@H](C)C\C(C)=C\[C@@H](CC=C)C(=O)C[C@H](O)[C@H]1C)OC
BGC0000141	Streptomyces	rubradirin	1	998.271	349.02	3.34162	22	6	Polyketide		1	0	0	0	58	CC1/C=C(/C(=O)C2=C3C(=CC(=C2O)C)C(=O)C4=C(C3=O)OC(CN4)(C(=O)C(C1OC(=O)C5=C(C(=CC(=N5)C(=O)NC6=C(OC7=C(C6=O)C=CC(=C7)OC)O)OC8CC(C(C(O8)C)OC)(C)[N+](=O)[O-])O)O)C)\C
BGC0000869	Nostoc	heterocyst glycolipids	1	-1					Other		0	0	0	0	7
BGC0000920	Bacillus	polyhydroxyalkanoates	1	-1					Other		1	0	0	0	2
BGC0001872	Xenorhabdus	fabclavine-polyamine	1	597.628	150.33	7.948	6	6	Polyketide	Antibacterial	0	1	0	0	10	NCCC(O)CCCCCCCC(N)CCCCCCCC(N)CCCCCCCC(N)CCCCCCCC(C)N
BGC0000754	Avibacterium	capsular polysaccharide	1	-1					Saccharide		0	0	0	0	6
BGC0000446	Klebsiella	tilivalline	5	333.148	68.36	3.6449	3	3	NRP	Cytotoxic	0	0	0	0	19	C1C[C@H]2[C@@H](NC3=C(C=CC=C3O)C(=O)N2C1)C4=CNC5=CC=CC=C54
BGC0001144	Trichophyton	neosartoricin b	1	442.464	155.52	2.7171	8	6	Polyketide		2	0	0	0	5	C/C(C)=C\CC1=C2C=C(O)C=C(O)C2=C(O)C3=C1C[C@](CC(/C=C(C)\O)=O)(O)[C@H](O)C3=O
BGC0000895	Lactobacillus	citrulline	1	175.096	118.44	-1.1532	3	4	Other		1	0	0	0	11	C(C[C@@H](C(=O)O)N)CNC(=O)N
BGC0001110	uncultured	psymberin	2	609.315	184.24	1.85022	11	6	NRP	Cytotoxic	3	0	0	0	19	CC1=C(C=C(C2=C1C[C@@H](OC2=O)[C@H](C)[C@H](C[C@@H]3C([C@@H](C[C@H](O3)[C@@H](NC(=O)[C@H](C(CC(=C)C)OC)O)OC)O)(C)C)O)O)O
BGC0000223	uncultured	rabelomycin	5	338.079	111.9	1.7531	6	3	Polyketide	Antibacterial	3	1	0	0	65	C[C@@]1(O)CC(=O)C2=C3C(=O)C4=C(C(O)=CC=C4)C(=O)C3=C(O)C=C2C1
BGC0001742	Candidatus	piericidin a1	1	415.272	71.81	5.45742	5	2	Polyketide		0	0	0	0	12	OC1=C(C)C(C/C=C(C)/C/C=C/C(C)=C/[C@@H](C)[C@H](/C(C)=C/C)O)=NC(OC)=C1OC
BGC0000419	Amycolatopsis	ristomycin a	1	2066.66	816.22	-6.50138	46	29	NRP	Antibacterial	1	1	0	0	39	CC1C(C(CC(O1)OC2C3C(=O)NC(C4=CC(=CC(=C4C5=C(C=CC(=C5)C(C(=O)N3)NC(=O)C6C7=CC(=C(C(=C7)OC8=CC=C2C=C8)OC9C(C(C(C(O9)COC1C(C(C(C(O1)C)O)O)O)O)O)OC1C(C(C(C(O1)CO)O)O)OC1C(C(C(CO1)O)O)O)OC1=CC=C(C=C1)C(C1C(=O)NC(C2=CC(=C(C(=C2)O)C)OC2=C(C=CC(=C2)C(C(=O)N1)N)O)C(=O)N6)O)O)OC1C(C(C(C(O1)CO)O)O)O)O)C(=O)OC)N)O
BGC0000362	Mycobacterium	glycopeptidolipid	1	1602.99	446.8	5.6551	25	12	NRP		1	0	0	0	39	CCCCCCCCCCCCCCCCCCCCCCCCCCCCCC(CC(=O)N[C@H](CC1=CC=CC=C1)C(=O)N[C@H]([C@@H](C)OC2[C@@H]([C@@H]([C@@H]([C@@H](O2)C)O)O)O[C@H]3[C@@H]([C@@H]([C@H]([C@@H](O3)C)O)O[C@H]4[C@@H]([C@H]([C@H]5[C@H](O4)CO[C@](O5)(C)C(=O)O)OC)O)O)C(=O)N[C@H](C)C(=O)N[C@@H](C)COC6[C@@H]([C@@H]([C@H]([C@@H](O6)C)OC)OC)O)O.O
BGC0000290	Streptomyces	a-47934	1	1311.14	450.59	5.1142	20	15	NRP		1	0	0	0	34	N[C@@H]1C2=CC=C(OS(O)(=O)=O)C(OC3=CC(=CC(O)=C3)[C@@H]3NC(=O)[C@@H](CC4=CC(Cl)=C(OC5=C(O)C6=CC(=C5)[C@@H](NC3=O)C(=O)N[C@@H]3C5=CC(Cl)=C(O)C(=C5)C5=C(O)C=C(O)C=C5[C@H](NC(=O)[C@@H](NC3=O)[C@H](O)C3=CC=C(O6)C(Cl)=C3)C(O)=O)C=C4)NC1=O)=C2
BGC0000761	Methylobacillus	exopolysaccharide	1	-1					Saccharide		0	0	0	0	24
BGC0001934	Streptomyces	armeniaspirols	1	-1					Polyketide		1	0	0	0	29
BGC0000497	Streptococcus	bht-aα	2	-1					RiPP		1	0	0	0	8
BGC0001873	Xenorhabdus	pyrrolizixenamide a	1	236.152	49.41	1.5714	3	1	NRP		0	0	0	0	2	O=C1C=C(NC(=O)CCCCC)N2CCCC12
BGC0000795	Aneurinibacillus	s-layer glycan	1	-1					Saccharide		1	0	0	0	24
BGC0001592	Streptomyces	ferroverdin	1	883.108	236.37	6.0624	15	0	Other		1	0	0	0	17	C=CC1=CC=C(C=C1)OC(=O)C2=CC(=C(C=C2)[O-])N=O.C=CC1=CC=C(C=C1)OC(=O)C2=CC(=C(C=C2)[O-])N=O.C=CC1=CC=C(C=C1)OC(=O)C2=CC(=C(C=C2)[O-])N=O.[Na+].[Fe+2]
BGC0001508	Penicillium	andrastin a	1	486.262	106.97	4.4962	7	1	Polyketide		2	0	0	0	10	[H][C@]12CC[C@@]3(C)[C@@]([H])(C=C(C)[C@@]4(C)C(=O)C(C)=C(O)[C@@]34C(=O)OC)[C@@]1(CC[C@H](OC(C)=O)C2(C)C)C=O
BGC0001705	Nostoc	nodularin	1	824.443	284.94	0.9729	9	8	NRP		0	0	0	0	9	C/C=C\1/C(=O)N[C@H]([C@H](C(=O)N[C@@H](C(=O)N[C@@H]([C@@H](C(=O)N[C@H](CCC(=O)N1C)C(=O)O)C)/C=C/C(=C/[C@H](C)[C@H](CC2=CC=CC=C2)OC)/C)CCCN=C(N)N)C)C(=O)O
BGC0001460	Amycolatopsis	decaplanin	1	1559.53	589.41	-1.6954	29	21	NRP	Antibacterial	1	1	0	0	36	CC1C(C(C(C(O1)OC2C(C(C(OC2OC3=C4C=C5C=C3OC6=C(C=C(C=C6)C(C(C(=O)NC(C(=O)NC5C(=O)NC7C8=CC(=C(C=C8)O)C9=C(C=C(C=C9C(NC(=O)C(C(C1=CC=C(O4)C=C1)OC1CC(C(C(O1)C)O)(C)N)NC7=O)C(=O)O)O)O)CC(=O)N)NC(=O)C(CC(C)C)NC)O)Cl)CO)O)O)O)O)O
BGC0001767	Salinispora	salinichelins	1	-1					NRP		1	0	0	1	13
BGC0000939	Grimontia	aerobactin	1	564.228	271.41	-1.4629	10	8	Other		0	0	0	1	9	CC(=O)N(CCCC[C@@H](C(=O)O)NC(=O)CC(CC(=O)N[C@@H](CCCCN(C(=O)C)O)C(=O)O)(C(=O)O)O)O
BGC0000396	Nostoc	nodularin	1	824.443	282.44	1.18257	9	9	NRP		0	0	0	0	4	CO[C@@H](CC1=CC=CC=C1)[C@@H](C)\C=C(/C)\C=C\[C@@H]1NC(=O)[C@H](CCCNC(N)=N)NC(=O)[C@@H](C)[C@@H](NC(=O)\C(=C\C)N(C)C(=O)CC[C@@H](NC(=O)[C@H]1C)C(O)=O)C(O)=O
BGC0000278	Streptomyces	urdamycin	1	890.339	257.43	2.1775	18	7	Polyketide		1	0	0	0	5	C[C@H]1[C@H](CC[C@@H](O1)O[C@]23C(=O)C[C@](C[C@]2(C(=CC4=C3C(=O)C5=C(C4=O)C(=C(C=C5)[C@H]6C[C@H]([C@@H]([C@H](O6)C)O)O[C@H]7CC[C@@H]([C@@H](O7)C)O[C@H]8C[C@H]([C@@H]([C@H](O8)C)O)O)O)SC)O)(C)O)O
BGC0000881	Streptomyces	toyocamycin	1	291.097	150.44	-1.50332	9	4	Other		1	0	0	0	10	C1=C(C2=C(N1[C@H]3[C@@H]([C@@H]([C@H](O3)CO)O)O)N=CN=C2N)C#N
BGC0000236	Streptomyces	kinamycin	1	496.112	187.64	-0.71302	11	2	Polyketide		1	0	0	0	35	CC(=O)O[C@@H]1[C@H](C2=C([C@H]([C@@]1(C)OC(=O)C)OC(=O)C)C(=C3C2=C(C4=CC=CC(=O)C4=C3O)[O-])[N+]#N)O
BGC0001802	Streptomyces	thioholgamide a	2	1305.49	327.03	0.138	17	13	RiPP		1	0	0	0	11	C(C(C)=O)(NC(C(C)C)C(NC(CCSC)C(NC(C(NC(C(NC(C(NC(C(NC1C(=O)NC(C(NC(C)C(=O)NC(CC2C=CC=CC=2)C(NC(C(O)C2N(C)C=[N+](C)C=2)C(=O)NC=CSC1C)=O)=O)C(C)C)=O)C)=S)C)=S)C)=O)C)=S)=S)=O
BGC0000193	Streptomyces	aclacinomycin	1	811.342	217.05	3.1577	16	4	Polyketide		1	0	0	0	13	CC[C@]1(C[C@@H](C2=C([C@H]1C(=O)OC)C=C3C(=C2O)C(=O)C4=C(C3=O)C=CC=C4O)OC5CC(C(C(O5)C)OC6CC(C(C(O6)C)OC7CCC(=O)C(O7)C)O)N(C)C)O
BGC0001623	Streptomyces	ishigamide	1	-1					NRP		1	0	0	0	18
BGC0000441	Actinoplanes	teicoplanin	1	1197.22	407.22	4.9848	18	15	NRP		1	0	0	0	49	C1[C@@H]2C(=O)N[C@@H](C3=CC(=CC(=C3)O)OC4=C(C=CC(=C4)[C@H](C(=O)N2)N)O)C(=O)N[C@@H]5C6=CC(=C(C(=C6)OC7=C(C=C(C=C7)[C@H]([C@H]8C(=O)NC(C9=CC(=CC(=C9C2=C(C=CC(=C2)[C@H](C(=O)N8)NC5=O)O)O)O)C(=O)O)O)Cl)O)OC2=C(C=C1C=C2)Cl
BGC0000418	Amycolatopsis	ristocetin	1	2066.66	816.22	-6.50138	46	29	NRP		1	0	0	0	39	CC1C(C(CC(O1)OC2C3C(=O)NC(C4=CC(=CC(=C4C5=C(C=CC(=C5)C(C(=O)N3)NC(=O)C6C7=CC(=C(C(=C7)OC8=CC=C2C=C8)OC9C(C(C(C(O9)COC1C(C(C(C(O1)C)O)O)O)O)O)OC1C(C(C(C(O1)CO)O)O)OC1C(C(C(CO1)O)O)O)OC1=CC=C(C=C1)C(C1C(=O)NC(C2=CC(=C(C(=C2)O)C)OC2=C(C=CC(=C2)C(C(=O)N1)N)O)C(=O)N6)O)O)OC1C(C(C(C(O1)CO)O)O)O)O)C(=O)OC)N)O
BGC0001947	Acinetobacter	k53 capsular polysaccharide	1	-1					Saccharide		0	0	0	0	19
BGC0001630	uncultured	kasumigamide	1	786.37	292.08	0.10717	9	12	NRP		3	0	0	0	11	NC(=N)NCCC[C@@H](NC(=O)C[C@H](O)[C@@H](CC1=CNC2=CC=CC=C12)NC(=O)CCNC(=O)[C@H](O)CC1=CC=CC=C1)C(=O)N[C@H]([C@H](O)C1=CC=CC=C1)C(O)=O
BGC0000973	Streptomyces	collismycin a	1	275.073	63.58	2.8545	6	1	NRP	Neuroprotectant	1	0	0	0	27	COC1=C(/C(=C\N=O)/NC(=C1)C2=CC=CC=N2)SC
BGC0000915	Streptomyces	mitomycin	1	334.128	146.89	-1.6512	8	3	Other	Cytotoxic	1	0	0	0	55	CC1=C(C(=O)C2=C(C1=O)N3C[C@H]4[C@@H]([C@@]3([C@@H]2COC(=O)N)OC)N4)N
BGC0001535	Streptomyces	branched-chain fatty acids	1	-1					Other		1	0	0	0	3
BGC0001387	Streptomyces	nucleocidin	1	364.06	188.7	-2.455	11	4	Other		1	0	0	0	23	NC1=NC=NC2=C1N=CN2[C@@H]1O[C@](F)(COS(N)(=O)=O)[C@@H](O)[C@H]1O
BGC0001395	Actinoplanes	teichomycin	1	1877.56	662.41	1.1636	33	24	Other		1	0	0	0	18	CCCCCCCCCC(=O)N[C@@H]1[C@H]([C@@H]([C@H](O[C@H]1OC2=C3C=C4C=C2OC5=C(C=C(C=C5)[C@H]([C@H]6C(=O)N[C@H](C7=CC(=CC(=C7C8=C(C=CC(=C8)[C@H](C(=O)N6)NC(=O)[C@@H]4NC(=O)[C@@H]9C1=CC(=CC(=C1)O)OC1=C(C=CC(=C1)[C@H](C(=O)N[C@H](CC1=CC(=C(O3)C=C1)Cl)C(=O)N9)N)O)O)O[C@@H]1[C@H]([C@H]([C@@H]([C@H](O1)CO)O)O)O)O)C(=O)O)O[C@H]1[C@@H]([C@H]([C@@H]([C@H](O1)CO)O)O)NC(=O)C)Cl)CO)O)O
BGC0001318	Manihot	linamarin	2	247.106	123.17	-1.89492	7	4	Other		3	0	0	0	16	CC(C)(C#N)O[C@H]1[C@@H]([C@H]([C@@H]([C@H](O1)CO)O)O)O
BGC0000356	Aspergillus	verruculogen	7	511.232	113.7	2.8551	8	2	NRP	Inhibitor	2	0	0	0	9	C/C(C)=C/[C@@H]1N2C3=C(C4=C2[C@@H](N5C([C@]6([H])CCCN6C([C@]5(O)[C@H]4O)=O)=O)CC(C)(C)OO1)C=CC(OC)=C3
BGC0001267	Claviceps	lysergic acid	2	268.121	56.33	2.1222	2	2	Terpene		2	0	0	0	13	CN1C[C@@H](C=C2[C@H]1CC3=CNC4=CC=CC2=C34)C(=O)O
BGC0000184	Sorangium	sorangicin a	1	806.461	161.21	6.7977	10	4	Polyketide	Antibacterial	0	1	0	0	23	CC(CCCCC(O)=O)\C=C(/C)C1OC2C\C=C\CC\C=C\C(O)C(O)[C@H]3C[C@H](O)C(C)C(C\C=C\[C@@H]4O[C@@H]5C[C@@H](O[C@@H]5\C=C\C=C/C=C\C(=O)OC1C=C2)[C@H]4C)O3
BGC0000842	Streptomyces	carbapenem mm4550	1	407.023	199.26	-2.4686	9	2	Other	Antibacterial	1	1	0	0	29	C[C@H](OS(=O)([O-])=O)[C@]([C@]1([H])N2C(C(O)=O)=C([S+]([O-])/C=C/NC([O-])=O)C1)([H])C2=O
BGC0000382	Streptomyces	lipstatin	1	491.361	81.7	6.4339	5	1	NRP		1	0	0	0	14	CCCCCC[C@H]1[C@H](C[C@H](C\C=C/C\C=C/CCCCC)OC(=O)[C@H](CC(C)C)NC=O)OC1=O
BGC0001511	Actinosynnema	ansamitocin p-3	1	634.266	136.16	4.3236	9	2	Polyketide		1	0	0	0	42	C[C@@H]1[C@@H]2C[C@]([C@@H](/C=C/C=C(/CC3=CC(=C(C(=C3)OC)Cl)N(C(=O)C[C@@H]([C@]4([C@H]1O4)C)OC(=O)C(C)C)C)\C)OC)(NC(=O)O2)O
BGC0000511	Bacillus	ericin s	1	3341.54	1219.71	-9.0764	45	40	RiPP	Antibacterial,Signalling	1	1	0	0	17	NC(CC1=CNC2=C1C=CC=C2)C(NC(CCCCN)C(NC(CSCC(C(NC(C5C)C(N4C(C(NC([H])C(NC(CS5)C(NC(C(C)C)C(NC(C6C)C(NC([H])C(NC(C(C)C)C(NC(CC(C)C)C(NC(CCC(N)=O)C(NC(C(NC(CS6)C(NC(CC7=CC=CC=C7)C(NC(CC(C)C)C(NC(CCC(N)=O)C(NC(C8C)C(NC(C(CC)C)C(NC(C9C)C(NC(CS8)C(NC(CC(N)=O)C(NC(CS9)C(NC(CC%10=CNC=N%10)C(NC(C(CC)C)C(NC(C(NC(CCCCN)C(O)=O)=O)=C)=O)=O)=O)=O)=O)=O)=O)=O)=O)=O)=O)=O)=O)=CC)=O)=O)=O)=O)=O)=O)=O)=O)=O)CCC4)=O…
BGC0000440	Actinoplanes	teicoplanin	1	1197.22	407.22	4.9848	18	15	NRP	Antibacterial	1	1	0	0	53	C1[C@@H]2C(=O)N[C@@H](C3=CC(=CC(=C3)O)OC4=C(C=CC(=C4)[C@H](C(=O)N2)N)O)C(=O)N[C@@H]5C6=CC(=C(C(=C6)OC7=C(C=C(C=C7)[C@H]([C@H]8C(=O)NC(C9=CC(=CC(=C9C2=C(C=CC(=C2)[C@H](C(=O)N8)NC5=O)O)O)O)C(=O)O)O)Cl)O)OC2=C(C=C1C=C2)Cl
BGC0000815	Epichloe	loline	1	154.111	24.5	-0.5703	3	1	Alkaloid		2	0	0	0	9	CN[C@H]1[C@H]2CN3[C@@H]1[C@@H](O2)CC3
BGC0001041	Salinispora	salinosporamide a	1	313.108	75.63	1.1328	4	2	NRP	Cytotoxic	1	0	0	0	31	[H][C@](O)([C@@]1([H])CCCC=C1)[C@@]12NC(=O)[C@H](CCCl)[C@]1(C)OC2=O
BGC0001475	Aspergillus	aspterric acid	1	266.152	66.76	2.1176	3	2	Polyketide		2	0	0	0	4	CC(=C1CCC23C1CCC(C(C2)OC3)(C(=O)O)O)C
BGC0000812	Shiraia	huperzine a	1	242.142	59.14	2.4098	3	2	Alkaloid		2	0	0	0	13	CC=C1C2CC3=C(C=CC(O)=N3)C1(N)CC(C)=C2
BGC0000227	Streptomyces	granaticin	1	444.106	159.82	0.2882	10	4	Polyketide	Antibacterial	1	1	0	0	37	C[C@@H]1[C@]2(c3c(c(c4c(c3O)C(=O)C5=C(C4=O)[C@H]6[C@H](CC(=O)O6)OC5C)O)[C@@H](O1)C[C@H]2O)O
BGC0000345	Streptomyces	eponemycin	1	398.242	128.26	0.4613	6	4	NRP	Cytotoxic,Inhibitor	1	0	0	0	14	CC(C)CCCCC(=O)NC(CO)C(=O)N[C@@H](CC(=C)C)C(=O)[C@]1(CO1)CO
BGC0001735	Streptomyces	pentostatine	2	268.117	112.13	-0.989	8	4	Other		1	0	0	0	32	C1[C@@H]([C@H](O[C@H]1N2C=NC3=C2NC=NC[C@H]3O)CO)O
BGC0001758	Paraburkholderia	rhizomide a	3	-1					NRP		0	0	0	0	1
BGC0001614	Planktothrix	hassallidin e	1	1409.72	566.12	-5.3275	24	19	NRP		0	0	0	0	16	C/C=C1NC(C(NC(C(NC(C(C(OC(C(NC(C(N(C(CNC(C(NC\1=O)CCC(N)=O)=O)=O)C)C(OC2OC(C(C(C2O)O)O)CO)C)=O)CCC(N)=O)=O)C)NC(C(C(O)C)NC(C(C(CCCCCCCCCCCCC)O)O)=O)=O)=O)C(O)C)=O)Cc3ccc(O)cc3)=O
BGC0001663	Nostoc	merocyclophane c	2	568.413	101.15	9.8508	5	5	Polyketide		0	0	0	0	9	CCCC[C@@H]1CCCCC[C@H](C2=CC(=C([C@H](CCCCC[C@H](C3=CC(=C1C(=C3)O)O)C)CCCCO)C(=C2)O)O)C
BGC0001646	Burkholderia	lagriamide	1	-1					Polyketide		0	0	0	0	22
BGC0001484	Actinomadura	2'-chloropentostatin	2	566.175	246.46	-2.3852	17	7	Other		1	0	0	0	31	C1[C@H](C2=C(NC=N1)N(C=N2)[C@H]3[C@@H]([C@@H]([C@H](O3)CO)O)Cl)O/C1=NC2=C(C(=N1)N)N=CN2[C@H]3[C@@H]([C@@H]([C@H](O3)CO)O)N
BGC0000626	Bacillus	thuricin	1	-1					RiPP		1	0	0	0	6
BGC0000260	Hahella	prodigiosin	1	323.2	53.17	2.97012	2	2	Polyketide		0	0	0	0	26	CCCCCC1=C(NC(=C1)/C=C\2/C(=C/C(=C/3\C=CC=N3)/N2)OC)C
BGC0001336	uncultured	erdasporine a	3	369.111	86.98	3.9131	3	3	Alkaloid	Cytotoxic	3	0	0	0	7	O=C1C2=C(C(C(OC)=O)N1)C3=C(C4=C2C5=CC=CC=C5N4)NC6=CC=CC=C63
BGC0000434	Streptomyces	sw-163c	5	1112.37	316.48	0.7236	18	6	NRP		1	0	0	0	28	CC1CC11N(C)C(=O)C2CSSCC(N(C)C(=O)C(C)NC(=O)C(COC1=O)NC(=O)C1=NC3=C(C=CC=C3)C=C1O)C(=O)N(C)C1(CC1C)C(=O)OCC(NC(=O)C1=NC3=C(C=CC=C3)C=C1O)C(=O)NC(C)C(=O)N2C
BGC0001748	Nostoc	pseudospumigin a	6	-1					NRP		0	0	0	0	3
BGC0001938	Candidatus	entotheonella	1	-1					Polyketide		0	0	0	0	2
BGC0000894	Monascus	citrinin	1	250.084	83.83	1.721	4	2	Other		2	0	0	0	7	C[C@@H]1OC=C2C(O)=C(C(O)=O)C(=O)C(C)=C2[C@H]1C
BGC0001775	Cordana	sespendole	1	519.335	85.85	6.2377	4	3	Terpene		2	0	0	0	6	[H][C@]12CC3=C(NC4=CC=C([C@H](O)C5OC5(C)C)C(CC=C(C)C)=C34)[C@]1(C)[C@@]1(C)CCC(=O)C(C)(C)[C@]1(O)CC2
BGC0001573	Claviceps	dihydrolysergic acid	1	270.137	56.33	2.2125	2	2	Alkaloid		2	0	0	0	6	CN1CC(CC2C1CC3=CNC4=CC=CC2=C34)C(=O)O
BGC0002032	Streptomyces	pentamycin	1	-1					Polyketide		1	0	0	0	15
BGC0001384	Streptomyces	saprolmycin e	1	820.294	230.88	2.4844	16	4	Polyketide		1	0	0	0	36	C[C@@H]1OC(CC[C@@H]1O[C@@H]1O[C@@H](C)C(=O)C=C1)O[C@@H]1[C@@H](C)O[C@H](C[C@H]1O)C1=C(O)C2=C(C=C1)C(=O)C1=C(C=C[C@]3(O)C[C@@](C)(CC(=O)[C@]13O)O[C@@H]1O[C@@H](C)C(=O)C=C1)C2=O
BGC0000616	Bacillus	amylocyclicin	1	6381					RiPP	Antibacterial	1	1	0	0	6
BGC0000068	Streptomyces	geldanamycin	1	560.273	163.48	2.4084	9	3	Polyketide		1	0	0	0	13	C[C@H]1C[C@@H]([C@@H]([C@H](/C=C(/[C@@H]([C@H](/C=C\C=C(\C(=O)NC2=CC(=O)C(=C(C1)C2=O)OC)/C)OC)OC(=O)N)\C)C)O)OC
BGC0000951	Streptomyces	pacidamycin 1	8	874.361	332.4	-1.2491	13	11	NRP		1	0	0	0	22	O[C@@H]([C@H](N1C(NC(C=C1)=O)=O)O/2)CC2=C\NC([C@@H](NC([C@H](C)NC(N[C@@H](CC3=CNC4=C3C=CC=C4)C(O)=O)=O)=O)[C@@H](N(C)C([C@H](CC5=CC=CC(O)=C5)NC([C@@H](N)C)=O)=O)C)=O
BGC0000925	Pseudomonas	quinolobactin	1	219.053	79.65	1.6472	4	2	Other		0	0	0	1	15	COC1=CC(=NC2=C(O)C=CC=C12)C(O)=O
BGC0000996	Streptomyces	frontalamide b	1	508.257	132.8	2.165	6	4	NRP	Antifungal	1	0	1	0	7	O=C(NCCC(O)C1C(O)=C(C(/C=C/2)=O)C(N1)=O)/C=C\C[C@H]([C@]3([H])[C@]4([H])[C@@]5([H])[C@@](C[C@H](C=C)[C@@H]5C)([H])C3)[C@H]2CC4=O
BGC0000558	Bacillus	sublancin 168	1	-1					RiPP		1	0	0	0	3
BGC0001994	Streptomyces	β-ethynylserine	1	-1					Other		1	0	0	0	6
BGC0001037	Aspergillus	pseurotin	2	431.158	142.39	0.0028	8	4	NRP	Inhibitor	2	0	0	0	5	CC\C=C/[C@H](O)[C@H](O)C1=C(C)C(=O)[C@@]2(O1)C(O)[C@](NC2=O)(OC)C(=O)C1=CC=CC=C1
BGC0000486	Butyrivibrio	butyrivibriocin ar10	1	-1					RiPP		1	0	0	0	8
BGC0001221	Streptomyces	marinophenazine a	2	364.179	69.29	4.7985	4	1	Other	Cytotoxic	1	0	0	0	26	C/C(=C\COc1cccc2c1nc1cccc(c1[n+]2[O-])O)/CCC=C(C)C
BGC0000806	Glycomyces	phosphonoglycans	1	-1					Saccharide		1	0	0	0	55
BGC0001553	Streptomyces	clifednamide a	1	492.262	112.57	3.1942	5	3	NRP		1	0	0	0	10	C[C@@H]1C[C@@H]2[C@H]3C[C@H]4/C=C/C(=C5C(=O)[C@H](CCCNC(=O)/C=C/C[C@@H]4[C@H]3C=C[C@H]2[C@@H]1C(=O)C)NC5=O)O
BGC0001895	Streptomyces	huanglongmycin a	3	-1					Polyketide		1	0	0	0	20
BGC0001021	Mycobacterium	mycobactin	1	591.254	203.91	-0.4059	11	5	NRP		1	0	0	1	10	C1CCN(C(=O)C(C1)NC(=O)CCOC(=O)C(CCCCCN(C=O)O)NC(=O)C2CO/C(=C\3/C=CC=CC3=O)/N2)O
BGC0000465	Xenorhabdus	xenortide a	4	409.273	61.44	3.0491	3	2	NRP	Cytotoxic	0	0	0	0	2	CN[C@@H](CC(C)C)C(=O)N(C)[C@@H](CC1=CC=CC=C1)C(=O)NCCC1=CC=CC=C1
BGC0000586	Klebsiella	microcin e492	1	-1					RiPP		0	0	0	0	16
BGC0000580	Xanthomonas	xanthomonin i	2	-1					RiPP		0	0	0	0	4
BGC0001842	Pseudomonas	gacamide a	1	1393.84	510.34	-0.7379	18	16	NRP	Antibacterial,Surfactant	0	1	0	0	7	CCCCCCC[C@@H](O)CC(N[C@H](CC(C)C)C(N[C@H](CC(O)=O)C(N[C@@H](C(N[C@@H]([C@H](C)CC)C(N[C@@H](C(N[C@H](CCC(N)=O)C(N[C@@H](C(N[C@H]1CC(C)C)=O)COC([C@H]([C@H](CC)C)NC([C@@H](CO)NC([C@H](CC(C)C)NC1=O)=O)=O)=O)=O)=O)CC(C)C)=O)=O)CCC(N)=O)=O)=O)=O
BGC0001921	Streptomyces	ms-271	1	-1					Other		1	0	0	0	14
BGC0001042	Streptomyces	sanglifehrin a	1	1089.66	273.39	5.4073	14	9	NRP		1	0	0	0	44	CC[C@H]1C[C@H](C)[C@@]2(NC1=O)O[C@@H](C[C@H](O)[C@@H](C)CC\C=C\C=C(/C)[C@@H]1C\C=C\C=C\[C@H](O)[C@H](C)[C@@H](O)[C@@H](CCC(C)=O)C(=O)N[C@@H](C(C)C)C(=O)N[C@@H](CC3=CC(O)=CC=C3)C(=O)N3CCC[C@H](N3)C(=O)O1)[C@H](C)[C@H](O)[C@@H]2C
BGC0000472	Anabaena	anacyclamide a10	1	1052.53	392.99	-4.4512	14	13	RiPP		0	0	0	0	14	CC[C@H](C)[C@H]1C(=O)N[C@H](C(=O)NCC(=O)N[C@H](C(=O)N2CCC[C@H]2C(=O)N[C@H](C(=O)N3CCC[C@H]3C(=O)N[C@H](C(=O)N[C@H](C(=O)N[C@H](C(=O)N1)CCC(=O)N)CO)[C@@H](C)O)C(C)C)CO)CC4=CNC5=CC=CC=C54
BGC0000547	Streptococcus	salivaricin 9	1	-1					RiPP		1	0	0	0	11
BGC0000772	Brucella	lipopolysaccharide	1	4897.15	1888.75	-9.9821	107	62	Saccharide		0	0	0	0	12	CCCCCCCCCCCCCCCC1[C@H](OC([C@H]([C@@H]1OC(=O)CC(CCCCCCCCCCC)O)O)CO[C@H]2[C@H](C([C@@H](C(O2)CO[C@@]3(CC([C@H](C(O3)C(CO)O)O[C@H]4[C@@H](C([C@@H](C(O4)C(CO)O)OP(=O)(O)OP(=O)(O)OCCN)O[C@@H]5[C@@H](C([C@@H](C(O5)C(CO[C@@H]6[C@@H](C([C@](CO6)(C(CO)O)O)O)O)O)OP(=O)(O)O)O[C@@H]7C(C([C@@H](C(O7)CO[C@@H]8C(C([C@H](C(O8)CO)O)O)O)O)O[C@@H]9C(C([C@H](C(O9)CO)O)O)O[C@@H]1C(C([C@@H](C(O1)CO)O[C@@H]1C(C([C@H](…
BGC0001294	Streptomyces	7-prenylisatin	1	215.095	46.17	2.3301	2	1	Other		1	0	0	0	5	CC(C)=CCC1=CC=CC2=C1NC(=O)C2=O
BGC0000066	Streptomyces	geldanamycin	1	558.294	154.25	2.4361	8	3	Polyketide		1	0	0	0	23	CO[C@H]1C[C@H](C)CC2=C(OC)C(=O)C=C(NC(=O)\C(C)=C\C=C/[C@H](OC)[C@@H](CC(N)=O)\C(C)=C\[C@H](C)[C@H]1O)C2=O
BGC0000727	Streptomyces	indigoidine	1	-1					Saccharide		1	0	0	0	29
BGC0001671	Agrobacterium	monobactam	1	435.052	206.03	-2.2239	10	3	NRP		0	0	0	0	15	C[C@H]1[C@@H](C(=O)N1S(=O)(=O)[O-])NC(=O)/C(=N\OC(C)(C)C(=O)O)/C2=CSC(=N2)[NH3+]
BGC0001154	Catenulispora	cacibiocin b	1	397.971	152.86	2.7896	6	5	Other		1	0	0	0	14	OC(=O)C1=CC=C(N1)C(=O)NC1=C(O)C2=CC(Cl)=C(O)C(Cl)=C2OC1=O
BGC0001556	Streptomyces	combamide	1	-1					NRP		1	0	0	0	9
BGC0000102	Micromonospora	mycinamicin ii	1	727.414	175.21	1.7637	14	3	Polyketide		1	0	0	0	21	CC[C@@H]1[C@]([C@@H]2[C@H](O2)/C=C/C(=O)[C@@H](C[C@@H]([C@@H]([C@H](/C=C/C(=O)O1)C)O[C@H]3[C@@H]([C@H](C[C@H](O3)C)N(C)C)O)C)C)(CO[C@H]4[C@@H]([C@@H]([C@@H]([C@H](O4)C)O)OC)OC)O
BGC0000119	Streptomyces	7-deoxypactamycin	1	542.274	174.45	1.78372	9	6	Polyketide	Antibacterial,Antifungal,Cytotoxic	1	1	1	0	53	CC[C@]1(NC(=O)N(C)C)[C@@H](N)[C@H](NC2=CC(=CC=C2)C(C)=O)[C@](O)(COC(=O)C2=C(O)C=CC=C2C)[C@]1(C)O
BGC0000630	Paracoccus	(2r,3s,3's)-2-hydroxyastaxanthin	1	596.387	74.6	8.9054	4	2	Terpene		0	0	0	0	6	C\C(\C=C\C=C(/C)\C=C\C1=C(C)C(=O)[C@@H](O)CC1(C)C)=C/C=C/C=C(\C)/C=C/C=C(\C)/C=C/C1=C(C)C(=O)[C@@H](O)CC1(C)C
BGC0000723	Streptomyces	β-d-galactosylvalidoxylamine-a	1	497.211	253.02	-6.7527	14	12	Saccharide		1	0	0	0	22	OCC1CC(NC2C=C(CO)C(O)C(O)C2O)C(O)C(O)C1OC1OC(CO)C(O)C(O)C1O
BGC0000215	Streptomyces	curamycin	1	1374.43	384.88	0.41592	32	6	Polyketide		1	0	0	0	7	C[C@@H]1[C@H]([C@@H](C[C@@H](O1)O[C@@H]2[C@H](OC3(C[C@H]2O)O[C@@H]4[C@H](O[C@H](C[C@]4(O3)C)O[C@@H]5[C@H]([C@@H](O[C@@H]([C@@H]5OC)C)O[C@@H]6[C@H](O[C@H]([C@H]([C@H]6O)OC)O[C@H]7[C@@H]([C@H]8[C@H](CO7)O[C@@]9(O8)[C@H]1[C@H]([C@@]([C@H](O9)C)(C(=O)C)O)OCO1)OC(=O)C)COC)O)C)C)O)OC(=O)C1=C(C(=C(C(=C1OC)Cl)O)Cl)C
BGC0000047	Streptomyces	10,11-dihydro-8-deoxy-12,13-deepoxy-12,13-dihydrochalcomycin	1	658.393	148.44	3.3327	12	2	Polyketide		1	0	0	0	31	C[C@H]1C[C@H](C(=O)CCCC[C@H]([C@H](OC(=O)/C=C/[C@@H]([C@H]1O[C@H]2[C@@H]([C@H](C[C@H](O2)C)OC)O)C)C)O[C@H]3[C@@H]([C@@H]([C@@H]([C@H](O3)C)O)OC)OC)C
BGC0001085	Streptomyces	teleocidin b1	1	451.32	68.36	4.8131	3	3	NRP		1	0	0	0	4	CC(C)[C@@H]1N(C)C2=CC3=C(C4=C2C(C[C@@H](CO)NC1=O)=CN4)[C@](C)(CC[C@@]3(C)C(C)C)C=C
BGC0000905	Heliobacillus	heme d1	1	710.131	251.83	-4.15538	13	0	Other		1	0	0	0	17	[H+].[H+].[H+].[H+].CC1=C(C2=CC3=NC(=CC4=NC(=C(C4(C)CC(=O)[O-])[O-])C=C5C(C(=O)C(=N5)C=C1[N-]2)(C)CC(=O)[O-])C(=C3/C=C/C(=O)[O-])C)CCC(=O)[O-].[Fe+2]
BGC0000968	Penicillium	chaetoglobosins	1	556.294	111.79	4.7835	5	3	NRP	Cytotoxic	2	0	0	0	7	CC[C@H]1[C@H]2[C@@H](NC(=O)[C@@]23[C@@H](/C=C/C[C@@H](/C=C(\[C@H](C(=O)/C=C/C3=O)O)/C)C)[C@H]4[C@@]1(O4)C)[C@@H](C)C5=CNC6=CC=CC=C65
BGC0000684	Aspergillus	asperthecin	1	318.038	155.52	0.4823	8	6	Terpene		2	0	0	0	7	OCC1=CC2=C(C(O)=C1O)C(=O)C1=C(C(O)=C(O)C=C1O)C2=O
BGC0001235	Polyangium	antalid	1	527.245	117.62	3.9663	7	3	NRP		0	0	0	0	11	CC[C@H](O)C[C@H]1OC(=O)[C@@H](CC2=CC=CC=C2)NC(=O)C2=CSC(=N2)[C@@H](NC(=O)\C(C)=C\[C@H]1C)C(C)C
BGC0001441	Streptomyces	belactosin a	2	369.19	147.82	-0.6145	6	4	Other	Inhibitor	1	0	0	0	24	CC[C@H](C)[C@H]1[C@@H](OC1=O)C(=O)N[C@H]1C[C@@H]1C[C@H](NC(=O)[C@H](C)N)C(O)=O
BGC0001666	Micromonospora	microansamycin	1	-1					Polyketide		1	0	0	0	28
BGC0000176	Bacillus	difficidin	1	544.295	93.06	8.0062	4	2	Polyketide		1	0	0	0	15	CC1CC=CC=CC=CCCCC(OP(O)(O)=O)C(C)=CC=CCC(CCC(C)=CC=C)OC(=O)CC1=C
BGC0001016	Anabaena	microcystin	1	994.549	343.14	0.6184	11	10	NRP	Hepatotoxin	0	0	0	0	13	C[C@H]1[C@@H](NC(=O)[C@@H](NC(=O)[C@H]([C@@H](NC(=O)[C@@H](NC(=O)[C@H](NC(=O)C(=C)N(C(=O)CC[C@@H](NC1=O)C(=O)O)C)C)CC(C)C)C(=O)O)C)CCCN=C(N)N)/C=C/C(=C/[C@H](C)[C@H](CC2=CC=CC=C2)OC)/C
BGC0000767	Lactobacillus	exopolysaccharide	1	-1					Saccharide		1	0	0	0	23
BGC0001973	Streptomyces	fervenulin	1	-1					Other		1	0	0	0	28
BGC0000947	Vibrio	vibrioferrin	1	434.117	239.07	-2.732	8	7	Other		0	0	0	1	11	C[C@@H](C(=O)NCCC(C(=O)O)C(CC(=O)O)(C(=O)O)O)N1C(=O)CC[C@]1(C(=O)O)O
BGC0001679	Aspergillus	n-acetyltryptophan	1	246.1	82.19	1.2997	2	3	NRP		2	0	0	0	3	CC(=O)NC(CC1=CNC2=C1C=CC=C2)C(O)=O
BGC0001155	Planobispora	ge2270	1	1289.26	350.18	5.93372	24	7	RiPP	Antibacterial	1	1	0	0	21	CC1=C2C(=O)NCC(=O)NC(C3=NC(=CS3)C4=NC(=CS4)C5=C(C=CC(=N5)C6=NC(=CS6)C7=NC(CO7)C(=O)N8CCCC8C(=O)N)C9=NC(=CS9)C(=O)NC(C3=NC(=C(S3)COC)C(=O)NC(C(=N2)S1)CC(=O)NC)C(C)C)C(C1=CC=CC=C1)O
BGC0001999	Paraburkholderia	gramibactin	1	-1					NRP		0	0	0	0	15
BGC0000950	Streptomyces	napsamycin a	6	852.311	293.75	-0.6518	14	10	NRP	Antibacterial	1	1	0	0	29	CSCCC(C(NC(C(N/C=C1CC(C(N2C=CC(NC2=O)=O)O/1)O)=O)C(N(C(C3CC4=CC(O)=CC=C4CN3)=O)C)C)=O)NC(NC(C(O)=O)CC5=CC=CC(O)=C5)=O
BGC0001513	Actinobacteria	anthrabenzoxocinone	1	460.152	116.45	4.45842	7	4	Polyketide		1	0	0	0	12	CC1=CC(=CC2=C1[C@@H]3C4=C(C[C@@](O3)(O2)C)C=C5C(=C4O)C(=O)C6=C(C=C(C=C6C5(C)C)O)O)O
BGC0001498	Xenorhabdus	aerobactin	1	564.228	271.41	-1.4629	10	8	Other		0	0	0	1	9	CC(=O)N(CCCC[C@@H](C(=O)O)NC(=O)CC(CC(=O)N[C@@H](CCCCN(C(=O)C)O)C(=O)O)(C(=O)O)O)O
BGC0000394	Streptomyces	naphthyridinomycin	1	417.19	102.78	-1.5383	9	2	NRP		1	0	0	0	28	COC1=C(C)C(=O)C2=C(C(CO)N3C(O)C4CC5C6OCCN6C2C3C5N4C)C1=O
BGC0001425	Myxococcus	myxochromide a	1	845.469	226.41	2.5098	9	5	NRP		0	0	0	0	22	CN([C@H]1[C@@H](C)OC(=O)CC[C@H](NC(=O)[C@H](NC(=O)[C@H]2CCCN2C(=O)[C@H](CC(C)C)NC(=O)[C@@H](NC1=O)C)C)C(=O)N)C(=O)/C=C/C=C/C=C/C=C/C=C/C=C/C=C/C=C/C
BGC0000103	Mycobacterium	mycolactone b	1	742.502	153.75	7.5409	9	5	Polyketide		1	0	0	0	9	C[C@@H](O)C[C@@H](O)[C@H](C)\C=C(/C)C[C@H](C)[C@H]1C\C=C(C)/C[C@H](C)[C@H](CCCC(=O)O1)OC(=O)\C=C\C(\C)=C\C(\C)=C\C=C\C(\C)=C\[C@H](O)[C@@H](O)C[C@H](C)O
BGC0001473	Micromonospora	sch 18640	1	1681.49	545.34	1.1508	31	18	RiPP	Antibacterial	1	1	0	0	21	C[C@H]([C@H](NC1=S)C2=NC([C@@H](N3)[C@](C4=NC(C(N[C@@](C(N/C(C5=N[C@@H](C(N[C@](C(C)(O)[C@@H](C)O)([H])C6=NC1=CS6)=O)CS5)=C\C)=O)([H])[C@@H](C)O)=O)=CS4)(NC([C@H](C)NC(C(NC([C@H](C)NC([C@H]([C@@H](CC)C)N[C@@H]7C=CC8=C(N=C9C=C8[C@@H](O)C)[C@H]7O)=O)=O)=C)=O)=O)CC[C@@H]3C%10=NC(C(NC(C(NC(C(N)=O)=C)=O)=C)=O)=CS%10)=CS2)OC9=O
BGC0002009	Amycolatopsis	kanglemycin a	3	-1					Polyketide		1	0	0	0	34
BGC0001400	Aspergillus	citreoviridin	1	402.204	89.13	3.31802	6	2	Polyketide		2	0	0	0	5	C[C@@H]1[C@]([C@H]([C@](O1)(C)/C=C(\C)/C=C/C=C/C=C/C2=C(C(=CC(=O)O2)OC)C)O)(C)O
BGC0001331	Salinispora	be-43547a1	7	563.357	142.11	3.1857	7	3	NRP	Cytotoxic	1	0	0	0	15	O=C(CNC([C@](O)(C)C1=O)=O)NC(/C=C/C(N(C)CC(O[C@@H](CCCCCCCCCCC(C)C)[C@@H]1C)=O)=O)=C
BGC0001761	Sorangium	ripostatin a	3	494.267	93.06	5.8225	5	2	Polyketide		0	0	0	0	18	C\C(CC[C@@]1(O)C[C@H]2C[C@@H](C\C(C)=C/C\C=C/C\C(CC(O)=O)=C/C(=O)O2)O1)=C/CC1=CC=CC=C1
BGC0000564	Clostridium	clostridiolysin s	1	-1					RiPP	Hemolytic	1	0	0	0	9
BGC0001514	Streptomyces	aristeromycin	1	265.117	130.31	-1.3164	8	4	Other		1	0	0	0	33	NC1=NC=NC2=C1N=CN2[C@@H]1C[C@H](CO)[C@@H](O)[C@H]1O
BGC0000240	Salinispora	lomaiviticin a	4	1364.52	435.84	0.36296	26	8	Polyketide	Cytotoxic	1	0	0	0	65	CC[C@@]1(OC2CC(OC)C(O)C(C)O2)[C@H](OC2CC(O)C(C(C)O2)N(C)C)C2=C(C3=C(C2=[N+]=[N-])C(=O)C2=C(O)C=CC(O)=C2C3=O)C(=O)[C@@H]1[C@H]1C(=O)C2=C([C@@H](O[C@H]3CC(O)[C@@H](C(C)O3)N(C)C)[C@@]1(CC)OC1CC(OC)C(O)C(C)O1)C(=[N+]=[N-])C1=C2C(=O)C2=C(O)C=CC(O)=C2C1=O
BGC0000242	Streptomyces	lysolipin i	1	597.104	157.36	3.8866	11	3	Polyketide		1	0	0	0	46	[H][C@]12OCOC3=C1C(=C(O)C1=C3OC3=C(OC)C(Cl)=CC=C3C1=O)C1=C(O)C3=C(C=C1[C@H]2OC)[C@H](O)[C@H](OC)N(C)C3=O
BGC0000880	Streptomyces	tunicamycin b1	1	830.416	311.82	-2.3342	17	11	Other	Antibacterial,Antifungal,Cytotoxic	1	1	1	0	14	CCCCCCCCCCCC/C=C/C(=O)N[C@@H]1[C@H]([C@H]([C@H](O[C@H]1O[C@@H]2[C@@H]([C@H]([C@@H]([C@H](O2)CO)O)O)NC(=O)C)C[C@H]([C@@H]3[C@H]([C@H]([C@@H](O3)N4C=CC(=O)NC4=O)O)O)O)O)O
BGC0000746	Streptococcus	capsular polysaccharide	1	1322.45	660.55	-16.7828	38	25	Saccharide		1	0	0	0	7	CC(=O)N[C@@H]1[C@H](C[C@@](O[C@H]1[C@@H]([C@@H](CO)O)O)(C(=O)O)O[C@H]2[C@H]([C@H](O[C@H]([C@@H]2O)O[C@@H]3[C@H](O[C@@H]([C@@H]([C@H]3O)NC(=O)C)OC[C@@H]4[C@H]([C@@H]([C@H]([C@H](O4)O[C@H]5[C@H](O[C@H]([C@@H]([C@H]5O[C@H]6[C@@H]([C@H]([C@@H]([C@H](O6)CO)O)O)O)O)O[C@@H]7[C@H](O[C@H]([C@@H]([C@H]7O)O)O)CO)CO)O)O)O)CO)CO)O)O
BGC0000665	Streptomyces	xiamycin	1	363.183	73.32	4.3868	2	3	Terpene		1	0	0	0	15	[H][C@@]12CCC3=C(C=C4C(NC5=C4C=CC=C5)=C3)[C@@]1(C)CC[C@H](O)[C@@]2(C)C(O)=O
BGC0000274	uncultured	tetarimycin a	2	364.095	111.9	2.96152	6	3	Polyketide	Antibacterial	3	1	0	0	35	CC1=CC(O)=CC2=C1C(=O)C1=C(C2=O)C(C)(C)C2=CC(O)=CC(O)=C2C1=O
BGC0000218	Streptomyces	doxorubicin	1	543.174	206.07	0.0013	12	6	Polyketide		1	0	0	0	9	C[C@H]1[C@H]([C@H](C[C@@H](O1)O[C@H]2C[C@@](CC3=C(C4=C(C(=C23)O)C(=O)C5=C(C4=O)C=CC=C5OC)O)(C(=O)CO)O)N)O
BGC0001273	Aspergillus	asperlactone	1	184.074	59.06	0.0063	4	1	Polyketide		2	0	0	0	1	C[C@H]1[C@@H](O1)C2=C[C@@H](OC2=O)[C@H](C)O
BGC0001612	Fischerella	ambiguine h isonitrile	1	372.257	20.15	6.89649	0	1	Alkaloid		0	0	0	0	32	[H][C@@]12CC[C@@](C)(C=C)[C@@H]([N+]#[C-])[C@@]1([H])C1=C(NC3=CC=CC(=C13)C2(C)C)C(C)(C)C=C
BGC0001566	Cylindrospermum	cylindrocyclophane	1	584.408	121.38	9.2302	6	6	Polyketide		0	0	0	0	16	CCCC[C@@H]1CCCC[C@H]([C@@H](C2=CC(=C([C@@H](CCCC[C@H]([C@@H](C3=CC(=C1C(=C3)O)O)O)C)CCCC)C(=C2)O)O)O)C
BGC0000548	Streptococcus	salivaricin a	1	688.222	142.12	4.8316	12	0	RiPP		1	0	0	0	8	C[Si]1(O[Si](O[Si](O[Si](O1)(C)CCCOC(=O)C=C)(C)CCCOC(=O)C=C)(C)CCCOC(=O)C=C)CCCOC(=O)C=C
BGC0000045	Aspergillus	dehydrocurvularin	1	290.115	83.83	2.4948	5	2	Polyketide		2	0	0	0	8	CC1CCC\C=C\C(=O)C2=C(O)C=C(O)C=C2CC(=O)O1
BGC0001406	Streptomyces	telomycin	1	1271.55	495.77	-4.9842	19	17	NRP		1	0	0	0	34	C[C@@H]1[C@@H](C(=O)N[C@H](C(=O)N[C@H](C(=O)NCC(=O)N2CC[C@@H]([C@H]2C(=O)N/C(=C/C3=CNC4=CC=CC=C43)/C(=O)N[C@H](C(=O)N[C@H](C(=O)N5CC[C@H]([C@H]5C(=O)O1)O)[C@H](C(C)C)O)[C@H](C)C6=CNC7=CC=CC=C76)O)C)[C@H](C)O)NC(=O)[C@H](CO)NC(=O)C[C@@H](C(=O)O)N
BGC0000953	Streptomyces	amicetin	1	618.301	210.73	-0.3767	13	6	Saccharide	Antibacterial	1	1	0	0	24	C[C@H]1O[C@H](CC[C@@H]1O[C@H]1O[C@H](C)[C@H]([C@H](O)[C@H]1O)N(C)C)N1C=CC(NC(=O)C2=CC=C(NC(=O)[C@@](C)(N)CO)C=C2)=NC1=O
BGC0000009	Aspergillus	aflatoxin	1	328.058	84.2	1.8605	7	0	Polyketide		2	0	0	0	25	COC1=C2C3=C(C(=O)OCC3)C(=O)OC2=C4C5C=COC5OC4=C1
BGC0001073	Micromonospora	kosinostatin	1	616.206	184.21	2.0511	12	5	NRP		1	0	0	0	61	C[C@H]1[C@@]([C@@H](C[C@@H](O1)O[C@@H]2C3=C([C@@H]4C[C@]2(OC45C=C6CCN=C6N5)C)C(=C7C(=C3)C(=O)C8=C(C7=O)C=CC=C8O)O)O)(C(=O)C)O
BGC0001659	Fusarium	mangicol a	1	422.303	101.15	2.6374	5	5	Terpene		2	0	0	0	6	[H][C@@]12CC[C@H](C)[C@@]11[C@H](O)C[C@H](C)C1=C[C@@]1(C)CC[C@](C)(C[C@H](O)[C@H](O)[C@@](C)(O)CO)[C@@]21[H]
BGC0001134	Photorhabdus	photopyrone a	8	252.173	50.44	3.6667	3	1	Other	Signalling	0	0	0	0	1	CCCCCCC1=C(C=C(OC1=O)CC(C)C)O
BGC0000328	Pseudomonas	coronatine	1	319.178	83.47	2.3075	3	2	NRP		0	0	0	0	8	CCC1CC1(NC(=O)C1=CC(CC)CC2C1CCC2=O)C(O)=O
BGC0001305	Fusarium	fujikurin a	4	-1					Polyketide		2	0	0	0	6
BGC0000659	Saccharopolyspora	2-methylisoborneol	1	168.151	20.23	2.5836	1	1	Terpene		1	0	0	0	2	CC1(C2CCC1(C(C2)(C)O)C)C
BGC0000310	Bacillus	bacitracin	1	1421.75	530.87	-1.6776	19	17	NRP		1	1	0	0	9	CCC(C)C1C(=O)NC(C(=O)NC(C(=O)NC(C(=O)NC(C(=O)NCCCCC(C(=O)NC(C(=O)N1)CCCN)NC(=O)C(C(C)CC)NC(=O)C(CCC(=O)O)NC(=O)C(CC(C)C)NC(=O)C2CSC(=N2)C(C(C)CC)N)CC(=O)N)CC(=O)O)CC3=CN=CN3)CC4=CC=CC=C4
BGC0001349	Streptomyces	heronamide a	6	465.288	81	3.8518	4	3	NRP		1	0	0	0	24	[H][C@]12\C=C/C=C(C)/[C@@]3([H])[C@H](O)[C@H](O)C=C[C@]3([H])\C=C(C)\[C@@]1([H])[C@]1([H])[C@@H](O)C[C@@H](C\C=C\C=C\CCC)N1C2=O
BGC0000522	Lactococcus	lacticin z	1	5936.34	2258.74	-10.8173	74	77	RiPP		1	0	0	0	10	CC[C@H](C)[C@H](NC(=O)CNC(=O)[C@H](CC(C)C)NC(=O)[C@@H](NC(=O)[C@H](CCC(N)=O)NC(=O)[C@H](CCCCN)NC(=O)[C@@H](NC(=O)[C@H](CCCCN)NC(=O)[C@H](CCC(O)=O)NC(=O)[C@@H](NC(=O)[C@@H](NC(=O)[C@H](CC1=CNC2=C1C=CC=C2)NC(=O)[C@H](CC(O)=O)NC(=O)[C@@H](NC(=O)[C@H](C)NC(=O)[C@H](CCC(N)=O)NC(=O)CNC(=O)[C@H](C)NC(=O)[C@H](CC(N)=O)NC(=O)[C@@H](NC(=O)[C@H](CC1=CNC2=C1C=CC=C2)NC(=O)[C@H](CC(O)=O)NC(=O)[C@H](CC(C)C)NC(=…
BGC0001122	Aspergillus	dihydroisoflavipucine	2	239.116	71.55	1.18762	4	2	NRP		2	0	0	0	16	CC(C)C[C@H](O)[C@@H]1OC2=C(O1)C(=O)NC(C)=C2
BGC0000006	Aspergillus	aflatoxin	1	328.058	84.2	1.8605	7	0	Polyketide		2	0	0	0	23	COC1=C2C3=C(C(=O)OCC3)C(=O)OC2=C4C5C=COC5OC4=C1
BGC0001020	Streptomyces	muraymycin c1	1	945.44	432.59	-6.68543	19	16	NRP		1	0	0	0	38	CO[C@@H]1[C@H](O)[C@@H](CN)O[C@H]1O[C@@H]([C@H](NCCCNC(=O)[C@@H](NC(=O)[C@@H](NC(=O)N[C@@H](C(C)C)C(O)=O)[C@@H]1CCNC(=N)N1)[C@@H](O)C(C)C)C(O)=O)[C@H]1O[C@H]([C@H](O)[C@@H]1O)N1C=CC(=O)NC1=O
BGC0000005	Aspergillus	aflatoxin	1	328.058	84.2	1.8605	7	0	Polyketide		2	0	0	0	1	COC1=C2C3=C(C(=O)OCC3)C(=O)OC2=C4C5C=COC5OC4=C1
BGC0001099	Pseudomonas	kalimantacin a	1	548.346	156.02	4.8549	6	4	NRP	Antibacterial	0	1	0	0	29	CC(C\C=C\C=C/CCC(=C)CC(C)C\C(C)=C\C(O)=O)CC(=O)CC(O)CNC(=O)C(C)C(C)OC(N)=O
BGC0000357	Penicillium	cyclo-(d-phe-l-phe-d-val-l-val)	10	493.281					NRP	Inhibitor	2	0	0	0	1
BGC0000122	Nannocystis	phenylnannolone a	3	278.131	30.21	4.7028	2	0	Polyketide	Inhibitor	0	0	0	0	9	CC\C(\C=C\C1=CC=CC(=O)O1)=C/C=C/C1=CC=CC=C1
BGC0000670	Arabidopsis	thalianol	2	426.386	20.23	8.7893	1	1	Terpene		3	0	0	0	11	C[C@H](CC/C=C(\C)/CCC=C(C)C)[C@]1(CCC2=C1CC[C@@H]3[C@@]2(CC[C@@H](C3(C)C)O)C)C
BGC0001439	Streptomyces	antibiotic hki 10311129	5	1113.48	312.28	4.0898	22	5	Polyketide	Antibacterial	1	1	0	0	33	NC(C(C([C@]12O[C@H]3CC[C@H](O[C@H]4CC[C@H](O)[C@@H](C)O4)[C@@H](C)O3)=O)=C(O)[C@H](O[C@H]5CC[C@H](O[C@H]6CC[C@H](O[C@H]7CC[C@H](O[C@H]8CC[C@H](O)[C@H](C)O8)[C@H](C)O7)[C@H](C)O6)[C@@H](C)O5)C2CC9=CC%10=C(C(C=C(OC)C%10=O)=O)C(O)=C9C1=O)=O
BGC0001159	Streptomyces	marinopyrrole a	5	507.955	95.32	6.2922	5	3	NRP	Antibacterial	1	1	0	0	25	OC1=CC=CC=C1C(=O)C1=CC(Cl)=C(Cl)N1C1=C(NC(Cl)=C1Cl)C(=O)C1=CC=CC=C1O
BGC0001142	Penicillium	tryptoquialanine	1	518.18	131.27	2.5602	10	1	NRP		2	0	0	0	22	C[C@@H](C1=NC2=CC=CC=C2C(=O)N1[C@@H]3C[C@]4([C@H]5N(C6=CC=CC=C64)C(=O)C(N5O)(C)C)OC3=O)OC(=O)C
BGC0001114	Burkholderia	thailanstatin a	1	535.278	143.92	2.4472	8	3	NRP	Cytotoxic,Inhibitor	0	0	0	0	20	C[C@H](OC(C)=O)\C=C/C(=O)N[C@@H]1C[C@H](C)[C@H](C\C=C(/C)\C=C\[C@H]2O[C@H](CC(O)=O)C[C@@]3(CO3)[C@@H]2O)O[C@@H]1C
BGC0001652	Streptomyces	limazepine c	5	272.116	62.13	2.6251	4	1	NRP		1	0	0	0	18	[H][C@@]12CC(CC)=CN1C(=O)C1=CC=C(OC)C(O)=C1N=C2
BGC0000957	Streptomyces	mycotrienin i	1	636.341	148.1	4.2624	8	3	NRP		1	0	0	0	26	COC1CC(=O)NC2=CC(=O)C=C(CC\C=C(C)/C(O)C(C)C(C\C=C\C=C\C=C\1)OC(=O)C(C)NC(=O)C1CCCCC1)C2=O
BGC0001063	Streptomyces	undecylprodigiosin	1	393.278	53.17	6.7902	2	2	NRP		1	0	0	0	22	CCCCCCCCCCCC1=CC=C(N1)\C=C1\N=C(C=C1OC)C1=CC=CN1
BGC0000369	Anabaena	hassallidin c	1	-1					NRP	Antifungal	0	0	1	0	32
BGC0000343	Pseudomonas	enterobactin	1	669.144	287.58	-0.741	15	9	NRP		0	0	0	1	25	OC1=C(O)C(=CC=C1)C(=O)NC1COC(=O)C(COC(=O)C(COC1=O)NC(=O)C1=CC=CC(O)=C1O)NC(=O)C1=CC=CC(O)=C1O
BGC0000115	Streptomyces	nystatin a1	1	925.503	319.61	0.9357	17	12	Polyketide	Antifungal	1	0	1	0	22	C[C@H]1/C=C/C=C/CC/C=C/C=C/C=C/C=C/[C@@H](C[C@H]2[C@@H]([C@H](C[C@](O2)(C[C@H]([C@@H](CC[C@H](C[C@H](C[C@H](CC(=O)O[C@H]([C@@H]([C@@H]1O)C)C)O)O)O)O)O)O)O)C(=O)O)O[C@H]3[C@H]([C@H]([C@@H]([C@H](O3)C)O)N)O
BGC0001723	Streptomyces	oviedomycin	1	350.043	128.97	0.88782	7	3	Polyketide		1	0	0	0	10	CC1=C(O)C(=O)C2=C(C=C(O)C3=C2C(=O)C2=CC=CC(O)=C2C3=O)C1=O
BGC0001851	Streptomyces	komodoquinone b	1	-1					Polyketide		1	0	0	0	41
BGC0001859	Pseudomonas	fosfomycin	1	-1					Other	Antibacterial	0	1	0	0	14
BGC0000722	Streptomyces	validamycin a	1	513.242	253.02	-6.1166	14	12	Other	Antifungal	1	0	1	0	27	O[C@H]1[C@H](O)[C@@H](O)[C@@H](N[C@H]2C[C@H](CO)[C@@H](O[C@H](OC(CO)[C@@H](O)[C@H]3O)[C@H]3O)[C@H](O)[C@H]2O)C=C1CO.C
BGC0000860	Methylarcula	ectoine	1	142.074	61.69	-0.1487	3	2	Other		0	0	0	0	5	CC1=NCC[C@H](N1)C(=O)O
BGC0001202	uncultured	landepoxcin	1	-1					NRP		3	0	0	0	18
BGC0000476	uncultured	patellamide b	1	776.314	185.36	4.5512	12	4	RiPP		3	0	0	0	1	CC[C@H](C)[C@H]1C2=N[C@@H]([C@H](O2)C)C(=O)N[C@@H](C3=NC(=CS3)C(=O)N[C@H](C4=N[C@@H]([C@H](O4)C)C(=O)N[C@@H](C5=NC(=CS5)C(=O)N1)C)CC(C)C)CC6=CC=CC=C6
BGC0000052	Streptomyces	eco-02301	1	1296.75	411.17	3.9896	21	17	Polyketide		1	0	0	0	28	C[C@H](\C=C\CC\C=C\C=C\C=C\C=C\C(=O)NC1=C(O)CCC1=O)C(O)[C@@H](C)C(O)\C=C\C=C\C=C\C=C\C=C\CC(OC1OC(C)C(O)C(O)C1O)C(C)C(=O)CC(O)CC(O)CC(O)\C=C\CC(O)CC(O)CC(O)CC(O)\C=C\CC(O)CC(O)CCCN
BGC0000148	Saccharopolyspora	a83543a	1	731.461	120.01	5.5353	11	1	Polyketide		1	0	0	0	23	[H][C@@]12C[C@H](C[C@@]1([H])[C@]1([H])C=C3C(=O)[C@H](C)[C@H](CCC[C@H](CC)OC(=O)C[C@@]3([H])[C@]1([H])C=C2)O[C@H]1CC[C@H](NCC)[C@@H](C)O1)O[C@@H]1O[C@@H](C)[C@H](OC)[C@@H](OC)[C@H]1OC
BGC0000332	Microcystis	cyanopeptolin	1	925.422	351.78	-2.4239	14	9	NRP		0	0	0	0	7	CC[C@H](C)[C@H]1C(=O)O[C@@H]([C@@H](C(=O)N[C@H](C(=O)N[C@H]2CC[C@H](N(C2=O)[C@H](C(=O)N([C@H](C(=O)N1)CC3=CC=CC=C3)C)[C@@H](C)CC)O)CCCN=C(N)N)NC(=O)[C@@H](COS(=O)(=O)O)O)C
BGC0000988	Sorangium	epothilone b	1	507.265	109.25	4.47752	8	2	NRP		0	0	0	0	22	C[C@H]1CCC[C@@]2(C)O[C@H]2C[C@H](OC(=O)C[C@H](O)C(C)(C)C(=O)[C@H](C)[C@H]1O)C(\C)=C\C1=CSC(C)=N1
BGC0001669	Microbacterium	microvionin	1	-1					RiPP		1	0	0	0	23
BGC0000734	Pasteurella	capsular polysaccharide	1	-1					Saccharide		0	0	0	0	10
BGC0001007	Salinispora	lymphostin	4	310.107	106.67	2.1822	6	2	Polyketide	Inhibitor	1	0	0	0	13	NC1=C(N=C2)C(C2=CC(C(/C=C/OC)=O)=N3)=C3C(NC(C)=O)=C1
BGC0001783	Streptomyces	streptonigrin	1	506.144	197.18	2.31792	11	4	Other		1	0	0	0	55	COC1=CC=C(C(O)=C1OC)C1=C(N)C(=NC(C(O)=O)=C1C)C1=NC2=C(C=C1)C(=O)C(OC)=C(N)C2=O
BGC0001393	Staphylococcus	lugdunin	1	782.451	202.42	2.334	8	8	NRP		1	0	0	0	15	CC(C)C[C@@H]1C(=O)N[C@H](C(=O)N[C@@H](C(=O)N[C@H](C2N[C@@H](CS2)C(=O)N[C@@H](C(=O)N[C@H](C(=O)N1)CC3=CNC4=CC=CC=C43)C(C)C)C(C)C)C(C)C)C(C)C
BGC0001082	Penicillium	paxilline	4	435.241	82.55	3.9567	4	3	Terpene	Inhibitor	2	0	0	0	8	C[C@]12CC[C@H]3C(=CC(=O)[C@H](O3)C(C)(C)O)[C@@]1(CC[C@@H]4[C@@]2(C5=C(C4)C6=CC=CC=C6N5)C)O
BGC0000058	Streptomyces	fd-891	1	578.382	128.98	4.2675	8	4	Polyketide		1	0	0	0	8	[H][C@]12O[C@@H]1[C@H](O)[C@H](C)\C=C(/C)\C=C(C)\C(=O)O[C@@]([H])(C\C=C\C=C\C[C@H]2O)[C@@H](C)CCC(O)C(C)C(O)C(C)C(C)OC
BGC0000821	Lentzea	rebeccamycin	1	569.076	146.04	3.2459	8	5	Other	Cytotoxic	1	0	0	0	16	CO[C@H]1[C@H](O)[C@@H](O)[C@@H](O[C@@H]1CO)N1C2=C3NC4=C(C=CC=C4Cl)C3=C3C(=O)NC(=O)C3=C2C2=CC=CC(Cl)=C12
BGC0000245	Streptomyces	medermycin	1	441.179	102.37	1.606	8	1	Polyketide		1	0	0	0	36	C[C@@H]1[C@H]([C@@H](CC(O1)C2=CC3=C(C=C2)C(=O)C4=C(C3=O)[C@H](O[C@H]5[C@@H]4OC(=O)C5)C)N(C)C)O
BGC0001173	Bacillus	plantazolicin	1	-1					RiPP	Antibacterial	1	1	0	0	12
BGC0000978	Cylindrospermopsis	cylindrospermopsin	1	415.116	177.18	-1.9049	9	5	NRP	Cytotoxic,Neurotoxic	0	0	0	0	14	C[C@H]1[C@H](C[C@@H]2C[C@@H](NC3=NC[C@H]1N23)[C@@H](C4=CC(=O)NC(=O)N4)O)OS(=O)(=O)O
BGC0001497	Streptomyces	actinonin	1	385.258	118.97	1.2025	5	4	Polyketide		1	0	0	0	18	CCCCC[C@H](CC(=O)NO)C(=O)N[C@@H](C(C)C)C(=O)N1CCC[C@H]1CO
BGC0000893	Streptomyces	chloramphenicol	1	322.012	112.7	0.909	5	3	NRP	Antibacterial	1	1	0	0	17	OCC(NC(=O)C(Cl)Cl)C(O)C1=CC=C(C=C1)N(=O)=O
BGC0001487	Streptomyces	3,7-dihydroxytropolone	1	154.027	77.76	0.1636	4	3	Other		1	0	0	0	9	C1=CC(=O)C(=C(C(=C1)O)O)O
BGC0001415	Serratia	althiomycin	1	439.062	149.76	-0.3804	11	3	NRP		0	0	0	0	8	COC1=CC(=O)N(C1)C(=O)C2CSC(=N2)C(CO)NC(=O)C3=CSC(=CN=O)N3
BGC0001018	Microcystis	micropeptin k139	1	986.544	354.58	-0.3588	13	10	NRP		0	0	0	0	8	CCCCCC(=O)N[C@@H](CC(=O)O)C(=O)N[C@@H]1[C@H](OC(=O)[C@@H](NC(=O)[C@@H](N(C(=O)[C@@H](N2C(CCC(C2=O)NC(=O)[C@@H](NC1=O)CCCN=C(N)N)O)[C@H](C)CC)C)CC3=CC=C(C=C3)O)[C@@H](C)CC)C
BGC0001278	Fusarium	nivalenol	12	312.121	119.75	-1.8669	7	4	Terpene		2	0	0	0	25	CC1=C[C@@H]2[C@]([C@@H](C1=O)O)([C@]3([C@@H]([C@H]([C@H]([C@@]34CO4)O2)O)O)C)CO
BGC0001417	Cystobacterineae	myxochromide d	1	736.416	206.1	2.3527	8	5	NRP		0	0	0	0	20	C1(=O)N[C@@H](CC(C)C)C(=O)N[C@@H](C)C(=O)N[C@@H](CCC(=O)N)C(=O)O[C@H](C)[C@H](N(C)C(=O)/C=C/C=C/C=C/C=C/C=C/C=C/C=C/CC)C(=O)N[C@@H]1C
BGC0001058	Streptomyces	zorbamycin	1	1411.56	676.41	-7.95481	32	22	NRP	Cytotoxic	1	0	0	0	48	[H][C@](N)(CN[C@@]([H])(CC(N)=O)C1=NC(N)=C(C)C(=N1)C(=O)N[C@]([H])(C(=O)N[C@]([H])(CCO)[C@@]([H])(O)[C@]([H])(C)C(=O)N[C@]([H])(C(=O)NCCC1=N[C@]([H])(CS1)C1=NC(=CS1)C(=O)NCCC(N)=N)C(C)(C)O)[C@@]([H])(O[C@@H]1O[C@@H](C)[C@@H](O)[C@H](O)[C@@H]1O[C@H]1O[C@H](CO)[C@@H](O)[C@H](OC(N)=O)[C@@H]1O)C1=CNC=N1)C(N)=O
BGC0000100	Streptomyces	monensin	1	670.429	153.37	4.2729	10	4	Polyketide		1	0	0	0	34	CCC1(CCC(O1)C1(C)CCC2(CC(O)C(C)C(O2)C(C)C(OC)C(C)C(O)=O)O1)C1OC(CC1C)C1OC(O)(CO)C(C)CC1C
BGC0000691	Actinoplanes	acarbose	1	645.248	321.17	-8.5645	19	14	Saccharide		1	0	0	0	28	C[C@@H]1[C@H]([C@@H]([C@H]([C@H](O1)O[C@@H]2[C@H](O[C@@H]([C@@H]([C@H]2O)O)O[C@@H]3[C@H](OC([C@@H]([C@H]3O)O)O)CO)CO)O)O)N[C@H]4C=C([C@H]([C@@H]([C@H]4O)O)O)CO
BGC0001756	Arabidopsis	retigeranin	2	-1					Terpene		3	0	0	0	9
BGC0000763	Pantoea	stewartan	1	-1					Saccharide		0	0	0	0	14
BGC0001710	Pseudomonas	obafluorin	1	358.08	139	1.2725	7	3	NRP		0	0	0	0	14	OC1=C(O)C(=CC=C1)C(=O)N[C@H]1[C@@H](CC2=CC=C(C=C2)N(=O)=O)OC1=O
BGC0001791	Gynuella	sunshinamide	1	-1					NRP		0	0	0	0	12
BGC0000961	Burkholderia	bactobolin	1	382.07	142.11	-0.5086	7	5	NRP		0	0	0	0	21	[H][C@@](C)(N)C(=O)N[C@@H]1[C@]2([H])[C@@H](O)[C@H](O)CC(O)=C2C(=O)O[C@]1(C)C(Cl)Cl
BGC0000682	Aspergillus	terretonin	1	488.205	144.27	2.154	9	2	Terpene		2	0	0	0	10	C[C@]12CCC(=O)C(C1=C(C(=O)[C@@]3([C@@]2(CC(=C)[C@]4([C@H]3C(=O)O[C@@](C4=O)(C)C(=O)OC)C)O)C)O)(C)C
BGC0001960	Streptomyces	hiroshidine	1	-1					Polyketide		1	0	0	0	29
BGC0000379	Streptomyces	glycinocin a	1	1246.64	463.75	-2.6802	16	14	NRP		1	0	0	0	43	CCC(C)[C@@H]1NC(=O)[C@H](NC(=O)CNC(=O)[C@H](CC(O)=O)NC(=O)CNC(=O)[C@H](CC(O)=O)NC(=O)CNC(=O)C2CCCCN2C(=O)[C@H](CNC(=O)[C@@H]2CCCN2C1=O)NC(=O)[C@H](CC(O)=O)NC(=O)\C=C\CCCCCCCCCC(C)C)C(C)O
BGC0000368	Streptomyces	streptobactin	1	1179.49	560.58	-3.33129	21	21	NRP		1	0	0	0	17	C[C@H]1OC(=O)[C@@H](NC(=O)[C@H](CCCNC(N)=N)NC(=O)C2=CC=CC(O)=C2O)[C@@H](C)OC(=O)[C@@H](NC(=O)[C@H](CCCNC(N)=N)NC(=O)C2=CC=CC(O)=C2O)[C@@H](C)OC(=O)[C@H]1NC(=O)[C@H](CCCNC(N)=N)NC(=O)C1=CC=CC(O)=C1O
BGC0001856	Streptomyces	caniferolide a	4	1592.81					Polyketide	Antifungal,Cytotoxic	1	0	1	0	62
BGC0000876	Streptomyces	neopolyoxin c	1	495.16	250.32	-3.4772	12	8	Other		1	0	0	0	8	[H][C@@](N)(C(=O)N[C@]([H])(C(O)=O)[C@@]1([H])O[C@H]([C@H](O)[C@@H]1O)N1C=CC(=O)NC1=O)[C@]([H])(C)[C@]([H])(O)C1=NC=C(O)C=C1
BGC0001254	Alternaria	act-toxin ii	1	509.262	165.92	1.4102	8	5	Polyketide		2	0	0	0	1	C/C=C(\C)/CC(C)(C(C(C(=O)NC(C(C)C)C(=O)O[C@H](/C=C/C=C\C=C\C(=O)O)[C@@]1(CO1)C)O)O)O
BGC0000425	Pseudomonas	sessilin a	1	2045.25	785.44	-3.9402	28	26	NRP	Antifungal,Surfactant	0	0	1	0	9	O=C(N[C@@H]([C@@H](C)CC)C(N[C@@H](CCO)C(N[C@H](CCN)C(N[C@@H](CCCCN)C(O)=O)=O)=O)=O)[C@@H]([C@H](O)C)NC(/C(NC([C@@H](C(C)C)NC([C@H](CC(C)C)NC([C@@H](CCC(N)=O)NC([C@H](C(C)C)NC([C@@H](C(C)C)NC([C@@H](CC(C)C)NC([C@@H](CCC(N)=O)NC([C@@H](C(C)C)NC([C@@H](CC(C)C)NC([C@@H](CO)NC([C@]1(C(CC(O)CCCCC)=O)N(C(/C(N)=C/C)=O)CCC1)=O)=O)=O)=O)=O)=O)=O)=O)=O)=O)=O)=C\C)=O
BGC0000544	Planomonospora	planosporicin	1	2191.78	825.83	-11.3462	33	28	RiPP	Antibacterial	1	1	0	0	15	CC[C@H](C)[C@H](N)C(=O)N\C(=C/C)C(=O)N[C@H]1CSC[C@@H]2NC(=O)[C@@H](NC(=O)[C@@H]3CSCC[C@H](NC(=O)[C@H](CSC[C@@H]4NC(=O)CNC(=O)[C@H](CSC[C@@H]5NC(=O)[C@H](CC6=CN=CN6)NC(=O)[C@H](CSC[C@H](NC5=O)C(=O)N5CCC[C@H]5C(=O)NCC(O)=O)NC4=O)NC(=O)CNC(=O)CNC(=O)CNC(=O)[C@H](CCC(O)=O)NC2=O)NC(=O)[C@H](CC2=CNC4=C2C=CC=C4)NC(=O)C(=C)NC(=O)[C@@H](NC1=O)C(C)C)C(=O)N3)[C@@H](C)O
BGC0001838	Pseudomonas	wlip	1	-1					NRP		0	0	0	0	7
BGC0000026	Streptomyces	avilamycin a	2	1402.46	384.88	1.05202	32	6	Saccharide	Antibacterial	1	1	0	0	40	C[C@@H]1[C@H]([C@@H](C[C@@H](O1)O[C@@H]2[C@H](OC3(C[C@@H]2O)O[C@@H]4[C@H](O[C@H](C[C@]4(O3)C)O[C@@H]5[C@H]([C@@H](O[C@@H]([C@@H]5OC)C)O[C@@H]6[C@H](O[C@H]([C@H]([C@H]6O)OC)O[C@H]7[C@@H]([C@H]8[C@H](CO7)O[C@@]9(O8)C1C([C@@]([C@H](O9)C)(C(=O)C)O)OCO1)OC(=O)C(C)C)COC)O)C)C)O)OC(=O)C1=C(C(=C(C(=C1OC)Cl)O)Cl)C
BGC0001995	Aspergillus	heptelidic acid	1	-1					Terpene		2	0	0	0	11
BGC0000019	Streptomyces	angolamycin	1	915.519	230.97	2.0739	18	4	Polyketide		1	1	0	0	13	CCC1C(C2C(O2)(/C=C/C(=O)C(CC(C(C(C(CC(=O)O1)O)C)OC3CC(C(C(O3)C)OC4CC(C(C(O4)C)O)(C)O)N(C)C)CC=O)C)C)COC5C(C(C(C(O5)C)O)OC)OC
BGC0001544	Aspergillus	chlorflavonin	1	378.051	98.36	3.5504	7	2	NRP		2	0	0	0	11	COC1=C(C2=C(C(=C1)O)C(=O)C(=C(O2)C3=C(C(=CC=C3)Cl)O)OC)OC
BGC0000241	Salinispora	lomaiviticin a	4	1364.52	435.84	0.36296	26	8	Polyketide	Antibacterial,Cytotoxic	1	1	0	0	58	CC[C@@]1(OC2CC(OC)C(O)C(C)O2)[C@H](OC2CC(O)C(C(C)O2)N(C)C)C2=C(C3=C(C2=[N+]=[N-])C(=O)C2=C(O)C=CC(O)=C2C3=O)C(=O)[C@@H]1[C@H]1C(=O)C2=C([C@@H](O[C@H]3CC(O)[C@@H](C(C)O3)N(C)C)[C@@]1(CC)OC1CC(OC)C(O)C(C)O1)C(=[N+]=[N-])C1=C2C(=O)C2=C(O)C=CC(O)=C2C1=O
BGC0001540	Streptomyces	cc-1065	1	703.239	210.31	3.85212	8	6	Other		1	0	0	0	33	CC1=CNC2=C1[C@@]34C[C@@H]3CN(C4=CC2=O)C(=O)C5=CC6=C7CCN(C7=C(C(=C6N5)OC)O)C(=O)C8=CC9=C1CCN(C1=C(C(=C9N8)OC)O)C(=O)N
BGC0000921	Pseudomonas	promysalin	1	474.273	130.16	3.7993	6	3	Other	Antibacterial	0	1	0	0	15	O=C(OC(CCCCCC(O)C(N)=O)CCCCCC)C(CC=C1)N1C(C2=C(O)C=CC=C2)=O
BGC0001276	Aspergillus	6-methylsalicyclic acid	1	152.047	57.53	1.39882	2	2	Polyketide		2	0	0	0	1	CC1=C(C(=CC=C1)O)C(=O)O
BGC0001900	Burkholderia	fragin	1	-1					NRP		0	0	0	0	5
BGC0000755	Avibacterium	capsular polysaccharide	1	-1					Saccharide		0	0	0	0	6
BGC0000954	Chondromyces	ajudazol a	1	590.299	122.33	6.00052	8	2	NRP		0	0	0	0	13	CO\C(C)=C\C(=O)N(C)C\C=C\CC\C=C/C=C\CC(=C)C1=NC(C[C@H](C)[C@@H]2OC(=O)C3=C(O)C(C)=CC=C3[C@H]2O)=CO1
BGC0001345	Stigmatella	myxochelin a	2	404.158	159.35	1.2	7	7	NRP		0	0	0	0	12	OC[C@H](CCCCNC(=O)C1=CC=CC(O)=C1O)NC(=O)C1=CC=CC(O)=C1O
BGC0000736	Mannheimia	capsular polysaccharide	1	-1					Saccharide		0	0	0	0	12
BGC0000787	Escherichia	o-antigen	1	-1					Saccharide		0	0	0	0	13
BGC0001635	Nonomuraea	kistamicin a	1	1170.32	373.32	5.3805	15	14	NRP		1	0	0	0	25	NC(CC1=CC=C(O)C=C1)C(=O)NC1CC2=CNC3=C2C=CC(=C3)C2=CC3=CC(OC4=CC=C(CC5NC(=O)C(NC(=O)C3NC(=O)C(NC1=O)C1=CC(O)=CC(O)=C1)C1=CC=C(OC3=C(O)C=CC(=C3)C(NC5=O)C(O)=O)C(Cl)=C1)C=C4)=C2O
BGC0001532	Brevibacillus	bogorol a	1	1583.08	517.05	1.9769	19	19	NRP		1	0	0	0	18	[H][C@](NC(=O)[C@@H](CCCN)NC(=O)C(CC(C)C)NC(=O)C(\NC(=O)[C@@H](O)[C@@H](C)CC)=C/C)([C@@H](C)CC)C(=O)N[C@@H](C(C)C)C(=O)N[C@@H](C(C)C)C(=O)NC(CCCCN)C(=O)N[C@@H](C(C)C)C(=O)NC(CC(C)C)C(=O)NC(CCCCN)C(=O)N[C@H](CC1=CC=C(O)C=C1)C(=O)NC(CC(C)C)C(=O)N[C@H](CO)C(C)C
BGC0000381	Bacillus	lichenysin	1	-1					NRP		1	0	0	0	14
BGC0001785	Streptomyces	streptovaricin	1	769.331	238.61	0.78762	14	7	Polyketide		1	0	0	0	41	C[C@@H]1/C=C\C=C(\C(=O)NC2=C(C(=C3C(=C(C(=C4C3=C(/C(=C/[C@@]([C@@H]([C@H]([C@H]([C@@H]([C@@H]([C@@H]([C@@H]1O)C)O)C(=O)OC)O)C)O)(C)O)/C)OCO4)C)O)C2=O)OC(=O)C)C)/C
BGC0001730	Actinoallomurus	paramagnetoquinone 1	2	-1					Polyketide		1	0	0	0	28
BGC0000633	Streptomyces	carotenoid	1	738.674	99.38	11.5564	6	4	Terpene		1	0	0	0	11	C[C@H](CCCCC(C)CCC[C@@H](C)CCCC(C)CCC=C(C)C)CCC[C@H](C)CCC[C@H](C)CCCC(C)(C)O[C@@H]1[C@@H]([C@H]([C@@H]([C@H](O1)CO)O)O)O
BGC0001477	Streptomyces	lydicamycin	1	854.54	261.12	3.60797	11	11	NRP	Antibacterial	1	1	0	0	25	CC1=CC2C(CCC(C2O)O)C(C1CCC(C)C(/C(=C/CC(/C=C/C(C)C(/C=C/CC(/C(=C/CC(CC3CCCN3C(=N)N)O)/C)O)O)O)/C)O)(C)/C(=C\4/C(=O)CNC4=O)/O
BGC0001564	Cuspidothrix	cusperin	1	-1					NRP		0	0	0	0	11
BGC0001965	Streptomyces	nybomycin	1	-1					Other		1	0	0	0	27
BGC0000667	Penicillium	pr-toxin	1	320.126	85.5	0.9673	6	0	Terpene		2	0	0	0	4	CC1C(OC(C)=O)C2OC2C2=CC(=O)C3(CC12C)OC3(C)C=O
BGC0001436	Paecilomyces	cornexistin	1	308.126	100.9	0.8137	6	2	Polyketide	Herbicidal	2	0	0	0	21	O=C(OC1=O)C2=C1[C@@H](CCC)[C@H](O)C(C[C@H](O)/C(C2)=C\C)=O
BGC0000505	Enterococcus	enterocin w α	2	-1					RiPP		1	0	0	0	2
BGC0000347	Streptococcus	equibactin	1	-1					NRP		1	0	0	1	14
BGC0000221	uncultured	erdacin	1	474.095	169.43	2.4072	8	5	Polyketide		3	0	0	0	25	CC(=O)[C@H]1C2=C3C(C(C(C)=O)=C2C2=CC=CC(O)=C2[C@@]1(O)C(O)=O)=C(O)C(=O)C1=C(O)C=CC=C31
BGC0001534	Streptomyces	branched-chain fatty acids	1	-1					Other		1	0	0	0	4
BGC0000833	Streptomyces	coumermycin a1	1	1109.38	354.89	5.572	20	9	Saccharide	Antibacterial	1	1	0	0	32	CC1=CC=C(N1)C(=O)O[C@H]2[C@H]([C@@H](OC([C@@H]2OC)(C)C)OC3=C(C4=C(C=C3)C(=C(C(=O)O4)NC(=O)C5=CNC(=C5C)C(=O)NC6=C(C7=C(C(=C(C=C7)O[C@H]8[C@@H]([C@@H]([C@H](C(O8)(C)C)OC)OC(=O)C9=CC=C(N9)C)O)C)OC6=O)O)O)C)O
BGC0000644	Dietzia	carotenoid	1	738.674	99.38	11.5564	6	4	Terpene		1	0	0	0	6	C[C@H](CCCCC(C)CCC[C@@H](C)CCCC(C)CCC=C(C)C)CCC[C@H](C)CCC[C@H](C)CCCC(C)(C)O[C@@H]1[C@@H]([C@H]([C@@H]([C@H](O1)CO)O)O)O
BGC0000402	Paenibacillus	paenilarvins	1	-1					NRP		1	0	0	0	4
BGC0001688	uncultured	n-tetradecanoyl tyrosine	1	365.257	89.79	3.6511	4	4	Other		3	0	0	0	30	CCCCCCCCCCCC(=O)N[C@@H](Cc1ccc(O)cc1)C(O)O
BGC0000055	Saccharopolyspora	erythromycin a	4	733.461	193.91	1.7856	14	5	Polyketide	Antibacterial,Inhibitor	1	1	0	0	23	CC[C@@H]1[C@@]([C@@H]([C@H](C(=O)[C@@H](C[C@@]([C@@H]([C@H]([C@@H]([C@H](C(=O)O1)C)O[C@H]2C[C@@]([C@H]([C@@H](O2)C)O)(C)OC)C)O[C@H]3[C@@H]([C@H](C[C@H](O3)C)N(C)C)O)(C)O)C)C)O)(C)O
BGC0000814	Nonomuraea	k-252a	1	467.148	94.72	3.6551	7	2	Alkaloid		1	0	0	0	35	C[C@@]12[C@](C[C@@H](O1)N3C4=CC=CC=C4C5=C6C(=C7C8=CC=CC=C8N2C7=C53)CNC6=O)(C(=O)OC)O
BGC0001929	Streptococcus	wgk	1	-1					RiPP		1	0	0	0	5
BGC0000721	Streptoalloteichus	tobramycin	1	467.259	268.17	-6.2958	14	10	Saccharide		1	1	0	0	38	C1[C@@H]([C@H]([C@@H]([C@H]([C@@H]1N)O[C@@H]2[C@@H]([C@H]([C@@H]([C@H](O2)CO)O)N)O)O)O[C@@H]3[C@@H](C[C@@H]([C@H](O3)CN)O)N)N
BGC0000836	Escherichia	ape ec	1	322.157	46.53	4.66782	3	1	Other	Antioxidant	0	0	0	0	19	CC1=C(O)C=CC(/C=C/C=C/C=C/C=C/C=C/C=C/C(OC)=O)=C1
BGC0001047	Pseudomonas	syringolin a	1	493.29	165.73	0.6773	5	6	NRP		0	0	0	0	7	CC(C)C1/C=C/C(=O)NCC/C=C\C(C(=O)N1)NC(=O)C(C(C)C)NC(=O)NC(C(C)C)C(=O)O
BGC0000243	Streptomyces	macrotetrolide	1	-1					Polyketide		1	0	0	0	12
BGC0000096	Streptomyces	midecamycin	1	813.451	206.05	2.7674	16	3	Polyketide		1	0	0	0	43	CCC(=O)O[C@@H]1[C@H](O[C@H](C[C@@]1(C)O)O[C@@H]2[C@H](O[C@H]([C@@H]([C@H]2N(C)C)O)OC3C(CC(C(/C=C\C=C\CC(OC(=O)CC(C3OC)OC(=O)CC)C)O)C)CC=O)C)C
BGC0000610	Streptomyces	nosiheptide	1	1221.15	381.23	3.51322	24	10	RiPP		1	0	0	0	26	C/C=C\1/C2=NC(=CS2)C(=O)NC3CC(C(=O)OCC4=C5C(=C(C(=O)SCC(C6=NC(=CS6)C7=N/C(=C/8\NC(=CS8)C(=O)NC(=C)C(=O)N)/C(=O)C=C7C9=NC(=CS9)C(=O)NC(C(=O)N1)C(C)O)NC(=O)C1=CSC3=N1)NC5=CC=C4)C)O
BGC0001722	Aspergillus	aspernidine a	1	399.241	67.79	5.4422	4	2	Polyketide		2	0	0	0	6	CC(=CCC/C(=C/CC/C(=C/COC1=C(C=C2C(=C1O)CNC2=O)OC)/C)/C)C
BGC0001367	Haliangium	haliamide	1	283.194	29.1	4.5196	1	1	NRP		0	0	0	0	17	CC(C\C(C)=C\C=C\C(C)NC(=O)C1=CC=CC=C1)C=C
BGC0001719	Streptomyces	olimycin a	2	-1					Polyketide		1	0	0	0	34
BGC0000770	Campylobacter	lipo-oligosaccharide	1	-1					Saccharide		0	0	0	0	15
BGC0001227	Streptomyces	isorenieratene	1	-1					Terpene		1	0	0	0	11
BGC0000620	Lactococcus	lacticin q	1	-1					RiPP		1	0	0	0	12
BGC0000320	Bacillus	cereulide	1	1152.68	332.4	3.5136	18	6	NRP	Cytotoxic	1	0	0	0	14	CC(C)C[C@H]1OC(=O)[C@@H](NC(=O)[C@@H](OC(=O)[C@@H](C)NC(=O)[C@@H](CC(C)C)OC(=O)[C@@H](NC(=O)[C@@H](OC(=O)[C@@H](C)NC(=O)[C@@H](CC(C)C)OC(=O)[C@@H](NC(=O)[C@@H](OC(=O)[C@@H](C)NC1=O)C(C)C)C(C)C)C(C)C)C(C)C)C(C)C)C(C)C
BGC0000307	Aureobasidium	abt1	1	1100.69	235.38	4.3718	11	4	NRP		2	0	0	0	1	[H][C@@](C)(CC)[C@]1([H])NC(=O)[C@]2([H])CCCN2C(=O)[C@]([H])(CC2=CC=CC=C2)N(C)C(=O)[C@]([H])(CC2=CC=CC=C2)NC(=O)[C@]([H])(C(C)C)N(C)C(=O)[C@]([H])(OC(=O)[C@@]([H])(N(C)C(=O)[C@]([H])(CC(C)C)NC(=O)[C@]([H])(C(C)C)N(C)C1=O)C(C)(C)O)[C@@]([H])(C)CC
BGC0001812	Micromonospora	tylactone	1	394.272	83.83	3.8299	5	2	Polyketide		1	0	0	0	29	CC[C@@H]1C[C@H](C(=O)/C=C/C(=C/[C@H]([C@H](OC(=O)C[C@H]([C@H]([C@H]1O)C)O)CC)C)/C)C
BGC0000041	Pseudomonas	oronofacic acid	1	208.11	54.37	2.0226	2	1	Polyketide		0	0	0	0	2	[H][C@]12CCC(=O)[C@@]1([H])C[C@@H](CC)C=C2C(O)=O
BGC0000150	Salinispora	sporolide a	2	538.088	184.74	-1.2185	12	5	NRP		1	0	0	0	47	[H]C12OC11C(=O)C(C)=C3OC45C(O)C6=C(C(Cl)=C(C=C6)[C@@]([H])(O)COC(=O)[C@]1([H])OC)C4(OC23O)C([H])(O)CC5([H])O
BGC0001266	Cladonia	grayanic acid	1	414.168	102.29	5.24522	6	2	Polyketide		2	0	0	0	3	CCCCCCCC1=C2C(=CC(=C1C(=O)O)O)OC(=O)C3=C(O2)C=C(C=C3C)OC
BGC0000399	Pseudomonas	orfamide a	2	1294.84	415.29	2.1875	16	14	NRP	Antifungal,Surfactant,anti-algal: lyses zoospores of Phytophthora sp.	0	0	1	0	17	CCCCCCCCCCCC(O)CC(=O)N[C@@H](CC(C)C)C(=O)N[C@H](CCC(O)=O)C(=O)N[C@@H]1[C@@H](C)OC(=O)[C@@H](NC(=O)[C@@H](CO)NC(=O)[C@H](CC(C)C)NC(=O)[C@H](CC(C)C)NC(=O)[C@@H](CO)NC(=O)[C@H](CC(C)C)NC(=O)[C@H](NC1=O)C(C)CC)C(C)C
BGC0000519	Actinomadura	labyrinthopeptin a2	3	1922.69					RiPP	Antiviral	1	0	0	0	5
BGC0001499	Pantoea	aerobactin	1	564.228	271.41	-1.4629	10	8	Other		0	0	0	1	6	CC(=O)N(CCCC[C@@H](C(=O)O)NC(=O)CC(CC(=O)N[C@@H](CCCCN(C(=O)C)O)C(=O)O)(C(=O)O)O)O
BGC0001918	Streptomyces	jbir-06	1	-1					NRP		1	0	0	0	18
BGC0001816	Shuttle	valactamide a	1	506.408	84.5	6.0446	4	2	NRP		3	0	0	0	16	CCC(C)[C@H]1C(=O)OC(CCC(CC(CC(CC(/C=C(/C(=O)N[C@H](C(=O)N1)C(C)C)\C)C)C)C)C)C
BGC0000999	Lysobacter	heat-stable antifungal factor	1	-1					NRP		0	0	0	0	8
BGC0001444	Streptomyces	caboxamycin	1	255.053	83.56	2.8986	4	2	Other		1	0	0	0	10	OC(=O)C1=CC=CC2=C1N=C(O2)C1=C(O)C=CC=C1
BGC0000467	Yersinia	yersiniabactin	1	481.116	114.51	2.661	9	4	NRP		0	0	0	1	4	CC(C)(C(O)C1CSC(N1)C1CSC(=N1)C1=CC=CC=C1O)C1=NC(C)(CS1)C(O)=O
BGC0001516	Aspergillus	aspergillic acid	1	224.152	55.12	2.1926	4	1	NRP		2	0	0	0	7	CCC(C)C1=CN=C(C(=O)N1O)CC(C)C
BGC0001640	Kocuria	kocurin	1	1514.37	453.57	4.66802	25	10	RiPP		1	0	0	0	9	C[C@H](NC(=O)C(=C)NC(=O)C1=CSC(=N1)C1=NC2=C(C=C1)C1=NC(=C(C)O1)C(=O)N[C@@H](CC(N)=O)C1=NC(=CS1)C(=O)N[C@@H](CC1=CC=CC=C1)C1=N[C@@H](CS1)C(=O)N[C@@H](CC1=CC=C(O)C=C1)C(=O)N1CCC[C@H]1C1=NC(=CS1)C1=NC2=CS1)C(=O)N1CCC[C@H]1C(=O)NC(=C)C(=O)NC(=C)C(N)=O
BGC0000153	Stigmatella	stigmatellin	1	514.293	87.36	6.13762	7	1	NRP		0	0	0	0	20	COC(\C=C\C=C\C(\C)=C\C)C(C)C(OC)C(C)CCC1=C(C)C(=O)C2=C(OC)C=C(OC)C(O)=C2O1
BGC0000145	Salinispora	salinosporamide a	1	313.108	75.63	1.1328	4	2	Polyketide		1	0	0	0	21	[H][C@](O)([C@@]1([H])CCCC=C1)[C@@]12NC(=O)[C@H](CCCl)[C@]1(C)OC2=O
BGC0001358	Purpureocillium	leucinostatin a	2	1217.84	342.98	2.2774	14	11	Polyketide		2	0	0	0	20	CCC(C)/C=C/C(=O)N1CC(CC1C(=O)NC(CC(C)CC(CC(=O)CC)O)C(=O)NC(C(C(C)C)O)C(=O)NC(C)(C)C(=O)NC(CC(C)C)C(=O)NC(CC(C)C)C(=O)NC(C)(C)C(=O)NC(C)(C)C(=O)NCCC(=O)NC(C)CN(C)C)C
BGC0000258	Serratia	prodigiosin	1	323.2	53.17	2.97012	2	2	Polyketide		0	0	0	0	17	CCCCCC1=C(NC(=C1)/C=C\2/C(=C/C(=C/3\C=CC=N3)/N2)OC)C
BGC0001100	Streptomyces	lankacidin c	1	459.226	130	1.7177	7	3	NRP		1	0	0	0	15	[H][C@]12C[C@]([H])(O)\C=C\C(\C)=C\C[C@]([H])(O)\C=C\C(\C)=C\[C@@]([H])(NC(=O)C(C)=O)[C@](C)(C(=O)O1)C(=O)[C@@H]2C
BGC0001627	Mycobacterium	isonitrile lipopeptides	1	-1					NRP		1	0	0	0	5
BGC0001437	Pseudomonas	obafluorin	1	358.08	139	1.2725	7	3	NRP	Antibacterial	0	1	0	0	14	OC1=C(O)C(=CC=C1)C(=O)N[C@H]1[C@@H](CC2=CC=C(C=C2)N(=O)=O)OC1=O
BGC0000074	Streptomyces	herbimycin a	1	574.289	152.48	2.7133	9	2	Polyketide		1	0	0	0	30	CO[C@H]1C[C@H](C)[C@@H](OC)C2=CC(=O)C=C(NC(=O)\C(C)=C\C=C/[C@H](OC)[C@@H](OC(N)=O)\C(C)=C\[C@H](C)[C@H]1OC)C2=O
BGC0001183	Streptomyces	lobophorin a	1	1156.63	291.94	5.2549	20	7	Polyketide		1	0	0	0	60	C[C@H]1C[C@@H]([C@@H]([C@@H]2[C@@H]1[C@]3([C@@H](C=C2)/C(=C\C[C@@H](/C(=C\[C@@H]4C=C([C@@H](C[C@@]45C(=O)C(=C3O)C(=O)O5)C)CO)/C)O[C@H]6C[C@]([C@H]([C@H](O6)C)NC(=O)OC)(C)N)/C)C)O[C@H]7C[C@H]([C@H]([C@@H](O7)C)O)O[C@H]8C[C@H]([C@H]([C@@H](O8)C)O[C@@H]9C[C@H]([C@H]([C@@H](O9)C)OC)O)O)C
BGC0001362	Phaeobacter	tropodithietic acid	1	211.96	54.37	2.0212	4	1	Other		0	0	0	0	19	C1=CC(=O)C(=C2C(=C1)SS2)C(=O)O
BGC0000099	Talaromyces	monascorubrin	1	382.178	69.67	4.4113	5	0	Polyketide		2	0	0	0	1	CCCCCCCC(=O)C1=C2C=C3C=C(OC=C3C(=O)[C@@]2(OC1=O)C)/C=C/C
BGC0001327	Micromonospora	rakicidin a	2	606.399	168.13	3.1066	7	4	NRP		1	0	0	0	9	CC(C)CCCCCCCCCCCC(C)C1OC(=O)C(NC(=O)CN(C)C(=O)\C=C/C(=C)NC(=O)C1C)C(O)C(N)=O
BGC0000125	Streptomyces	pimaricin	1	665.305	230.99	0.1197	13	7	Polyketide		1	0	0	0	17	C[C@@H]1C/C=C/C=C/C=C/C=C/[C@@H](C[C@H]2[C@@H]([C@H](C[C@](O2)(C[C@H](C[C@@H]3[C@H](O3)/C=C/C(=O)O1)O)O)O)C(=O)O)O[C@H]4[C@H]([C@H]([C@@H]([C@H](O4)C)O)N)O
BGC0001423	Myxococcus	myxochromide c	1	774.432	197.31	3.0051	8	4	NRP		0	0	0	0	22	C1(=O)N[C@@H](CC(C)C)C(N2CCC[C@H]2C(=O)N[C@@H](CCC(=O)N)C(=O)O[C@H](C)[C@H](N(C)C(=O)/C=C/C=C/C=C/C=C/C=C/C=C/C=C/C=C/C)C(=O)N[C@@H]1C)=O
BGC0000280	Pseudomonas	2,4-diacetylphloroglucinol	1	210.053	94.83	1.2086	5	3	Polyketide	Antifungal	0	0	1	0	6	CC(=O)C1=C(C(=C(C=C1O)O)C(=O)C)O
BGC0000579	Streptomyces	ssv-2083	1	2082.83					RiPP		1	0	0	0	11
BGC0000498	Streptococcus	bovicin hj50	1	-1					RiPP		1	0	0	0	15
BGC0000617	Bacillus	coagulin	1	-1					RiPP		1	0	0	0	5
BGC0000601	Bacillus	sporulation killing factor	1	2781.3					RiPP	Antibacterial	1	1	0	0	7
BGC0000654	Streptomyces	phenalinolactone a	1	715.357	183.07	4.41152	12	4	Terpene	Antibacterial	1	1	0	0	35	[H][C@]12CC[C@@]3(C)[C@H](C4=C(O)C(=O)OC4O)C(C)=CC[C@@]3([H])[C@]1(C)[C@@H](O)C[C@@H](OC(C)=O)C2(CO[C@H]1CC[C@@H](OC)[C@H](C)O1)COC(=O)C1=CC=C(C)N1
BGC0000759	Sphingomonas	diutan polysaccharide	1	-1					Saccharide		0	0	0	0	24
BGC0000774	Xanthomonas	lipopolysaccharide	1	4897.15					Saccharide		0	0	0	0	35
BGC0000207	Streptomyces	chartreusin	1	640.179	207.72	1.36982	14	5	Polyketide		1	0	0	0	13	C[C@@H]1[C@@H]([C@@H]([C@H]([C@@H](O1)OC2=CC=CC3=C2C4=C5C6=C(C=CC(=C6C(=O)O4)C)OC(=O)C5=C3O)O[C@@H]7[C@@H]([C@H]([C@H]([C@H](O7)C)O)OC)O)O)O
BGC0001585	Escovopsis	melinacidin iv	1	728.085	186.22	-0.7244	14	6	Alkaloid		2	0	0	0	11	[H][C@]12NC3=C(C=CC=C3)C1([C@H](O)C13SS[C@@](CO)(N(C)C1=O)C(=O)N23)[C@]12[C@H](O)C34SS[C@@](CO)(N(C)C3=O)C(=O)N4[C@@]1([H])NC1=C2C=CC=C1
BGC0001128	Photorhabdus	luminmide	1	-1					NRP		0	0	0	0	1
BGC0001124	Aspergillus	pyranonigrin e	1	315.147	70.75	3.5514	4	1	Polyketide		2	0	0	0	1	CCCCC\C=C\C=C\C1=C(O)C(=O)C2=C(O1)C(=C)N(C)C2=O
BGC0000211	Streptomyces	chrysomycin	1	496.173	138.82	3.06322	9	4	Polyketide		1	0	0	0	35	C[C@@H]1[C@@H]([C@@]([C@H]([C@@H](O1)C2=C3C(=C(C=C2)O)C(=CC4=C3OC(=O)C5=CC(=CC(=C54)OC)C)OC)O)(C)O)O
BGC0000640	Enterobacteriaceae	carotenoid	1	738.674	99.38	11.5564	6	4	Terpene		0	0	0	0	6	C[C@H](CCCCC(C)CCC[C@@H](C)CCCC(C)CCC=C(C)C)CCC[C@H](C)CCC[C@H](C)CCCC(C)(C)O[C@@H]1[C@@H]([C@H]([C@@H]([C@H](O1)CO)O)O)O
BGC0001700	Streptomyces	niphimycins c-e	1	1141.72	372.07	3.3038	18	14	Polyketide		1	0	0	0	31	CC1CCC(C(C(CC(C(/C=C/C(C(C(=O)O[C@@H](C(/C=C/C=C/C(C(C(CC(CC(CC2CC(C(C(O2)(CC1O)O)O)O)OC(=O)CC(=O)O)O)O)C)O)C)[C@@H](C)C[C@@H](C)CCC/C=C/CCCNC(=NC)N)C)O)C)O)O)C)O
BGC0000448	Streptomyces	tomaymycin	1	304.142	71.03	1.9596	5	2	NRP		1	0	0	0	17	COC1NC2=C(C=C(OC)C(O)=C2)C(=O)N2CC(CC12)=CC
BGC0000592	Microcystis	microviridin b	1	1722.76	594.09	-2.9414	23	19	RiPP	Inhibitor	0	0	0	0	5	CC(C)C[C@@H]1NC(=O)[C@@H](NC(=O)[C@@H](NC(=O)CNC(=O)[C@H](CC2=CC=CC=C2)NC(C)=O)[C@@H](C)O)[C@@H](C)OC(=O)C[C@@H]2NC(=O)[C@@H]3COC(=O)CC[C@H](NC(=O)[C@H](CC4=CC5=CC=CC=C5N4)NC2=O)C(=O)N[C@@H](CCC(=O)NCCCC[C@H](NC1=O)C(=O)N[C@@H](CC1=CC=C(O)C=C1)C(=O)N1CCC[C@H]1C(=O)N3)C(=O)N[C@@H](CC1=CC=C(O)C=C1)C(O)=O
BGC0000247	Streptomyces	mithramycin	1	1084.47	358.2	-0.24928	24	11	Polyketide	Cytotoxic	1	0	0	0	35	C[C@@H]1[C@H]([C@@H](C[C@@H](O1)O[C@@H]2C[C@@H](O[C@@H]([C@H]2O)C)OC3=CC4=CC5=C(C(=O)[C@H]([C@@H](C5)[C@@H](C(=O)[C@H]([C@@H](C)O)O)OC)O[C@H]6C[C@H]([C@@H]([C@H](O6)C)O)O[C@H]7C[C@H]([C@H]([C@H](O7)C)O)O[C@H]8C[C@]([C@@H]([C@H](O8)C)O)(C)O)C(=C4C(=C3C)O)O)O)O
BGC0000528	Clavibacter	michiganin a	1	2143.97	800.77	-7.07023	30	30	RiPP		1	0	0	0	7	CC[C@H](C)[C@@H]1NC(=O)[C@H](CCSC[C@@H]2NC(=O)[C@@H](NC(=O)[C@@H](NC(=O)[C@H](CCSC[C@H](NC(=O)[C@H](C)NC2=O)C(=O)N[C@@H](CCCNC(N)=N)C(O)=O)NC(=O)CNC(=O)[C@H](CS)NC(=O)[C@H](CCC(O)=O)NC1=O)[C@@H](C)CC)[C@@H](C)CC)NC(=O)[C@H](CC(C)C)NC(=O)C(\NC(=O)[C@@H]1CSC[C@H](NC(=O)[C@@H](N)CO)C(=O)N[C@@H](CO)C(=O)NCC(=O)N[C@@H](CC2=CNC3=C2C=CC=C3)C(=O)N[C@@H](CC(C)C)C(=O)N1)=C\C
BGC0001763	Streptomyces	rufomycin	1	1011.58	254.42	5.1774	11	6	NRP		1	0	0	0	20	C/C=C/C[C@H]1C(=O)N[C@H](C(=O)N([C@H](C(=O)N[C@H](C(=O)N[C@H](C(=O)N([C@H](C(=O)NC(C(=O)N1)CC(C)C)CC(C)C)C)C)CC2=CC(=C(C=C2)O)[N+](=O)[O-])CC(C)C)C)CC3=CN(C4=CC=CC=C43)C(C)(C)C=C
BGC0001777	Escovopsis	shearinine d	1	599.325	101.01	5.9563	6	3	Terpene		2	0	0	0	6	[H][C@]12CC3=C(NC4=CC5=C(C=C34)[C@@H](O)[C@@]3([H])C5=CC(C)(C)OC3(C)C)[C@]1(C)[C@@]1(C)CC[C@@]34O[C@@]([H])(C(=O)C=C3[C@]1(O)CC2)C(C)(C)O4
BGC0000130	Streptomyces	pyrrolomycin a	4	179.949	58.93	2.2297	2	1	Polyketide		1	0	0	0	35	C1=C(C(=C(N1)Cl)Cl)[N+](=O)[O-]
BGC0000012	Alternaria	alternapyrone	1	428.329	50.44	8.14724	3	1	Polyketide		2	0	0	0	5	CCC(C)/C=C(\C)/CCCC(C)/C=C(\C)/C=C(\C)/CC(C)C1=C(C(=C(C(=O)O1)C)O)C
BGC0001258	Glarea	1,3,6,8-tetrahydroxynaphthalene	1	192.042	80.92	1.6622	4	4	Polyketide		2	0	0	0	1	C1=C2C=C(C=C(C2=C(C=C1O)O)O)O
BGC0000924	Pseudomonas	pyrrolnitrin	1	255.981	58.93	3.8967	2	1	Other		0	0	0	0	4	ClC1=CNC=C1C1=CC=CC(Cl)=C1N(=O)=O
BGC0000733	Klebsiella	capsular polysaccharide	1	1004.31	523.2	-14.0081	31	20	Saccharide		0	0	0	0	17	C(C1C(C(C(C(O1)OC2C(C(OC(C2OC3C(C(C(C(O3)C(=O)O)OC4C(C(C(C(O4)CO)O)O)O)O)O)OC5C(OC(C(C5O)O)OCC6C(C(C(C(O6)O)O)O)O)CO)CO)O)O)O)O)O
BGC0001014	Ralstonia	micacocidin	1	565.21	105.72	4.7359	9	3	NRP	Antibacterial,Siderophore	0	1	0	1	10	OC1=C(C2=N[C@]([C@@]3([H])SC[C@]([C@@H](O)C(C)(C)C4=N[C@](C(O)=O)(C)CS4)([H])N3C)([H])CS2)C(CCCCC)=CC=C1
BGC0001886	Claviceps	secalonic acids	1	-1					Polyketide		2	0	0	0	16
BGC0000016	Streptomyces	amphotericin b	1	923.488	319.61	0.7117	17	12	Other	Antifungal	1	0	1	0	3	C[C@H]1/C=C/C=C/C=C/C=C/C=C/C=C/C=C/[C@@H](C[C@H]2[C@@H]([C@H](C[C@](O2)(C[C@H](C[C@H]([C@@H](CC[C@H](C[C@H](CC(=O)O[C@H]([C@@H]([C@@H]1O)C)C)O)O)O)O)O)O)O)C(=O)O)OC3C(C(C(C(O3)C)O)N)O
BGC0000501	Catenulispora	catenulipeptin	1	2397.06	1015.2	-15.2492	36	34	RiPP		1	0	0	0	5	CC[C@H](C)[C@@H]1NC(=O)CNC(=O)[C@H](C[C@@]2(CSC[C@H](NC(=O)[C@H](CC(C)C)NC(=O)[C@H](CC(C)C)NC2=O)C(=O)N[C@@H](CC(O)=O)C(=O)N[C@@H](CC(C)C)C(O)=O)NC1=O)NC(=O)[C@H](CC1=CN=CN1)NC(=O)CNC(=O)[C@H](CC(N)=O)NC(=O)[C@@H]1CSC[C@@]2(C[C@H](NC(=O)[C@H](CC(O)=O)NC(=O)CNC(=O)CNC(=O)CNC(=O)CNC(=O)[C@H](CC3=CN=CN3)NC(=O)CN)C(=O)NCC(=O)N[C@@H](CC(C)C)C(=O)N2)C(=O)N[C@@H](C(C)C)C(=O)N[C@@H]([C@@H](C)O)C(=O)NCC(=…
BGC0001741	Phyllosticta	phyllostictine a	2	325.189	79.23	0.9626	5	2	NRP		2	0	0	0	10	CCN1C(=O)\C2=C3/CO[C@](OC)([C@H]3O)[C@@H](O)CCCCC[C@@]12C
BGC0000866	Burkholderia	polyhydroxyalkanoate	1	-1					Other		0	0	0	0	4
BGC0000104	Penicillium	mycophenolic acid	1	320.126	93.06	2.73322	5	2	Polyketide	Inhibitor	2	0	0	0	8	COC1=C(C\C=C(/C)CCC(O)=O)C(O)=C2C(=O)OCC2=C1C
BGC0001668	Aspergillus	eq-4	1	266.094	46.53	2.5581	3	1	NRP		2	0	0	0	3	OC1OC(=O)C(=C1CC1=CC=CC=C1)C1=CC=CC=C1
BGC0000760	Acinetobacter	emulsan	1	-1					Saccharide		0	0	0	0	22
BGC0000632	Nocardia	brasilicardin a	1	892.457	286.25	1.3502	16	9	Terpene		1	0	0	0	13	[H][C@@]1(O[C@H]2C[C@]3(C)[C@]([H])(CC[C@@]4(C)[C@@H](C[C@H](OC)[C@H](N)C(O)=O)C(C)=CC[C@]34[H])C(C)(C)[C@@H]2O)O[C@@H](C)[C@H](OC(=O)C2=CC=CC(O)=C2)[C@@H](O[C@]2([H])O[C@H](CO)[C@@H](O)[C@H](O)[C@H]2NC(C)=O)[C@H]1O
BGC0001373	Sordaria	sordarin	1	492.272	122.52	2.4092	7	3	Polyketide		2	0	0	0	34	C[C@@H]1CC[C@@H]2[C@@H]1C[C@@]3([C@@H]4C[C@]2([C@]3(C(=C4)C(C)C)C(=O)O)C=O)CO[C@H]5[C@H]([C@@H]([C@@H]([C@H](O5)C)OC)O)O
BGC0000694	Bacillus	butirosin	1	787.231	523.91	-10.7401	20	16	Saccharide		1	0	0	0	16	C1[C@@H]([C@H]([C@@H]([C@H]([C@@H]1NC(=O)C(CCN)O)O)O[C@H]2[C@@H](C([C@H](O2)CO)O)O)O[C@@H]3[C@@H]([C@H]([C@@H]([C@H](O3)CN)O)O)N)N.O.O.OS(=O)(=O)O.OS(=O)(=O)O
BGC0001145	Streptomyces	cyclothiazomycin b1	1	1527.34	513.14	0.01857	27	14	RiPP		1	0	0	0	12	[H][C@]12CSC(=N1)C1=CSC(=N1)C1=CSC(=N1)C(=C)NC(=O)[C@@]1([H])CSC(=N1)C1=CSC(=N1)C1=CC=C3C(=N1)[C@H](C)NC(=O)[C@]1([H])CCCN1C(=O)\C(NC(=O)CNC(=O)[C@H](CCCNC(N)=N)NC(=O)C(C)(NC(=O)\C(NC(=O)C1CSC(=N1)[C@H](CC(N)=O)NC3=O)=C\C)SC[C@H](NC2=O)C(O)=O)=C\C
BGC0000266	Streptomyces	collinomycin	1	536.095	182.94	2.8672	12	3	Polyketide		1	0	0	0	25	COC(=O)C1=CC2=CC(CCC3=CC4=C(O3)C(=O)C3=C(O)C(OC)=CC(OC)=C3C4=O)=C(O)C(O)=C2C(=O)O1
BGC0000627	Aspergillus	ustiloxin b	1	645.232	286.94	-2.9645	12	10	RiPP		2	0	0	0	19	[H][C@](N)(C[C@H](O)C[S@@](=O)C1=C2C=C(O[C@](C)(CC)[C@]([H])(NC(=O)[C@]([H])(C)NC(=O)[C@@]([H])(NC)[C@@H]2O)C(=O)NCC(O)=O)C(O)=C1)C(O)=O
BGC0001034	Sorangium	pellasoren	1	431.304	64.63	5.4941	4	1	NRP	Cytotoxic	0	0	0	0	12	CC/C=C(OC)/C(N[C@@H](C)/C=C(C)/C=C(C)/C=C/C[C@@H]([C@H]1OC([C@H](C)C[C@@H]1C)=O)C)=O
BGC0001030	Penicillium	ochratoxin a	1	403.082	112.93	2.5727	5	3	NRP		2	0	0	0	5	[H][C@@](CC1=CC=CC=C1)(NC(=O)C1=C(O)C2=C(C[C@@]([H])(C)OC2=O)C(Cl)=C1)C(O)=O
BGC0001926	Talaromyces	chrodrimanin b	1	-1					Polyketide		2	0	0	0	10
BGC0001852	Streptomyces	komodoquinone b	1	-1					Polyketide		1	0	0	0	41
BGC0001506	Streptomyces	anantin b1	2	1811.81	660.02	-5.1692	22	23	RiPP		1	0	0	0	5	CC[C@H](C)[C@H]1C(=O)NCC(=O)N[C@H](C(=O)NCC(=O)N[C@H](C(=O)N[C@@H](CC(=O)NCC(=O)N[C@H](C(=O)N1)CC2=CC=CC=C2)C(=O)N[C@@H]([C@@H](C)CC)C(=O)N[C@@H](CC3=CC=CC=C3)C(=O)NCC(=O)N[C@@H](CC4=CN=CN4)C(=O)N[C@@H](CC5=CC=C(C=C5)O)C(=O)N[C@@H](CO)C(=O)NCC(=O)NCC(=O)N[C@@H](CC6=CC=CC=C6)C(=O)O)CC(=O)N)CC7=CNC8=CC=CC=C87
BGC0001396	Streptomyces	aldgamycin j	4	732.393	212.43	0.7793	15	5	Polyketide		1	0	0	0	38	CO[C@@H]1[C@H](O)[C@@H](C)O[C@@H](OCC2C3OC3CCC(=O)[C@@](C)(O)CC(C)C(O[C@@H]3O[C@H](C)C[C@](O)([C@H](C)O)[C@H]3O)C(C)\C=C\C(=O)OC2C)[C@@H]1OC
BGC0001494	Acinetobacter	acinetodin	1	-1					RiPP		0	0	0	0	5
BGC0001495	Actinoallomurus	actinoallolide a	1	564.366	130.36	4.6829	8	3	Polyketide		1	0	0	0	10	CCC1C(=O)C2(C)CC(C)=CCC(OC(=O)CC1(O)O2)C(C)C(O)C(C)CC(C)=CC(C)C(O)C(C)C(=O)CC
BGC0001049	Beauveria	tenellin	1	369.158	99.76	3.8951	6	3	NRP		2	0	0	0	4	CCC(C)\C=C(/C)\C=C\C(=O)C1=C(O)C(=CN(O)C1=O)C1=CC=C(O)C=C1
BGC0001299	Sorangium	chlorotonil a	1	478.168	60.44	5.6491	4	0	Polyketide		0	0	0	0	19	[H][C@@]12CC(C)=C[C@@H](C)[C@@]1([H])[C@]1([H])C(=O)C(Cl)(Cl)C(=O)[C@H](C)C(=O)O[C@@H](C)\C=C\C=C/[C@@H](C)[C@]1([H])C=C2
BGC0001162	Moorea	1-heptadecene	1	238.266	0	6.6537	0	0	Polyketide		0	0	0	0	2	CCCCCCCCCCCCCCCC=C
BGC0001237	Salinispora	thiolactomycin	1	210.071	37.3	2.9828	3	1	Polyketide		1	1	0	0	10	C\C(C=C)=C/[C@@]1(C)SC(=O)C(C)=C1O
BGC0000757	Avibacterium	capsular polysaccharide	1	-1					Saccharide		0	0	0	0	5
BGC0000820	Streptomyces	physostigmine	1	275.163	44.81	1.7739	4	1	Alkaloid	Inhibitor	1	0	0	0	8	[H][C@]12N(C)CC[C@@]1(C)C1=C(C=CC(OC(=O)NC)=C1)N2C
BGC0001052	Streptomyces	tirandamycin	1	417.179	114.46	1.5125	8	2	NRP	Antibacterial	1	1	0	0	15	C[C@H]1[C@@H]2C(=O)[C@H]3[C@](O3)([C@@](O2)(O[C@@H]1[C@H](C)/C=C(\C)/C=C/C(=O)C4=C(NCC4=O)O)C)C
BGC0001910	Streptomyces	cyslabdan	1	-1					Terpene		1	0	0	0	11
BGC0000111	Streptomyces	neocarzilin a	2	322.029	37.3	5.0823	2	1	Polyketide		1	0	0	0	14	CCC(C)\C=C\C=C\C=C\C(\O)=C\C(=O)C(Cl)(Cl)Cl
BGC0000373	Streptomyces	holomycin	1	213.987	61.96	1.5611	4	2	NRP		1	0	0	0	13	CC(=O)NC1=C2SSC=C2NC1=O
BGC0001026	Metarhizium	ng-391	1	417.179	125.46	1.0182	7	3	NRP		2	0	0	0	6	COC(=O)\C(=C\C)\C=C(/C)\C=C\C=C\C=C(/C)C(=O)[C@]12O[C@H]1[C@@](O)(CCO)NC2=O
BGC0000805	Streptomyces	moenomycin	1	1581.66	607.67	-2.0277	32	18	Saccharide	Antibacterial	1	1	0	0	3	[H][C@](COP(O)(=O)O[C@H]1O[C@H](C(N)=O)[C@@](C)(O)[C@H](OC(N)=O)[C@H]1O[C@@H]1O[C@H](CO[C@@H]2O[C@H](CO)[C@@H](O)[C@H](O)[C@H]2O)[C@@H](O[C@@H]2O[C@H](C)[C@@H](O[C@@H]3O[C@@H]([C@H](O)[C@H](O)[C@H]3O)C(=O)NC3=C(O)CCC3=O)[C@H](O)[C@H]2NC(C)=O)[C@H](O)[C@H]1NC(C)=O)(OC\C=C(\C)CC\C=C\C(C)(C)CCC(=C)C\C=C(/C)CCC=C(C)C)C(O)=O
BGC0001539	Streptomyces	cattlecin	1	-1					RiPP		1	0	0	0	4
BGC0001743	Lactobacillus	plantaricyclin	1	-1					RiPP		1	0	0	0	7
BGC0001739	Streptomyces	phosphonoacetic acid	1	139.987	94.83	-0.7513	2	3	Other		1	0	0	0	13	C(C(=O)O)P(=O)(O)O
BGC0000073	Streptomyces	halstoctacosanolide a	1	844.534	211.28	5.9117	12	7	Polyketide		1	0	0	0	9	CCC(O)C(C)C(O)CC(O)C(O)\C=C(/C)CC(C)C1CC(O)C(C)\C=C\C=C\CC(C)C(=O)CC2CCC(C)C(O)(C\C=C(\C)/C=C(C)/C(O)C(=O)\C=C(C)\C(=O)O1)O2
BGC0000997	[Polyangium]	glidobactin	1	520.326	156.86	1.1415	6	6	NRP		0	0	0	0	19	CCCCCCC/C=C/C=C/C(=O)N[C@@H]([C@@H](C)O)C(=O)N[C@H]1C[C@H](CCNC(=O)/C=C\[C@@H](NC1=O)C)O
BGC0000900	Aspergillus	ferrichrome	1	673.303	296.22	-4.5334	12	9	Other		2	0	0	1	2	CC(=O)N(CCC[C@H]1C(=O)NCC(=O)NCC(=O)NCC(=O)N[C@H](C(=O)N[C@H](C(=O)N1)CCCN(C(=O)C)O)CCCN(C=O)O)O
BGC0000809	Actinomadura	at2433-a1	1	678.209	167.74	2.6543	11	5	Alkaloid		1	0	0	0	28	CN[C@H]1CO[C@H](C[C@@H]1O)OC[C@H]1O[C@H]([C@H](O)[C@@H](O)[C@@H]1OC)N1C2=C3NC4=C(C=CC=C4)C3=C3C(=O)N(C)C(=O)C3=C2C2=C1C(Cl)=CC=C2
BGC0001925	Streptomyces	altemicidin	3	-1					Alkaloid		1	0	0	0	18
BGC0000051	Kitasatospora	ebelactone a	2	338.246	63.6	3.7687	4	1	Polyketide		1	0	0	0	10	CC[C@@H](C)[C@H]([C@H](C)C(=O)[C@H](C)/C=C(\C)/C[C@H](C)[C@H]1[C@@H](C(=O)O1)C)O
BGC0000181	Bacillus	macrolactin h	1	402.241	86.99	3.6922	5	3	Polyketide		1	0	0	0	10	CC1CCC\C=C/C=C/C(O)CC(O)C\C=C/C=C/C(O)C\C=C\C=C/C(=O)O1
BGC0000284	Azotobacter	phenolic lipids	1	-1					Polyketide		0	0	0	0	4
BGC0000323	Pseudomonas	cichofactin a	2	1245.81	434.29	1.929	14	14	NRP	Antibacterial,Antifungal,Surfactant	0	1	1	0	6	O=C(N[C@@H](CC(C)C)C(N[C@@H](CC(C)C)C(N[C@@H](CCC(N)=O)C(N[C@@H](CC(C)C)C(N[C@@H](CCC(N)=O)C(N[C@@H](C(C)C)C(N[C@@H](CC(C)C)C(N[C@@H](CC(C)C)C(O)=O)=O)=O)=O)=O)=O)=O)=O)[C@H](CC1=CNC=N1)NC(CC(O)CCCCCCC)=O
BGC0001868	Xenorhabdus	iodinin	1	-1					Other	Antibacterial,Cytotoxic	0	1	0	0	11
BGC0001866	Byssochlamys	viriditoxin	1	662.164	204.58	3.7888	14	4	Polyketide	Antibacterial,Cytotoxic	2	1	0	0	9	COC1=C(C2=CC3=C(C(=C2C(=C1)O)O)C(=O)O[C@@H](C3)CC(=O)OC)C4=C(C=C(C5=C(C6=C(C[C@H](OC6=O)CC(=O)OC)C=C54)O)O)OC
BGC0001397	Streptomyces	lidamycin	1	843.241	217.8	2.8038	15	5	NRP		1	0	0	0	58	CC1([C@H]([C@H]([C@H]([C@@H](O1)O[C@]23C=CC=C2C#C/C/4=C\C#C[C@H]3OC5=C(C=C(C=C5Cl)[C@H](CC(=O)OC[C@@H]4OC(=O)C6=CC(=CC7=C6NC(=O)C(=C)O7)OC)N)O)O)O)N(C)C)C
BGC0001365	Claviceps	clapurines	1	-1					NRP		2	0	0	0	11
BGC0000533	Streptococcus	mutacin iii	1	-1					RiPP		1	0	0	0	8
BGC0000802	Sinorhizobium	succinoglycan	1	-1					Saccharide		0	0	0	0	9
BGC0001127	Janthinobacterium	jagaricin	1	1180.61	440.89	-1.3902	17	15	NRP		0	0	0	0	15	CCCCCCCCCCC[C@H](CC(=O)N/C(=C\C)/C(=O)N[C@H]1[C@H](OC(=O)[C@@H](NC(=O)[C@@H](NC(=O)/C(=C/C)/NC(=O)CNC(=O)[C@H](NC(=O)[C@H](NC(=O)[C@H](NC1=O)[C@@H](C)O)CC2=CC=C(C=C2)O)CCC(=O)N)[C@H](C)O)CC3=CN=CN3)C)O
BGC0001426	Myxococcus	myxochromide a	1	845.469	226.41	2.5098	9	5	NRP		0	0	0	0	22	CN([C@H]1[C@@H](C)OC(=O)CC[C@H](NC(=O)[C@H](NC(=O)[C@H]2CCCN2C(=O)[C@H](CC(C)C)NC(=O)[C@@H](NC1=O)C)C)C(=O)N)C(=O)/C=C/C=C/C=C/C=C/C=C/C=C/C=C/C=C/C
BGC0000940	Streptomyces	desferrioxamin b	2	560.353	205.84	0.9221	9	6	Other		1	0	0	0	6	CC(=O)N(O)CCCCCNC(=O)CCC(=O)N(O)CCCCCNC(=O)CCC(=O)N(O)CCCCCN
BGC0000577	Sphingobium	sphingonodin ii	1	-1					RiPP		0	0	0	0	7
BGC0000751	Actinobacillus	capsular polysaccharide	1	496.119	265.52	-5.2059	14	10	Saccharide		0	0	0	0	4	CCCO[C@@H]1C([C@]([C@H]([C@H](O1)CO)O[C@H]2[C@@H]([C@H]([C@H]([C@H](O2)CO)O)O)O)(O)OP(=O)(O)O)(O)O
BGC0000741	Streptococcus	capsular polysaccharide	1	1322.45	660.55	-16.7828	38	25	Saccharide		1	0	0	0	7	CC(=O)N[C@@H]1[C@H](C[C@@](O[C@H]1[C@@H]([C@@H](CO)O)O)(C(=O)O)O[C@H]2[C@H]([C@H](O[C@H]([C@@H]2O)O[C@@H]3[C@H](O[C@@H]([C@@H]([C@H]3O)NC(=O)C)OC[C@@H]4[C@H]([C@@H]([C@H]([C@H](O4)O[C@H]5[C@H](O[C@H]([C@@H]([C@H]5O[C@H]6[C@@H]([C@H]([C@@H]([C@H](O6)CO)O)O)O)O)O[C@@H]7[C@H](O[C@H]([C@@H]([C@H]7O)O)O)CO)CO)O)O)O)CO)CO)O)O
BGC0000748	Streptococcus	capsular polysaccharide	1	1322.45	660.55	-16.7828	38	25	Saccharide		1	0	0	0	7	CC(=O)N[C@@H]1[C@H](C[C@@](O[C@H]1[C@@H]([C@@H](CO)O)O)(C(=O)O)O[C@H]2[C@H]([C@H](O[C@H]([C@@H]2O)O[C@@H]3[C@H](O[C@@H]([C@@H]([C@H]3O)NC(=O)C)OC[C@@H]4[C@H]([C@@H]([C@H]([C@H](O4)O[C@H]5[C@H](O[C@H]([C@@H]([C@H]5O[C@H]6[C@@H]([C@H]([C@@H]([C@H](O6)CO)O)O)O)O)O[C@@H]7[C@H](O[C@H]([C@@H]([C@H]7O)O)O)CO)CO)O)O)O)CO)CO)O)O
BGC0000196	Photorhabdus	aq-256	3	256.037	94.83	1.5788	5	3	Polyketide		0	0	0	0	8	Oc3cccc2C(=O)c1cc(O)cc(O)c1C(=O)c23
BGC0000977	Aspergillus	cyclopiazonic acid	1	336.147	73.4	2.8279	3	2	NRP		2	0	0	0	7	CC(=O)C1=C([C@@H]2[C@@H]3[C@@H](CC4=C5C3=CNC5=CC=C4)C(N2C1=O)(C)C)O
BGC0000397	Nostoc	nostocyclopeptide a2	1	790.401	261.72	-0.7733	10	8	NRP		0	0	0	0	7	CC[C@H](C)[C@@H]1NC(=O)[C@@H](CCC(N)=O)NC(=O)CNC(=O)[C@H](CC2=CC=C(O)C=C2)\N=C\[C@H](CC2=CC=CC=C2)NC(=O)[C@@H]2C[C@H](C)CN2C(=O)[C@H](CO)NC1=O
BGC0000286	Streptomyces	viguiepinol	1	288.245	20.23	5.1123	1	1	Polyketide		1	0	0	0	15	C[C@@]12CC[C@@H](C([C@H]1CC[C@@H]3C2=CC[C@](C3)(C)C=C)(C)C)O
BGC0000147	Sorangium	soraphen a	1	520.304	103.68	3.8027	8	2	Polyketide		0	0	0	0	13	C[C@H]1/C=C/[C@H]([C@H](CCCC[C@H](OC(=O)[C@H]([C@@]2([C@@H]([C@H]([C@@H]([C@H]1O2)C)O)OC)O)C)C3=CC=CC=C3)OC)OC
BGC0001984	Streptomyces	sarpeptin a	2	-1					NRP		1	0	0	0	12
BGC0000912	Streptomyces	melanin	1	318.064	99.86	1.32664	4	2	Other		1	0	0	0	2	CC1=C2C3=C(C4=CNC5=C(C(=O)C(=O)C(=C45)C3=CN2)C)C(=O)C1=O
BGC0000753	Actinobacillus	capsular polysaccharide	1	496.119	265.52	-5.2059	14	10	Saccharide		0	0	0	0	5	CCCO[C@@H]1C([C@]([C@H]([C@H](O1)CO)O[C@H]2[C@@H]([C@H]([C@H]([C@H](O2)CO)O)O)O)(O)OP(=O)(O)O)(O)O
BGC0000822	Lentzea	rebeccamycin	1	569.076	146.04	3.2459	8	5	Alkaloid	Cytotoxic	1	0	0	0	18	CO[C@@H]1[C@H](O[C@H]([C@@H]([C@H]1O)O)N2C3=C(C=CC=C3Cl)C4=C5C(=C6C7=C(C(=CC=C7)Cl)NC6=C42)C(=O)NC5=O)CO
BGC0000826	Streptomyces	staurosporine	1	466.2	69.45	4.354	6	2	Alkaloid		1	0	0	0	17	C[C@@]12[C@@H]([C@@H](C[C@@H](O1)N3C4=CC=CC=C4C5=C6C(=C7C8=CC=CC=C8N2C7=C53)CNC6=O)NC)OC
BGC0001542	Cercospora	cercosporin	1	534.153	151.98	2.8991	10	4	Polyketide		2	0	0	0	7	C[C@H](CC1=C(C(=C2C(=O)C=C3C4=C5C(=CC(=O)C6=C(C(=C(C(=C56)C1=C42)C[C@@H](C)O)OC)O)OCO3)O)OC)O
BGC0000020	Actinosynnema	maytansine	2	691.287	156.47	3.5344	10	2	Polyketide		1	0	0	0	41	C[C@@H]1[C@@H]2C[C@]([C@@H](/C=C/C=C(/CC3=CC(=C(C(=C3)OC)Cl)N(C(=O)C[C@@H]([C@]4([C@H]1O4)C)OC(=O)[C@H](C)N(C)C(=O)C)C)\C)OC)(NC(=O)O2)O
BGC0001077	Actinoplanes	alkyl-o-dihydrogeranyl-methoxyhydroquinones	1	-1					Terpene		1	0	0	0	7
BGC0000445	Micromonospora	thiocoraline	1	1156.24	298.02	1.2858	20	6	NRP	Cytotoxic	1	0	0	0	38	CSCC1N(C)C(=O)C2CSSCC(N(C)C(=O)CNC(=O)C(CSC1=O)NC(=O)C1=NC3=CC=CC=C3C=C1O)C(=O)N(C)C(CSC)C(=O)SCC(NC(=O)C1=C(O)C=C3C=CC=CC3=N1)C(=O)NCC(=O)N2C
BGC0000516	Geobacillus	geobacillin ii	1	3055.52					RiPP	Antibacterial	1	1	0	0	8
BGC0000043	Moorea	curacin a	1	373.244	21.59	6.3665	3	0	Polyketide		0	0	0	0	4	CO[C@H](CC\C(C)=C\C=C\CC\C=C/[C@H]1CSC(=N1)[C@@H]1C[C@@H]1C)CC=C
BGC0001194	Streptomyces	hitachimycin	1	477.252	95.86	4.8098	5	3	Polyketide		1	0	0	0	22	C/C/1=C/[C@H]2C[C@@H](C(=C2C(=O)C[C@H](CC/C=C/C[C@@H](NC(=O)/C=C\C=C1)C3=CC=CC=C3)O)O)OC
BGC0000213	Streptomyces	colabomycin e	1	556.221	145.33	3.3421	7	4	Polyketide	Antibacterial,Inhibitor	1	1	0	0	44	O=C(NC1=C[C@](/C=C/C=C/C=C/C=C/C(NC2=C(O)CCC2=O)=O)(O)C3C(O3)C1=O)/C=C/C=C/C=C/C=C\C=C\C
BGC0001116	Streptomyces	virginiamycin s1	1	823.354	224.72	1.204	11	4	NRP		1	0	0	0	18	[H][C@@]12CCCN1C(=O)[C@@]([H])(CC)NC(=O)[C@@]([H])(NC(=O)C1=C(O)C=CC=N1)[C@@]([H])(C)OC(=O)[C@@]([H])(NC(=O)[C@]1([H])CC(=O)CCN1C(=O)[C@]([H])(CC1=CC=CC=C1)N(C)C2=O)C1=CC=CC=C1
BGC0000202	Kibdelosporangium	azicemicin b	1	445.137	175.69	0.4298	10	6	Polyketide		1	0	0	0	45	COC1=C(O)C2=C(C=C1O)C(OC)=C1C(C(=O)CC3CC(O)(CC(=O)C13O)C1CN1)=C2O
BGC0000647	Rhodobacter	carotenoid	1	738.674	99.38	11.5564	6	4	Terpene		0	0	0	0	2	C[C@H](CCCCC(C)CCC[C@@H](C)CCCC(C)CCC=C(C)C)CCC[C@H](C)CCC[C@H](C)CCCC(C)(C)O[C@@H]1[C@@H]([C@H]([C@@H]([C@H](O1)CO)O)O)O
BGC0000279	Streptomyces	xantholipin	1	551.062	165.36	3.00482	10	3	Polyketide		1	0	0	0	49	[H][C@]12C[C@]3([H])C(=O)C4=C(C(=O)NC(C)=C4)C(=O)[C@]3(O)C3=C(O)C4=C(OC5=C(C=CC(Cl)=C5OC)C4=O)C(OCO1)=C23
BGC0001364	Actinomadura	cinnamycin b	1	-1					RiPP		1	0	0	0	19
BGC0000981	Aphanizomenon	cylindrospermopsin	1	415.116	177.18	-1.9049	9	5	NRP		0	0	0	0	25	C[C@H]1[C@H](C[C@@H]2C[C@@H](NC3=NC[C@H]1N23)[C@@H](C4=CC(=O)NC(=O)N4)O)OS(=O)(=O)O
BGC0000873	Saccharothrix	a-201a	1	802.339	250.93	-0.8016	19	6	Other		1	0	0	0	32	C[C@@H]1[C@H]([C@@H]([C@@H]([C@H](O1)OC/C(=C/2\[C@H]([C@@H]([C@@H](O2)OC3=CC=C(C=C3)/C=C(\C)/C(=O)N[C@@H]4[C@H](O[C@H]([C@@H]4O)N5C=NC6=C5N=CN=C6N(C)C)CO)O)O)/OC)O)OC)OC
BGC0001468	Streptomyces	bicyclomycin	1	302.111	148.35	-3.302	7	6	Other	Antibacterial	1	1	0	0	8	[H][C@](O)([C@@](C)(O)CO)[C@@]12NC(=O)[C@@](O)(NC1=O)C(=C)CCO2
BGC0001745	Pleurocapsa	plpa1	3	-1					RiPP		0	0	0	0	6
BGC0001412	Bacteroides	polysaccharide c	1	-1					Saccharide		0	0	0	0	25
BGC0001740	Streptomyces	phthoxazolin	1	290.163	89.35	2.1482	4	2	NRP		1	0	0	0	43	C\C(=C\C=C/C=C/CC1=CN=CO1)[C@@H](O)C(C)(C)C(N)=O
BGC0000065	Streptomyces	rustmicin	1	380.22	93.06	2.6995	6	2	Polyketide		1	0	0	0	30	CC[C@@H]1OC(=O)[C@H](C)C(=O)[C@](O)(CO)C\C(OC)=C\[C@@H](C)CC(=C)\C=C1/C
BGC0001936	Hypoxylon	nodulisporic acid f	1	-1					Terpene		2	0	0	0	13
BGC0000411	Pseudomonas	putisolvin	1	-1					NRP		0	0	0	0	8
BGC0000113	Streptomyces	niddamycin	1	783.441	196.82	2.6508	15	3	Polyketide		1	0	0	0	7	CC1C/C=C/C=C\C(=O)C(CC(C(C(C(CC(=O)O1)O)OC)OC2C(C(C(C(O2)C)OC3CC(C(C(O3)C)OC(=O)CC(C)C)(C)O)N(C)C)O)CC=O)C
BGC0001889	Thermobifida	fusilassin	1	-1					RiPP		1	0	0	0	4
BGC0000827	Salinispora	staurosporine	1	466.2	69.45	4.354	6	2	Alkaloid		1	0	0	0	17	C[C@@]12[C@@H]([C@@H](C[C@@H](O1)N3C4=CC=CC=C4C5=C6C(=C7C8=CC=CC=C8N2C7=C53)CNC6=O)NC)OC
BGC0001293	Streptomyces	cyclizidine	1	291.183	56.23	1.2347	4	2	Polyketide		1	0	0	0	17	[H][C@]12[C@@H]3O[C@@H]3CCN1[C@@H](\C=C(/C)\C=C\C1CC1)[C@H](O)[C@@]2(C)O
BGC0001956	Streptomyces	miharamycin a	2	-1					Polyketide		1	0	0	0	27
BGC0001728	Paenibacillus	paenilipoheptin	1	-1					NRP		1	0	0	0	26
BGC0001230	Streptomyces	salinamide a	8	1019.49	309.73	-0.3565	15	8	NRP	Antibacterial	1	1	0	0	14	[H][C@]1(NC(=O)[C@@H](CC2=CC=CC=C2)N(C)C(=O)[C@@H]2NC(=O)[C@@H](NC(=O)[C@H](NC(=O)[C@@H](C)[C@@H](O)C(C)C)[C@H](C)OC(=O)[C@@H](COC(=O)CNC(=O)\C=C\[C@@]3(CO3)[C@H](C)OC3=CC=C2C=C3)NC1=O)[C@H](C)CC)[C@H](C)O
BGC0001899	Leptosphaeria	abscisic acid	1	-1					Polyketide		2	0	0	0	8
BGC0000426	Paenibacillus	sevadicin	1	422.195	137.31	1.3545	4	5	NRP	Antibacterial	1	1	0	0	2	O=C(NC(C)C(NC(CC1=CNC2=C1C=CC=C2)C(O)=O)=O)C(N)CC3=CC=CC=C3
BGC0001496	Actinokineospora	actinokineosin	1	-1					RiPP		1	0	0	0	11
BGC0001449	Thermothelomyces	ucs1025a	1	359.173	83.91	1.2763	5	1	NRP	Antibacterial,Inhibitor	2	1	0	0	13	C[C@H]1C=C[C@H]2CCCC[C@@H]2[C@H]1C(=O)[C@H]3[C@H]4[C@@]5([C@@H](CCN5C3=O)C(=O)O4)O
BGC0000336	Streptomyces	daptomycin	1	1619.71	702.02	-5.6218	24	22	NRP		1	1	0	0	64	CCCCCCCCCC(=O)N[C@@H](CC1=CNC2=CC=CC=C21)C(=O)N[C@H](CC(=O)N)C(=O)N[C@@H](CC(=O)O)C(=O)N[C@H]3[C@H](OC(=O)[C@@H](NC(=O)[C@@H](NC(=O)[C@H](NC(=O)CNC(=O)[C@@H](NC(=O)[C@H](NC(=O)[C@@H](NC(=O)[C@@H](NC(=O)CNC3=O)CCCN)CC(=O)O)C)CC(=O)O)CO)[C@H](C)CC(=O)O)CC(=O)C4=CC=CC=C4N)C
BGC0000316	Saccharothrix	capreomycin ia	4	668.347	378.42	-8.2348	14	14	NRP		1	0	0	0	32	O=C(N[C@@H](CNC(C[C@H](N)CCCN)=O)C(N/C(C(N[C@@H]([C@H]1CCN=C(N)N1)C(NC[C@H](N)C(N2)=O)=O)=O)=C\NC(N)=O)=O)[C@@H]2CO
BGC0000389	Pseudomonas	massetolide a	1	1139.71	386.19	0.4863	15	13	NRP	Antifungal,Surfactant	0	0	1	0	2	CCCCCCC[C@@H](O)CC(=O)NC(CC(C)C)C(=O)NC(CCC(O)=O)C(=O)NC1C(C)OC(=O)C(NC(=O)C(CO)NC(=O)C(CC(C)C)NC(=O)C(CO)NC(=O)C(CC(C)C)NC(=O)C(NC1=O)C(C)CC)C(C)CC
BGC0001814	Streptomyces	ulleungmycin	1	-1					NRP		1	0	0	0	36
BGC0001096	Pseudomonas	fr901464	1	507.283	126.85	2.3124	8	3	NRP		0	0	0	0	28	C[C@H]1C[C@H]([C@H](O[C@H]1C/C=C(\C)/C=C/[C@@H]2[C@H]([C@@]3(C[C@@](O2)(C)O)CO3)O)C)NC(=O)/C=C\[C@H](C)OC(=O)C
BGC0000408	Paenibacillus	polymyxin	1	1300.72	565.26	-5.8976	20	20	NRP		1	1	0	0	5	CCC(C)CCCCC(=O)NC(CCN)C(=O)NC(C(C)O)C(=O)NC(CCN)C(=O)NC1CCNC(=O)C(NC(=O)C(NC(=O)C(NC(=O)C(NC(=O)C(NC(=O)C(NC1=O)CCN)CC2=CC=CC=C2)CC(C)C)CCN)CCN)C(C)O.OS(=O)(=O)O
BGC0000179	Sorangium	etnangien	1	840.539	194.21	7.4082	10	7	Polyketide	antiviral	0	0	0	0	16	COC1CCCC(O)CC(OC(=O)CC(O)C(C)C(O)C(C)C(O)C(C)C\C=C\C=C/C1)C(C)C(O)\C=C(/C)\C=C\C=C\C=C\C=C\C=C\CC(O)\C=C(/C)CCC(O)=O
BGC0000429	Streptomyces	rp-1776	1	1468.66	515.75	8.6348	19	16	NRP		1	0	0	0	49	C/C=C\C1=CC=CC=C1/C=C/C(=N[C@H]2C(OC(=O)[C@@H](N=C([C@H](N=C(C(N=C([C@H](N=C([C@@H](N=C([C@@H]3CCCN3C(=O)[C@@H](N=C(CN=C([C@@H](N=C([C@@H](N=C2O)C)O)[C@H](C)C(=O)O)O)O)C(C4=CC=CC=C4)O)O)C(C5=CC=C(C=C5)OC)O)O)C6=CNC7=CC=CC=C76)O)O)O)CC(C)C)O)[C@H](C(C)C)O)C)O
BGC0000675	Streptomyces	(+)-t-muurolol	1	222.198	20.23	3.7759	1	1	Terpene		1	0	0	0	5	CC1=C[C@@H]2[C@H](CC[C@@]([C@@H]2CC1)(C)O)C(C)C
BGC0001528	Phoma	betaestacin	1	-1					Terpene		2	0	0	0	4
BGC0000813	Nonomuraea	k-252a	1	467.148	94.72	3.6551	7	2	Alkaloid		1	0	0	0	14	[H][C@]12C[C@@](O)(C(=O)OC)[C@](C)(O1)N1C3=C(C=CC=C3)C3=C1C1=C(C4=C(C=CC=C4)N21)C1=C3CNC1=O
BGC0001601	Lactobacillus	gassericin-s	1	-1					RiPP		1	0	0	0	3
BGC0001937	Streptomyces	tubercidin	1	-1					Other		1	0	0	0	11
BGC0000268	Streptomyces	sch-47554	2	690.231	192.19	2.6034	13	3	Polyketide		1	0	0	0	55	CC1OC(CCC1OC1OC(C)C(=O)C=C1)C1=CC=C2C(=O)C3=C(C=C[C@]4(O)C[C@](C)(CC(=O)[C@]34O)OC3OC(C)C(=O)C=C3)C(=O)C2=C1O
BGC0001563	Cochliobolus	curvupallide-b	1	279.111	79.23	0.4107	5	2	NRP		2	0	0	0	18	CON1C(=C)C2=C([C@H](O)[C@@H](O)[C@@H](O2)\C=C\C=C\C)C1=O
BGC0001467	Fischerella	hapalosin	1	489.309	93.14	4.2969	6	1	NRP	Cytotoxic,P-glycoprotein-mediated multiple drug resistance	0	0	0	0	5	CCCCCCC[C@H]1OC(=O)C[C@@H](O)[C@H](CC2=CC=CC=C2)N(C)C(=O)[C@@H](OC(=O)[C@H]1C)C(C)C
BGC0001080	Streptomyces	endophenazine a	2	292.121	63.08	3.9899	3	1	Other	Antibacterial,Antifungal	1	1	1	0	18	CC(C)=CCC1=CC=CC2=NC3=CC=CC(C(O)=O)=C3N=C12
BGC0001928	Streptomyces	(2r,3s,4s)-5-fluoro-2,3,4-trihydroxypentanoic acid	1	-1					Other		1	0	0	0	8
BGC0001039	Streptomyces	pyridomycin	1	540.222	177.04	1.1776	10	4	NRP		1	1	0	0	26	CC/C(=C\1/C(=O)O[C@@H]([C@@H](C(=O)N[C@H]([C@@H]([C@H](C(=O)O1)C)O)CC2=CN=CC=C2)NC(=O)C3=C(C=CC=N3)O)C)/C
BGC0000085	Streptomyces	lankamycin	1	832.482	212.04	3.504	16	3	Polyketide		1	1	0	0	30	[H][C@@]1(OC(=O)[C@H](C)[C@@H](O[C@H]2C[C@@](C)(OC)[C@H](OC(C)=O)[C@H](C)O2)[C@H](C)[C@@H](O[C@@H]2O[C@H](C)C[C@H](OC)[C@H]2O)[C@@H](C)C[C@](C)(O)C(=O)[C@H](C)[C@@H](OC(C)=O)[C@H]1C)[C@@H](C)[C@H](C)O
BGC0001806	Pseudomonas	tolaasin a	1	1958.15	734.43	-4.5917	27	24	NRP		0	0	0	0	3	CCC(C)C1NC(=O)C(NC(=O)C(\NC(=O)C(NC(=O)C(CC(C)C)NC(=O)C(CCC(N)=O)NC(=O)C(NC(=O)C(NC(=O)C(CC(C)C)NC(=O)C(CO)NC(=O)C(NC(=O)C(CC(C)C)NC(=O)C(CO)NC(=O)C2CCCN2C(=O)C(\NC(=O)CCCC(O)=O)=C\C)C(C)C)C(C)C)C(C)C)C(C)C)=C\C)C(C)OC(=O)C(CCCCN)NC(=O)C(CCN)NC(=O)C(CCO)NC1=O

## Sheet: Table S2 - Transporter PFAMs
BGC	ABC_tran	BPD_transp_1	TonB_dep_Rec	ABC_membrane	ACR_tran	FecCD	ABC2_membrane	MatE	OEP	FtsX	MFS_3	MFS_1	ABC2_membrane_2	ABC2_membrane_3	MacB_PCD	ABC2_membrane_4	MMPL	BPD_transp_2	Multi_Drug_Res	PBP_like_2	SBP_bac_3	Peripla_BP_2	SBP_bac_1	SBP_bac_11	Peripla_BP_6	Peripla_BP_4	SBP_bac_5	SBP_bac_8
BGC0000001	2	2	0	0	0	0	0	0	0	0	0	1	0	0	0	0	0	0	0	0	0	0	0	0	0	0	1	0
BGC0000002	1	0	0	1	0	0	0	0	0	0	0	0	0	0	0	0	0	0	0	0	0	0	0	0	0	0	0	0
BGC0000004	0	0	0	0	0	0	0	0	0	0	0	1	0	0	0	0	0	0	0	0	0	0	0	0	0	0	0	0
BGC0000006	0	0	0	0	0	0	0	0	0	0	0	1	0	0	0	0	0	0	0	0	0	0	0	0	0	0	0	0
BGC0000007	0	0	0	0	0	0	0	0	0	0	0	1	0	0	0	0	0	0	0	0	0	0	0	0	0	0	0	0
BGC0000008	0	0	0	0	0	0	0	0	0	0	0	1	0	0	0	0	0	0	0	0	0	0	0	0	0	0	0	0
BGC0000009	0	0	0	0	0	0	0	0	0	0	0	1	0	0	0	0	0	0	0	0	0	0	0	0	0	0	0	0
BGC0000010	0	0	0	0	0	0	0	0	0	0	0	1	0	0	0	0	0	0	0	0	0	0	0	0	0	0	0	0
BGC0000019	2	0	0	0	0	0	0	0	0	0	0	0	0	0	0	0	0	0	0	0	0	0	0	0	0	0	0	0
BGC0000020	1	0	0	1	0	0	0	0	0	0	0	1	0	0	0	0	0	0	0	0	0	0	0	0	0	0	0	0
BGC0000022	0	0	0	0	0	0	0	0	0	0	0	1	0	0	0	0	0	0	0	0	0	0	0	0	0	0	0	0
BGC0000026	1	0	0	0	0	0	1	0	0	0	0	0	0	0	0	0	0	0	0	0	0	0	0	0	0	0	0	0
BGC0000029	0	0	0	0	0	0	0	0	0	0	0	1	0	0	0	0	0	0	0	0	0	0	0	0	0	0	0	0
BGC0000030	0	0	0	0	0	0	0	0	0	0	0	1	0	0	0	0	0	0	0	0	0	0	0	0	0	0	0	0
BGC0000032	0	0	0	0	0	0	0	0	0	0	0	0	0	0	0	0	2	0	0	0	0	0	0	0	0	0	0	0
BGC0000033	1	0	0	0	0	0	1	0	0	0	0	1	0	0	0	0	0	0	0	0	0	0	0	0	0	0	3	0
BGC0000034	1	0	0	0	0	0	1	0	0	0	0	0	0	0	0	0	0	0	0	0	0	0	0	0	0	0	0	0
BGC0000036	0	0	0	0	0	0	0	0	0	0	0	1	0	0	0	0	0	0	0	0	0	0	0	0	0	0	0	0
BGC0000038	0	0	0	0	0	0	0	0	0	0	0	1	0	0	0	0	0	0	0	0	0	0	0	0	0	0	0	0
BGC0000039	0	0	0	0	0	0	0	0	0	0	0	1	0	0	0	0	0	0	0	0	0	0	0	0	0	0	0	0
BGC0000042	1	0	0	0	0	0	1	0	0	0	0	0	0	0	0	0	0	0	0	0	0	0	0	0	0	0	0	0
BGC0000045	0	0	0	0	0	0	0	0	0	0	0	1	0	0	0	0	0	0	0	0	0	0	0	0	0	0	0	0
BGC0000046	0	0	0	0	0	0	0	0	0	0	0	1	0	0	0	0	0	0	0	0	0	0	0	0	0	0	0	0
BGC0000048	0	0	0	0	0	0	0	0	0	0	0	1	0	0	0	0	0	0	0	0	0	0	0	0	0	0	0	0
BGC0000052	1	0	0	0	0	0	1	0	0	0	0	0	0	0	0	0	0	0	0	0	0	0	0	0	0	0	0	0
BGC0000053	1	0	0	0	0	0	1	0	0	0	0	0	0	0	0	0	0	0	0	0	0	0	0	0	0	0	0	0
BGC0000060	0	0	0	0	0	0	0	0	0	0	0	1	0	0	0	0	0	0	0	0	0	0	0	0	0	0	0	0
BGC0000061	1	0	0	0	0	0	1	0	0	0	0	0	0	0	0	0	0	0	0	0	0	0	0	0	0	0	0	0
BGC0000062	2	0	0	2	0	0	0	0	0	0	0	0	0	0	0	0	0	0	0	0	0	0	0	0	0	0	0	0
BGC0000063	2	0	0	2	0	0	0	0	0	0	0	0	0	0	0	0	0	0	0	0	0	0	0	0	0	0	0	0
BGC0000070	0	0	0	0	0	0	0	0	0	0	0	1	0	0	0	0	0	0	0	0	0	0	0	0	0	0	0	0
BGC0000074	1	0	0	0	0	1	0	0	0	0	0	1	0	0	0	0	0	0	0	0	0	1	0	0	0	0	0	0
BGC0000076	0	0	0	0	0	0	0	0	0	0	0	1	0	0	0	0	0	0	0	0	0	0	0	0	0	0	0	0
BGC0000077	0	0	0	0	0	0	0	0	0	0	0	1	0	0	0	0	0	0	0	0	0	0	0	0	0	0	0	0
BGC0000078	1	0	0	0	0	0	1	0	0	0	0	0	0	0	0	0	0	0	0	0	0	0	0	0	0	0	0	0
BGC0000079	0	0	0	0	0	0	0	0	0	0	0	1	0	0	0	0	0	0	0	0	0	0	0	0	0	0	0	0
BGC0000081	1	0	0	0	0	0	0	0	0	0	0	2	0	0	0	0	0	0	0	0	0	0	0	0	0	0	0	0
BGC0000082	0	0	0	0	0	0	0	0	0	0	0	1	0	0	0	0	0	0	0	0	0	0	0	0	0	0	0	0
BGC0000084	1	0	0	0	0	0	0	0	0	0	0	2	0	0	0	0	0	0	0	0	0	0	0	0	0	0	0	0
BGC0000085	2	0	0	0	0	0	0	0	0	0	0	0	0	0	0	0	0	0	0	0	0	0	0	0	0	0	0	0
BGC0000086	0	0	0	0	0	0	0	0	0	0	0	1	0	0	0	0	0	0	0	0	0	0	0	0	0	0	0	0
BGC0000087	2	0	0	0	0	0	0	0	0	0	0	2	0	0	0	0	0	2	0	0	0	0	0	0	0	1	0	0
BGC0000088	0	0	0	0	0	0	0	0	0	0	0	2	0	0	0	0	0	0	0	0	0	0	0	0	0	0	0	0
BGC0000093	2	2	0	0	0	0	0	0	0	0	0	3	0	0	0	0	0	0	0	0	0	0	0	0	0	0	1	0
BGC0000097	0	0	0	0	0	0	0	0	0	0	0	1	0	0	0	0	0	0	0	0	0	0	0	0	0	0	0	0
BGC0000098	0	0	0	0	0	0	0	0	0	0	0	1	0	0	0	0	0	0	0	0	0	0	0	0	0	0	0	0
BGC0000100	0	0	0	0	0	0	0	0	0	0	0	1	0	0	0	0	0	0	0	0	0	0	0	0	0	0	0	0
BGC0000105	0	0	0	0	0	0	0	0	0	0	0	1	0	0	0	0	0	0	0	0	0	0	0	0	0	0	0	0
BGC0000108	2	0	0	2	0	0	0	0	0	0	0	0	0	0	0	0	0	0	0	0	0	0	0	0	0	0	0	0
BGC0000112	0	0	0	0	0	0	0	0	0	0	0	1	0	0	0	0	0	0	0	0	0	0	0	0	0	0	0	0
BGC0000115	2	0	0	2	0	0	0	0	0	0	0	0	0	0	0	0	0	0	0	0	0	0	0	0	0	0	0	0
BGC0000116	2	0	0	2	0	0	0	0	0	0	0	0	0	0	0	0	0	0	0	0	0	0	0	0	0	0	0	0
BGC0000120	2	0	0	0	0	0	2	0	0	0	0	1	0	0	0	0	0	0	0	0	0	0	0	0	0	0	0	0
BGC0000123	0	0	0	0	0	0	0	0	0	0	0	2	0	0	0	0	0	0	0	0	0	0	0	0	0	0	0	0
BGC0000125	2	0	0	2	0	0	0	0	0	0	1	0	0	0	0	0	0	0	0	0	0	0	0	0	0	0	0	0
BGC0000127	2	0	0	0	0	0	0	0	2	0	0	0	0	4	0	0	0	0	0	0	0	0	0	0	0	0	0	0
BGC0000128	2	0	0	0	0	0	0	0	2	0	0	0	0	4	0	0	0	0	0	0	0	0	0	0	0	0	0	1
BGC0000133	1	0	0	0	0	0	0	0	0	1	0	0	0	0	1	0	0	0	0	0	0	0	0	0	0	0	0	0
BGC0000134	0	0	0	0	0	0	0	0	0	0	0	1	0	0	0	0	0	0	0	0	0	0	0	0	0	0	0	0
BGC0000135	1	2	0	0	0	0	0	0	0	0	0	0	0	0	0	0	0	0	0	0	0	0	0	0	0	0	0	0
BGC0000136	1	0	0	0	0	0	0	0	0	0	0	1	0	0	0	0	0	0	0	0	0	0	0	0	0	0	0	0
BGC0000140	0	0	0	0	0	0	0	0	0	0	0	1	0	0	0	0	0	0	0	0	0	0	0	0	0	0	0	0
BGC0000141	1	0	0	0	0	0	0	0	0	0	0	0	0	0	0	0	0	0	0	0	0	0	0	0	0	0	0	0
BGC0000142	1	0	0	0	0	0	0	0	0	2	0	1	0	0	2	0	0	0	0	0	0	0	0	0	0	0	0	0
BGC0000144	1	2	0	0	0	0	0	0	0	0	0	1	0	0	0	0	0	0	0	0	0	0	1	0	0	0	0	0
BGC0000150	0	0	0	0	0	0	0	0	0	0	0	2	0	0	0	0	0	0	0	0	0	0	0	0	0	0	0	1
BGC0000151	1	0	0	0	0	0	1	0	0	0	0	0	0	0	0	0	0	0	0	0	0	0	0	0	0	0	0	0
BGC0000154	0	0	0	0	0	0	0	0	0	0	0	1	0	0	0	0	0	0	0	0	0	0	0	0	0	0	0	0
BGC0000158	0	0	0	0	0	0	0	0	0	0	0	1	0	0	0	0	0	0	0	0	0	0	0	0	0	0	0	0
BGC0000160	0	0	0	0	0	0	0	0	0	0	0	1	0	0	0	0	0	0	0	0	0	0	0	0	0	0	0	0
BGC0000161	0	0	0	0	0	0	0	0	0	0	0	2	0	0	0	0	0	0	0	0	0	0	0	0	0	0	0	0
BGC0000162	0	0	0	0	0	0	0	0	0	0	0	1	0	0	0	0	0	0	0	0	0	0	0	0	0	0	0	0
BGC0000163	1	4	0	0	0	0	0	0	0	0	0	2	0	0	0	0	0	0	0	0	0	0	1	0	0	0	0	0
BGC0000165	1	2	0	0	0	0	0	0	0	0	0	1	0	0	0	0	0	0	0	0	0	0	0	0	0	0	0	0
BGC0000168	0	0	0	0	0	0	0	0	0	0	0	1	0	0	0	0	0	0	0	0	0	0	0	0	0	0	0	0
BGC0000171	0	2	0	0	0	0	0	0	0	0	0	1	0	0	0	0	0	0	0	0	0	0	1	0	0	0	0	0
BGC0000178	0	0	0	0	0	0	0	0	0	0	0	1	0	0	0	0	0	0	0	0	0	0	0	0	0	0	0	0
BGC0000179	0	0	0	0	0	0	0	2	0	0	0	0	0	0	0	0	0	0	0	0	0	0	0	0	0	0	0	0
BGC0000180	0	0	0	0	0	0	0	0	0	0	0	1	0	0	0	0	0	0	0	0	0	0	0	0	0	0	0	0
BGC0000184	0	0	0	0	0	0	0	4	0	0	0	0	0	0	0	0	0	0	0	0	0	0	0	0	0	0	0	0
BGC0000187	0	0	0	0	0	0	0	0	0	0	0	3	0	0	0	0	0	0	0	0	0	0	0	0	0	0	0	0
BGC0000188	0	0	0	0	0	0	0	4	0	0	0	0	0	0	0	0	0	0	0	0	0	0	0	0	0	0	0	0
BGC0000190	0	0	0	0	0	0	0	0	0	0	0	2	0	0	0	0	0	0	0	0	0	0	0	0	0	0	0	0
BGC0000191	1	0	0	0	0	0	1	0	0	0	0	0	0	0	0	0	0	0	0	0	0	0	0	0	0	0	0	0
BGC0000194	0	0	0	0	0	0	0	0	0	0	0	2	0	0	0	0	2	0	0	0	0	0	0	0	0	0	0	0
BGC0000195	0	0	0	0	0	0	0	0	0	0	0	1	0	0	0	0	2	0	0	0	0	0	0	0	0	0	0	0
BGC0000197	0	0	0	0	0	0	0	0	0	0	0	1	0	0	0	0	0	0	0	0	0	0	0	0	0	0	0	0
BGC0000198	1	0	0	0	0	0	1	0	0	0	0	0	0	0	0	0	0	0	0	0	0	0	0	0	0	0	0	0
BGC0000199	1	0	0	0	0	0	1	0	0	0	0	0	0	0	0	0	0	0	0	0	0	0	0	0	0	0	0	0
BGC0000200	1	0	0	0	0	0	1	0	0	0	0	1	0	0	0	0	0	0	0	0	0	0	0	0	0	0	0	0
BGC0000201	0	0	0	0	0	0	0	0	0	0	0	1	0	0	0	0	0	0	0	0	0	0	0	0	0	0	0	0
BGC0000202	0	0	0	0	0	0	0	0	0	0	0	3	0	0	0	0	0	0	0	0	0	0	0	0	0	0	0	0
BGC0000203	0	0	0	0	0	0	0	0	0	0	0	3	0	0	0	0	0	0	0	0	0	0	0	0	0	0	0	0
BGC0000207	1	0	0	0	0	0	0	0	0	0	0	1	0	0	0	0	0	0	0	0	0	0	0	0	0	1	0	0
BGC0000208	0	0	0	0	0	0	0	0	0	0	0	1	0	0	0	0	0	0	0	0	0	0	0	0	0	0	0	0
BGC0000209	0	0	0	0	0	0	0	0	0	0	0	2	0	0	0	0	0	0	0	0	0	0	0	0	0	0	0	0
BGC0000210	1	0	0	0	0	0	1	0	0	0	0	0	0	0	0	0	0	0	0	0	0	0	0	0	0	0	0	0
BGC0000212	1	0	0	0	0	0	1	0	0	0	0	0	0	0	0	0	0	0	0	0	0	0	0	0	0	0	0	0
BGC0000213	0	0	0	0	0	0	0	0	0	0	0	1	0	0	0	0	0	0	0	0	0	0	0	0	0	0	0	0
BGC0000214	1	0	0	0	0	0	0	0	0	0	0	0	0	0	0	0	0	0	0	0	0	0	0	0	0	0	0	0
BGC0000216	0	0	0	0	0	0	0	0	0	0	0	1	0	0	0	0	0	0	0	0	0	0	0	0	0	0	0	0
BGC0000219	0	0	0	0	0	0	0	0	0	0	0	1	0	0	0	0	0	0	0	0	0	0	0	0	0	0	0	1
BGC0000220	0	0	0	0	0	0	0	0	0	0	0	1	0	0	0	0	0	0	0	0	0	0	0	0	0	0	0	0
BGC0000221	0	0	0	0	0	0	0	0	0	0	0	1	0	0	0	0	0	0	0	0	0	0	0	0	0	0	0	0
BGC0000222	0	0	0	0	0	0	0	0	0	0	0	1	0	0	0	0	0	0	0	0	0	0	0	0	0	0	0	0
BGC0000223	0	0	0	0	0	0	0	0	0	0	1	1	0	0	0	0	0	0	0	0	0	0	0	0	0	0	0	0
BGC0000224	0	0	0	0	0	0	0	0	0	0	0	3	0	0	0	0	0	0	0	0	0	0	0	0	0	0	0	0
BGC0000225	2	2	0	0	0	0	0	0	0	0	0	1	0	0	0	0	0	0	0	0	0	0	0	0	0	0	1	0
BGC0000226	0	0	0	0	0	0	0	0	0	0	0	1	0	0	0	0	0	0	0	0	0	0	0	0	0	0	0	0
BGC0000227	0	0	0	0	0	0	0	0	0	0	0	1	0	0	0	0	0	0	0	0	0	0	0	0	0	0	0	0
BGC0000229	0	0	0	0	0	0	0	0	0	0	0	2	0	0	0	0	0	0	0	0	0	0	0	0	0	0	0	0
BGC0000230	0	0	0	0	0	0	0	0	0	0	0	1	0	0	0	0	0	0	0	0	0	0	0	0	0	0	0	0
BGC0000232	0	0	0	0	0	0	0	0	0	0	0	1	0	0	0	0	0	0	0	0	0	0	0	0	0	0	0	0
BGC0000233	2	0	0	0	0	0	1	0	0	0	0	1	0	0	0	0	0	0	0	0	0	0	0	0	0	0	0	0
BGC0000235	1	0	0	0	0	0	0	0	0	0	0	1	0	0	0	0	0	0	0	0	0	0	0	0	0	0	0	0
BGC0000236	0	0	0	0	0	0	0	0	0	0	1	1	0	0	0	0	0	0	0	0	0	0	0	0	0	0	0	0
BGC0000237	0	0	0	0	0	0	0	0	0	0	0	1	0	0	0	0	0	0	0	0	0	0	0	0	0	0	0	0
BGC0000238	0	0	0	0	0	0	0	0	0	0	0	1	0	0	0	0	0	0	0	0	0	0	0	0	0	0	0	0
BGC0000239	0	0	0	0	0	0	0	0	0	0	0	1	0	0	0	0	0	0	0	0	0	0	0	0	0	0	0	0
BGC0000240	2	0	0	1	0	0	0	0	0	0	0	1	0	0	0	1	0	0	0	0	0	0	0	0	0	0	0	0
BGC0000241	2	0	0	1	0	0	0	0	0	0	0	1	0	0	0	1	0	0	0	0	0	0	0	0	0	0	0	0
BGC0000242	0	0	0	0	0	0	0	0	0	0	0	1	0	0	0	0	0	0	0	0	0	0	0	0	0	0	0	0
BGC0000243	1	0	0	0	0	0	0	0	0	0	0	0	0	0	0	0	0	0	0	0	0	0	0	0	0	0	0	0
BGC0000245	0	0	0	0	0	0	0	0	0	0	0	1	0	0	0	0	0	0	0	0	0	0	0	0	0	0	0	0
BGC0000247	1	0	0	0	0	0	1	0	0	0	0	1	0	0	0	0	0	0	0	0	0	0	0	0	0	0	0	0
BGC0000253	0	0	0	0	0	0	0	0	0	0	0	1	0	0	0	0	0	0	0	0	0	0	0	0	0	0	0	0
BGC0000256	1	0	0	0	0	0	1	0	0	0	0	0	0	0	0	0	0	0	0	0	0	0	0	0	0	0	0	0
BGC0000257	1	0	0	0	0	0	0	0	0	2	0	0	0	0	2	0	0	0	0	0	0	0	0	0	0	0	0	0
BGC0000262	0	0	0	0	0	0	0	0	0	0	0	3	0	0	0	0	0	0	0	0	0	0	0	0	0	0	0	0
BGC0000264	0	0	0	0	0	0	0	0	0	0	0	1	0	0	0	0	0	0	0	0	0	0	0	0	0	0	0	0
BGC0000266	0	0	0	0	0	0	0	0	0	0	0	1	0	0	0	0	0	0	0	0	0	0	0	0	0	0	0	0
BGC0000267	0	0	0	0	0	0	0	0	0	0	0	2	0	0	0	0	0	0	0	0	0	0	0	0	0	0	0	0
BGC0000268	0	2	0	0	0	0	0	0	0	0	0	3	0	0	0	0	0	0	0	0	0	0	0	0	0	0	0	0
BGC0000269	0	0	0	0	0	0	0	0	0	0	0	1	0	0	0	0	0	0	0	0	0	0	0	0	0	0	0	0
BGC0000270	0	0	0	0	0	0	0	0	0	0	0	1	0	0	0	0	0	0	0	0	0	0	0	0	0	0	0	0
BGC0000273	0	0	0	0	0	0	0	0	0	0	0	1	0	0	0	0	2	0	0	0	0	0	0	0	0	0	0	0
BGC0000274	1	0	0	0	0	0	0	0	0	0	0	0	0	0	0	0	0	0	0	0	0	0	0	0	0	0	0	0
BGC0000275	0	0	0	0	0	0	0	0	0	0	0	1	0	0	0	0	0	0	0	0	0	0	0	0	0	0	0	0
BGC0000277	0	0	0	0	0	0	0	0	0	0	0	1	0	0	0	0	0	0	0	0	0	0	0	0	0	0	0	0
BGC0000279	0	0	0	0	0	0	0	0	0	0	0	1	0	0	0	0	2	0	0	0	0	0	0	0	0	0	0	0
BGC0000280	0	0	0	0	0	0	0	0	0	0	0	1	0	0	0	0	0	0	0	0	0	0	0	0	0	0	0	0
BGC0000281	0	0	0	0	0	0	0	0	0	0	0	1	0	0	0	0	0	0	0	0	0	0	0	0	0	0	0	0
BGC0000283	0	0	0	0	0	0	0	0	0	0	0	2	0	0	0	0	0	0	0	0	0	0	0	0	0	0	0	0
BGC0000285	0	0	0	0	0	0	0	0	0	0	0	1	0	0	0	0	0	0	0	0	0	0	0	0	0	0	0	0
BGC0000287	1	1	0	0	0	0	0	0	0	0	0	0	0	0	0	0	0	0	0	0	0	0	0	0	0	0	0	0
BGC0000288	2	0	0	2	0	0	0	0	0	0	0	0	0	0	0	0	0	0	0	0	0	0	0	0	0	0	0	0
BGC0000289	3	2	0	1	0	0	0	0	0	2	0	0	0	0	0	0	0	0	0	0	0	0	0	0	0	0	0	0
BGC0000290	1	0	0	1	0	0	0	0	0	0	0	0	0	0	0	0	0	0	0	0	0	0	0	0	0	0	0	0
BGC0000291	2	0	0	0	0	0	1	0	0	2	0	0	0	0	1	0	0	0	0	0	0	0	0	0	0	0	0	0
BGC0000292	0	0	0	0	0	0	0	0	0	0	0	1	0	0	0	0	0	0	0	0	0	0	0	0	0	0	0	0
BGC0000294	3	0	1	2	0	2	0	0	0	0	0	0	0	0	0	0	0	0	0	0	0	1	0	0	0	0	0	0
BGC0000295	0	0	1	0	0	0	0	0	0	0	0	2	0	0	0	0	0	0	0	0	0	0	0	0	0	0	0	0
BGC0000296	3	0	0	0	0	0	2	0	0	0	0	0	0	0	0	0	0	0	0	0	0	0	0	0	0	0	0	0
BGC0000297	0	0	0	1	0	0	0	0	0	0	0	0	0	0	0	0	0	0	0	0	0	0	0	0	0	0	0	0
BGC0000298	1	0	0	1	0	0	0	0	0	0	0	0	0	0	0	0	0	0	0	0	0	0	0	0	0	0	0	0
BGC0000299	2	0	0	0	0	0	0	0	0	0	0	0	0	2	0	0	0	0	0	0	0	0	0	0	0	0	0	0
BGC0000300	0	0	0	0	0	2	0	0	0	0	1	0	0	0	0	0	0	0	0	0	0	1	0	0	0	0	0	0
BGC0000301	1	0	0	1	0	0	0	0	0	0	0	0	0	0	0	0	0	0	0	0	0	0	0	0	0	0	0	0
BGC0000302	1	0	0	1	0	0	0	0	0	0	0	0	0	0	0	0	0	0	0	0	0	0	0	0	0	0	0	0
BGC0000303	1	0	0	0	0	0	0	0	0	0	0	1	0	0	0	0	0	0	0	0	0	0	0	0	0	0	0	0
BGC0000304	0	0	0	0	0	0	0	0	0	0	0	1	0	0	0	0	0	0	0	0	0	0	0	0	0	0	0	0
BGC0000306	1	0	0	0	0	0	0	0	0	0	0	0	0	0	0	0	0	0	0	0	0	0	0	0	0	0	0	0
BGC0000310	1	0	0	0	0	0	0	0	0	0	0	0	0	0	0	1	0	0	0	0	0	0	0	0	0	0	0	0
BGC0000311	1	0	0	1	0	0	0	0	0	0	0	0	0	0	0	0	0	0	0	0	0	0	0	0	0	0	0	0
BGC0000314	1	0	0	0	0	0	0	0	0	0	0	0	0	2	0	0	0	0	0	0	0	0	0	0	0	0	0	0
BGC0000315	2	0	0	1	0	0	0	0	0	0	0	0	0	0	0	0	0	0	0	0	0	0	0	0	0	0	0	0
BGC0000316	0	0	0	0	0	0	0	0	0	0	1	0	0	0	0	0	0	0	0	0	0	0	0	0	0	0	0	0
BGC0000317	0	0	0	0	0	0	0	0	0	0	0	2	0	0	0	0	0	0	0	0	0	0	0	0	0	0	0	0
BGC0000319	0	0	0	0	0	0	0	0	0	0	0	1	0	0	0	0	0	0	0	0	0	0	0	0	0	0	0	0
BGC0000320	1	0	0	0	0	0	0	0	0	0	0	0	1	0	0	0	0	0	0	0	0	0	0	0	0	0	0	0
BGC0000321	2	0	0	2	0	0	0	0	0	0	0	0	0	0	0	0	0	0	0	0	0	0	0	0	0	0	0	0
BGC0000323	1	0	0	0	0	0	0	0	0	1	0	0	0	0	1	0	0	0	0	0	0	0	0	0	0	0	0	0
BGC0000324	2	0	0	2	0	0	0	0	0	0	0	0	0	0	0	0	0	0	0	0	0	0	0	0	0	0	0	0
BGC0000325	3	0	0	2	0	2	0	0	0	0	0	0	0	0	0	0	0	0	0	0	0	1	0	0	0	0	0	0
BGC0000326	1	0	0	1	0	0	0	0	0	0	0	0	0	0	0	0	0	0	0	0	0	0	0	0	0	0	0	0
BGC0000327	2	0	0	2	0	0	0	0	0	0	0	0	0	0	0	0	0	0	0	0	0	0	0	0	0	0	0	0
BGC0000329	1	0	0	0	1	0	0	0	2	1	0	0	0	0	1	0	0	0	0	0	0	0	0	0	0	0	0	0
BGC0000330	1	0	1	1	0	0	0	0	0	0	0	0	0	0	0	0	0	0	0	0	0	0	0	0	0	0	0	0
BGC0000331	1	0	0	1	0	0	0	0	0	0	0	0	0	0	0	0	0	0	0	0	0	0	0	0	0	0	0	0
BGC0000332	1	0	0	1	0	0	0	0	0	0	0	0	0	0	0	0	0	0	0	0	0	0	0	0	0	0	0	0
BGC0000333	1	0	0	0	0	0	1	0	0	0	0	0	0	0	0	0	0	0	0	0	0	0	0	0	0	0	0	0
BGC0000336	6	2	0	3	0	1	1	0	0	0	0	1	0	0	0	0	0	0	0	0	0	1	0	0	0	0	0	1
BGC0000337	2	0	0	2	0	0	0	0	0	0	0	1	0	0	0	0	0	0	0	0	0	0	0	0	0	0	0	0
BGC0000339	1	0	0	0	0	0	0	0	0	0	0	0	0	0	0	0	0	0	0	0	0	0	0	0	0	0	0	0
BGC0000340	1	1	0	0	0	0	0	0	0	0	0	0	0	0	0	0	0	0	0	0	1	0	0	0	0	0	0	0
BGC0000341	2	2	0	1	0	0	0	0	0	0	0	0	1	0	0	0	0	0	0	0	0	0	1	0	0	0	0	0
BGC0000343	0	0	0	0	0	0	0	0	0	0	0	1	0	0	0	0	0	0	0	0	0	0	0	0	0	0	0	0
BGC0000344	2	2	0	0	0	0	0	0	0	1	0	0	0	0	1	0	0	0	0	0	0	0	0	0	0	0	0	1
BGC0000347	4	0	0	2	0	0	0	0	0	0	0	0	0	0	0	0	0	0	0	0	0	0	0	0	0	0	0	0
BGC0000349	2	0	0	2	0	0	0	0	0	0	0	0	0	0	0	0	0	0	0	0	0	1	0	0	0	0	0	0
BGC0000351	1	0	0	2	0	0	0	0	0	0	0	0	0	0	0	0	0	0	0	0	0	0	0	0	0	0	0	0
BGC0000352	0	0	1	0	0	0	0	2	0	0	0	1	0	0	0	0	0	0	0	0	0	0	0	0	0	0	0	0
BGC0000354	1	0	0	0	0	0	1	0	0	0	0	2	0	0	0	0	2	0	0	0	0	0	0	0	0	0	0	0
BGC0000355	0	0	0	0	0	0	0	0	0	0	0	1	0	0	0	0	0	0	0	0	0	0	0	0	0	0	0	0
BGC0000360	2	0	0	2	0	0	0	0	0	0	0	0	0	0	0	0	0	0	0	0	0	0	0	0	0	0	0	0
BGC0000361	0	0	0	0	0	0	0	0	0	0	0	1	0	0	0	0	0	0	0	0	0	0	0	0	0	0	0	0
BGC0000362	1	0	0	0	0	0	2	0	0	0	0	0	0	0	0	0	4	0	0	0	0	0	0	0	0	0	0	0
BGC0000363	0	0	0	0	0	0	0	0	0	0	0	0	0	0	0	0	4	0	0	0	0	0	0	0	0	0	0	0
BGC0000364	0	0	0	0	0	0	0	0	0	0	0	0	0	0	0	0	4	0	0	0	0	0	0	0	0	0	0	0
BGC0000365	0	0	0	0	0	0	0	0	0	0	0	0	0	0	0	0	6	0	0	0	0	0	0	0	0	0	0	0
BGC0000366	1	0	0	0	0	2	0	0	0	0	0	0	0	0	0	0	0	0	0	0	0	1	0	0	0	0	0	0
BGC0000367	1	0	0	0	1	0	1	0	0	0	0	0	0	0	0	0	0	0	0	0	0	0	0	0	0	0	0	0
BGC0000368	1	0	0	0	0	2	0	0	0	0	0	1	0	0	0	0	0	0	0	0	0	1	0	0	0	0	0	0
BGC0000369	1	0	0	1	0	0	0	0	0	0	0	2	0	0	0	0	0	0	0	0	0	0	0	0	0	0	0	0
BGC0000371	0	0	0	0	0	0	0	0	0	0	1	2	0	0	0	0	0	0	0	0	0	1	0	0	0	0	0	0
BGC0000372	0	0	0	0	0	0	0	0	0	0	0	1	0	0	0	0	0	0	0	0	0	0	0	0	0	0	0	0
BGC0000373	0	0	0	0	0	0	0	0	0	0	0	1	0	0	0	0	0	0	0	0	0	0	0	0	0	0	0	0
BGC0000374	1	0	0	0	0	0	0	0	0	0	0	0	0	0	0	0	0	0	0	0	0	0	0	0	0	0	0	0
BGC0000375	0	0	0	0	0	0	0	0	0	0	0	1	0	0	0	0	0	0	0	0	0	0	0	0	0	0	0	0
BGC0000376	0	0	0	0	0	0	0	0	0	0	0	1	0	0	0	0	0	0	0	0	0	0	0	0	0	0	0	0
BGC0000378	0	0	0	0	0	0	0	0	0	0	0	2	0	0	0	0	0	0	0	0	0	0	0	0	0	0	0	0
BGC0000379	2	0	0	0	0	0	1	0	0	0	0	0	0	0	0	0	2	0	0	0	0	0	0	0	0	0	0	0
BGC0000381	1	2	0	0	0	0	0	0	0	0	0	0	0	0	0	0	0	0	0	0	0	0	0	0	0	0	0	1
BGC0000383	0	0	0	0	0	0	0	0	0	0	0	1	0	0	0	0	0	0	0	0	0	0	0	0	0	0	0	0
BGC0000385	2	0	2	2	6	0	0	0	0	0	0	1	0	0	0	0	2	0	0	0	0	0	0	0	0	0	0	0
BGC0000387	0	0	1	0	0	0	0	0	0	0	0	0	0	0	0	0	0	0	0	0	0	0	0	0	0	0	0	0
BGC0000388	1	2	0	0	0	0	0	0	0	0	0	1	0	0	0	0	0	0	0	0	0	0	1	0	0	0	0	0
BGC0000392	1	0	0	0	0	2	0	0	0	0	0	1	0	0	0	0	0	0	0	0	0	1	0	0	0	0	0	0
BGC0000394	1	0	0	0	0	0	0	0	0	0	0	1	0	0	0	0	0	0	0	0	0	0	0	0	0	0	0	0
BGC0000395	0	0	0	0	0	0	0	0	0	0	0	1	0	0	0	0	0	0	0	0	0	0	0	0	0	0	0	0
BGC0000397	1	0	0	1	0	0	0	0	0	0	0	0	0	0	0	0	0	0	0	0	0	0	0	0	0	0	0	0
BGC0000398	1	0	0	0	0	0	0	0	0	1	0	0	0	0	1	0	0	0	0	0	0	0	0	0	0	0	0	0
BGC0000399	1	0	0	0	0	0	0	0	2	1	0	0	0	0	1	0	0	0	0	0	0	0	0	0	0	0	0	0
BGC0000400	2	0	0	2	0	0	0	0	0	0	0	0	0	0	0	0	0	0	0	0	0	0	0	0	0	0	0	0
BGC0000403	2	0	0	2	0	0	0	0	0	0	0	0	0	0	0	0	0	0	0	0	0	0	0	0	0	0	0	0
BGC0000406	0	0	0	0	0	0	0	0	0	0	0	2	0	0	0	0	0	0	0	0	0	0	0	0	0	0	0	0
BGC0000407	0	0	0	0	0	0	0	2	0	0	0	0	0	0	0	0	0	0	0	0	0	0	0	0	0	0	0	0
BGC0000408	2	0	0	2	0	0	0	0	0	0	0	0	0	0	0	0	0	0	0	0	0	0	0	0	0	0	0	0
BGC0000409	1	0	0	0	0	0	0	0	0	0	0	1	0	0	0	0	0	0	0	0	0	0	0	0	0	0	0	0
BGC0000410	3	0	0	2	0	2	0	0	0	0	0	0	0	0	0	0	0	0	0	0	0	1	0	0	0	0	0	0
BGC0000411	1	0	0	0	0	0	0	0	2	1	0	0	0	0	1	0	0	0	0	0	0	0	0	0	0	0	0	0
BGC0000412	2	0	0	1	0	0	0	0	0	0	0	0	0	0	0	0	0	0	0	0	0	0	0	0	0	0	0	0
BGC0000413	4	1	1	2	0	1	0	0	4	1	0	3	0	0	1	0	0	0	0	0	0	0	0	0	0	0	0	0
BGC0000414	0	0	0	0	0	0	0	0	0	0	1	0	0	0	0	0	0	0	0	0	0	0	0	0	0	0	0	0
BGC0000415	1	0	0	0	0	0	1	0	0	0	0	0	0	0	0	0	0	0	0	0	0	0	0	0	0	0	0	0
BGC0000417	0	0	0	0	0	0	0	0	0	0	1	0	0	2	0	0	0	0	0	0	0	1	0	0	0	0	0	0
BGC0000418	1	0	0	1	0	0	0	0	0	0	0	0	0	0	0	0	0	0	0	0	0	0	0	0	0	0	0	0
BGC0000419	1	0	0	1	0	0	0	0	0	0	0	0	0	0	0	0	0	0	0	0	0	0	0	0	0	0	0	0
BGC0000420	0	0	0	0	0	0	0	0	0	0	0	1	0	0	0	0	0	0	0	0	0	0	0	0	0	0	0	0
BGC0000422	0	0	0	0	0	0	0	0	0	0	0	1	0	0	0	0	0	0	0	0	0	0	0	0	0	0	0	0
BGC0000423	3	0	0	2	0	2	0	0	0	0	0	0	0	0	0	0	0	0	0	0	0	1	0	0	0	0	0	0
BGC0000424	1	0	2	0	0	0	0	0	0	0	0	0	0	0	0	0	0	0	0	0	0	0	0	0	0	0	0	0
BGC0000425	2	0	0	1	0	0	0	0	2	1	0	0	0	0	1	0	0	0	0	0	0	0	0	0	0	0	0	0
BGC0000428	1	0	0	0	0	0	0	0	0	0	0	0	0	0	0	0	0	0	0	0	0	0	0	0	0	0	0	0
BGC0000429	1	0	0	0	0	0	2	0	0	0	0	0	0	0	0	0	0	0	2	0	0	0	0	0	0	0	0	0
BGC0000430	1	0	0	1	0	0	0	0	0	0	0	0	0	0	0	0	0	0	0	0	0	0	0	0	0	0	0	0
BGC0000431	0	0	0	0	0	0	0	0	0	0	0	1	0	0	0	0	0	0	0	0	0	0	0	0	0	0	0	0
BGC0000432	2	0	0	2	0	0	0	0	0	0	0	0	0	0	0	0	0	0	0	0	0	0	0	0	0	0	0	0
BGC0000433	1	1	0	0	0	0	0	0	0	0	0	0	0	0	0	0	0	0	0	0	0	0	0	0	0	0	0	0
BGC0000434	2	0	0	0	0	0	1	0	0	0	0	0	0	0	0	0	0	0	0	0	0	0	0	0	0	0	0	0
BGC0000435	1	0	0	0	0	0	0	0	0	1	0	0	0	0	1	0	0	0	0	0	0	0	0	0	0	0	0	0
BGC0000436	0	0	0	0	0	0	0	0	0	0	0	1	0	0	0	0	0	0	0	0	0	0	0	0	0	0	0	0
BGC0000437	2	0	0	1	1	0	0	0	4	1	0	0	0	0	1	0	0	0	0	0	0	0	0	0	0	0	0	0
BGC0000439	1	0	0	0	0	0	1	0	0	0	0	0	0	0	0	0	0	0	0	0	0	0	0	0	0	0	0	0
BGC0000440	1	0	0	1	0	0	0	0	0	0	0	0	0	0	0	0	0	0	0	0	0	0	0	0	0	0	0	0
BGC0000441	1	0	0	1	0	0	0	0	0	0	0	0	0	0	0	0	0	0	0	0	0	0	0	0	0	0	0	0
BGC0000443	0	0	0	0	0	0	0	0	0	0	1	0	0	0	0	0	0	0	0	0	0	0	0	0	0	0	0	0
BGC0000445	2	0	0	0	0	0	1	0	0	0	0	3	0	0	0	0	0	0	0	0	0	0	0	0	0	0	0	0
BGC0000446	1	0	0	0	0	0	0	2	0	0	0	1	0	0	0	0	0	0	0	0	0	0	0	0	0	0	0	0
BGC0000447	2	0	0	1	0	0	0	0	2	1	0	0	0	0	1	0	0	0	0	0	0	0	0	0	0	0	0	0
BGC0000448	1	0	0	0	0	0	0	0	0	0	0	0	0	0	0	0	0	0	0	0	0	0	0	0	0	0	0	0
BGC0000449	2	0	0	2	0	0	0	0	0	0	0	0	0	0	0	0	0	0	0	0	0	0	0	0	0	0	0	0
BGC0000450	2	0	0	0	0	0	1	0	0	0	0	0	0	0	0	0	0	0	0	0	0	0	0	0	0	0	0	0
BGC0000451	0	0	1	0	1	0	0	0	0	0	1	0	0	0	0	0	0	0	0	0	0	0	0	0	0	0	0	0
BGC0000452	4	0	0	2	0	0	0	0	0	0	0	1	0	0	0	0	0	0	0	0	0	0	0	0	0	0	0	0
BGC0000454	0	0	1	0	0	0	0	0	0	0	1	0	0	0	0	0	0	0	0	0	0	0	0	0	0	0	0	0
BGC0000455	1	0	0	1	0	0	0	0	0	0	0	0	0	0	0	0	0	0	0	0	0	0	0	0	0	0	0	0
BGC0000457	0	0	0	0	0	0	0	2	0	0	0	0	0	0	0	0	0	0	0	0	0	0	0	0	0	0	0	0
BGC0000458	0	0	0	0	0	0	0	0	0	0	1	0	0	0	0	0	0	0	0	0	0	0	0	0	0	0	0	0
BGC0000459	2	0	0	0	0	0	0	0	0	0	0	2	0	0	0	0	0	0	0	0	0	0	0	0	0	0	0	0
BGC0000460	0	0	1	0	0	0	0	0	0	0	0	0	0	0	0	0	0	0	0	0	0	1	0	0	0	0	0	0
BGC0000461	1	0	1	1	0	0	0	0	0	0	0	0	0	0	0	0	0	0	0	0	0	0	0	0	0	0	0	0
BGC0000463	1	0	0	0	0	0	0	0	0	1	0	0	0	0	1	0	0	0	0	0	0	0	0	0	0	0	0	0
BGC0000464	1	0	0	1	0	0	0	0	0	0	0	0	0	0	0	0	0	0	0	0	0	0	0	0	0	0	0	0
BGC0000466	0	0	0	0	0	0	0	0	0	0	0	1	0	0	0	0	0	0	0	0	0	0	0	0	0	0	0	0
BGC0000468	0	0	0	0	0	0	0	0	0	0	1	0	0	0	0	0	0	0	0	0	0	0	0	0	0	0	0	0
BGC0000469	1	0	0	0	0	0	0	0	0	0	0	1	0	0	0	0	0	0	0	0	0	0	0	0	0	1	0	0
BGC0000470	0	0	0	0	0	0	0	0	0	0	0	1	0	0	0	0	0	0	0	0	0	0	0	0	0	0	0	0
BGC0000484	1	0	0	1	0	0	0	0	0	0	0	0	0	0	0	0	0	0	0	0	0	0	0	0	0	0	0	0
BGC0000486	1	0	0	0	0	0	0	0	0	0	0	0	0	0	0	0	0	0	0	0	0	0	0	0	0	0	0	0
BGC0000487	2	0	0	0	0	0	0	0	0	1	0	0	0	0	1	0	0	0	0	0	0	0	0	0	0	0	0	0
BGC0000488	2	0	0	0	0	0	0	0	0	1	0	0	0	0	1	0	0	0	0	0	0	0	0	0	0	0	0	0
BGC0000489	1	0	0	0	0	0	0	0	0	0	0	0	0	0	0	0	0	0	0	0	0	0	0	0	0	0	0	0
BGC0000490	1	0	0	0	0	0	0	0	0	0	0	0	0	0	0	0	0	0	0	0	0	0	0	0	0	0	0	0
BGC0000491	1	0	0	0	0	0	0	0	0	0	0	0	0	0	0	0	0	0	0	0	0	0	0	0	0	0	0	0
BGC0000494	1	0	0	0	0	0	0	0	0	0	0	0	0	0	0	0	0	0	0	0	0	0	0	0	0	0	0	0
BGC0000495	2	2	0	0	0	0	0	0	0	2	0	0	0	0	0	0	0	1	0	0	0	0	1	0	0	1	0	0
BGC0000496	2	0	0	1	0	0	0	0	0	0	0	0	0	0	0	0	0	0	0	0	0	0	0	0	0	0	0	0
BGC0000497	2	0	0	1	0	0	0	0	0	0	0	0	0	0	0	0	0	0	0	0	0	0	0	0	0	0	0	0
BGC0000498	2	0	0	1	0	0	0	0	0	0	0	0	0	0	0	1	0	0	0	0	0	0	0	0	0	0	0	0
BGC0000499	0	0	0	0	0	0	0	0	0	0	0	0	0	0	0	2	0	0	0	0	0	0	0	0	0	0	0	0
BGC0000500	1	0	0	1	0	0	0	0	0	0	0	0	0	0	0	0	0	0	0	0	0	0	0	0	0	0	0	0
BGC0000501	2	0	0	1	0	0	0	0	0	0	0	0	0	0	0	0	0	0	0	0	0	0	0	0	0	0	0	0
BGC0000502	2	0	0	1	0	0	0	0	0	0	0	0	0	2	0	0	0	0	0	0	0	0	0	0	0	0	0	0
BGC0000503	1	0	0	0	0	0	1	0	0	0	0	0	0	0	0	0	0	0	0	0	0	0	0	0	0	0	0	0
BGC0000504	1	0	0	1	0	0	0	0	0	0	0	0	0	0	0	0	0	0	0	0	0	0	0	0	0	0	0	0
BGC0000506	2	0	0	0	0	0	0	0	0	0	0	0	0	0	0	1	0	0	0	0	0	0	0	0	0	0	0	0
BGC0000508	1	0	0	2	0	0	0	0	0	0	0	0	0	0	0	0	0	0	0	0	0	0	0	0	0	0	0	0
BGC0000509	1	0	0	1	0	0	0	0	0	0	0	0	0	0	0	1	0	0	0	0	0	0	0	0	0	0	0	0
BGC0000511	2	0	0	0	0	0	0	0	0	0	0	0	0	0	0	1	0	0	0	0	0	0	0	0	0	0	0	0
BGC0000513	2	0	0	1	0	0	0	0	0	0	0	0	0	0	0	0	0	0	0	0	0	0	0	0	0	0	0	0
BGC0000514	2	0	0	1	0	0	0	0	0	0	0	0	0	0	0	1	0	0	0	0	0	0	0	0	0	0	0	0
BGC0000515	2	0	0	0	0	0	0	0	0	0	0	0	0	0	0	2	0	0	0	0	0	0	0	0	0	0	0	0
BGC0000516	1	0	0	1	0	0	0	0	0	0	0	0	0	0	0	0	0	0	0	0	0	0	0	0	0	0	0	0
BGC0000517	1	0	0	1	0	0	0	0	0	0	0	0	0	0	0	0	0	0	0	0	0	0	0	0	0	0	0	0
BGC0000518	1	0	0	0	0	0	0	0	0	0	0	0	0	0	0	0	0	0	0	0	0	0	0	0	0	0	0	0
BGC0000519	2	0	0	1	0	0	0	0	0	0	0	0	0	0	0	0	0	0	0	0	0	0	0	0	0	0	0	0
BGC0000521	2	0	0	1	0	0	0	0	0	0	0	0	0	0	0	2	0	0	0	0	0	0	0	0	0	0	0	0
BGC0000522	1	0	0	0	0	0	0	0	0	0	0	0	0	0	0	0	0	0	0	0	0	0	0	0	0	0	0	0
BGC0000523	2	0	0	1	0	0	0	0	0	0	0	0	0	2	0	0	0	0	0	0	0	0	0	0	0	0	0	0
BGC0000526	2	0	0	1	0	0	0	0	0	0	0	0	0	0	0	2	0	0	0	0	0	0	0	0	0	0	0	0
BGC0000527	2	0	0	1	0	0	0	0	0	0	0	0	0	0	0	2	0	0	0	0	0	0	0	0	0	0	0	0
BGC0000528	1	0	0	0	0	0	0	0	0	0	0	0	0	0	0	2	0	0	0	0	0	0	0	0	0	0	0	0
BGC0000529	3	0	0	0	0	0	1	0	0	0	0	0	0	0	0	0	0	0	0	0	0	0	0	0	0	0	0	0
BGC0000530	1	0	0	1	0	0	0	0	0	0	0	0	0	0	0	0	0	0	0	0	0	0	0	0	0	0	0	0
BGC0000531	0	0	0	1	0	0	0	0	0	0	0	0	0	0	0	0	0	0	0	0	0	0	0	0	0	0	0	0
BGC0000533	1	0	0	1	0	0	0	0	0	0	0	0	0	0	0	0	0	0	0	0	0	0	0	0	0	0	0	0
BGC0000534	1	0	0	1	0	0	0	0	0	0	0	0	0	0	0	0	0	0	0	0	0	0	0	0	0	0	0	0
BGC0000535	2	0	0	0	0	0	0	0	0	0	0	0	0	0	0	0	0	0	0	0	0	0	0	0	0	0	0	0
BGC0000536	2	0	0	0	0	0	0	0	0	0	0	0	0	0	0	0	0	0	0	0	0	0	0	0	0	0	0	0
BGC0000537	2	0	0	0	0	0	0	0	0	0	0	0	0	0	0	0	0	0	0	0	0	0	0	0	0	0	0	0
BGC0000538	1	0	0	0	0	0	0	0	0	0	0	0	0	0	0	0	0	0	0	0	0	0	0	0	0	0	0	0
BGC0000539	2	0	0	1	0	0	0	0	0	0	0	0	0	0	0	2	0	0	0	0	0	0	0	0	0	0	0	0
BGC0000540	1	0	0	1	0	0	0	0	0	0	0	0	0	0	0	0	0	0	0	0	0	0	0	0	0	0	0	0
BGC0000541	2	0	0	0	0	0	0	0	0	0	0	0	0	0	0	1	0	0	0	0	0	0	0	0	0	0	0	0
BGC0000542	2	0	0	0	0	0	0	0	0	0	0	0	0	0	0	1	0	0	0	0	0	0	0	0	0	0	0	0
BGC0000543	1	0	0	1	0	0	0	0	0	0	0	0	0	0	0	0	0	0	0	0	0	0	0	0	0	0	0	0
BGC0000544	3	0	0	0	0	0	1	0	0	0	0	0	0	0	0	1	0	0	0	0	0	0	0	0	0	0	0	0
BGC0000545	2	0	0	1	0	0	0	0	0	0	0	0	0	0	0	2	0	0	0	0	0	0	0	0	0	0	0	0
BGC0000546	3	0	0	2	0	0	0	0	0	0	0	0	0	0	0	0	0	0	0	0	0	0	0	0	0	0	0	0
BGC0000547	2	0	0	1	0	0	0	0	0	0	0	0	0	0	0	2	0	0	0	0	0	0	0	0	0	0	0	0
BGC0000548	2	0	0	1	0	0	0	0	0	0	0	0	0	0	0	0	0	0	0	0	0	0	0	0	0	0	0	0
BGC0000549	2	0	0	0	0	0	0	0	0	0	0	0	0	0	0	0	0	0	0	0	0	0	0	0	0	0	0	0
BGC0000551	2	0	0	1	0	0	0	0	0	0	0	0	0	0	0	0	0	0	0	0	0	0	0	0	0	0	0	0
BGC0000552	2	0	0	1	0	0	0	0	0	0	0	0	0	0	0	0	0	0	0	0	0	0	0	0	0	0	0	0
BGC0000553	1	0	0	1	0	0	0	0	0	0	0	0	0	0	0	0	0	0	0	0	0	0	0	0	0	0	0	0
BGC0000554	1	0	0	1	0	0	0	0	0	0	0	0	0	0	0	0	0	0	0	0	0	0	0	0	0	0	0	0
BGC0000555	2	0	0	1	0	0	0	0	0	0	0	0	0	0	0	0	0	0	0	0	0	0	0	0	0	0	0	0
BGC0000556	2	0	0	0	0	0	0	0	0	0	0	0	0	0	0	0	0	0	0	0	0	0	0	0	0	0	0	0
BGC0000557	2	0	0	1	0	0	0	0	0	0	0	0	0	0	0	1	0	0	0	0	0	0	0	0	0	0	0	0
BGC0000558	1	0	0	1	0	0	0	0	0	0	0	0	0	0	0	0	0	0	0	0	0	0	0	0	0	0	0	0
BGC0000559	2	0	0	0	0	0	0	0	0	0	0	0	0	0	0	1	0	0	0	0	0	0	0	0	0	0	0	0
BGC0000560	1	0	0	1	0	0	0	0	0	0	0	0	0	0	0	0	0	0	0	0	0	0	0	0	0	0	0	0
BGC0000561	2	0	0	1	0	0	0	0	0	0	0	0	0	0	0	1	0	0	0	0	0	0	0	0	0	0	0	0
BGC0000563	1	0	0	0	0	0	1	0	0	0	0	0	0	0	0	0	0	0	0	0	0	0	0	0	0	0	0	0
BGC0000564	1	0	0	0	0	0	0	0	0	0	0	0	0	4	0	0	0	0	0	0	0	0	0	0	0	0	0	0
BGC0000565	2	0	0	0	0	0	0	0	0	0	0	0	0	0	0	0	0	0	0	0	0	0	0	0	0	0	0	0
BGC0000566	1	0	0	0	0	0	0	0	0	0	0	0	0	4	0	0	0	0	0	0	0	0	0	0	0	0	0	0
BGC0000568	1	0	0	0	0	0	0	0	0	0	0	0	0	0	0	0	0	0	0	0	0	0	0	0	0	0	0	0
BGC0000569	1	0	0	0	0	0	1	0	0	0	0	0	0	0	0	0	0	0	0	0	0	0	0	0	0	0	0	0
BGC0000571	1	0	0	1	0	0	0	0	0	0	0	0	0	0	0	0	0	0	0	0	0	0	0	0	0	0	0	0
BGC0000572	1	0	0	0	0	0	0	0	0	0	0	0	0	0	0	0	0	0	0	0	0	0	0	0	0	0	0	0
BGC0000573	0	0	1	0	0	0	0	0	0	0	0	0	0	0	0	0	0	0	0	0	0	0	0	0	0	0	0	0
BGC0000575	1	0	0	1	0	0	0	0	0	0	0	0	0	0	0	0	0	0	0	0	0	0	0	0	0	0	0	0
BGC0000576	0	0	1	0	0	0	0	0	0	0	0	0	0	0	0	0	0	0	0	0	0	0	0	0	0	0	0	0
BGC0000577	0	0	1	0	0	0	0	0	0	0	0	0	0	0	0	0	0	0	0	0	0	0	0	0	0	0	0	0
BGC0000578	1	0	0	1	0	0	0	0	0	0	0	0	0	0	0	0	0	0	0	0	0	0	0	0	0	0	0	0
BGC0000579	1	0	0	0	0	0	1	0	0	0	0	0	0	0	0	0	0	0	0	0	0	0	0	0	0	0	0	0
BGC0000581	1	0	0	1	0	0	0	0	0	0	0	0	0	0	0	0	0	0	0	0	0	0	0	0	0	0	0	0
BGC0000582	1	0	0	0	0	0	0	0	0	0	0	0	0	0	0	0	0	0	0	0	0	0	0	0	0	0	0	0
BGC0000583	2	0	0	0	0	0	0	0	0	0	0	0	0	0	0	0	0	0	0	0	0	0	0	0	0	0	0	0
BGC0000584	1	0	0	1	0	0	0	0	0	0	0	0	0	0	0	0	0	0	0	0	0	0	0	0	0	0	0	0
BGC0000585	0	0	0	0	0	0	0	0	0	0	0	1	0	0	0	0	0	0	0	0	0	0	0	0	0	0	0	0
BGC0000586	1	0	0	1	0	0	0	0	0	0	0	0	0	0	0	0	0	0	0	0	0	0	0	0	0	0	0	0
BGC0000587	1	0	0	1	0	0	0	0	0	0	0	0	0	0	0	0	0	0	0	0	0	0	0	0	0	0	0	0
BGC0000588	1	0	0	1	0	0	0	0	0	0	0	0	0	0	0	0	0	0	0	0	0	0	0	0	0	0	0	0
BGC0000589	1	0	0	1	0	0	0	0	0	0	0	0	0	0	0	0	0	0	0	0	0	0	0	0	0	0	0	0
BGC0000590	1	0	0	1	0	0	0	0	0	0	0	0	0	0	0	0	0	0	0	0	0	0	0	0	0	0	0	0
BGC0000592	1	0	0	1	0	0	0	0	0	0	0	0	0	0	0	0	0	0	0	0	0	0	0	0	0	0	0	0
BGC0000594	1	0	0	1	0	0	0	0	0	0	0	0	0	0	0	0	0	0	0	0	0	0	0	0	0	0	0	0
BGC0000599	1	0	0	0	0	0	0	0	0	0	0	0	0	0	0	0	0	0	0	0	0	0	0	0	0	0	0	0
BGC0000600	2	0	0	1	0	0	0	0	0	0	0	0	0	0	0	0	0	0	0	0	0	0	0	0	0	0	0	0
BGC0000601	1	0	0	0	0	0	0	0	0	0	0	0	0	0	0	0	0	0	0	0	0	0	0	0	0	0	0	0
BGC0000602	1	0	0	0	0	0	0	0	0	0	0	0	0	0	0	0	0	0	0	0	0	0	0	0	0	0	0	0
BGC0000603	0	0	0	0	0	0	0	0	0	0	0	1	0	0	0	0	0	0	0	0	0	0	0	0	0	0	0	0
BGC0000605	1	0	0	0	0	0	1	0	0	0	0	0	0	0	0	0	0	0	0	0	0	0	0	0	0	0	0	0
BGC0000611	1	0	0	0	0	0	0	0	0	2	0	0	0	0	2	0	0	0	0	0	0	0	0	0	0	0	0	0
BGC0000612	2	0	0	0	0	0	0	0	0	0	0	0	0	0	0	0	0	0	0	0	0	0	0	0	0	0	0	0
BGC0000616	1	0	0	0	0	0	0	0	0	0	0	0	0	0	0	0	0	0	0	0	0	0	0	0	0	0	0	0
BGC0000617	1	0	0	1	0	0	0	0	0	0	0	0	0	0	0	0	0	0	0	0	0	0	0	0	0	0	0	0
BGC0000619	1	0	0	1	0	0	0	0	0	0	0	0	0	0	0	0	0	0	0	0	0	0	0	0	0	0	0	0
BGC0000620	1	0	0	0	0	0	0	0	0	0	0	0	0	0	0	0	0	0	0	0	0	0	0	0	0	0	0	0
BGC0000623	1	0	0	1	0	0	0	0	0	0	0	0	0	0	0	0	0	0	0	0	0	0	0	0	0	0	0	0
BGC0000624	1	0	0	1	0	0	0	0	0	0	0	0	0	0	0	0	0	0	0	0	0	0	0	0	0	0	0	0
BGC0000626	2	0	0	1	0	0	0	0	0	0	0	0	0	0	0	1	0	0	0	0	0	0	0	0	0	0	0	0
BGC0000627	0	0	0	0	0	0	0	0	0	0	0	1	0	0	0	0	0	0	0	0	0	0	0	0	0	0	0	0
BGC0000634	1	0	0	0	0	0	0	0	0	0	0	0	0	2	0	0	0	0	0	0	0	0	0	0	0	0	0	0
BGC0000637	0	0	0	0	0	0	0	0	0	0	0	0	0	0	0	0	2	0	0	0	0	0	0	0	0	0	0	0
BGC0000643	1	0	0	0	0	0	0	0	0	0	0	0	0	2	0	0	0	0	0	0	0	0	0	0	0	0	0	0
BGC0000651	1	0	0	0	0	0	1	0	0	0	0	0	0	0	0	0	0	0	0	0	0	0	0	0	0	0	0	0
BGC0000652	0	0	0	0	0	0	0	0	0	0	0	3	0	0	0	0	0	0	0	0	0	0	0	0	0	0	0	0
BGC0000653	0	0	0	0	0	0	0	0	0	0	0	1	0	0	0	0	0	0	0	0	0	0	0	0	0	0	0	0
BGC0000655	1	0	0	0	0	0	0	0	0	2	0	0	0	0	2	0	0	0	0	0	0	0	0	0	0	0	0	0
BGC0000662	0	0	0	0	0	0	0	0	0	0	0	2	0	0	0	0	0	0	0	0	0	0	0	0	0	0	0	0
BGC0000676	0	0	0	0	0	0	0	0	0	0	0	1	0	0	0	0	0	0	0	0	0	0	0	0	0	0	0	0
BGC0000678	0	0	0	0	0	0	0	0	0	0	0	1	0	0	0	0	0	0	0	0	0	0	0	0	0	0	0	0
BGC0000679	1	0	0	1	0	0	0	0	0	0	0	0	0	0	0	0	2	0	0	0	0	0	0	0	0	0	0	0
BGC0000688	0	0	0	0	0	0	0	0	0	0	0	1	0	0	0	0	0	0	0	0	0	0	0	0	0	0	0	0
BGC0000689	0	0	0	0	0	0	0	0	0	0	0	1	0	0	0	0	0	0	0	0	0	0	0	0	0	0	0	0
BGC0000690	1	0	0	2	0	0	0	0	0	0	0	0	0	0	0	0	0	0	0	0	0	0	0	0	0	0	0	0
BGC0000691	1	2	0	0	0	0	0	0	0	0	0	0	0	0	0	0	0	0	0	0	0	0	1	0	0	0	0	0
BGC0000692	2	0	0	2	0	0	0	0	0	0	0	0	0	0	0	0	0	0	0	0	0	0	0	0	0	0	0	0
BGC0000693	1	0	0	2	0	0	0	0	0	0	0	0	0	0	0	0	0	0	0	0	0	0	0	0	0	0	0	0
BGC0000695	0	0	0	0	0	0	0	0	0	0	0	1	0	0	0	0	0	0	0	0	0	0	0	0	0	0	0	0
BGC0000696	1	0	0	0	0	0	1	0	0	0	0	2	0	0	0	0	0	0	0	0	0	0	0	0	0	0	0	0
BGC0000698	2	0	0	0	0	0	0	0	0	0	1	0	0	0	0	0	0	0	0	0	0	0	0	0	0	0	0	0
BGC0000699	3	0	0	2	0	1	0	0	0	0	0	0	0	0	0	0	0	0	0	0	0	1	0	0	0	0	0	0
BGC0000700	0	0	0	0	0	0	0	0	0	0	0	1	0	0	0	0	0	0	0	0	0	0	0	0	0	0	0	0
BGC0000702	1	0	0	0	0	0	0	0	0	0	0	1	0	0	0	0	0	0	0	0	0	0	0	0	0	0	0	0
BGC0000703	7	2	0	0	0	1	0	0	0	0	0	1	0	0	0	0	0	2	0	0	0	1	0	0	0	1	1	0
BGC0000704	3	0	0	0	0	0	0	0	0	0	0	2	0	0	0	0	0	2	0	0	0	0	0	0	0	1	0	0
BGC0000705	3	0	0	0	0	0	0	0	0	0	0	2	0	0	0	0	0	2	0	0	0	0	0	0	0	0	0	0
BGC0000706	1	0	0	0	0	0	0	0	0	0	0	0	0	0	0	0	0	0	0	0	0	0	0	0	0	0	0	0
BGC0000708	3	0	0	2	0	2	0	0	0	0	0	0	0	0	0	0	0	0	0	0	0	1	0	0	0	0	0	0
BGC0000709	2	0	0	2	0	0	0	0	0	0	0	0	0	0	0	0	0	0	0	0	0	0	0	0	0	0	0	0
BGC0000711	2	0	0	2	0	0	0	0	0	0	0	0	0	0	0	0	0	0	0	0	0	0	0	0	0	0	0	0
BGC0000712	2	0	0	2	0	0	0	0	0	0	0	0	0	0	0	0	0	0	0	0	0	0	0	0	0	0	0	0
BGC0000713	2	0	0	2	0	0	0	0	0	0	0	0	0	0	0	0	0	0	0	0	0	0	0	0	0	0	0	0
BGC0000714	0	0	0	0	0	0	0	0	0	0	0	2	0	0	0	0	0	0	0	0	0	0	0	0	0	0	0	0
BGC0000715	0	0	0	0	0	0	0	0	0	0	0	1	0	0	0	0	0	0	0	0	0	0	1	0	0	0	0	0
BGC0000716	0	0	0	0	0	0	0	0	0	0	1	0	0	0	0	0	0	0	0	0	0	0	1	0	0	0	0	0
BGC0000719	0	0	0	0	0	0	0	0	0	0	0	1	0	0	0	0	0	0	0	0	0	0	0	0	0	0	0	0
BGC0000720	0	0	0	0	0	0	0	0	0	0	0	1	0	0	0	0	0	0	0	0	0	0	0	0	0	0	0	0
BGC0000721	0	0	0	0	0	0	0	0	0	0	0	1	0	0	0	0	0	0	0	0	0	0	0	0	0	0	0	0
BGC0000722	0	0	0	0	0	0	0	0	0	0	0	1	0	0	0	0	0	0	0	0	0	0	0	0	0	0	0	0
BGC0000723	0	0	0	0	0	0	0	0	0	0	0	1	0	0	0	0	0	0	0	0	0	0	0	0	0	0	0	0
BGC0000724	2	0	0	2	0	0	0	0	0	0	0	0	0	0	0	0	0	0	0	0	0	0	0	0	0	0	0	0
BGC0000734	1	0	0	0	0	0	1	0	0	0	0	0	0	0	0	0	0	0	0	0	0	0	0	0	0	0	0	0
BGC0000735	1	0	0	0	0	0	1	0	0	0	0	0	0	0	0	0	0	0	0	0	0	0	0	0	0	0	0	0
BGC0000736	1	0	0	0	0	0	1	0	0	0	0	0	0	0	0	0	0	0	0	0	0	0	0	0	0	0	0	0
BGC0000758	0	0	0	0	0	0	0	0	0	0	0	1	0	0	0	0	0	0	0	0	0	0	0	0	0	0	0	0
BGC0000759	1	0	0	1	0	0	0	0	0	0	0	0	0	0	0	0	0	0	0	0	0	0	0	0	0	0	0	0
BGC0000762	1	0	0	0	0	0	0	0	0	0	0	0	0	0	0	0	0	0	0	0	0	0	0	0	0	0	0	0
BGC0000768	1	0	1	1	0	0	0	0	0	0	0	0	0	0	0	0	0	0	0	0	0	0	0	0	0	0	0	0
BGC0000772	1	0	0	0	0	0	1	0	0	0	0	0	0	0	0	0	0	0	0	0	0	0	0	0	0	0	0	0
BGC0000774	1	0	0	0	0	0	1	0	0	0	0	0	0	0	0	0	0	0	0	0	0	0	0	0	0	0	0	0
BGC0000775	1	0	0	0	0	0	1	0	0	0	0	0	0	0	0	0	0	0	0	0	0	0	0	0	0	0	0	0
BGC0000782	1	0	0	0	0	0	1	0	0	0	0	0	0	0	0	0	0	0	0	0	0	0	0	0	0	0	0	0
BGC0000783	1	0	0	0	0	0	1	0	0	0	0	0	0	0	0	0	0	0	0	0	0	0	0	0	0	0	0	0
BGC0000785	1	0	0	0	0	0	1	0	0	0	0	0	0	0	0	0	0	0	0	0	0	0	0	0	0	0	0	0
BGC0000792	1	0	0	0	0	0	1	0	0	0	0	0	0	0	0	0	0	0	0	0	0	0	0	0	0	0	0	0
BGC0000794	1	0	0	0	0	0	1	0	0	0	0	0	0	0	0	0	0	0	0	0	0	0	0	0	0	0	0	0
BGC0000795	1	0	0	0	0	0	1	0	0	0	0	0	0	0	0	0	0	0	0	0	0	0	0	0	0	0	0	0
BGC0000796	1	0	0	0	0	0	1	0	0	0	0	0	0	0	0	0	0	0	0	0	0	0	0	0	0	0	0	0
BGC0000797	1	0	0	1	0	0	0	2	0	0	0	0	0	0	0	0	0	0	0	0	0	0	0	0	0	0	0	0
BGC0000801	1	0	0	1	0	0	0	0	0	0	0	0	0	0	0	0	0	0	0	0	0	0	0	0	0	0	1	0
BGC0000802	2	0	0	1	0	0	0	0	0	0	0	0	0	0	0	0	0	0	0	0	0	0	0	0	0	0	0	0
BGC0000804	1	2	0	0	0	0	0	0	0	0	0	0	0	0	0	0	0	0	0	0	0	0	1	0	0	2	0	0
BGC0000806	0	0	0	0	0	0	0	0	0	0	0	1	0	0	0	0	0	0	0	0	0	0	0	0	0	0	0	0
BGC0000807	1	0	0	0	0	0	1	0	0	0	0	1	0	0	0	0	0	0	0	0	0	0	0	0	0	0	0	0
BGC0000809	0	0	0	0	0	0	0	0	0	0	0	1	0	0	0	0	0	0	0	0	0	0	0	0	0	0	0	0
BGC0000814	4	2	0	0	0	0	0	0	0	0	0	1	0	0	0	0	0	0	0	0	0	0	0	0	0	0	1	0
BGC0000818	0	0	0	0	0	0	0	0	0	0	0	1	0	0	0	0	0	0	0	0	0	0	0	0	0	0	0	0
BGC0000821	0	0	0	0	0	0	0	0	0	0	0	1	0	0	0	0	0	0	0	0	0	0	0	0	0	0	0	0
BGC0000822	0	0	0	0	0	0	0	0	0	0	0	1	0	0	0	0	0	0	0	0	0	0	0	0	0	0	0	0
BGC0000833	0	0	0	0	0	0	0	0	0	0	0	1	0	0	0	0	0	0	0	0	0	0	0	0	0	0	0	0
BGC0000836	0	0	0	0	0	0	0	0	0	0	0	0	0	0	0	0	1	0	0	0	0	0	0	0	0	0	0	0
BGC0000837	0	0	0	0	0	0	0	0	0	0	0	0	0	0	0	0	2	0	0	0	0	0	0	0	0	0	0	0
BGC0000838	1	0	0	0	0	0	0	0	0	0	0	0	0	2	0	0	2	0	0	0	0	0	0	0	0	0	0	0
BGC0000839	0	0	0	0	0	0	0	0	0	0	0	0	0	0	0	0	2	0	0	0	0	0	0	0	0	0	0	0
BGC0000840	0	0	0	0	0	0	0	0	0	0	0	0	0	0	0	0	1	0	0	0	0	0	0	0	0	0	0	0
BGC0000842	0	0	0	0	0	0	0	0	0	0	0	1	0	0	0	0	0	0	0	0	0	0	0	0	0	0	0	0
BGC0000846	0	0	0	0	0	0	0	0	0	0	0	1	0	0	0	0	0	0	0	0	0	0	0	0	0	0	0	0
BGC0000847	0	0	0	0	0	0	0	0	0	0	0	1	0	0	0	0	0	0	0	0	0	0	0	0	0	0	0	0
BGC0000862	0	0	1	0	0	0	0	0	0	0	0	0	0	0	0	0	0	0	0	0	0	0	0	0	0	0	0	0
BGC0000872	2	0	0	2	0	0	0	0	0	0	0	0	0	0	0	0	0	0	0	0	0	0	0	0	0	0	0	0
BGC0000873	2	0	0	0	0	0	0	0	0	0	1	1	0	0	0	0	0	0	0	0	0	0	0	0	0	0	0	0
BGC0000874	1	0	0	0	0	0	0	0	0	0	0	1	0	0	0	0	0	0	0	0	0	0	0	0	0	0	0	0
BGC0000877	0	0	0	0	0	0	0	0	0	0	0	1	0	0	0	0	0	0	0	0	0	0	0	0	0	0	0	0
BGC0000880	1	0	0	0	0	0	1	0	0	0	0	0	0	0	0	0	0	0	0	0	0	0	0	0	0	0	0	0
BGC0000882	2	0	0	0	0	0	0	0	0	0	0	1	0	0	0	0	0	0	0	0	0	0	0	0	0	0	0	0
BGC0000883	0	0	0	0	0	0	0	0	0	0	0	2	0	0	0	0	0	0	0	0	0	0	0	0	0	0	0	0
BGC0000885	0	0	0	0	0	0	0	0	0	0	0	1	0	0	0	0	0	0	0	0	0	0	0	0	0	0	0	0
BGC0000887	0	0	0	0	0	0	0	2	0	0	0	0	0	0	0	0	0	0	0	0	0	0	0	0	0	0	0	0
BGC0000888	0	0	0	0	0	0	0	0	0	0	0	1	0	0	0	0	0	0	0	0	0	0	0	0	0	0	0	0
BGC0000889	0	0	0	0	0	0	0	0	0	0	0	1	0	0	0	0	0	0	0	0	0	0	0	0	0	0	0	0
BGC0000892	0	0	0	0	0	0	0	0	2	0	0	1	0	0	0	0	0	0	0	0	0	0	0	0	0	0	0	0
BGC0000893	0	0	0	0	0	0	0	0	0	0	0	1	0	0	0	0	0	0	0	0	0	0	0	0	0	0	0	0
BGC0000897	0	0	0	0	0	0	0	0	0	0	0	1	0	0	0	0	0	0	0	0	0	0	0	0	0	0	0	0
BGC0000903	0	0	0	0	0	0	0	0	0	0	0	1	0	0	0	0	0	0	0	0	0	0	0	0	0	0	0	0
BGC0000907	2	0	0	0	0	0	0	0	0	0	0	1	0	0	0	0	0	0	0	0	0	0	0	0	0	0	0	0
BGC0000908	0	0	0	0	0	0	0	0	0	0	0	1	0	0	0	0	0	0	0	0	0	0	0	0	0	0	0	0
BGC0000914	0	0	0	0	0	0	0	0	0	0	0	1	0	0	0	0	0	0	0	0	0	0	0	0	0	0	0	0
BGC0000915	0	0	0	0	0	0	0	0	0	0	0	1	0	0	0	0	0	0	0	0	0	0	0	0	0	0	0	0
BGC0000916	1	1	0	0	0	0	0	0	0	0	0	0	0	0	0	0	0	0	0	0	0	0	0	1	0	0	0	0
BGC0000925	0	0	1	0	0	0	0	0	0	0	0	2	0	0	0	0	0	0	0	0	0	0	0	0	0	0	0	0
BGC0000926	0	0	0	0	0	0	0	0	0	0	0	1	0	0	0	0	0	0	0	0	0	0	0	0	0	0	0	0
BGC0000928	0	0	0	0	0	0	0	4	0	0	0	0	0	0	0	0	0	0	0	0	0	0	0	0	0	0	0	0
BGC0000930	0	0	0	0	0	0	0	0	0	0	0	1	0	0	0	0	0	0	0	0	0	0	0	0	0	0	0	0
BGC0000932	2	1	0	0	0	0	0	0	0	0	0	0	0	0	0	0	0	0	0	0	0	0	0	0	0	0	1	0
BGC0000934	2	0	0	2	0	0	0	0	0	0	0	0	0	0	0	0	0	0	0	0	0	0	0	0	0	0	0	0
BGC0000935	0	0	0	0	0	0	0	0	0	0	0	1	0	0	0	0	0	0	0	0	0	0	0	0	0	0	0	0
BGC0000937	0	0	0	0	0	0	0	0	0	0	0	1	0	0	0	0	0	0	0	0	0	0	0	0	0	0	0	0
BGC0000938	1	2	0	0	0	0	0	0	0	0	0	2	0	0	0	0	0	0	0	0	0	0	0	0	0	0	0	0
BGC0000939	1	0	1	0	0	2	0	0	0	0	0	1	0	0	0	0	0	0	0	0	0	1	0	0	0	0	0	0
BGC0000943	0	0	0	0	0	2	0	0	0	0	0	1	0	0	0	0	0	0	0	0	0	1	0	0	0	0	0	0
BGC0000944	0	0	0	0	0	0	0	0	0	0	1	0	0	0	0	0	0	0	0	0	0	0	0	0	0	0	0	0
BGC0000946	0	0	0	0	0	0	0	0	0	0	0	1	0	0	0	0	0	0	0	0	0	0	0	0	0	0	0	0
BGC0000947	1	0	2	0	0	2	0	0	0	0	0	2	0	0	0	0	0	0	0	0	0	1	0	0	0	0	0	0
BGC0000949	3	0	0	2	0	0	0	0	0	0	0	1	0	0	0	0	0	0	0	0	0	0	0	0	0	0	0	0
BGC0000950	0	0	0	0	0	0	0	0	0	0	1	0	0	0	0	0	0	0	0	0	0	0	0	0	0	0	0	0
BGC0000951	0	0	0	0	0	0	0	0	0	0	1	0	0	0	0	0	0	0	0	0	0	0	0	0	0	0	0	0
BGC0000953	2	0	0	0	0	0	0	0	0	0	0	1	0	0	0	0	0	0	0	0	0	0	0	0	0	0	0	0
BGC0000955	0	0	0	0	0	0	0	0	0	0	0	1	0	0	0	0	0	0	0	0	0	0	0	0	0	0	0	0
BGC0000956	0	0	0	0	0	0	0	0	0	0	0	1	0	0	0	0	0	0	0	0	0	0	0	0	0	0	0	0
BGC0000959	0	0	0	0	0	0	0	0	0	0	0	1	0	0	0	0	0	0	0	0	0	0	0	0	0	0	0	0
BGC0000960	0	0	0	0	0	0	0	0	0	0	0	1	0	0	0	0	0	0	0	0	0	0	0	0	0	0	0	0
BGC0000961	0	0	0	0	0	0	0	0	0	0	0	1	0	0	0	0	0	0	0	0	0	0	0	0	0	0	0	0
BGC0000965	1	0	0	0	0	0	0	0	0	0	0	2	0	0	0	0	2	0	0	0	0	0	0	0	0	0	0	1
BGC0000966	2	0	0	2	0	0	0	0	0	0	0	1	0	0	0	0	0	0	0	0	0	0	0	0	0	0	0	0
BGC0000967	1	0	0	1	0	0	0	0	0	0	0	0	0	0	0	0	0	0	0	0	0	0	0	0	0	0	0	0
BGC0000972	0	0	0	0	0	0	0	2	0	0	0	0	0	0	0	0	0	0	0	0	0	0	0	0	0	0	0	0
BGC0000973	3	0	0	2	0	1	0	0	0	0	0	0	0	0	0	0	0	0	0	0	0	1	0	0	0	0	0	0
BGC0000977	0	0	0	0	0	0	0	0	0	0	0	1	0	0	0	0	0	0	0	0	0	0	0	0	0	0	0	0
BGC0000978	0	0	0	0	0	0	0	2	0	0	0	0	0	0	0	0	0	0	0	0	0	0	0	0	0	0	0	0
BGC0000981	0	0	0	0	0	0	0	3	0	0	0	0	0	0	0	0	0	0	0	0	0	0	0	0	0	0	0	0
BGC0000992	0	0	0	0	0	0	0	0	0	0	0	1	0	0	0	0	0	0	0	0	0	0	0	0	0	0	0	0
BGC0000997	0	0	0	0	0	0	0	0	0	0	0	1	0	0	0	0	0	0	0	0	0	0	0	0	0	0	0	0
BGC0000998	1	0	0	0	0	0	2	0	0	0	0	0	0	0	0	0	0	0	0	0	0	0	0	0	0	0	0	0
BGC0001003	0	0	0	0	0	0	0	0	0	0	0	1	0	0	0	0	0	0	0	0	0	0	0	0	0	0	0	0
BGC0001004	0	0	0	0	0	0	0	0	0	0	0	2	0	0	0	0	0	0	0	0	0	0	0	0	0	0	0	0
BGC0001005	2	0	0	0	1	0	0	0	0	1	0	0	0	0	0	0	0	0	0	0	0	0	0	0	0	0	0	0
BGC0001008	0	0	0	0	0	0	0	0	0	0	0	1	0	0	0	0	0	0	0	0	0	0	0	0	0	0	0	0
BGC0001009	1	0	0	1	0	0	0	0	0	0	0	0	0	0	0	0	0	0	0	0	0	0	0	0	0	0	0	0
BGC0001010	1	0	0	1	0	0	0	0	0	0	0	0	0	0	0	0	0	0	0	0	0	0	0	0	0	0	0	0
BGC0001011	0	2	0	0	0	0	0	0	0	0	0	2	0	0	0	0	0	0	0	0	0	0	1	0	0	0	0	0
BGC0001014	2	0	1	2	0	0	0	0	0	0	0	0	0	0	0	0	0	0	0	0	0	0	0	0	0	0	0	0
BGC0001015	1	0	0	1	0	0	0	0	0	0	0	0	0	0	0	0	0	0	0	0	0	0	0	0	0	0	0	0
BGC0001016	1	0	0	1	0	0	0	0	0	0	0	0	0	0	0	0	0	0	0	0	0	0	0	0	0	0	0	0
BGC0001017	1	0	0	1	0	0	0	0	0	0	0	0	0	0	0	0	0	0	0	0	0	0	0	0	0	0	0	0
BGC0001018	1	0	0	1	0	0	0	0	0	0	0	0	0	0	0	0	0	0	0	0	0	0	0	0	0	0	0	0
BGC0001019	0	0	0	0	0	0	0	0	0	0	0	1	0	0	0	0	0	0	0	0	0	0	0	0	0	0	0	0
BGC0001020	1	0	0	0	0	0	0	0	0	0	0	1	0	0	0	0	0	0	0	0	0	0	0	0	0	0	0	0
BGC0001026	0	0	0	0	0	0	0	0	0	0	0	1	0	0	0	0	0	0	0	0	0	0	0	0	0	0	0	0
BGC0001028	1	0	0	1	0	0	0	0	0	0	0	0	0	0	0	0	0	0	0	0	0	0	0	0	0	0	0	0
BGC0001033	1	0	0	0	0	0	0	0	0	0	0	0	0	0	0	0	0	0	0	0	0	0	0	0	0	0	0	0
BGC0001035	2	0	0	1	0	0	0	0	0	0	0	0	0	0	0	0	0	0	0	0	0	0	0	0	0	0	0	0
BGC0001036	1	0	0	0	0	0	1	0	0	0	0	0	0	0	0	0	0	0	0	0	0	0	0	0	0	0	0	0
BGC0001038	0	0	0	0	0	0	0	0	0	0	0	1	0	0	0	0	0	0	0	0	0	0	0	0	0	0	0	0
BGC0001040	1	0	0	0	0	0	0	0	0	2	0	2	0	0	0	0	0	0	0	0	0	0	0	0	0	0	0	0
BGC0001044	2	0	0	2	0	0	0	0	0	0	0	0	0	0	0	0	0	0	0	0	0	0	0	0	0	0	0	0
BGC0001046	0	0	0	0	0	0	0	0	0	0	0	1	0	0	0	0	0	0	0	0	0	0	0	0	0	0	0	0
BGC0001047	0	0	0	0	0	0	0	0	0	0	0	1	0	0	0	0	0	0	0	0	0	0	0	0	0	0	0	0
BGC0001048	1	0	0	1	0	0	0	0	0	0	0	0	0	0	0	0	0	0	0	0	0	0	0	0	0	0	0	0
BGC0001051	2	0	0	0	0	0	0	0	0	0	0	0	0	0	0	0	0	2	0	0	0	0	0	0	0	1	0	0
BGC0001052	0	0	0	0	0	0	0	0	0	0	0	1	0	0	0	0	0	0	0	0	0	0	0	0	0	0	0	0
BGC0001055	2	0	1	2	0	0	0	2	0	0	0	1	0	0	0	0	0	0	0	0	0	0	0	0	0	0	0	0
BGC0001056	2	0	0	0	0	0	0	0	0	1	0	0	0	2	1	0	0	0	0	0	0	0	0	0	0	0	0	0
BGC0001057	0	0	0	0	0	0	0	0	0	0	0	1	0	0	0	0	0	0	0	0	0	0	0	0	0	0	0	0
BGC0001058	1	0	0	0	0	0	0	0	0	0	0	0	0	0	0	0	0	0	0	0	0	0	0	0	0	0	0	0
BGC0001059	1	0	0	0	0	0	0	0	0	0	0	1	0	0	0	0	0	0	0	0	0	0	0	0	0	0	0	0
BGC0001060	2	0	0	0	0	0	1	0	0	0	0	0	2	0	0	0	0	0	0	0	0	0	0	0	0	0	0	0
BGC0001061	1	0	0	0	0	0	1	0	0	0	0	0	0	0	0	0	0	0	0	0	0	0	0	0	0	0	0	0
BGC0001062	0	0	0	0	0	0	0	0	0	0	0	2	0	0	0	0	0	0	0	0	0	0	0	0	0	0	0	0
BGC0001065	2	4	0	0	0	2	0	0	0	0	0	4	0	0	0	0	2	0	0	0	0	1	1	0	0	0	0	0
BGC0001070	0	0	0	0	0	0	0	0	0	0	1	4	0	0	0	0	0	0	0	0	0	0	0	0	0	0	0	0
BGC0001071	0	0	0	0	0	0	0	2	0	0	0	0	0	0	0	0	0	0	0	0	0	0	0	0	0	0	0	0
BGC0001072	0	0	0	0	0	0	0	0	0	0	0	1	0	0	0	0	0	0	0	0	0	0	0	0	0	0	0	0
BGC0001073	1	0	0	0	0	0	1	0	0	0	0	1	0	0	0	0	0	0	0	0	0	0	0	0	0	0	0	0
BGC0001074	2	0	0	0	0	0	1	0	0	0	0	0	0	0	0	0	0	0	0	0	0	0	0	0	0	0	0	0
BGC0001075	0	0	0	0	0	0	0	0	0	0	0	1	0	0	0	0	0	0	0	0	0	0	0	0	0	0	0	0
BGC0001076	2	0	0	2	0	0	0	0	0	0	0	0	0	0	0	0	0	0	0	0	0	0	0	0	0	0	0	0
BGC0001079	0	0	0	0	0	0	0	0	0	0	0	4	0	0	0	0	0	0	0	0	0	0	0	0	0	0	0	0
BGC0001083	0	0	0	0	0	0	0	0	0	0	0	2	0	0	0	0	0	0	0	0	0	0	0	0	0	0	0	0
BGC0001084	0	0	0	0	0	0	0	0	0	0	0	1	0	0	0	0	0	0	0	0	0	0	0	0	0	0	0	0
BGC0001088	0	0	0	0	0	0	0	0	0	0	0	1	0	0	0	0	0	0	0	0	0	0	0	0	0	0	0	0
BGC0001093	0	2	0	0	0	0	0	0	0	0	0	1	0	0	0	0	0	0	0	0	0	0	1	0	0	0	0	0
BGC0001094	0	0	0	0	0	0	0	2	0	0	0	0	0	0	0	0	0	0	0	0	0	0	0	0	0	0	0	0
BGC0001100	4	0	0	0	0	0	0	0	0	0	0	0	0	0	0	0	0	0	0	0	0	0	0	0	0	0	0	0
BGC0001101	6	2	0	0	0	0	0	0	0	0	1	2	0	0	0	0	0	0	0	0	0	0	0	0	0	0	1	0
BGC0001106	0	0	0	0	0	0	0	0	0	0	0	1	0	0	0	0	0	0	0	0	0	0	0	0	0	1	0	0
BGC0001111	2	0	0	0	0	0	0	0	0	0	0	0	0	0	0	0	0	0	0	0	0	0	0	0	0	0	0	0
BGC0001116	2	0	0	0	0	0	0	0	0	0	0	0	0	0	0	0	0	0	0	0	0	0	0	0	0	0	0	0
BGC0001117	1	0	0	0	0	0	1	0	0	0	0	0	0	0	0	0	0	0	0	0	0	0	0	0	0	0	0	0
BGC0001118	0	0	0	0	0	0	0	0	0	0	0	1	0	0	0	0	0	0	0	0	0	0	0	0	0	0	0	0
BGC0001119	0	0	0	0	0	0	0	0	0	0	0	1	0	0	0	0	0	0	0	0	0	0	0	0	0	0	0	0
BGC0001120	4	2	0	0	1	0	0	0	2	0	0	0	0	0	0	0	0	0	0	0	0	0	0	0	0	0	0	1
BGC0001122	0	0	0	0	0	0	0	0	0	0	0	1	0	0	0	0	0	0	0	0	0	0	0	0	0	0	0	0
BGC0001123	1	0	0	1	0	0	0	0	0	0	0	1	0	0	0	0	0	0	0	0	0	0	0	0	0	0	0	0
BGC0001125	1	0	0	0	0	0	0	0	0	0	0	0	0	0	0	0	0	0	0	0	0	0	0	0	0	0	0	0
BGC0001126	0	0	0	0	0	0	0	0	0	1	0	0	0	0	0	0	0	0	0	0	0	0	0	0	0	0	0	0
BGC0001127	1	0	0	0	0	0	0	0	0	0	0	0	0	0	0	0	0	0	0	0	0	0	0	0	0	0	0	0
BGC0001130	1	0	0	0	0	0	0	0	0	0	0	0	0	2	0	0	0	0	0	0	0	0	0	0	0	0	0	0
BGC0001131	0	0	0	0	0	0	0	0	0	0	0	1	0	0	0	0	0	0	0	0	0	0	0	0	0	0	0	0
BGC0001133	2	0	0	0	0	0	0	0	0	0	0	0	0	0	0	0	0	0	0	0	0	0	0	0	0	0	0	0
BGC0001138	2	0	0	0	0	0	0	0	0	0	1	0	0	0	0	0	0	0	0	0	0	0	0	0	0	0	0	0
BGC0001140	0	0	0	0	0	0	0	0	0	0	0	1	0	0	0	0	0	0	0	0	0	0	0	0	0	0	0	0
BGC0001142	0	0	0	0	0	0	0	0	0	0	0	1	0	0	0	0	0	0	0	0	0	0	0	0	0	0	0	0
BGC0001143	0	0	0	0	0	0	0	0	0	0	0	1	0	0	0	0	0	0	0	0	0	0	0	0	0	0	0	0
BGC0001148	2	0	0	2	0	0	0	0	0	0	1	0	0	0	0	0	0	0	0	0	0	0	0	0	0	0	0	0
BGC0001149	0	0	0	0	0	0	0	0	2	0	0	0	0	0	0	0	0	0	0	0	0	0	0	0	0	0	0	0
BGC0001150	0	0	0	0	0	0	0	0	0	0	0	1	0	0	0	0	0	0	0	0	0	0	0	0	0	0	0	0
BGC0001151	0	0	0	0	0	0	0	0	0	0	0	1	0	0	0	0	0	0	0	0	0	0	0	0	0	0	0	0
BGC0001153	2	0	0	2	0	0	0	0	0	0	0	0	0	0	0	0	0	0	0	0	0	0	0	0	0	0	0	0
BGC0001154	0	0	0	0	0	0	0	0	0	0	0	1	0	0	0	0	0	0	0	0	0	0	0	0	0	0	0	0
BGC0001156	0	0	0	0	0	0	0	0	0	0	0	1	0	0	0	0	0	0	0	0	0	0	0	0	0	0	0	0
BGC0001157	0	0	0	0	0	0	0	0	0	0	1	0	0	0	0	0	0	0	0	0	0	0	0	0	0	0	0	0
BGC0001159	1	0	0	0	0	0	2	0	0	0	0	0	0	0	0	0	0	0	0	0	0	0	0	0	0	0	0	0
BGC0001170	1	0	0	0	0	0	0	0	0	0	0	0	0	4	0	0	0	0	0	0	0	0	0	0	0	0	0	0
BGC0001171	1	0	0	0	0	0	1	0	0	0	0	0	0	0	0	0	0	0	0	0	0	0	0	0	0	0	0	0
BGC0001172	0	0	0	0	0	0	0	0	0	0	0	1	0	0	0	0	0	0	0	0	0	0	0	0	0	0	0	0
BGC0001173	1	0	0	0	0	0	1	0	0	0	0	0	0	0	0	0	0	0	0	0	0	0	0	0	0	0	0	0
BGC0001176	1	0	0	1	0	0	0	0	0	0	0	0	0	0	0	0	0	0	0	0	0	0	0	0	0	0	0	0
BGC0001177	0	0	0	0	0	0	0	0	0	0	1	0	0	0	0	0	0	0	0	0	0	0	0	0	0	0	0	0
BGC0001178	1	0	0	1	0	0	0	0	0	0	0	0	0	0	0	0	0	0	0	0	0	0	0	0	0	0	0	0
BGC0001179	1	1	0	0	0	0	0	0	0	0	0	1	0	0	0	0	0	0	0	0	1	0	0	0	0	0	0	0
BGC0001183	0	0	0	0	0	0	0	1	0	0	0	1	0	0	0	0	0	0	0	0	0	0	0	0	0	0	0	0
BGC0001184	0	0	0	0	0	0	0	0	0	0	0	2	0	0	0	0	0	0	0	0	0	0	0	0	0	0	0	0
BGC0001188	1	0	0	1	0	0	0	0	0	0	0	0	0	0	0	0	0	0	0	0	0	0	0	0	0	0	0	0
BGC0001189	1	0	1	0	0	0	0	0	0	0	0	0	0	0	0	0	0	0	0	0	0	0	0	0	0	0	0	0
BGC0001190	0	0	0	0	0	0	0	0	0	0	0	2	0	0	0	0	0	0	0	0	0	0	0	0	0	0	0	0
BGC0001192	2	0	0	2	0	0	0	0	0	0	0	0	0	0	0	0	0	0	0	0	0	0	0	0	0	0	0	0
BGC0001193	0	0	0	0	0	0	0	0	0	0	0	2	0	0	0	0	0	0	0	0	0	0	0	0	0	0	0	0
BGC0001194	0	0	0	0	0	0	0	0	0	0	0	1	0	0	0	0	0	0	0	0	0	0	0	0	0	0	0	0
BGC0001196	3	0	0	0	0	0	0	0	0	1	0	0	0	0	1	0	0	1	0	0	0	0	0	0	0	2	0	0
BGC0001199	0	0	0	0	0	0	0	0	0	0	0	1	0	0	0	0	0	0	0	0	0	0	0	0	0	0	0	0
BGC0001200	1	0	0	0	0	0	0	0	0	0	0	1	0	0	0	0	0	1	0	0	0	0	0	0	0	1	0	0
BGC0001205	0	0	0	0	0	0	0	0	0	0	0	2	0	0	0	0	0	0	0	0	0	0	0	0	0	0	0	0
BGC0001207	1	0	0	1	1	0	0	0	2	0	0	0	0	0	0	0	0	0	0	0	0	0	0	0	0	0	0	0
BGC0001210	2	0	0	1	0	0	0	0	0	0	0	0	0	0	0	2	0	0	0	0	0	0	0	0	0	0	0	0
BGC0001211	2	0	0	2	0	2	0	0	0	0	0	0	0	0	0	0	0	0	0	0	0	1	0	0	0	0	0	0
BGC0001213	2	0	0	2	0	0	0	0	0	0	0	1	0	0	0	0	0	0	0	0	0	0	0	0	0	0	0	0
BGC0001214	2	0	0	0	0	0	0	0	0	0	0	0	0	0	0	0	0	0	0	0	0	0	0	0	0	0	0	0
BGC0001221	0	0	0	0	0	0	0	0	0	0	0	1	0	0	0	0	0	0	0	0	0	0	0	0	0	0	0	0
BGC0001222	1	0	0	0	0	0	0	0	0	0	0	0	0	0	0	0	0	0	0	0	0	0	0	0	0	0	0	0
BGC0001228	2	0	0	0	0	0	1	0	0	0	0	0	0	0	0	0	0	0	0	0	0	0	0	0	0	0	0	0
BGC0001229	1	0	0	1	0	0	0	0	0	0	0	0	0	0	0	0	0	0	0	0	0	0	0	0	0	0	0	0
BGC0001231	0	0	0	0	0	0	0	0	0	0	0	2	0	0	0	0	0	0	0	0	0	0	0	0	0	0	0	0
BGC0001233	1	0	0	1	0	0	0	0	0	0	0	0	0	0	0	0	0	0	0	0	0	0	0	0	0	0	0	0
BGC0001246	0	0	0	0	0	0	0	0	0	0	0	1	0	0	0	0	0	0	0	0	0	0	0	0	0	0	0	0
BGC0001255	0	0	0	0	0	0	0	0	0	0	0	1	0	0	0	0	0	0	0	0	0	0	0	0	0	0	0	0
BGC0001277	0	0	0	0	0	0	0	0	0	0	0	1	0	0	0	0	0	0	0	0	0	0	0	0	0	0	0	0
BGC0001278	0	0	0	0	0	0	0	0	0	0	0	1	0	0	0	0	0	0	0	0	0	0	0	0	0	0	0	0
BGC0001281	2	0	0	2	0	0	0	0	0	0	0	1	0	0	0	0	0	0	0	0	0	0	0	0	0	0	0	0
BGC0001283	1	2	0	0	0	0	0	0	0	0	0	1	0	0	0	0	0	0	0	1	0	0	0	0	0	0	0	0
BGC0001286	0	0	0	0	0	0	0	0	0	0	0	1	0	0	0	0	0	0	0	0	0	0	0	0	0	0	0	0
BGC0001288	1	0	0	0	0	0	0	0	0	0	0	1	0	0	0	0	0	0	0	0	0	0	0	0	0	0	0	0
BGC0001289	1	0	0	1	0	0	0	0	0	0	0	0	0	0	0	0	0	0	0	0	0	0	0	0	0	0	0	0
BGC0001291	1	0	0	0	0	0	0	0	0	0	0	0	0	0	0	0	0	0	0	0	0	0	0	0	0	0	0	0
BGC0001292	2	0	0	2	0	0	0	0	0	0	0	0	0	0	0	0	0	0	0	0	0	0	0	0	0	0	0	0
BGC0001295	0	0	0	0	0	0	0	0	0	0	1	1	0	0	0	0	0	0	0	0	0	0	0	0	0	0	0	0
BGC0001297	1	0	0	0	0	0	1	0	0	0	0	0	0	0	0	0	0	0	0	0	0	0	0	0	0	0	0	0
BGC0001298	0	0	0	0	0	0	0	0	0	0	0	1	0	0	0	0	0	0	0	0	0	0	0	0	0	0	0	0
BGC0001299	2	0	0	0	0	0	0	0	0	1	0	0	0	2	2	0	0	0	0	0	0	0	0	0	0	0	0	0
BGC0001300	1	0	0	0	0	0	0	0	0	0	0	1	0	2	0	0	0	0	0	0	0	0	0	0	0	0	0	0
BGC0001301	1	0	0	0	0	0	1	0	0	0	0	1	0	0	0	0	0	0	0	0	0	0	0	0	0	0	0	0
BGC0001302	0	0	0	0	0	0	0	0	0	0	0	2	0	0	0	0	0	0	0	0	0	0	0	0	0	0	0	0
BGC0001303	2	0	0	0	0	0	1	0	0	2	0	1	0	0	0	0	0	0	0	0	0	0	0	0	0	0	0	0
BGC0001305	0	0	0	0	0	0	0	0	0	0	0	1	0	0	0	0	0	0	0	0	0	0	0	0	0	0	0	0
BGC0001306	0	0	0	0	0	0	0	0	0	0	0	1	0	0	0	0	0	0	0	0	0	0	0	0	0	0	0	0
BGC0001311	2	0	0	1	0	0	0	0	0	0	0	0	0	0	0	1	0	0	0	0	0	0	0	0	0	0	0	0
BGC0001312	1	0	1	0	0	0	0	0	0	1	0	0	0	0	1	0	0	0	0	0	0	0	0	0	0	0	0	1
BGC0001327	1	0	0	1	0	0	0	0	0	0	0	0	0	0	0	0	0	0	0	0	0	0	0	0	0	0	0	0
BGC0001328	1	0	0	1	0	0	0	0	0	0	0	0	0	0	0	0	0	0	0	0	0	0	0	0	0	0	0	0
BGC0001329	1	0	0	1	0	0	0	0	0	0	0	0	0	0	0	0	0	0	0	0	0	0	0	0	0	0	0	0
BGC0001330	1	0	0	0	0	0	0	0	0	0	0	0	0	0	0	0	2	0	0	0	0	0	0	0	0	0	0	0
BGC0001331	1	0	0	0	0	0	0	0	0	0	0	0	0	0	0	0	1	0	0	0	0	0	0	0	0	0	0	0
BGC0001335	0	0	0	0	0	0	0	0	0	0	0	0	0	0	0	0	2	0	0	0	0	0	0	0	0	0	0	0
BGC0001336	0	0	0	0	0	0	0	0	0	0	0	4	0	0	0	0	0	0	0	0	0	0	0	0	0	0	0	0
BGC0001338	0	0	0	0	0	0	0	0	0	0	0	1	0	0	0	0	0	0	0	0	0	0	0	0	0	0	0	0
BGC0001339	0	0	0	0	0	0	0	0	0	0	0	4	0	0	0	0	0	0	0	0	0	0	0	0	0	0	0	0
BGC0001340	0	0	0	0	0	0	0	0	0	0	0	2	0	0	0	0	0	0	0	0	0	0	0	0	0	0	0	0
BGC0001341	1	0	0	0	0	0	0	0	0	0	0	0	0	0	0	0	0	0	0	0	0	0	0	0	0	0	0	0
BGC0001343	1	0	0	0	0	0	0	0	0	2	0	0	0	0	1	0	0	0	0	0	0	0	0	0	0	0	0	0
BGC0001345	0	0	0	0	0	0	0	0	0	0	0	2	0	0	0	0	0	0	0	0	0	0	0	0	0	0	0	0
BGC0001346	1	0	0	0	0	0	0	0	2	1	0	0	0	0	1	0	0	0	0	0	0	0	0	0	0	0	0	0
BGC0001349	0	0	0	0	0	0	0	0	0	0	0	1	0	0	0	0	0	0	0	0	0	0	0	0	0	0	0	0
BGC0001356	1	0	0	1	0	0	0	0	0	0	0	0	0	0	0	0	0	0	0	0	0	0	0	0	0	0	0	0
BGC0001358	2	0	0	1	0	0	0	0	0	0	0	0	0	0	0	0	0	0	0	0	0	0	0	0	0	0	0	0
BGC0001362	2	1	0	0	0	0	0	0	0	0	0	0	0	0	0	0	0	0	0	0	0	0	0	0	0	0	1	0
BGC0001363	1	0	0	1	0	0	0	0	0	0	0	0	0	0	0	0	0	0	0	0	0	0	0	0	0	0	0	0
BGC0001364	1	0	0	0	0	0	1	0	0	0	0	0	0	0	0	0	0	0	0	0	0	0	0	0	0	1	0	0
BGC0001365	0	0	0	0	0	0	0	0	0	0	0	1	0	0	0	0	0	0	0	0	0	0	0	0	0	0	0	0
BGC0001366	0	0	0	0	0	0	0	0	0	0	0	1	0	0	0	0	0	0	0	0	0	0	0	0	0	0	0	0
BGC0001368	0	0	0	0	0	0	0	0	0	0	0	1	0	0	0	0	0	0	0	0	0	0	0	0	0	0	0	0
BGC0001369	0	0	0	0	0	0	0	0	0	0	0	0	0	0	0	0	2	0	0	0	0	0	0	0	0	0	0	0
BGC0001370	2	0	0	1	0	0	0	0	0	0	0	0	0	0	0	0	0	0	0	0	0	0	0	0	0	0	0	0
BGC0001371	2	0	0	1	0	0	0	0	0	0	0	0	0	0	0	0	0	0	0	0	0	0	0	0	0	0	0	0
BGC0001373	0	0	0	0	0	0	0	0	0	0	0	1	0	0	0	0	0	0	0	0	0	0	0	0	0	0	0	0
BGC0001377	0	0	0	0	0	0	0	0	0	0	0	2	0	0	0	0	0	0	0	0	0	0	0	0	0	0	0	0
BGC0001378	0	0	0	0	0	0	0	0	0	0	0	2	0	0	0	0	0	0	0	0	0	0	0	0	0	0	0	0
BGC0001379	2	0	0	2	0	0	0	0	0	0	0	0	0	0	0	0	0	0	0	0	0	0	0	0	0	0	0	0
BGC0001381	1	0	0	0	0	0	2	0	0	0	0	1	0	0	0	0	0	0	0	0	0	0	0	0	0	0	0	0
BGC0001384	0	0	0	0	0	0	0	0	0	0	0	4	0	0	0	0	0	0	0	0	0	0	0	0	0	0	0	0
BGC0001387	0	0	0	0	0	0	0	0	0	0	0	1	0	0	0	0	0	0	0	0	0	0	0	0	0	0	0	0
BGC0001388	1	0	0	1	0	0	0	0	0	0	0	0	0	0	0	0	0	0	0	0	0	0	0	0	0	0	0	0
BGC0001389	1	0	0	0	1	0	0	0	2	1	0	0	0	0	1	0	0	0	0	0	0	0	0	0	0	0	0	0
BGC0001391	2	0	0	1	0	0	0	0	0	0	0	0	0	0	0	0	0	0	0	0	0	0	0	0	0	0	0	0
BGC0001392	2	0	1	1	0	0	0	0	2	0	0	2	2	0	0	0	0	0	0	0	0	0	0	0	0	0	0	0
BGC0001393	2	0	0	0	0	0	0	0	0	0	0	0	0	2	0	0	0	0	0	0	0	0	0	0	0	0	0	0
BGC0001395	3	0	0	2	0	0	0	0	0	0	0	0	0	0	0	0	0	0	0	0	0	0	0	0	0	0	0	0
BGC0001397	1	0	0	0	0	0	0	0	0	0	0	2	0	0	0	0	2	0	0	0	0	0	0	0	0	0	0	1
BGC0001399	0	0	0	0	0	0	0	0	0	0	0	1	0	0	0	0	0	0	0	0	0	0	0	0	0	0	0	0
BGC0001402	2	0	0	2	0	0	0	0	0	0	0	0	0	0	0	0	0	0	0	0	0	0	0	0	0	0	0	0
BGC0001404	0	0	0	0	0	0	0	0	0	0	0	1	0	0	0	0	0	0	0	0	0	0	0	0	0	0	0	0
BGC0001405	0	0	0	0	0	0	0	0	0	0	0	2	0	0	0	0	0	0	0	0	0	0	0	0	0	0	0	0
BGC0001406	1	2	0	0	0	0	0	0	0	0	0	0	0	0	0	0	0	0	0	0	0	0	1	0	0	1	0	0
BGC0001407	1	0	0	1	0	0	0	0	0	0	0	0	0	0	0	0	0	0	0	0	0	0	0	0	0	0	0	0
BGC0001408	0	0	1	0	0	0	0	0	0	0	0	1	0	0	0	0	0	0	0	0	0	0	0	0	0	0	0	0
BGC0001409	1	0	0	0	0	0	1	0	0	0	0	0	0	0	0	0	0	0	0	0	0	0	0	0	0	0	0	0
BGC0001412	0	0	1	0	0	0	0	0	0	0	0	0	0	0	0	0	0	0	0	0	0	0	0	0	0	0	0	0
BGC0001413	1	0	0	0	0	0	0	0	0	2	0	0	0	0	0	0	0	0	0	0	0	0	0	0	0	0	0	0
BGC0001415	0	0	0	0	0	0	0	0	0	0	0	1	0	0	0	0	0	0	0	0	0	0	0	0	0	0	0	0
BGC0001416	1	0	0	1	0	0	0	0	2	0	0	1	0	0	0	0	0	0	0	0	0	0	0	0	0	0	0	0
BGC0001418	2	0	0	0	0	0	0	0	0	2	0	0	0	0	0	0	0	0	0	0	0	0	0	0	0	0	0	0
BGC0001419	2	0	0	0	0	0	0	0	0	2	0	0	0	0	0	0	0	0	0	0	0	0	0	0	0	0	0	0
BGC0001421	2	0	0	0	0	0	0	0	0	0	0	0	0	0	0	0	0	0	0	0	0	0	0	0	0	0	0	0
BGC0001422	2	0	0	0	0	0	0	0	0	0	0	0	0	0	0	0	0	0	0	0	0	0	0	0	0	0	0	0
BGC0001423	2	0	0	0	0	0	0	0	0	0	0	0	0	0	0	0	0	0	0	0	0	0	0	0	0	0	0	0
BGC0001424	2	0	0	0	0	0	0	0	0	0	0	0	0	0	0	0	0	0	0	0	0	0	0	0	0	0	0	0
BGC0001425	2	0	0	0	0	0	0	0	0	0	0	0	0	0	0	0	0	0	0	0	0	0	0	0	0	0	0	0
BGC0001426	2	0	0	0	0	0	0	0	0	0	0	0	0	0	0	0	0	0	0	0	0	0	0	0	0	0	0	0
BGC0001427	2	0	0	0	0	0	0	0	0	0	0	0	0	0	0	0	0	0	0	0	0	0	0	0	0	0	0	0
BGC0001428	2	0	0	0	0	0	0	0	0	0	0	0	0	0	0	0	0	0	0	0	0	0	0	0	0	0	0	0
BGC0001429	2	0	0	0	0	0	0	0	0	4	0	0	0	0	4	0	0	0	0	0	0	0	0	0	0	0	0	0
BGC0001431	2	0	0	0	0	0	0	0	0	4	0	0	0	0	4	0	0	0	0	0	0	0	0	0	0	0	0	0
BGC0001436	0	0	0	0	0	0	0	0	0	0	0	3	0	0	0	0	0	0	0	0	0	0	0	0	0	0	0	0
BGC0001438	0	0	0	0	0	0	0	0	0	0	0	2	0	0	0	0	0	0	0	0	0	0	0	0	0	0	0	0
BGC0001439	0	0	0	0	0	0	0	0	0	0	0	1	0	0	0	0	0	0	0	0	0	0	0	0	0	0	0	0
BGC0001440	0	0	0	0	0	0	0	0	0	0	0	1	0	0	0	0	0	0	0	0	0	0	0	0	0	0	0	0
BGC0001441	0	0	0	0	0	0	0	0	0	0	0	1	0	0	0	0	0	0	0	0	0	0	0	0	0	0	0	0
BGC0001442	0	0	0	0	0	0	0	0	0	0	0	2	0	0	0	0	0	0	0	0	0	0	0	0	0	1	0	0
BGC0001443	0	0	0	0	0	0	0	0	0	0	0	1	0	0	0	0	0	0	0	0	0	0	0	0	0	0	0	0
BGC0001445	0	0	0	0	0	0	0	0	0	0	0	1	0	0	0	0	0	0	0	0	0	0	0	0	0	0	0	0
BGC0001446	0	0	0	0	0	0	0	0	0	0	0	2	0	0	0	0	0	0	0	0	0	0	0	0	0	0	0	0
BGC0001447	2	0	0	0	0	0	1	0	0	0	0	0	0	0	0	0	0	0	0	0	0	0	0	0	0	0	0	0
BGC0001448	1	0	0	0	0	0	1	0	0	0	0	0	0	0	0	0	0	0	0	0	0	0	0	0	0	0	0	0
BGC0001449	0	0	0	0	0	0	0	0	0	0	0	1	0	0	0	0	0	0	0	0	0	0	0	0	0	0	0	0
BGC0001452	1	0	0	0	0	0	1	0	0	0	0	0	0	0	0	0	0	0	0	0	0	0	0	0	0	0	0	0
BGC0001459	1	0	0	1	0	0	0	0	0	0	0	0	0	0	0	0	0	0	0	0	0	0	0	0	0	0	0	0
BGC0001460	1	0	0	1	0	0	0	0	0	0	0	0	0	0	0	0	0	0	0	0	0	0	0	0	0	0	0	0
BGC0001461	1	0	0	1	0	0	0	0	0	0	0	0	0	0	0	0	0	0	0	0	0	0	0	0	0	0	0	0
BGC0001462	1	0	0	1	0	0	0	0	0	0	0	0	0	0	0	0	0	0	0	0	0	0	0	0	0	0	0	0
BGC0001468	0	0	0	0	0	0	0	0	0	0	0	1	0	0	0	0	0	0	0	0	0	0	0	0	0	0	0	0
BGC0001476	0	0	0	0	0	0	0	0	0	0	0	2	0	0	0	0	0	0	0	0	0	0	0	0	0	0	0	0
BGC0001480	0	0	0	0	0	0	0	0	2	0	0	1	0	0	0	0	0	0	0	0	0	0	0	0	0	0	0	0
BGC0001483	0	0	0	0	0	0	0	0	0	2	0	0	0	0	2	0	0	0	0	0	0	0	0	0	0	0	0	0
BGC0001484	2	0	0	2	0	0	0	0	0	0	0	1	0	0	0	0	0	2	0	0	0	0	0	0	0	0	0	0
BGC0001485	0	0	0	0	0	0	0	0	0	0	0	1	0	0	0	0	0	0	0	0	0	0	0	0	0	0	0	0
BGC0001486	0	0	0	0	0	0	0	0	0	0	0	2	0	0	0	0	0	0	0	0	0	0	0	0	0	0	0	0
BGC0001491	2	0	0	2	0	0	0	0	0	0	0	0	0	0	0	0	0	0	0	0	0	0	0	0	0	0	0	0
BGC0001492	2	2	0	0	0	0	0	0	0	0	0	1	0	0	0	0	0	0	0	0	0	0	0	0	0	0	1	0
BGC0001494	1	0	0	1	0	0	0	0	0	0	0	0	0	0	0	0	0	0	0	0	0	0	0	0	0	0	0	0
BGC0001496	2	0	0	1	0	0	0	0	0	0	0	0	0	0	0	0	0	0	0	0	0	0	0	0	0	0	0	0
BGC0001497	0	0	0	0	0	0	0	0	0	0	0	2	0	0	0	0	0	0	0	0	0	0	0	0	0	1	0	0
BGC0001498	1	0	1	0	0	0	0	0	0	0	0	1	0	0	0	0	0	0	0	0	0	1	0	0	0	0	0	0
BGC0001499	0	0	1	0	0	0	0	0	0	0	0	1	0	0	0	0	0	0	0	0	0	0	0	0	0	0	0	0
BGC0001500	0	0	0	0	0	0	0	0	0	0	0	1	0	0	0	0	0	0	0	0	0	0	0	0	0	0	0	0
BGC0001501	0	0	0	0	0	0	0	0	0	1	0	0	0	0	0	0	0	0	0	0	0	0	0	0	0	0	0	0
BGC0001503	0	0	0	0	0	0	0	0	0	0	0	1	0	0	0	0	0	0	0	0	0	0	0	0	0	0	0	0
BGC0001508	2	0	0	0	0	0	2	0	0	0	0	0	0	0	0	0	0	0	0	0	0	0	0	0	0	0	0	0
BGC0001509	1	0	0	0	0	0	0	0	2	1	0	0	0	0	1	0	0	0	0	0	0	0	0	0	0	0	0	0
BGC0001511	1	0	0	1	0	0	0	0	0	0	0	0	0	0	0	0	0	0	0	0	0	0	0	0	0	0	0	0
BGC0001512	0	0	0	0	0	0	0	0	0	0	0	2	0	0	0	0	0	0	0	0	0	0	0	0	0	0	0	0
BGC0001514	1	0	0	0	0	0	0	0	0	0	0	0	0	0	0	0	0	0	0	0	0	0	0	0	0	0	0	0
BGC0001515	2	0	0	1	0	0	0	0	0	0	0	1	0	0	0	0	0	0	0	0	0	0	0	0	0	0	0	0
BGC0001516	0	0	0	0	0	0	0	0	0	0	0	1	0	0	0	0	0	0	0	0	0	0	0	0	0	0	0	0
BGC0001518	0	0	0	0	0	0	0	0	0	0	0	1	0	0	0	0	0	0	0	0	0	0	0	0	0	0	0	0
BGC0001519	1	0	0	0	0	0	1	0	0	0	0	1	0	0	0	0	0	0	0	0	0	0	0	0	0	0	0	0
BGC0001520	0	0	0	0	0	0	0	4	0	0	0	0	0	0	0	0	0	0	0	0	0	0	0	0	0	0	0	0
BGC0001522	3	0	0	0	0	0	1	0	0	2	0	1	0	0	0	0	0	0	0	0	0	0	0	0	0	0	0	0
BGC0001524	1	0	0	1	0	0	0	0	0	0	0	0	0	0	0	0	0	0	0	0	1	0	0	0	1	0	0	0
BGC0001525	1	0	0	0	0	0	0	0	0	1	0	0	0	0	0	0	0	0	0	0	0	0	0	0	0	0	0	0
BGC0001526	1	0	0	0	0	0	0	0	0	1	0	0	0	0	0	0	0	0	0	0	0	0	0	0	0	0	0	0
BGC0001530	0	0	0	0	0	0	0	0	0	0	0	1	0	0	0	0	0	0	0	0	0	0	0	0	0	0	0	0
BGC0001531	0	0	0	0	0	0	0	0	0	0	0	1	0	0	0	0	0	0	0	0	0	0	0	0	0	0	0	0
BGC0001532	1	0	0	0	0	0	0	0	0	0	0	0	0	0	0	0	0	0	0	0	0	0	0	0	0	0	0	0
BGC0001536	2	0	0	2	0	0	0	0	0	0	0	1	0	0	0	0	0	0	0	0	0	0	0	0	0	0	0	0
BGC0001537	0	0	0	0	0	0	0	0	0	0	0	1	0	0	0	0	0	0	0	0	0	0	0	0	0	0	0	0
BGC0001538	0	0	0	0	0	0	0	0	0	0	0	1	0	0	0	0	0	0	0	0	0	0	0	0	0	0	0	0
BGC0001540	2	0	0	0	0	0	1	0	0	0	0	0	0	0	0	0	0	0	0	0	0	0	0	0	0	0	0	0
BGC0001541	0	0	0	0	0	0	0	0	0	0	0	2	0	0	0	0	0	0	0	0	0	0	0	0	0	0	0	0
BGC0001542	0	0	0	0	0	0	0	0	0	0	0	1	0	0	0	0	0	0	0	0	0	0	0	0	0	0	0	0
BGC0001543	2	2	0	0	0	0	0	0	0	0	0	1	0	0	0	0	0	0	0	0	2	0	0	0	0	0	1	0
BGC0001546	0	0	0	0	0	0	0	0	0	0	0	1	0	0	0	0	0	0	0	0	0	0	0	0	0	0	0	0
BGC0001549	1	0	0	1	0	0	0	0	0	0	0	0	0	0	0	0	0	0	0	0	0	0	0	0	0	0	0	0
BGC0001550	1	0	0	1	0	0	0	0	0	0	0	0	0	0	0	0	0	0	0	0	0	0	0	0	0	0	0	0
BGC0001551	1	0	0	1	0	0	0	0	0	0	0	0	0	0	0	0	0	0	0	0	0	0	0	0	0	0	0	0
BGC0001552	1	0	0	1	0	0	0	0	0	0	0	0	0	0	0	0	0	0	0	0	0	0	0	0	0	0	0	0
BGC0001553	1	2	0	0	0	0	0	0	0	0	0	0	0	0	0	0	0	0	0	0	0	0	0	0	0	0	0	0
BGC0001555	5	0	2	3	0	2	0	0	2	1	0	1	0	0	1	0	0	0	0	0	0	0	0	0	0	0	0	0
BGC0001556	0	0	0	0	0	0	0	0	0	0	0	1	0	0	0	0	0	0	0	0	0	0	0	0	0	0	0	0
BGC0001557	0	0	0	0	0	0	0	0	0	0	0	3	0	0	0	0	0	0	0	0	0	0	0	0	0	0	0	0
BGC0001558	2	0	0	0	0	0	1	0	0	0	0	0	0	0	0	0	0	0	0	0	0	0	0	0	0	0	0	0
BGC0001560	0	0	0	0	0	0	0	2	0	0	0	0	0	0	0	0	0	0	0	0	0	0	0	0	0	0	0	0
BGC0001561	1	0	0	0	0	0	0	0	0	1	1	0	0	0	0	0	0	0	0	0	0	0	0	0	0	0	0	0
BGC0001563	0	0	0	0	0	0	0	0	0	0	0	2	0	0	0	0	0	0	0	0	0	0	0	0	0	0	0	0
BGC0001564	0	0	0	0	0	0	0	2	0	0	0	0	0	0	0	0	0	0	0	0	0	0	0	0	0	0	0	0
BGC0001565	2	0	0	2	0	0	0	0	0	0	0	0	0	0	0	0	0	0	0	0	0	0	0	0	0	0	0	0
BGC0001568	2	0	0	0	0	0	1	0	0	0	0	0	0	0	0	0	0	0	0	0	0	0	0	0	0	0	0	0
BGC0001569	2	0	0	0	0	0	0	0	0	1	0	1	0	0	0	0	0	0	0	0	0	0	0	0	0	0	0	0
BGC0001570	0	0	0	0	0	0	0	0	0	0	1	0	0	0	0	0	0	0	0	0	0	0	0	0	0	0	0	0
BGC0001571	0	0	0	0	0	0	0	0	0	0	0	2	0	0	0	0	0	0	0	0	0	0	0	0	0	0	0	0
BGC0001572	0	0	0	0	0	0	0	0	0	0	0	1	0	0	0	0	0	0	0	0	0	0	0	0	0	0	0	0
BGC0001574	3	0	0	0	0	1	0	0	0	0	0	1	0	0	0	0	0	1	0	0	0	1	0	0	0	1	0	0
BGC0001575	0	0	0	0	0	0	0	2	0	0	0	0	0	0	0	0	0	0	0	0	0	0	0	0	0	0	0	0
BGC0001576	1	0	0	1	0	0	0	0	0	0	0	0	0	0	0	0	0	0	0	0	0	0	0	0	0	0	0	0
BGC0001579	1	0	0	0	0	0	1	0	0	0	0	0	0	0	0	0	0	0	0	0	0	0	0	0	0	0	0	0
BGC0001582	1	0	0	0	0	0	1	0	0	0	0	0	0	0	0	0	0	0	0	0	0	0	0	0	0	0	0	0
BGC0001583	0	0	0	0	0	0	0	0	0	0	0	1	0	0	0	0	0	0	0	0	0	0	0	0	0	0	0	0
BGC0001584	1	0	0	0	0	0	0	0	0	0	0	2	0	0	0	0	2	0	0	0	0	0	0	0	0	0	0	1
BGC0001585	2	0	0	2	0	0	0	0	0	0	0	0	0	0	0	0	0	0	0	0	0	0	0	0	0	0	0	0
BGC0001587	0	1	0	0	0	0	0	0	0	0	0	0	0	0	0	0	0	0	0	0	0	0	0	0	0	0	1	0
BGC0001590	2	2	0	0	0	0	0	0	0	0	0	1	1	0	0	0	0	0	0	0	1	0	0	0	0	0	0	0
BGC0001591	1	0	0	0	0	0	0	0	0	1	0	0	0	0	1	0	0	0	0	0	0	0	0	0	0	0	0	0
BGC0001592	0	0	0	0	0	0	0	0	0	0	0	1	0	0	0	0	0	0	0	0	0	0	0	0	0	0	0	0
BGC0001593	1	1	0	0	0	2	0	0	0	0	0	2	0	0	0	0	0	0	0	0	1	1	0	0	0	0	0	0
BGC0001594	0	0	0	0	0	0	0	0	0	1	0	0	0	0	0	0	0	0	0	0	0	0	0	0	0	0	0	0
BGC0001596	0	0	0	0	0	0	0	0	0	0	0	1	0	0	0	0	0	0	0	0	0	0	0	0	0	0	0	0
BGC0001597	0	0	0	0	0	0	0	0	0	0	0	1	0	0	0	0	0	0	0	0	0	0	0	0	0	0	0	0
BGC0001598	1	2	0	0	0	0	0	0	0	2	1	4	0	0	2	0	0	0	0	0	0	0	1	0	0	0	0	0
BGC0001602	1	0	0	1	0	0	0	0	0	0	0	0	0	0	0	0	0	0	0	0	0	0	0	0	0	0	0	0
BGC0001603	0	0	0	0	0	0	0	0	0	0	0	2	0	0	0	0	0	0	0	0	0	0	0	0	0	0	0	0
BGC0001606	2	0	0	2	0	0	0	0	0	0	0	0	0	0	0	0	0	0	0	0	0	0	0	0	0	0	0	0
BGC0001607	1	0	0	0	0	0	1	0	0	0	0	0	0	0	0	0	0	0	0	0	0	0	0	0	0	0	0	0
BGC0001608	0	0	0	0	0	0	0	0	0	0	0	1	0	0	0	0	0	0	0	0	0	0	0	0	0	0	0	0
BGC0001610	0	0	0	0	0	0	0	0	0	0	0	1	0	0	0	0	0	0	0	0	0	0	0	0	0	0	0	0
BGC0001611	0	0	0	0	0	0	0	0	0	0	0	1	0	0	0	0	0	0	0	0	0	0	0	0	0	0	0	0
BGC0001612	0	0	0	0	0	0	0	0	0	1	0	0	0	0	0	0	0	0	0	0	0	0	0	0	0	0	0	0
BGC0001614	1	0	0	1	0	0	0	0	0	0	0	2	0	0	0	0	0	0	0	0	0	0	0	0	0	0	0	0
BGC0001617	0	0	0	0	0	0	0	0	0	0	0	1	0	0	0	0	0	0	0	0	0	0	0	0	0	0	0	0
BGC0001618	1	0	0	0	0	0	0	0	0	0	0	0	0	0	0	0	0	0	0	0	0	0	0	0	0	0	0	0
BGC0001619	1	0	0	0	0	0	1	0	0	0	0	0	0	0	0	0	0	0	0	0	0	0	0	0	0	0	0	0
BGC0001620	1	0	0	0	0	0	1	0	0	0	0	0	0	0	0	0	0	0	0	0	0	0	0	0	0	0	0	0
BGC0001622	0	0	0	0	0	0	0	0	0	0	0	1	0	0	0	0	0	0	0	0	0	0	0	0	0	0	0	0
BGC0001623	1	0	0	0	0	0	1	0	0	0	0	0	0	0	0	0	0	0	0	0	0	0	0	0	0	0	0	0
BGC0001630	1	0	0	0	0	0	0	0	0	0	0	0	0	0	0	0	0	0	0	0	0	0	0	0	0	0	0	0
BGC0001634	1	0	0	1	0	0	0	0	0	0	0	0	0	0	0	0	0	0	0	0	0	0	0	0	0	0	0	0
BGC0001635	2	0	0	1	0	0	0	0	0	1	0	0	0	0	1	0	0	0	0	0	0	0	0	0	0	0	0	0
BGC0001636	2	0	0	2	0	0	0	0	0	0	0	0	0	0	0	0	0	0	0	0	0	0	0	0	0	0	0	0
BGC0001637	1	0	0	0	0	0	0	0	0	0	0	1	0	0	0	0	0	0	0	0	0	0	0	0	0	0	0	0
BGC0001638	1	0	0	1	0	0	0	0	0	0	0	0	0	0	0	0	0	0	0	0	0	0	0	0	0	0	0	0
BGC0001639	1	0	0	1	0	0	0	0	0	0	0	0	0	0	0	0	0	0	0	0	0	0	0	0	0	0	0	0
BGC0001640	1	0	0	1	0	0	0	0	0	0	0	0	0	0	0	0	0	0	0	0	0	0	0	0	0	0	0	0
BGC0001644	0	0	0	0	0	0	0	0	0	0	0	1	0	0	0	0	0	0	0	0	0	0	0	0	0	0	0	0
BGC0001645	1	0	0	1	0	0	0	0	0	0	0	0	0	0	0	0	0	0	0	0	0	0	0	0	0	0	0	0
BGC0001646	0	0	0	0	0	0	0	2	0	0	0	0	0	0	0	0	0	0	0	0	0	0	0	0	0	0	0	0
BGC0001648	0	0	0	0	0	0	0	0	0	0	0	1	0	0	0	0	0	0	0	0	0	0	0	0	0	0	0	0
BGC0001652	1	0	0	0	0	0	0	0	0	0	0	0	0	0	0	0	0	0	0	0	0	0	0	0	0	0	0	0
BGC0001655	1	0	0	0	0	0	1	0	0	0	0	0	0	0	0	0	0	0	0	0	0	0	0	0	0	0	0	0
BGC0001657	1	0	1	1	0	0	0	0	0	0	0	0	0	0	0	0	0	0	0	0	0	0	0	0	0	0	0	0
BGC0001658	1	0	0	0	0	0	1	0	0	0	0	0	0	0	0	0	0	0	0	0	0	0	0	0	0	0	0	0
BGC0001660	1	0	0	0	0	0	1	0	0	0	0	0	0	0	0	0	0	0	0	0	0	0	0	0	0	0	0	0
BGC0001661	0	0	0	0	0	0	0	0	0	0	0	1	0	0	0	0	0	0	0	0	0	0	0	0	0	0	0	0
BGC0001666	0	0	0	0	0	0	0	0	0	0	0	1	0	0	0	0	0	0	0	0	0	0	0	0	0	0	0	0
BGC0001667	1	0	0	1	0	0	0	0	0	0	0	0	0	0	0	0	0	0	0	0	0	0	0	0	0	0	0	0
BGC0001669	1	0	0	0	0	0	0	0	0	0	1	0	0	0	0	0	0	0	0	0	0	0	0	0	0	0	0	0
BGC0001670	0	0	0	0	0	0	0	0	0	0	0	1	0	0	0	0	0	0	0	0	0	0	0	0	0	0	0	0
BGC0001674	2	0	0	0	0	0	1	0	0	0	0	0	0	0	0	1	0	0	0	0	0	0	0	0	0	0	0	0
BGC0001675	0	0	0	0	0	0	0	0	0	0	0	2	0	0	0	0	2	0	0	0	0	0	0	0	0	0	0	0
BGC0001679	0	0	0	0	0	0	0	0	0	0	0	1	0	0	0	0	0	0	0	0	0	0	0	0	0	0	0	0
BGC0001684	1	0	0	0	0	0	0	0	0	0	0	0	0	2	0	0	0	0	0	0	0	0	0	0	0	0	0	0
BGC0001688	1	0	0	0	0	0	0	0	0	1	0	0	0	0	1	0	0	0	0	0	0	0	0	0	0	0	0	0
BGC0001690	2	0	0	2	0	0	0	0	0	0	1	0	0	0	0	0	0	0	0	0	0	0	0	0	0	0	0	0
BGC0001693	2	0	0	1	0	0	0	0	0	0	0	0	0	0	0	1	0	0	0	0	0	0	0	0	0	0	0	0
BGC0001694	2	2	0	0	0	0	0	0	0	0	0	1	0	0	0	0	0	0	0	0	0	0	0	0	0	0	1	0
BGC0001699	2	0	0	1	0	0	0	0	0	0	0	1	0	0	0	0	0	0	0	0	0	0	0	0	0	0	0	0
BGC0001701	2	0	0	0	0	0	0	0	0	0	0	0	0	0	0	0	0	0	0	0	0	0	0	0	0	0	0	0
BGC0001702	0	0	0	0	0	0	0	0	0	0	0	1	0	0	0	0	0	0	0	0	0	0	0	0	0	0	0	0
BGC0001705	1	0	0	1	0	0	0	0	0	0	0	0	0	0	0	0	0	0	0	0	0	0	0	0	0	0	0	0
BGC0001709	2	0	0	2	0	0	0	0	0	0	0	0	0	0	0	0	0	0	0	0	0	0	0	0	0	0	0	0
BGC0001711	1	0	0	1	0	0	0	0	0	0	0	0	0	0	0	0	0	0	0	0	0	0	0	0	0	0	0	0
BGC0001712	0	0	0	0	0	0	0	0	0	0	0	1	0	0	0	0	0	0	0	0	0	0	0	0	0	0	0	0
BGC0001713	0	0	1	0	0	0	0	0	0	0	0	2	0	0	0	0	0	0	0	0	0	0	0	0	0	0	0	0
BGC0001715	3	1	0	2	0	0	0	0	0	0	0	0	0	0	0	0	0	0	0	0	0	0	0	0	0	0	0	0
BGC0001716	1	0	0	1	0	0	0	0	0	0	0	0	0	0	0	0	0	0	0	0	0	0	0	0	0	0	0	0
BGC0001719	1	1	0	0	0	0	0	0	0	0	0	2	0	0	0	0	0	0	0	0	1	0	0	0	0	0	0	0
BGC0001720	0	0	0	0	0	0	0	0	0	0	0	1	0	0	0	0	0	0	0	0	0	0	0	0	0	0	0	0
BGC0001721	2	0	1	0	0	2	0	0	0	0	0	0	0	0	0	0	0	0	0	0	0	1	0	0	0	0	0	0
BGC0001724	0	0	0	0	0	0	0	0	0	0	0	1	0	0	0	0	0	0	0	0	0	0	0	0	0	0	0	0
BGC0001727	2	0	0	0	0	0	0	0	0	0	0	0	0	0	0	2	0	0	0	0	0	0	0	0	0	0	0	0
BGC0001728	1	0	0	0	0	0	0	0	0	1	0	2	0	0	1	0	0	0	0	0	0	0	0	0	0	0	0	0
BGC0001729	0	0	0	0	0	0	0	0	0	0	0	1	0	0	0	0	0	0	0	0	0	0	0	0	0	0	0	0
BGC0001730	0	0	0	0	0	0	0	0	0	0	0	1	0	0	0	0	0	0	0	0	0	0	0	0	0	0	0	0
BGC0001731	0	0	0	0	0	0	0	0	0	0	0	2	0	0	0	0	0	0	0	0	0	0	0	0	0	0	0	0
BGC0001732	0	0	0	0	0	0	0	0	0	0	0	2	0	0	0	0	0	0	0	0	0	0	0	0	0	0	0	0
BGC0001733	0	0	0	0	1	0	0	0	0	0	0	0	0	0	0	0	0	0	0	0	0	0	0	0	0	0	0	0
BGC0001735	0	0	0	0	0	0	0	0	0	0	0	1	0	0	0	0	0	0	0	0	0	0	0	0	0	0	0	0
BGC0001738	0	0	0	0	0	0	0	0	0	0	0	1	0	0	0	0	0	0	0	0	0	0	0	0	0	0	0	0
BGC0001739	0	0	0	0	0	0	0	0	0	0	0	1	0	0	0	0	0	0	0	0	0	0	0	0	0	0	0	0
BGC0001740	0	0	0	0	0	0	0	0	0	0	0	1	0	0	0	0	0	0	0	0	0	0	0	0	0	0	0	0
BGC0001741	0	0	0	0	0	0	0	0	0	0	0	1	0	0	0	0	0	0	0	0	0	0	0	0	0	0	0	0
BGC0001743	1	0	0	0	0	0	0	0	0	0	0	0	0	0	0	0	0	0	0	0	0	0	0	0	0	0	0	0
BGC0001748	1	0	0	1	0	0	0	0	0	0	0	0	0	0	0	0	0	0	0	0	0	0	0	0	0	0	0	0
BGC0001752	2	0	0	2	0	2	0	0	0	0	0	0	0	0	0	0	0	0	0	0	0	1	0	0	0	0	0	0
BGC0001754	1	0	0	1	0	0	0	0	0	0	0	0	0	0	0	0	0	0	0	0	0	0	0	0	0	0	0	0
BGC0001755	0	0	0	0	0	0	0	0	0	0	0	1	0	0	0	0	0	0	0	0	0	0	0	0	0	0	0	0
BGC0001759	1	0	0	0	0	0	0	0	0	0	0	1	0	0	0	0	0	0	0	0	0	0	0	0	0	0	0	0
BGC0001763	1	0	0	0	0	0	1	0	0	0	0	0	0	0	0	0	0	0	0	0	0	0	0	0	0	0	0	0
BGC0001764	1	1	0	0	0	0	0	0	0	0	0	0	0	0	0	0	0	0	0	0	0	0	0	0	0	0	0	0
BGC0001765	1	1	0	0	0	0	0	0	0	0	0	0	0	0	0	0	0	0	0	0	0	0	0	0	0	0	0	0
BGC0001767	1	0	0	0	0	2	0	0	0	0	0	0	0	0	0	0	0	0	0	0	0	1	0	0	0	0	0	0
BGC0001768	0	0	0	0	0	0	0	0	0	0	0	1	0	0	0	0	0	0	0	0	0	0	0	0	0	0	0	0
BGC0001769	0	0	0	0	0	0	0	0	0	0	1	2	0	0	0	0	0	0	0	0	0	0	0	0	0	0	0	0
BGC0001770	1	0	0	0	0	0	0	0	0	2	0	1	0	0	0	0	0	0	0	0	0	0	0	0	0	0	0	0
BGC0001773	1	0	0	0	0	0	1	0	0	0	0	0	0	0	0	0	0	0	0	0	0	0	0	0	0	0	0	0
BGC0001774	0	0	0	0	0	0	0	0	0	0	1	0	0	0	0	0	0	0	0	0	0	0	0	0	0	0	0	0
BGC0001778	0	0	0	0	0	0	0	0	0	0	0	1	0	0	0	0	0	0	2	0	0	0	0	0	0	0	0	0
BGC0001779	2	0	0	0	0	0	1	0	0	0	0	0	0	0	0	1	0	0	0	0	0	0	0	0	0	0	0	0
BGC0001783	0	0	0	0	0	0	0	0	0	0	0	4	0	0	0	0	0	0	0	0	0	0	0	0	0	0	0	0
BGC0001784	0	0	0	0	0	0	0	0	0	0	0	1	0	0	0	0	0	0	0	0	0	0	0	0	0	0	0	0
BGC0001786	0	0	1	0	0	0	0	0	0	0	0	0	0	0	0	0	0	0	0	0	0	0	0	0	0	0	0	0
BGC0001787	2	0	0	1	0	0	0	0	0	0	0	0	0	0	0	0	0	0	0	0	0	0	0	0	0	0	0	0
BGC0001788	2	0	0	1	0	0	0	0	0	0	0	0	0	0	0	2	0	0	0	0	0	0	0	0	0	0	0	0
BGC0001789	2	0	0	0	0	0	0	0	0	0	0	0	0	0	0	0	0	0	0	0	0	0	0	0	0	0	0	0
BGC0001790	0	0	0	0	1	0	0	0	2	0	1	0	0	0	0	0	0	0	0	0	0	0	0	0	0	0	0	0
BGC0001792	1	2	0	0	0	0	0	0	0	0	0	2	0	0	0	0	0	0	0	0	0	0	0	0	0	0	0	0
BGC0001796	0	0	0	0	0	0	0	0	0	0	1	0	0	0	0	0	0	0	0	0	0	0	0	0	0	0	0	0
BGC0001797	0	0	0	0	0	0	0	0	0	0	0	0	0	0	0	0	2	0	0	0	0	0	0	0	0	0	0	0
BGC0001800	0	0	0	0	0	0	0	0	0	0	0	1	0	0	0	0	0	0	0	0	0	0	0	0	0	0	0	0
BGC0001801	2	0	0	2	0	0	0	0	0	0	0	0	0	0	0	0	0	0	0	0	0	0	0	0	0	0	0	0
BGC0001804	0	0	0	0	0	0	0	0	0	0	0	2	0	0	0	0	0	0	0	0	0	0	0	0	0	0	0	0
BGC0001805	1	0	0	0	0	0	0	2	0	0	0	1	0	0	0	0	0	0	0	0	0	0	0	0	0	0	0	0
BGC0001807	0	0	0	0	0	0	0	0	0	0	0	2	0	0	0	0	0	0	0	0	0	0	0	0	0	0	0	0
BGC0001810	0	0	0	0	0	0	0	0	0	0	0	2	0	0	0	0	0	0	0	0	0	0	0	0	0	1	0	0
BGC0001811	0	0	0	0	0	0	0	0	0	0	0	1	0	0	0	0	0	0	0	0	0	0	0	0	0	0	0	0
BGC0001812	2	0	0	0	0	0	0	0	0	0	0	0	0	0	0	0	0	0	0	0	0	0	0	0	0	1	0	0
BGC0001813	0	0	0	0	0	0	0	0	0	0	1	0	0	0	0	0	0	0	0	0	0	0	0	0	0	0	0	0
BGC0001814	2	0	0	0	0	0	0	0	0	1	0	2	0	0	0	0	0	0	0	0	0	0	0	0	0	0	0	0
BGC0001815	0	0	0	0	0	0	0	0	0	0	0	2	0	0	0	0	0	0	0	0	0	0	0	0	0	0	0	0
BGC0001819	0	0	0	0	0	0	0	0	0	0	0	2	0	0	0	0	0	0	0	0	0	0	0	0	0	0	0	0
BGC0001820	2	0	0	2	0	0	0	0	0	0	0	0	0	0	0	0	0	0	0	0	0	0	0	0	0	0	0	0
BGC0001823	0	0	0	0	0	0	0	0	0	0	0	1	0	0	0	0	0	0	0	0	0	0	0	0	0	0	0	0
BGC0001827	2	0	0	0	0	0	2	0	0	0	0	1	0	0	0	0	0	0	0	0	0	0	0	0	0	0	0	0
BGC0001828	0	0	0	0	0	0	0	0	0	0	0	0	0	0	0	0	2	0	0	0	0	0	0	0	0	0	0	0
BGC0001830	2	0	0	0	0	0	0	0	0	0	0	0	0	0	0	0	0	0	0	0	0	0	0	0	0	0	0	0
BGC0001838	1	0	0	0	0	0	0	0	0	1	0	0	0	0	1	0	0	0	0	0	0	0	0	0	0	0	0	0
BGC0001842	1	0	0	0	0	0	0	0	0	1	0	0	0	0	1	0	0	0	0	0	0	0	0	0	0	0	0	0
BGC0001846	3	2	0	0	0	2	0	0	0	0	0	2	0	0	0	0	0	0	0	0	0	1	0	0	0	0	1	0
BGC0001848	0	0	0	0	0	0	0	0	0	0	0	0	0	0	0	0	2	0	0	0	0	0	0	0	0	0	0	0
BGC0001849	0	0	0	0	0	0	0	0	0	0	0	2	0	0	0	0	0	0	0	0	0	0	0	0	0	0	0	0
BGC0001851	1	0	0	0	0	0	1	0	0	0	0	0	0	0	0	0	0	0	0	0	0	0	0	0	0	0	0	0
BGC0001852	1	0	0	0	0	0	1	0	0	0	0	0	0	0	0	0	0	0	0	0	0	0	0	0	0	0	0	0
BGC0001856	1	0	0	0	0	0	1	0	0	0	0	1	0	0	0	0	0	0	0	0	0	0	0	0	0	0	0	0
BGC0001859	0	0	0	0	0	0	0	0	0	0	0	2	0	0	0	0	0	0	0	0	0	0	0	0	0	0	0	0
BGC0001861	1	0	0	1	0	0	0	0	0	0	0	0	0	0	0	0	0	0	0	0	0	0	0	0	0	0	0	0
BGC0001862	1	0	0	1	0	0	0	0	0	0	0	0	0	0	0	0	0	0	0	0	0	0	0	0	0	0	0	0
BGC0001863	1	0	0	1	0	0	0	0	0	0	0	0	0	0	0	0	0	0	0	0	0	0	0	0	0	0	0	0
BGC0001864	2	0	0	1	0	0	0	0	0	0	0	0	0	0	0	0	0	0	0	0	0	0	0	0	0	0	0	0
BGC0001865	0	0	0	0	0	0	0	0	0	0	0	1	0	0	0	0	0	0	0	0	0	0	0	0	0	0	0	0
BGC0001866	0	0	0	0	0	0	0	0	0	0	0	1	0	0	0	0	0	0	0	0	0	0	0	0	0	0	0	0
BGC0001870	1	0	1	0	0	2	0	0	0	0	0	0	0	0	0	0	0	0	0	0	0	1	0	0	0	0	0	0
BGC0001872	1	0	0	0	0	0	0	0	0	0	0	0	0	2	0	0	0	0	0	0	0	0	0	0	0	0	0	0
BGC0001877	1	0	0	0	0	0	1	0	0	0	1	0	0	0	0	0	0	0	0	0	0	0	0	0	0	0	0	0
BGC0001881	0	0	0	0	0	0	0	0	0	0	0	1	0	0	0	0	0	0	0	0	0	0	0	0	0	0	0	0
BGC0001882	0	0	0	0	0	0	0	0	0	0	0	2	0	0	0	0	0	0	0	0	0	0	0	0	0	0	0	0
BGC0001886	0	0	0	0	0	0	0	0	0	0	0	1	0	0	0	0	0	0	0	0	0	0	0	0	0	0	0	0
BGC0001887	2	0	0	1	0	0	0	0	0	0	0	0	0	0	0	0	0	0	0	0	0	0	0	0	0	0	0	0
BGC0001888	0	0	0	0	0	0	0	0	0	0	0	1	0	0	0	0	0	0	0	0	0	0	0	0	0	0	0	0
BGC0001889	1	0	0	1	0	0	0	0	0	0	0	0	0	0	0	0	0	0	0	0	0	0	0	0	0	0	0	0
BGC0001891	2	0	0	0	0	0	1	0	0	0	0	0	0	0	0	0	0	0	0	0	0	0	0	0	0	0	0	0
BGC0001894	0	0	0	0	0	0	0	1	0	0	0	0	0	0	0	0	0	0	0	0	0	0	0	0	0	0	0	0
BGC0001895	0	0	0	0	0	0	0	0	0	0	0	1	0	0	0	0	0	0	0	0	0	0	0	0	0	0	0	0
BGC0001897	0	0	0	0	0	0	0	0	0	0	0	1	0	0	0	0	0	0	0	0	0	0	0	0	0	0	0	0
BGC0001898	0	0	0	0	0	0	0	0	0	0	0	1	0	0	0	0	0	0	0	0	0	0	0	0	0	0	0	0
BGC0001901	2	0	0	1	0	0	0	0	0	0	0	0	0	0	0	0	0	0	0	0	0	0	0	0	0	0	0	0
BGC0001902	0	0	0	0	0	0	0	2	0	0	0	0	0	0	0	0	0	0	0	0	0	0	0	0	0	0	0	0
BGC0001907	0	0	0	0	0	0	0	0	0	0	0	2	0	0	0	0	0	0	0	0	0	0	0	0	0	0	0	0
BGC0001908	1	0	0	0	0	0	0	0	0	2	0	1	0	0	0	0	0	0	0	0	0	0	0	0	0	0	0	0
BGC0001913	0	0	0	0	0	0	0	0	0	0	0	2	0	0	0	0	0	0	0	0	0	0	0	0	0	0	0	0
BGC0001920	2	0	0	0	0	0	1	0	0	0	0	1	0	0	0	1	0	0	0	0	0	0	0	0	0	0	0	0
BGC0001921	2	0	0	0	0	0	1	0	0	0	0	0	0	0	0	1	0	0	0	0	0	0	0	0	0	0	0	0
BGC0001922	0	0	0	0	0	0	0	0	0	0	0	1	0	0	0	0	0	0	0	0	0	0	0	0	0	0	0	0
BGC0001925	0	0	0	0	0	0	0	0	0	0	0	1	0	0	0	0	0	0	0	0	0	0	0	0	0	0	0	0
BGC0001926	0	0	0	0	0	0	0	0	0	0	0	1	0	0	0	0	0	0	0	0	0	0	0	0	0	0	0	0
BGC0001927	1	0	0	0	0	0	1	0	0	0	0	0	0	0	0	0	0	0	0	0	0	0	0	0	0	0	0	0
BGC0001928	1	0	0	0	0	0	0	0	0	0	0	1	0	0	0	0	0	0	0	0	0	0	0	0	0	0	0	0
BGC0001929	0	0	0	0	0	0	0	1	0	0	0	0	0	0	0	0	0	0	0	0	0	0	0	0	0	0	0	0
BGC0001930	1	0	0	1	0	0	0	0	0	0	0	0	0	0	0	0	0	0	0	0	0	0	0	0	0	0	0	0
BGC0001931	2	0	0	0	0	0	0	0	0	0	0	0	0	0	0	0	0	0	0	0	0	0	0	0	0	0	0	0
BGC0001937	0	0	0	0	0	0	0	0	0	0	0	1	0	0	0	0	0	0	0	0	0	0	0	0	0	0	0	0
BGC0001939	0	0	0	0	0	0	0	0	0	0	0	1	0	0	0	0	0	0	0	0	0	0	0	0	0	0	0	0
BGC0001940	1	1	0	0	0	0	0	0	0	0	0	0	0	0	0	0	0	0	0	0	0	0	0	0	0	0	0	0
BGC0001942	2	0	0	2	0	0	0	0	0	0	0	0	0	0	0	0	0	0	0	0	0	0	0	0	0	0	0	0
BGC0001944	1	0	0	0	0	0	1	0	0	0	0	0	0	0	0	0	0	0	0	0	0	0	0	0	0	0	0	0
BGC0001945	0	0	0	0	0	0	0	0	0	0	1	0	0	0	0	0	0	0	0	0	0	0	0	0	0	0	0	0
BGC0001946	0	0	0	0	0	0	0	2	0	0	0	0	0	0	0	0	0	0	0	0	0	0	0	0	0	0	0	0
BGC0001948	0	0	0	0	0	0	0	0	0	0	0	1	0	0	0	0	0	0	0	0	0	0	0	0	0	0	0	0
BGC0001950	1	0	0	0	0	0	0	0	0	0	0	0	0	0	0	0	0	0	0	0	0	0	0	0	0	0	0	0
BGC0001951	1	0	0	0	0	0	0	0	0	0	0	0	0	0	0	0	0	0	0	0	0	0	0	0	0	0	0	0
BGC0001952	1	0	0	1	0	0	0	0	0	0	0	0	0	0	0	0	0	0	0	0	0	0	0	0	0	0	0	0
BGC0001953	1	0	0	1	0	0	0	0	0	0	0	0	0	0	0	0	0	0	0	0	0	0	0	0	0	0	0	0
BGC0001954	0	0	0	0	0	0	0	0	0	0	0	1	0	0	0	0	0	0	0	0	0	0	0	0	0	0	0	0
BGC0001955	1	0	0	1	0	0	0	0	0	0	0	0	0	0	0	0	0	0	0	0	0	0	0	0	0	0	0	0
BGC0001956	0	0	0	0	0	0	0	0	0	0	0	1	0	0	0	0	0	0	0	0	0	0	0	0	0	0	0	0
BGC0001957	0	0	0	0	0	0	0	0	0	0	0	1	0	0	0	0	0	0	0	0	0	0	0	0	0	0	0	0
BGC0001958	0	0	0	0	0	0	0	0	0	0	0	1	0	0	0	0	0	0	0	0	0	0	0	0	0	0	0	0
BGC0001959	0	0	0	0	0	0	0	0	0	0	0	1	0	0	0	0	0	0	0	0	0	0	0	0	0	0	0	0
BGC0001961	1	2	0	0	0	0	0	0	0	0	0	1	0	0	0	0	0	0	0	0	0	0	0	0	0	0	0	0
BGC0001962	0	1	0	0	0	0	0	0	0	0	0	0	0	0	0	0	0	0	0	1	0	0	0	0	0	0	0	0
BGC0001963	1	0	0	0	0	0	1	0	0	0	0	3	0	0	0	0	0	0	0	0	0	0	0	0	0	0	0	0
BGC0001964	1	1	0	0	0	0	0	0	0	0	0	0	0	0	0	0	0	0	0	0	0	0	0	1	0	0	0	0
BGC0001965	0	0	0	0	0	0	0	0	0	0	0	1	0	0	0	0	0	0	0	0	0	0	0	0	0	0	0	0
BGC0001966	2	0	0	0	0	0	0	0	0	0	0	1	0	0	0	0	0	0	0	0	0	0	0	0	0	0	0	0
BGC0001968	1	0	0	0	0	0	1	0	0	0	0	0	0	0	0	0	0	0	0	0	0	0	0	0	0	0	0	0
BGC0001972	0	0	0	0	0	0	0	0	0	0	0	2	0	0	0	0	0	0	0	0	0	0	0	0	0	0	0	0
BGC0001973	0	0	0	0	0	0	0	0	0	0	0	2	0	0	0	0	0	0	0	0	0	0	0	0	0	0	0	0
BGC0001975	1	0	0	0	0	0	1	0	0	0	0	0	0	0	0	0	0	0	0	0	0	0	0	0	0	0	0	0
BGC0001976	2	0	0	0	0	0	2	0	0	0	0	1	0	0	0	0	0	0	0	0	0	0	0	0	0	0	0	0
BGC0001977	2	0	0	0	0	0	2	0	0	0	0	1	0	0	0	0	0	0	0	0	0	0	0	0	0	0	0	0
BGC0001979	0	0	0	0	0	0	0	0	0	0	0	3	0	0	0	0	0	0	0	0	0	0	0	0	0	0	0	0
BGC0001980	1	0	0	0	0	0	0	0	2	1	0	0	0	0	1	0	0	0	0	0	0	0	0	0	0	0	0	0
BGC0001982	0	0	0	0	0	0	0	0	0	0	0	1	0	0	0	0	0	0	0	0	0	0	0	0	0	0	0	0
BGC0001983	0	0	0	0	0	0	0	0	0	0	0	1	0	0	0	0	0	0	0	0	0	0	0	0	0	0	0	0
BGC0001985	0	0	0	0	0	0	0	0	0	0	0	2	0	0	0	0	0	0	0	0	0	0	0	0	0	0	0	0
BGC0001987	0	0	0	0	0	0	0	0	0	0	0	0	0	0	0	0	2	0	0	0	0	0	0	0	0	0	0	0
BGC0001988	0	0	0	0	0	0	0	0	0	0	0	1	0	0	0	0	0	0	0	0	0	0	0	0	0	0	0	0
BGC0001989	0	0	0	0	0	0	0	0	0	0	0	1	0	0	0	0	0	0	0	0	0	0	0	0	0	0	0	0
BGC0001995	0	0	0	0	0	0	0	0	0	0	0	2	0	0	0	0	0	0	0	0	0	0	0	0	0	0	0	0
BGC0001996	0	0	0	0	0	0	0	0	0	0	0	3	0	0	0	0	0	0	0	0	0	0	0	0	0	0	0	0
BGC0001999	2	0	2	1	0	2	0	0	0	0	1	0	0	0	0	0	0	0	0	0	0	1	0	0	0	0	0	0
BGC0002000	0	0	0	0	0	0	0	0	0	0	0	1	0	0	0	0	0	0	0	0	0	0	0	0	0	0	0	0
BGC0002001	2	0	1	0	0	0	0	0	2	0	0	0	0	0	0	0	0	0	0	0	0	0	0	0	0	0	0	0
BGC0002003	0	0	0	0	0	0	0	0	0	0	0	1	0	0	0	0	0	0	0	0	0	0	0	0	0	0	0	0
BGC0002004	0	0	1	0	0	0	0	1	0	0	0	0	0	0	0	0	0	0	0	0	0	0	0	0	0	0	0	0
BGC0002005	1	0	0	1	0	0	0	0	0	0	0	0	0	0	0	0	0	0	0	0	0	0	0	0	0	0	0	0
BGC0002008	0	0	0	0	0	0	0	0	0	0	0	0	0	0	0	0	1	0	0	0	0	0	0	0	0	0	0	0
BGC0002009	2	0	0	2	0	0	0	0	0	0	0	0	0	0	0	0	0	0	0	0	0	0	0	0	0	0	0	0
BGC0002010	0	0	0	0	0	0	0	0	0	0	0	1	0	0	0	0	0	0	0	0	0	0	0	0	0	0	0	0
BGC0002011	3	2	0	1	0	0	0	0	0	0	0	2	0	0	0	0	0	0	0	0	0	0	0	0	0	0	1	0
BGC0002012	0	0	0	0	0	0	0	0	0	0	0	1	0	0	0	0	0	0	1	0	0	0	0	0	0	0	0	0
BGC0002014	1	0	0	0	0	0	1	0	0	0	0	0	0	0	0	0	0	0	0	0	0	0	0	0	0	0	0	0
BGC0002015	2	0	0	0	0	0	1	0	0	0	0	0	0	0	0	1	0	0	0	0	0	0	0	0	0	0	0	0
BGC0002016	0	0	0	0	0	0	0	0	0	0	1	2	0	0	0	0	0	0	0	0	0	0	0	0	0	0	0	0
BGC0002021	1	0	0	1	0	0	0	0	0	0	0	0	0	0	0	0	0	0	0	0	0	0	0	0	0	0	0	0
BGC0002025	1	0	0	1	0	0	0	0	0	0	0	1	0	0	0	0	0	0	0	0	0	0	0	1	0	0	0	0
BGC0002027	0	0	0	0	0	0	0	0	0	0	0	2	0	0	0	0	0	0	0	0	0	0	0	0	0	0	0	0
BGC0002028	0	0	0	0	0	0	0	0	0	0	0	1	0	0	0	0	0	0	0	0	0	0	0	0	0	0	0	0
BGC0002029	0	0	0	0	0	0	0	0	0	0	0	1	0	0	0	0	0	0	0	0	0	0	0	0	0	0	0	0
BGC0002030	0	0	0	0	0	0	0	0	0	0	0	1	0	0	0	0	0	0	0	0	0	0	0	0	0	0	0	0
BGC0002033	2	0	0	0	0	0	0	0	0	0	0	0	0	0	0	0	0	0	0	0	0	0	0	0	0	0	0	0
BGC0000591	0	0	0	0	0	0	0	0	0	0	0	0	0	0	0	0	0	0	0	0	1	0	0	0	0	0	0	0
BGC0000609	0	0	0	0	0	0	0	0	0	0	0	0	0	0	0	0	0	0	0	1	0	0	0	0	0	0	0	0
BGC0000813	0	0	0	0	0	0	0	0	0	0	0	0	0	0	0	0	0	0	0	0	1	0	0	0	0	0	0	0
BGC0000844	0	0	0	0	0	0	0	0	0	0	0	0	0	0	0	0	0	0	0	0	0	0	0	0	0	0	1	0
BGC0000845	0	0	0	0	0	0	0	0	0	0	0	0	0	0	0	0	0	0	0	0	0	0	0	0	0	0	2	0
BGC0000940	0	0	0	0	0	0	0	0	0	0	0	0	0	0	0	0	0	0	0	0	0	1	0	0	0	0	0	0
BGC0001029	0	0	0	0	0	0	0	0	0	0	0	0	0	0	0	0	0	0	0	1	0	0	0	0	0	0	0	0
BGC0001195	0	0	0	0	0	0	0	0	0	0	0	0	0	0	0	0	0	0	0	0	0	1	0	0	0	0	0	0
BGC0001224	0	0	0	0	0	0	0	0	0	0	0	0	0	0	0	0	0	0	0	0	0	0	0	0	1	0	0	0
BGC0001453	0	0	0	0	0	0	0	0	0	0	0	0	0	0	0	0	0	0	0	0	0	1	0	0	0	0	0	0
BGC0001782	0	0	0	0	0	0	0	0	0	0	0	0	0	0	0	0	0	0	0	0	0	0	0	0	0	1	0	0
BGC0001791	0	0	0	0	0	0	0	0	0	0	0	0	0	0	0	0	0	0	0	0	1	0	0	0	0	0	0	0
BGC0001836	0	0	0	0	0	0	0	0	0	0	0	0	0	0	0	0	0	0	0	0	0	0	0	0	0	1	0	0

## Sheet: Table S3 - Transporter CATHDB
BGC	3.40.50.300/FF/632839	1.10.3470.10/FF/21766	3.40.50.1980/FF/29562	1.20.1640.10/FF/24538	1.20.1250.20/FF/181070	1.20.1250.20/FF/180590	3.30.750.24/FF/8342	1.20.58.370/FF/1981	2.40.50.100/FF/50279	2.40.50.100/FF/42886	1.20.1640.10/FF/24424	1.20.1250.20/FF/180628	1.20.1250.20/FF/180940	2.40.160.10/FF/9684	1.20.1250.20/FF/180573	3.40.50.300/FF/628304	2.160.20.20/FF/2486	2.40.128.130/FF/4240	3.40.50.300/FF/627498	1.20.1250.20/FF/179298	1.20.1250.20/FF/179804	3.40.50.300/FF/628823	1.20.1250.20/FF/179738	1.10.3720.10/FF/58813	2.40.160.10/FF/9698	3.40.50.300/FF/631282	3.40.50.300/FF/631004	3.40.50.300/FF/633348	1.20.1250.20/FF/180137	1.20.1560.10/FF/26651	3.40.50.300/FF/630003	1.20.1250.20/FF/180239	1.20.1250.20/FF/179801	1.20.1250.20/FF/180267	3.40.50.300/FF/630576	3.40.50.300/FF/635508	2.170.130.10/FF/21034	3.40.50.300/FF/632367	2.40.170.20/FF/26209	3.40.50.300/FF/627204	3.40.190.10/FF/202538	1.20.1250.20/FF/178507	2.40.160.20/FF/9743	1.20.1250.20/FF/180946	1.20.1250.20/FF/180270	1.20.1640.10/FF/24590	1.20.1250.20/FF/180177	1.10.3720.10/FF/58808	3.40.190.10/FF/204263
BGC0000001	0	0	0	0	0	0	0	0	0	0	0	0	1	0	0	0	0	0	0	0	0	0	0	0	0	0	0	0	0	0	0	0	0	1	0	0	0	0	0	0	0	0	0	0	0	0	0	0	0
BGC0000002	0	0	0	0	0	0	0	0	0	0	0	0	0	0	0	0	0	0	0	0	0	0	0	0	0	0	0	0	0	1	0	0	0	0	0	0	0	0	0	1	0	0	0	0	0	0	0	0	0
BGC0000004	0	0	0	0	0	0	0	0	0	0	0	0	1	0	0	0	0	0	0	0	0	0	0	0	0	0	0	0	0	0	0	0	0	0	0	0	0	0	0	0	0	0	0	0	1	0	0	0	0
BGC0000006	0	0	0	0	0	0	0	0	0	0	0	0	1	0	0	0	0	0	0	0	0	0	0	0	0	0	0	0	0	0	0	0	0	0	0	0	0	0	0	0	0	0	0	0	1	0	0	0	0
BGC0000007	0	0	0	0	0	0	0	0	0	0	0	0	1	0	0	0	0	0	0	0	0	0	0	0	0	0	0	0	0	0	0	0	0	0	0	0	0	0	0	0	0	0	0	0	1	0	0	0	0
BGC0000008	0	0	0	0	0	0	0	0	0	0	0	0	1	0	0	0	0	0	0	0	0	0	0	0	0	0	0	0	0	0	0	0	0	0	0	0	0	0	0	0	0	0	0	0	1	0	0	0	0
BGC0000009	0	0	0	0	0	0	0	0	0	0	0	0	1	0	0	0	0	0	0	0	0	0	0	0	0	0	0	0	0	0	0	0	0	0	0	0	0	0	0	0	0	0	0	0	1	0	0	0	0
BGC0000010	0	0	0	0	0	0	0	0	0	0	0	0	1	0	0	0	0	0	0	0	0	0	0	0	0	0	0	0	0	0	0	0	0	0	0	0	0	0	0	0	0	0	0	0	1	0	0	0	0
BGC0000014	0	0	0	0	0	0	0	0	0	0	0	0	0	0	0	0	0	0	0	0	0	0	0	0	0	0	0	0	0	0	0	0	0	0	0	0	0	0	0	0	0	0	0	0	0	0	0	0	0
BGC0000019	0	0	0	0	0	0	0	0	0	0	0	0	0	0	0	0	0	0	0	0	0	0	0	0	0	0	0	0	0	0	0	0	0	0	0	0	0	0	0	0	0	0	0	0	0	0	0	0	0
BGC0000020	0	0	0	0	1	0	0	0	0	0	0	0	0	0	0	0	0	0	0	0	0	0	0	0	0	0	0	0	0	1	0	0	0	0	0	0	0	0	0	1	0	0	0	0	0	0	0	0	0
BGC0000021	0	0	0	0	0	0	0	0	0	0	0	0	0	0	0	0	0	0	0	0	0	0	0	0	0	0	0	0	0	0	0	0	0	0	0	0	0	0	0	0	0	0	0	0	0	0	0	0	0
BGC0000022	0	0	0	0	0	0	0	0	0	0	0	0	2	0	0	0	0	0	0	0	0	0	0	0	0	0	0	0	0	0	0	0	0	0	0	0	0	0	0	0	0	0	0	0	1	0	0	0	0
BGC0000026	0	0	0	0	0	0	0	0	0	0	0	0	0	0	0	0	0	0	0	0	0	1	0	0	0	0	0	0	0	0	0	0	0	0	0	0	0	0	0	0	0	0	0	0	0	0	0	0	0
BGC0000027	0	0	0	0	0	0	0	0	0	0	0	0	1	0	0	0	0	0	0	0	0	0	0	0	0	0	0	0	0	0	0	0	0	0	1	0	0	0	0	0	0	0	0	0	2	0	0	0	0
BGC0000029	0	0	0	0	0	0	0	0	0	0	0	0	1	0	0	0	0	0	0	0	0	0	0	0	0	0	0	0	0	0	0	0	0	1	0	0	0	1	0	0	0	0	0	0	0	0	0	0	0
BGC0000030	0	0	0	0	0	0	0	0	0	0	0	0	0	0	1	0	0	0	0	0	0	0	0	0	0	0	0	0	0	0	0	0	0	0	0	0	0	0	0	0	0	0	0	0	0	0	0	0	0
BGC0000032	0	0	0	0	0	0	0	0	0	0	0	0	0	0	0	0	0	0	0	0	0	0	0	0	0	0	0	0	0	0	0	0	0	0	0	0	0	0	0	0	0	0	0	0	0	2	0	0	0
BGC0000033	0	0	0	0	0	0	0	0	0	0	0	0	1	0	0	0	0	0	0	0	0	1	0	0	0	0	0	0	0	0	0	0	0	0	0	0	0	0	0	0	0	0	0	0	1	0	0	0	0
BGC0000034	0	0	0	0	0	0	0	0	0	0	0	0	0	0	0	0	0	0	0	0	0	1	0	0	0	0	0	0	0	0	0	0	0	0	0	0	0	0	0	0	0	0	0	0	0	0	0	0	0
BGC0000036	0	0	0	0	0	0	0	0	0	0	0	0	1	0	0	0	0	0	0	0	0	0	0	0	0	0	0	0	0	0	0	0	0	1	0	0	0	0	0	0	0	0	0	0	0	0	0	0	0
BGC0000038	0	0	0	0	0	0	0	0	1	0	0	0	1	0	0	0	0	0	0	0	0	0	0	0	0	0	0	0	0	0	0	0	0	1	0	0	0	0	0	0	0	0	0	0	0	0	0	0	0
BGC0000039	0	0	0	0	0	0	0	0	0	0	0	0	1	0	0	0	0	0	0	0	0	0	0	0	0	0	0	0	0	0	0	0	0	0	0	0	0	0	0	0	0	0	0	0	1	0	0	0	0
BGC0000040	0	0	0	0	0	0	0	0	0	0	0	0	0	0	0	0	0	0	0	0	0	0	0	0	0	0	0	0	0	0	0	0	0	0	0	0	0	0	0	0	0	0	0	0	0	0	0	0	0
BGC0000042	0	0	0	0	0	0	0	0	0	0	0	0	0	0	0	0	0	0	0	0	0	1	0	0	0	0	0	0	0	0	0	0	0	0	0	0	0	0	0	0	0	0	0	0	0	0	0	0	0
BGC0000045	0	0	0	0	0	0	0	0	0	0	0	0	1	0	0	0	0	0	0	0	0	0	0	0	0	0	0	0	0	0	0	0	0	0	0	0	0	0	0	0	0	0	0	0	1	0	0	0	0
BGC0000046	0	0	0	0	0	0	0	0	0	0	0	0	0	0	0	0	0	0	0	0	0	0	0	0	0	0	0	0	0	0	0	0	0	0	0	0	0	0	0	0	0	0	0	0	1	0	0	0	0
BGC0000048	0	0	0	0	1	0	0	0	0	0	0	0	0	0	0	0	0	0	0	0	0	0	0	0	0	0	0	0	0	0	0	0	0	0	0	0	0	0	0	0	0	0	0	0	0	0	0	0	0
BGC0000052	0	0	0	0	0	0	0	0	0	0	0	0	0	0	0	0	0	0	0	0	0	1	0	0	0	0	0	0	0	0	0	0	0	0	0	0	0	0	0	0	0	0	0	0	0	0	0	0	0
BGC0000053	0	0	0	0	0	0	0	0	0	0	0	0	0	0	0	0	0	0	0	0	0	1	0	0	0	0	0	0	0	0	0	0	0	0	0	0	0	0	0	0	0	0	0	0	0	0	0	0	0
BGC0000059	0	0	0	0	0	0	0	0	0	0	0	0	0	0	0	0	0	0	0	0	0	0	0	0	0	0	0	0	0	0	0	0	0	0	0	0	0	1	0	0	0	0	0	0	0	0	0	0	0
BGC0000060	0	0	0	0	0	0	0	0	0	0	0	0	0	0	0	0	0	0	0	0	1	0	0	0	0	0	0	0	0	0	0	0	0	0	0	0	0	0	0	0	0	0	0	0	0	0	0	0	0
BGC0000061	0	0	0	0	0	0	0	0	0	0	0	0	0	0	0	0	0	0	0	0	0	1	0	0	0	0	0	0	0	0	0	0	0	0	0	0	0	0	0	0	0	0	0	0	0	0	0	0	0
BGC0000062	0	0	0	0	0	0	0	0	0	0	0	0	0	0	0	0	0	0	0	0	0	0	0	0	0	0	0	0	0	0	0	0	0	0	0	0	0	0	0	0	0	0	0	0	0	0	0	0	0
BGC0000063	0	0	0	0	0	0	0	0	0	0	0	0	0	0	0	0	0	0	0	0	0	0	0	0	0	0	0	0	0	0	0	0	0	0	0	0	0	0	0	0	0	0	0	0	0	0	0	0	0
BGC0000066	0	0	0	0	0	0	0	0	0	0	0	0	0	0	0	0	0	0	0	0	0	0	0	0	0	0	0	0	0	0	0	0	0	0	0	0	0	1	0	0	0	0	0	0	0	0	0	0	0
BGC0000068	0	0	0	0	0	0	0	0	0	0	0	0	0	0	0	0	0	0	0	0	0	0	0	0	0	0	0	0	0	0	0	0	0	0	1	0	0	0	0	0	0	0	0	0	0	0	0	0	0
BGC0000069	0	0	0	0	0	0	0	0	0	0	0	0	0	0	0	0	0	0	0	0	0	0	0	0	0	0	0	0	0	0	0	0	0	0	0	0	0	0	0	0	0	0	0	0	0	0	0	0	0
BGC0000070	0	0	0	0	0	0	0	0	0	0	0	0	1	0	0	0	0	0	0	0	0	0	0	0	0	0	0	0	0	0	0	0	0	0	0	0	0	0	0	0	0	0	0	0	1	0	0	0	0
BGC0000074	2	1	0	0	0	0	0	0	0	0	0	0	1	0	0	0	0	0	0	0	0	0	0	0	0	0	0	0	0	0	0	0	0	1	0	0	0	0	0	0	0	0	0	0	0	0	0	0	0
BGC0000076	0	0	0	0	0	0	0	0	0	0	0	0	0	0	0	0	0	0	0	0	0	0	0	0	0	0	0	0	0	0	0	0	0	0	0	0	0	0	0	0	0	0	0	0	1	0	0	0	0
BGC0000077	0	0	0	0	0	0	0	0	0	0	0	0	0	0	0	0	0	0	0	0	0	0	0	0	0	0	0	0	0	0	0	0	0	0	0	0	0	0	0	0	0	0	0	0	1	0	0	0	0
BGC0000078	0	0	0	0	0	0	0	0	0	0	0	0	0	0	0	0	0	0	0	0	0	1	0	0	0	0	0	0	0	0	0	0	0	0	0	0	0	0	0	0	0	0	0	0	0	0	0	0	0
BGC0000079	0	0	0	0	0	0	0	0	0	0	0	0	1	0	0	1	0	0	0	0	0	0	0	0	0	0	0	0	0	0	0	0	0	1	0	0	0	0	0	0	0	0	0	0	0	0	0	0	0
BGC0000081	0	0	0	0	0	0	0	0	0	0	0	0	1	0	0	0	0	0	0	0	0	0	0	0	0	0	0	0	0	0	0	0	0	1	0	0	0	0	0	0	0	0	0	0	0	0	0	0	0
BGC0000082	0	0	0	0	0	0	0	0	0	0	0	0	1	0	0	0	0	0	0	0	0	0	0	0	0	0	0	0	0	0	0	0	0	1	0	0	0	0	0	0	0	0	0	0	0	0	0	0	0
BGC0000084	0	0	0	0	0	0	0	0	0	0	0	0	1	0	0	0	0	0	0	0	0	0	0	0	0	0	0	0	0	0	0	0	0	0	0	0	0	0	0	0	0	0	0	0	1	0	0	0	0
BGC0000085	0	0	0	0	0	0	0	0	0	0	0	0	0	0	0	0	0	0	0	0	0	0	0	0	0	0	0	0	0	0	0	0	0	0	0	0	0	0	0	0	0	0	0	0	0	0	0	0	0
BGC0000086	0	0	0	0	0	0	0	0	0	0	0	0	1	0	0	0	0	0	0	0	0	0	0	0	0	0	0	0	0	0	0	0	0	1	0	0	0	0	0	0	0	0	0	0	0	0	0	0	0
BGC0000087	0	0	0	0	0	0	0	0	0	0	0	0	2	0	0	0	0	0	0	0	0	0	0	0	0	0	1	1	0	0	0	0	0	2	0	0	0	0	0	0	0	0	0	0	0	0	0	0	0
BGC0000088	0	0	0	0	1	0	0	0	0	0	0	0	1	0	0	0	0	0	0	0	0	0	0	0	0	0	0	0	0	0	0	0	0	0	0	0	0	0	0	0	0	0	0	0	1	0	0	0	0
BGC0000093	0	0	0	0	0	2	0	0	0	0	0	1	1	0	0	0	0	0	0	0	0	0	0	0	0	0	0	0	0	0	0	0	0	0	0	0	0	0	0	0	0	0	0	0	0	0	0	0	0
BGC0000097	0	0	0	0	0	0	0	0	0	0	0	0	1	0	0	0	0	0	0	0	0	0	0	0	0	0	0	0	0	0	0	0	0	1	0	0	0	1	0	0	0	0	0	0	0	0	0	0	0
BGC0000098	0	0	0	0	0	0	0	0	0	0	0	0	1	0	0	0	0	0	0	0	0	0	0	0	0	0	0	0	0	0	0	0	0	0	0	0	0	0	0	0	0	0	0	0	1	0	0	0	0
BGC0000100	0	0	0	0	0	0	0	0	0	0	0	0	1	0	0	0	0	0	0	0	0	0	0	0	0	0	0	0	0	0	0	0	0	0	0	0	0	0	0	0	0	0	0	0	1	0	0	0	0
BGC0000105	0	0	0	0	0	0	0	0	0	0	0	0	0	0	0	0	0	0	0	0	0	0	0	0	0	0	0	0	0	0	0	0	0	0	0	0	0	0	0	0	0	0	0	0	0	0	0	0	0
BGC0000106	0	0	0	0	0	0	0	0	0	0	0	0	0	0	0	0	0	0	0	0	0	0	0	0	0	0	0	0	0	0	0	0	0	0	0	0	0	0	0	0	0	0	0	0	0	0	0	0	0
BGC0000108	0	0	0	0	0	0	0	0	0	0	0	0	0	0	0	0	0	0	0	0	0	0	0	0	0	0	0	0	0	2	0	0	0	0	0	0	0	1	0	1	0	0	0	0	0	0	0	0	0
BGC0000112	0	0	0	0	0	0	0	0	0	0	0	0	1	0	0	0	0	0	0	0	0	0	0	0	0	0	0	0	0	0	0	0	0	0	0	0	0	0	0	0	0	0	0	0	1	0	0	0	0
BGC0000114	0	0	0	0	0	0	0	0	0	0	0	0	0	0	0	0	0	0	0	0	0	0	0	0	0	0	0	0	0	0	0	0	0	0	0	0	0	0	0	0	0	0	0	0	0	0	0	0	0
BGC0000115	0	0	0	0	0	0	0	0	0	0	0	0	0	0	0	0	0	0	0	0	0	0	0	0	0	0	0	0	0	2	0	0	0	0	0	0	0	0	0	1	0	0	0	0	0	0	0	0	0
BGC0000116	0	0	0	0	0	0	0	0	0	0	0	0	0	0	0	0	0	0	0	0	0	0	0	0	0	0	0	0	0	2	0	0	0	0	0	0	0	0	0	1	0	0	0	0	0	0	0	0	0
BGC0000120	0	0	0	0	0	0	0	0	0	0	0	0	1	0	0	0	0	0	0	0	0	0	0	0	0	0	0	0	0	0	0	0	0	0	0	0	0	1	0	0	0	0	0	0	1	0	0	0	0
BGC0000123	0	0	0	0	0	0	0	0	0	0	0	0	1	0	0	0	0	0	0	0	0	0	0	0	0	0	0	0	0	0	0	0	0	0	0	0	0	0	0	0	0	0	0	0	0	0	0	0	0
BGC0000125	0	0	0	0	0	0	0	0	0	0	0	0	0	0	0	0	0	0	0	0	0	0	0	0	0	0	0	0	0	2	0	0	0	0	0	0	0	0	0	1	0	0	0	0	0	0	0	0	0
BGC0000127	0	0	0	0	0	0	0	0	0	0	0	0	0	0	0	0	0	0	0	0	0	2	0	0	0	0	0	0	0	0	0	0	0	0	0	0	0	0	0	0	0	0	0	0	0	0	0	0	0
BGC0000128	0	0	0	0	0	0	0	0	0	0	0	0	0	0	0	0	0	0	0	0	0	2	0	0	0	0	0	0	0	0	0	0	0	0	0	0	0	0	0	0	0	0	0	0	0	0	0	0	0
BGC0000133	0	0	0	0	0	0	0	0	0	0	0	0	0	0	0	1	0	0	1	0	0	0	0	0	0	0	0	0	0	0	0	0	0	0	0	0	0	0	0	0	0	0	0	0	0	0	0	0	0
BGC0000134	0	0	0	0	0	0	0	0	0	0	0	0	0	0	1	0	0	0	0	0	0	0	0	0	0	0	0	0	0	0	0	0	0	0	0	0	0	0	0	0	0	0	0	0	0	0	0	0	0
BGC0000135	0	0	0	0	0	0	0	0	0	0	0	0	0	0	0	0	0	0	1	0	0	0	0	0	0	0	0	0	0	0	0	0	0	0	1	0	0	0	0	0	0	0	0	0	0	0	0	1	0
BGC0000136	0	0	0	0	0	0	0	0	0	0	0	0	1	0	0	0	0	0	1	0	0	0	0	0	0	0	0	0	0	0	0	0	0	1	0	0	0	0	0	0	0	0	0	0	0	0	0	0	0
BGC0000140	0	0	0	0	0	0	0	0	0	0	0	0	1	0	0	0	0	0	0	0	0	0	0	0	0	0	0	0	0	0	0	0	0	1	0	0	0	0	0	0	0	0	0	0	0	0	0	0	0
BGC0000141	0	0	0	0	0	0	0	0	0	0	0	0	0	0	0	0	0	0	0	0	0	1	0	0	0	0	0	0	0	0	0	0	0	0	0	0	0	0	0	0	0	0	0	0	0	0	0	0	0
BGC0000142	0	0	0	0	0	0	0	0	0	0	0	0	1	0	0	1	0	0	0	0	0	0	0	0	0	0	0	0	0	0	0	0	0	1	0	0	0	0	0	0	0	0	0	0	0	0	0	0	0
BGC0000143	0	0	0	0	0	0	0	0	0	0	0	0	0	0	0	0	0	0	0	0	0	0	0	0	0	1	0	0	0	0	0	0	0	0	1	0	0	0	0	0	0	0	0	0	0	0	0	0	0
BGC0000144	0	0	0	0	0	0	0	0	0	0	0	0	0	0	0	0	0	0	0	0	0	1	0	0	0	0	0	0	0	0	0	0	0	0	0	0	0	0	0	0	0	0	0	0	0	0	0	1	0
BGC0000148	0	0	0	0	0	0	0	0	0	0	0	0	0	0	0	0	0	0	0	0	0	0	0	0	0	0	0	0	0	0	0	0	0	0	0	0	0	0	0	0	0	0	0	0	0	0	0	0	0
BGC0000150	0	0	0	0	0	0	0	0	0	0	0	0	2	0	0	0	0	0	0	0	0	0	0	0	0	0	0	0	0	0	0	0	0	2	0	0	0	0	0	0	0	0	0	0	0	0	0	0	0
BGC0000151	0	0	0	0	0	0	0	0	0	0	0	0	0	0	0	1	0	0	0	0	0	1	0	0	0	0	0	0	0	0	0	0	0	0	0	0	0	0	0	0	0	0	0	0	0	0	0	0	0
BGC0000154	0	0	0	0	0	0	0	0	0	0	0	0	0	0	1	0	0	0	0	0	0	0	0	0	0	0	0	0	0	0	0	0	0	0	0	0	0	0	0	0	0	0	0	0	0	0	0	0	0
BGC0000158	0	0	0	0	0	0	0	0	0	0	0	0	1	0	0	0	0	0	0	0	0	0	0	0	0	0	0	0	0	0	0	0	0	1	0	0	0	0	0	0	0	0	0	0	0	0	0	0	0
BGC0000160	0	0	0	0	0	0	0	0	0	0	0	0	0	0	1	0	0	0	0	0	0	0	0	0	0	0	0	0	0	0	0	0	0	0	0	0	0	0	0	0	0	0	0	0	0	0	0	0	0
BGC0000161	0	0	0	0	0	0	0	0	0	0	0	0	0	0	0	0	0	0	0	0	0	0	0	0	0	0	0	0	0	0	0	0	0	1	0	0	0	0	0	0	0	0	0	0	0	0	0	0	0
BGC0000162	0	0	0	0	0	0	0	0	0	0	0	0	1	0	0	0	0	0	0	0	0	0	0	0	0	0	0	0	0	0	0	0	0	1	0	0	0	0	0	0	0	0	0	0	0	0	0	0	0
BGC0000163	0	0	0	0	0	1	0	0	0	0	0	0	0	0	0	0	0	0	0	0	0	1	0	0	0	0	0	0	0	0	0	0	0	0	0	0	0	0	0	0	0	0	0	0	0	0	0	2	0
BGC0000164	0	0	0	0	0	0	0	0	0	0	0	0	0	0	0	0	0	0	0	0	0	0	0	0	0	0	0	0	0	0	0	0	0	0	0	0	0	0	0	0	0	0	0	0	0	0	0	0	0
BGC0000165	0	0	0	0	0	0	0	0	0	0	0	0	1	0	0	0	0	0	0	0	0	0	0	0	0	0	0	0	0	0	0	0	0	0	1	0	0	1	0	0	0	0	0	0	1	0	0	0	0
BGC0000167	1	0	0	0	0	0	0	0	0	0	0	0	0	0	0	0	0	0	0	0	0	0	0	0	0	0	0	0	0	0	0	0	0	0	0	0	0	0	0	0	0	0	0	0	0	0	0	0	0
BGC0000168	0	0	0	0	0	0	0	0	0	0	0	0	0	0	1	0	0	0	0	0	0	0	0	0	0	0	0	0	0	0	0	0	0	0	0	0	0	0	0	0	0	0	0	0	0	0	0	0	0
BGC0000171	0	0	0	0	0	0	0	0	0	0	0	0	1	0	0	0	0	0	0	0	0	0	0	0	0	0	0	0	0	0	0	0	0	1	0	0	0	0	0	0	0	0	0	0	0	0	0	1	0
BGC0000178	0	0	0	0	1	0	0	0	0	0	0	0	1	0	0	0	0	0	0	0	0	0	0	0	0	0	0	0	0	0	0	0	0	0	0	0	0	0	0	0	0	0	0	0	0	0	0	0	0
BGC0000179	0	0	0	0	0	0	0	0	0	0	0	0	0	0	0	0	0	0	0	0	0	0	0	0	0	0	0	0	0	0	0	0	0	0	1	0	0	0	0	0	0	0	0	0	0	0	0	0	0
BGC0000180	0	0	0	0	0	0	0	0	0	0	0	1	1	0	0	0	0	0	0	0	0	0	0	0	0	0	0	0	0	0	0	0	0	0	0	0	0	0	0	0	0	0	0	0	0	0	0	0	0
BGC0000187	0	0	0	0	0	0	0	0	0	0	0	0	1	0	0	0	0	0	0	0	0	0	0	0	0	0	0	0	0	0	0	0	0	1	0	0	0	0	0	0	0	0	0	0	0	0	0	0	0
BGC0000188	0	0	0	0	0	0	0	0	0	0	0	0	0	0	0	0	0	0	0	0	0	0	0	0	0	1	0	0	0	0	0	0	0	0	0	0	0	0	0	0	0	0	0	0	0	0	0	0	0
BGC0000190	0	0	0	0	0	0	0	0	0	0	0	0	1	0	0	0	0	0	0	0	0	0	0	0	0	0	0	0	0	0	0	0	0	1	0	0	0	0	0	0	0	0	0	0	0	0	0	0	0
BGC0000191	0	0	0	0	0	0	0	0	0	0	0	0	0	0	0	0	0	0	0	0	0	1	0	0	0	0	0	0	0	0	0	0	0	0	0	0	0	0	0	0	0	0	0	0	0	0	0	0	0
BGC0000194	0	0	0	0	0	0	0	0	0	0	0	0	2	0	0	0	0	0	0	0	0	0	0	0	0	0	0	0	0	0	0	0	0	2	0	0	0	0	0	0	0	0	0	0	0	2	0	0	0
BGC0000195	0	0	0	0	0	0	0	0	0	0	0	0	1	0	0	0	0	0	0	0	0	0	0	0	0	0	0	0	0	0	0	0	0	1	0	0	0	0	0	0	0	0	0	0	0	2	0	0	0
BGC0000197	0	0	0	0	0	0	0	0	0	0	0	0	1	0	0	0	0	0	0	0	0	0	0	0	0	0	0	0	0	0	0	0	0	0	0	0	0	0	0	0	0	0	0	0	0	0	0	0	0
BGC0000198	0	0	0	0	0	0	0	0	0	0	0	0	0	0	0	0	0	0	0	0	0	1	0	0	0	0	0	0	0	0	0	0	0	0	0	0	0	0	0	0	0	0	0	0	0	0	0	0	0
BGC0000199	0	0	0	0	0	0	0	0	0	0	0	0	0	0	0	0	0	0	0	0	0	1	0	0	0	0	0	0	0	0	0	0	0	0	0	0	0	0	0	0	0	0	0	0	0	0	0	0	0
BGC0000200	0	0	0	0	0	1	0	0	0	0	0	0	0	0	0	0	0	0	0	0	0	1	0	0	0	0	0	0	0	0	0	0	0	0	0	0	0	0	0	0	0	0	0	0	0	0	0	0	0
BGC0000201	0	0	0	0	0	0	0	0	0	0	0	0	1	0	0	0	0	0	0	0	0	0	0	0	0	0	0	0	0	0	0	0	0	1	0	0	0	0	0	0	0	0	0	0	0	0	0	0	0
BGC0000202	0	0	0	0	0	0	0	0	0	0	0	0	2	0	0	0	0	0	0	0	0	0	0	0	0	0	0	0	0	0	0	0	0	2	0	0	0	0	0	0	0	0	0	0	0	0	0	0	0
BGC0000203	0	0	0	0	0	0	0	0	0	0	0	0	1	0	0	0	0	0	0	0	0	0	0	0	0	0	0	0	0	0	0	0	0	2	1	0	0	0	0	0	0	0	0	0	0	0	0	0	0
BGC0000207	1	1	1	0	0	0	0	0	0	0	0	0	1	0	0	0	0	0	0	0	0	0	0	0	0	0	0	0	0	0	0	0	0	1	0	0	0	0	0	0	0	0	0	0	0	0	0	0	0
BGC0000208	0	0	0	0	0	0	0	0	0	0	0	0	1	0	0	0	0	0	0	0	0	0	0	0	0	0	0	0	0	0	0	0	0	1	0	0	0	0	0	0	0	0	0	0	0	0	0	0	0
BGC0000209	0	0	0	0	0	0	0	0	0	0	0	0	2	0	0	0	0	0	0	0	0	0	0	0	0	0	0	0	0	0	0	0	0	0	0	0	0	0	0	0	0	0	0	0	1	0	0	0	0
BGC0000210	0	0	0	0	0	0	0	0	0	0	0	0	0	0	0	0	0	0	0	0	0	1	0	0	0	0	0	0	0	0	0	0	0	0	0	0	0	0	0	0	0	0	0	0	0	0	0	0	0
BGC0000211	0	0	0	0	0	0	1	0	0	0	0	0	0	0	0	0	0	0	0	0	0	0	0	0	0	0	0	0	0	0	0	0	0	0	0	0	0	0	0	0	0	0	0	0	0	0	0	0	0
BGC0000212	0	0	0	0	0	0	0	0	0	0	0	0	0	0	0	0	0	0	0	0	0	1	0	0	0	0	0	0	0	0	0	0	0	0	0	0	0	0	0	0	0	0	0	0	0	0	0	0	0
BGC0000213	0	0	0	0	0	0	0	0	0	0	0	0	1	0	0	0	0	0	0	0	0	0	0	0	0	0	0	0	0	0	0	0	0	1	0	0	0	0	0	0	1	0	0	0	0	0	0	0	0
BGC0000214	0	0	0	0	0	0	0	0	0	0	0	0	0	0	0	0	0	0	0	0	0	1	0	0	0	0	0	0	0	0	0	0	0	0	0	0	0	0	0	0	0	0	0	0	0	0	0	0	0
BGC0000216	0	0	0	0	0	0	0	0	1	0	0	0	1	0	0	0	0	0	0	0	0	0	0	0	0	0	0	0	0	0	0	0	0	0	0	0	0	0	0	0	0	0	0	0	0	0	0	0	0
[truncated: 1,001 more rows]
[truncated: 141 more columns]

## Sheet: Table S4 - Biosynthetic PFAMs
BGC	2-Hacid_dh	2-Hacid_dh_C	3HCDH	3HCDH_N	4HBT	Abhydrolase_1	Abhydrolase_3	Acetyltransf_1	ACPS	ACP_syn_III	ACP_syn_III_C	Acyl-CoA_dh_1	Acyl-CoA_dh_M	Acyl-CoA_dh_N	Acyl_transf_1	Acyl_transf_3	ADH_N	adh_short	ADH_zinc_N	Aldedh	Aldo_ket_red	Aminotran_1_2	Aminotran_3	Aminotran_5	Amino_oxidase	AMP-binding	APH	Apolipoprotein	Bac_luciferase	Bac_transf	CbiA	Condensation	Cupin_2	Cys_Met_Meta_PP	DAO	DegT_DnrJ_EryC1	dTDP_sugar_isom	ECH_1	Epimerase	Epimerase_2	Esterase	FabA	FAD_binding_2	FAD_binding_3	FAD_binding_4	Fe-ADH	Fer2	Fer2_BFD	Fer4
[truncated: 1,720 more rows]
[truncated: 50 more columns]

[truncated: 3 more sheets: Table S5 - ML Metrics, Table S6- Siderophore-like BGCs, Table S7- Siderophore-like BGCs NRPS]
